# Supplementary material
Source: publisher figshare collection journal article supplement (https://acs.figshare.com/ndownloader/files/3947650)
Supplement: Supplementary file 1 [file 3947650]

# ***Understanding of the Weak Intermolecular Interactions Involving Halogens in Substituted N-benzylideneanilines: Insights from Structural and Computational Perspectives***

Gurpreet Kaur, and Angshuman Roy Choudhury\*

Department of Chemical Sciences, Indian Institute of Science Education and Research (IISER) Mohali, Sector 81, Knowledge City, S. A. S. Nagar, Manauli PO, Mohali, 140306. Punjab, India.

**Keywords:** Weak interactions, organic fluorine, benzylideneanilines, *in situ* crystallization, polymorphism.

## **Electronic Supplementary Information**

### **Procedure for synthesis:**

All the starting materials, namely *ortho*-, *meta*- and *para*- halogenated benzaldehydes and anilines were purchased from Sigma Aldrich and were used without further purification. Corresponding benzaldehyde (0.5 mmol) and aniline (0.5 mmol) were dissolved in dichloromethane (DCM) at 298 K. Anhydrous Na<sub>2</sub>SO<sub>4</sub> was added to that mixture to remove the water molecules produced during the condensation reaction. The solution was stirred for ~10 minutes and then the solvent was evaporated under reduced pressure to get the condensed product. Pure crystals were obtained by recrystallization from different organic solvents like methanol, ethanol, hexane, ethyl acetate, chloroform and DCM.

### **Details of Powder X-ray Diffraction:**

Powder X-ray Diffraction (PXRD) data were recorded on a Rigaku Ultima IV diffractometer using parallel beam geometry, Cu – K $\alpha$  radiation, 2.5° primary and secondary solar slits, 0.5° divergence slit with 10 mm height limit slit, sample rotation stage (120 rpm) attachment and DTex Ultra detector. The tube voltage and current applied were 40 kV and 40 mA respectively. The data sets were collected over 2 $\theta$  ranging from 5 to 50° with a scanning speed of 5° per minute with 0.02° step for all the solid compounds.

### **Details of Single Crystal X-ray Diffraction Data Collection, Structure Solution and Refinement:**

Single crystals of all the purified solids were grown from different organic solvents (methanol, ethanol, acetone, dichloromethane, hexane, toluene etc.) and solvent mixtures (Table 1) at low temperature (4 °C or -20 °C). All the crystallization products were checked

using optical polarizing microscope for their morphologies and those were then checked for the identification of different polymorphs, if any, by unit cell determination using single crystal X-ray diffraction (SCXRD) technique. The compounds 18, 22, 28, and 34 yielded two polymorphs each from different solvents (Table 1). Single crystal X-ray diffraction data for all the compounds were collected using Bruker AXS KAPPA APEX-II CCD diffractometer (Monochromatic Mo – K $\alpha$  radiation) equipped with Oxford cryosystem 700Plus at 100.0(1) K. Data collection and unit cell refinement for the data sets were done using Bruker APEX-II<sup>1</sup> suit, data reduction and integration were performed by SAINT V7.685A12 (Bruker AXS, 2009) and absorption corrections and scaling was done using SADABS V2008/112 (Bruker AXS). The crystal structures were solved by using Olex2<sup>2</sup> or WinGx<sup>3</sup> packages using SHELXS97<sup>4</sup> and the structures were refined using SHELXL97<sup>4</sup>. All the hydrogen atoms have been geometrically fixed and refined using the riding model. Table 1 lists the crystal and refinement data for all the compounds. All the packing and interaction diagrams have been generated using Mercury 3.1.1. Geometric calculations have been done using PARST<sup>5</sup> and PLATON<sup>6</sup>.

#### **Crystal Growth and Data collection for Liquids:**

Out of 54 synthesized compounds, compounds **20**, **23**, **27**, **29**, **30**, **38**, **44**, **45**, **47** and **48** were found to be liquids at room temperature (25 °C). Out of these, structure of compound **23** (Melting point 22 °C) could be determined when room temperature was around 20 °C. Structure of compound **44** was determined by *in situ* crystallization technique<sup>7</sup>. In this case, the compound was taken in 0.3 mm Lindemann quartz capillary and was sealed at both ends with glue and was mounted on Bruker AXS KAPPA APEX-II CCD diffractometer with the capillary aligned vertically. For Compound **44**, the capillary was then cooled at 200K/hr to 180K, the liquid solidified by itself at this temperature. At the same rate, then it was heated from 180 to 220K. Still images were taken from time to time to see if there is any formation of crystals. It has been seen that at 210 K, compound got converted into a polycrystalline material. After that, even by heating from 220 K to 260 K at 200 K/hr, it remained polycrystalline. Then at 260 K, a few cycles of zone melting scans using the CO<sub>2</sub> LASER of the OHCD<sup>8</sup> were repeated for 6 hours to grow single crystal in the capillary. After the formation of a single crystal, one  $\Phi$  scan (scan width 0.3°, 1200 frames) data were collected keeping  $\omega$  and  $\kappa$  fixed at 0° and the detector fixed at 30° and with a detector distance of 6.0 cm.

For rest of the liquid compounds, the single crystal structure could not be determined as all those compounds were not crystallizing even by repeated heating or cooling cycles. Rather, they were forming only glassy material. DSC's of all those compounds have not shown any features too except in compound **29**, where a sharp peak has been seen in DSC, but still could not be crystallized *in situ*.

#### **Crystallographic modelling of disorder:**

Among all the 45 compounds reported in this paper, compound number (C.N.) **33**, **51**, **52**, and **56** were found to exhibit positional disorder due to in plane flipping of the molecule around C=N bond. But C.N. **23** and **41** were found to have positional disorder due to rotation of the aniline ring around C8–N1 bond. All these positional disorders were analysed with PART command using SHELXL97 and were refined for two independent positions, namely A and B ('A' for higher occupancy). For the purpose of refinement, the position of the carbon atoms in part A and B of the phenyl rings were fixed at same position using EXYZ command in SHELXL97. Thermal parameters were also constrained to be equal for the atoms at the same position using EADP command in SHELXL97. All hydrogen atoms were then positioned geometrically and refined using a riding model with  $U_{iso}(H) = 1.2 U_{eq}(C,N)$ . The occupancy ratio for the two parts in C.N. **23**, **33**, **41**, **52**, and **56** were found to be 0.617(4) : 0.383(4), 0.909(1) : 0.091(1), 0.525(2) : 0.475(2), 0.544(2) : 0.456(2), and 0.627(1) : 0.373(1) respectively. The remaining molecules didn't find to exhibit any disorder.

### Crystallographic Data Tables for all the compounds reported in the manuscript

|                                                            |                                     |                                     |                                     |                                     |                                     |
|------------------------------------------------------------|-------------------------------------|-------------------------------------|-------------------------------------|-------------------------------------|-------------------------------------|
| Identification code                                        | 43                                  | 25                                  | 16F1                                | 16F2                                | 34                                  |
| Empirical formula                                          | C <sub>13</sub> H <sub>9</sub> ClFN | C <sub>13</sub> H <sub>9</sub> BrFN | C <sub>13</sub> H <sub>9</sub> BrFN | C <sub>13</sub> H <sub>9</sub> BrFN | C <sub>13</sub> H <sub>9</sub> ClFN |
| Formula weight                                             | 233.66                              | 278.12                              | 278.12                              | 278.12                              | 233.66                              |
| Temperature (K)                                            | 100.0K                              | 100.0K                              | 100.0K                              | 100.0K                              | 100.0K                              |
| CCDC No.                                                   | 904772                              | 904759                              | 904752                              | 904753                              | 904765                              |
| Solvent system                                             | Acetone                             | Methanol                            | DCM+Hexane                          | Ethanol                             | Ethyl Acetate                       |
| Morphology                                                 | block                               | plate                               | rect. block                         | plate                               | block                               |
| Crystal system                                             | triclinic                           | monoclinic                          | monoclinic                          | orthorhombic                        | monoclinic                          |
| Space group                                                | $P\bar{1}$                          | $P2_1/c$                            | $P2_1/c$                            | $Pna2_1$                            | $P2_1/c$                            |
| a/Å                                                        | 9.240(2)                            | 15.2489(5)                          | 23.950(5)                           | 11.646(4)                           | 23.596(2)                           |
| b/Å                                                        | 9.283(2)                            | 15.6548(5)                          | 6.3629(15)                          | 26.988(8)                           | 6.3391(4)                           |
| c/Å                                                        | 13.168(3)                           | 17.0477(7)                          | 7.2093(15)                          | 7.113(2)                            | 7.0801(4)                           |
| $\alpha/^\circ$                                            | 81.794(5)                           | 90.00                               | 90.00                               | 90.00                               | 90.00                               |
| $\beta/^\circ$                                             | 80.917(5)                           | 123.158(1)                          | 94.890(7)                           | 90.00                               | 95.323(4)                           |
| $\gamma/^\circ$                                            | 77.366(5)                           | 90.00                               | 90.00                               | 90.00                               | 90.00                               |
| Volume/Å <sup>3</sup>                                      | 1081.5(4)                           | 3406.9(2)                           | 1094.7(4)                           | 2235.6(11)                          | 1054.5(1)                           |
| Z                                                          | 4                                   | 12                                  | 4                                   | 8                                   | 4                                   |
| Z'                                                         | 2                                   | 3                                   | 1                                   | 1                                   | 1                                   |
| $\rho_{\text{calc}}$ /mg/mm <sup>3</sup>                   | 1.435                               | 1.627                               | 1.688                               | 1.653                               | 1.472                               |
| $\mu$ /mm <sup>-1</sup>                                    | 0.334                               | 3.602                               | 3.737                               | 3.659                               | 0.343                               |
| F(000)                                                     | 480                                 | 1656.0                              | 552                                 | 1104                                | 480                                 |
| Crystal size/mm <sup>3</sup>                               | 0.2 × 0.2 × 0.1                     | 0.3 × 0.1 × 0.1                     | 0.2 × 0.2 × 0.1                     | 0.2 × 0.2 × 0.1                     | 0.2 × 0.2 × 0.1                     |
| $\Theta_{\text{min, max}}$                                 | 1.58, 25.02°                        | 1.93, 25.03°                        | 2.56, 25.03°                        | 2.31, 25.02°                        | 2.6, 25.02°                         |
| hmin, hmax; kmin, kmax; lmin, lmax                         | -10, 10; -11, 10; -15, 15           | -16, 18; -18, 18; 20, 14            | -28, 27; -3, 7; -8, 8               | -13, 13; -32, 32; -3, 8             | -28, 24; -7, 7; -8, 8               |
| No. of reflections                                         | 7091                                | 24812                               | 8569                                | 12225                               | 4831                                |
| No. of Observed Reflections                                | 3820                                | 6024                                | 1945                                | 3060                                | 1863                                |
| No. of unique reflections                                  | 3053                                | 5149                                | 1681                                | 2760                                | 1670                                |
| R(int)                                                     | 0.0206                              | 0.0285                              | 0.0309                              | 0.0362                              | 0.0197                              |
| Data/restraints/parameters                                 | 3820/0/361                          | 6024/0/541                          | 1945/0/145                          | 3060/1/284                          | 1863/0/181                          |
| Goodness-of-fit on F <sup>2</sup>                          | 1.042                               | 1.040                               | 1.031                               | 1.038                               | 1.126                               |
| R <sub>obs</sub>                                           | 0.0454                              | 0.0402                              | 0.0262                              | 0.0244                              | 0.0358                              |
| wR <sub>2</sub> (obs)                                      | 0.1064                              | 0.1008                              | 0.0648                              | 0.0478                              | 0.0824                              |
| $\Delta\rho_{\text{min, max}} / \text{e } \text{\AA}^{-3}$ | 0.057/-0.339                        | 2.41/-1.13                          | 0.772/-0.376                        | 0.228/-0.248                        | 0.273/-0.386                        |



|                                                                                                                                                           |                                     |                                     |                                     |                                     |
|-----------------------------------------------------------------------------------------------------------------------------------------------------------|-------------------------------------|-------------------------------------|-------------------------------------|-------------------------------------|
| Identification code                                                                                                                                       | 44                                  | 26                                  | 35                                  | 17                                  |
| Empirical formula                                                                                                                                         | C <sub>13</sub> H <sub>9</sub> ClFN | C <sub>13</sub> H <sub>9</sub> BrFN | C <sub>13</sub> H <sub>9</sub> ClFN | C <sub>13</sub> H <sub>9</sub> BrFN |
| Formula weight                                                                                                                                            | 233.66                              | 278.12                              | 233.66                              | 278.12                              |
| Temperature (K)                                                                                                                                           | 100.0K                              | 100.0K                              | 100.0K                              | 100.0K                              |
| CCDC No.                                                                                                                                                  | 904773                              | 904760                              | 967464                              | 904754                              |
| Solvent system                                                                                                                                            | Methanol                            | Ethanol                             | Ethyl Acetate                       | DCM + Hexane                        |
| Morphology                                                                                                                                                | <i>In situ</i>                      | plate                               | needle                              | plate                               |
| Crystal system                                                                                                                                            | monoclinic                          | monoclinic                          | monoclinic                          | monoclinic                          |
| Space group                                                                                                                                               | <i>P</i> 2 <sub>1</sub> / <i>c</i>  |
| <i>a</i> /Å                                                                                                                                               | 12.626(2)                           | 12.8032(8)                          | 11.504(2)                           | 11.664(2)                           |
| <i>b</i> /Å                                                                                                                                               | 7.004(1)                            | 7.0146(4)                           | 4.725(1)                            | 4.7226(9)                           |
| <i>c</i> /Å                                                                                                                                               | 12.228(2)                           | 12.2477(8)                          | 24.275(4)                           | 21.437(4)                           |
| $\alpha$ /°                                                                                                                                               | 90.00                               | 90.00                               | 90.00                               | 90.00                               |
| $\beta$ /°                                                                                                                                                | 92.568(1)                           | 92.867(2)                           | 127.34(1)                           | 113.688(8)                          |
| $\gamma$ /°                                                                                                                                               | 90.00                               | 90.00                               | 90.00                               | 90.00                               |
| Volume/Å <sup>3</sup>                                                                                                                                     | 1080.3(3)                           | 1098.6(1)                           | 1049.1(3)                           | 1079.5(3)                           |
| <i>Z</i>                                                                                                                                                  | 4                                   | 4                                   | 4                                   | 4                                   |
| <i>Z'</i>                                                                                                                                                 | 1                                   | 1                                   | 1                                   | 1                                   |
| $\rho_{\text{calc}}$ /mg/mm <sup>3</sup>                                                                                                                  | 1.437                               | 1.682                               | 1.479                               | 1.711                               |
| $\mu$ /mm <sup>-1</sup>                                                                                                                                   | 0.335                               | 3.723                               | 0.345                               | 3.789                               |
| <i>F</i> (000)                                                                                                                                            | 480                                 | 552                                 | 480                                 | 552                                 |
| Crystal size/mm <sup>3</sup>                                                                                                                              | <i>In situ</i>                      | 0.3 × 0.2 × 0.1                     | 0.2 × 0.1 × 0.1                     | 0.2 × 0.2 × 0.1                     |
| $\Theta_{\text{min, max}}$                                                                                                                                | 3.23, 25.02°                        | 3.19, 25.02°                        | 1.93, 25.03°                        | 1.91, 25.03°                        |
| <i>h</i> <sub>min</sub> , <i>h</i> <sub>max</sub> ; <i>k</i> <sub>min</sub> , <i>k</i> <sub>max</sub> ; <i>l</i> <sub>min</sub> , <i>l</i> <sub>max</sub> | -15, 15; -6, 6; -14, 14             | -15, 15; 0, 8; 0, 14;               | -13, 13; -5, 3; -28, 27             | -8, 13; -3, 5; -25, 24              |
| No. of reflections                                                                                                                                        | 4852                                | 6185                                | 3888                                | 5336                                |
| No. of Observed Reflections                                                                                                                               | 1540                                | 1946                                | 1825                                | 1882                                |
| No. of unique reflections                                                                                                                                 | 1475                                | 1719                                | 1335                                | 1439                                |
| <i>R</i> (int)                                                                                                                                            | 0.0193                              | 0.0283                              | 0.0362                              | 0.0468                              |
| Data/restraints/parameters                                                                                                                                | 1540/0/181                          | 1946/0/181                          | 1825/0/145                          | 1882/0/145                          |
| Goodness-of-fit on <i>F</i> <sup>2</sup>                                                                                                                  | 1.056                               | 1.046                               | 1.027                               | 1.067                               |
| <i>R</i> <sub>obs</sub>                                                                                                                                   | 0.0257                              | 0.0234                              | 0.0452                              | 0.041                               |
| <i>wR</i> <sub>2</sub> (obs)                                                                                                                              | 0.0699                              | 0.0651                              | 0.1058                              | 0.0726                              |
| $\Delta\rho_{\text{min,max}} / \text{e } \text{\AA}^{-3}$                                                                                                 | 0.038/-0.192                        | 0.468/-0.338                        | 0.779/-0.294                        | 0.637/-0.656                        |

|                                           |                                                       |                                     |                                                       |                                     |
|-------------------------------------------|-------------------------------------------------------|-------------------------------------|-------------------------------------------------------|-------------------------------------|
| Identification code                       | 36F1                                                  | 36F2                                | 18F1                                                  | 18F2                                |
| Empirical formula                         | C <sub>13</sub> H <sub>9</sub> ClFN                   | C <sub>13</sub> H <sub>9</sub> ClFN | C <sub>13</sub> H <sub>9</sub> BrFN                   | C <sub>13</sub> H <sub>9</sub> BrFN |
| Formula weight                            | 233.66                                                | 233.66                              | 278.12                                                | 278.12                              |
| Temperature (K)                           | 100.0K                                                | 100.0K                              | 100.0K                                                | 100.0K                              |
| CCDC No.                                  | 904766                                                | 967465                              | 967460                                                | 967467                              |
| Solvent system                            | Acetone                                               | Methanol                            | Acetone +<br>Methanol                                 | DCM +<br>Hexane                     |
| Morphology                                | plate                                                 | needle                              | block                                                 | plate                               |
| Crystal system                            | orthorhombic                                          | orthorhombic                        | orthorhombic                                          | monoclinic                          |
| Space group                               | <i>P</i> 2 <sub>1</sub> 2 <sub>1</sub> 2 <sub>1</sub> | <i>P</i> na2 <sub>1</sub>           | <i>P</i> 2 <sub>1</sub> 2 <sub>1</sub> 2 <sub>1</sub> | <i>P</i> 2 <sub>1</sub>             |
| a/Å                                       | 6.182(2)                                              | 26.077(3)                           | 6.1982(5)                                             | 13.424(2)                           |
| b/Å                                       | 7.123(2)                                              | 5.8390(7)                           | 7.1066(7)                                             | 6.0702(6)                           |
| c/Å                                       | 25.074(8)                                             | 14.513(2)                           | 25.399(2)                                             | 15.467(2)                           |
| α/°                                       | 90.00                                                 | 90.00                               | 90.00                                                 | 90.00                               |
| β/°                                       | 90.00                                                 | 90.00                               | 90.00                                                 | 115.534(6)                          |
| γ/°                                       | 90.00                                                 | 90.00                               | 90.00                                                 | 90.00                               |
| Volume/Å <sup>3</sup>                     | 1104.1(6)                                             | 2209.78(4)                          | 1118.77(2)                                            | 1137.2(2)                           |
| Z                                         | 4                                                     | 8                                   | 4                                                     | 4                                   |
| Z'                                        | 1                                                     | 2                                   | 1                                                     | 1                                   |
| ρ <sub>calc</sub> /mg/mm <sup>3</sup>     | 1.406                                                 | 1.40                                | 1.65                                                  | 1.627                               |
| μ/mm <sup>-1</sup>                        | 0.328                                                 | 0.327                               | 3.656                                                 | 3.597                               |
| F(000)                                    | 480                                                   | 960                                 | 552                                                   | 552                                 |
| Crystal size/mm <sup>3</sup>              | 0.3 × 0.2 ×<br>0.1                                    | 0.3 × 0.1 ×<br>0.1                  | 0.2 × 0.2 ×<br>0.1                                    | 0.3 × 0.2 ×<br>0.15                 |
| Θ <sub>min, max</sub>                     | 2.97, 25.02°                                          | 2.10, 26.40°                        | 1.60, 25.00°                                          | 1.46, 25.68°                        |
| hmin, hmax; kmin,<br>kmax; lmin, lmax     | -7, 7; -7, 8; -<br>12, 29                             | -32, 28; -7, 7;<br>-18, 18          | -7, 7; -8, 8; -<br>30, 29                             | -16, 13; -7, 6;<br>-18, 18          |
| No. of reflections                        | 3797                                                  | 8743                                | 5888                                                  | 7418                                |
| No. of Observed<br>Reflections            | 1927                                                  | 2870                                | 1754                                                  | 3850                                |
| No. of unique<br>reflections              | 1776                                                  | 3643                                | 1987                                                  | 3422                                |
| R(int)                                    | 0.0193                                                | 0.045                               | 0.042                                                 | 0.0368                              |
| Data/restraints/par<br>ameters            | 1927/0/181                                            | 3643/0/289                          | 1927/0/145                                            | 3850/1/289                          |
| Goodness-of-fit on<br>F <sup>2</sup>      | 1.046                                                 | 1.041                               | 0.957                                                 | 1.074                               |
| R <sub>obs</sub>                          | 0.0267                                                | 0.042                               | 0.027                                                 | 0.047                               |
| wR <sub>2</sub> (obs)                     | 0.0595                                                | 0.087                               | 0.049                                                 | 0.0997                              |
| Δρ <sub>min,max</sub> / e Å <sup>-3</sup> | 0.165/-0.143                                          | 0.229/-0.300                        | 0.461/-0.444                                          | 0.608/ -0.659                       |

|                                                           |                                     |                                                       |                                     |                                     |                                     |
|-----------------------------------------------------------|-------------------------------------|-------------------------------------------------------|-------------------------------------|-------------------------------------|-------------------------------------|
| Identification code                                       | 46                                  | 28F1                                                  | 28F2                                | 37                                  | 19                                  |
| Empirical formula                                         | C <sub>13</sub> H <sub>9</sub> ClFN | C <sub>13</sub> H <sub>9</sub> BrFN                   | C <sub>13</sub> H <sub>9</sub> BrFN | C <sub>13</sub> H <sub>9</sub> ClFN | C <sub>13</sub> H <sub>9</sub> BrFN |
| Formula weight                                            | 233.66                              | 278.12                                                | 278.12                              | 233.66                              | 278.12                              |
| Temperature (K)                                           | 100.0K                              | 100.0K                                                | 100.0K                              | 100.0K                              | 100.0K                              |
| CCDC No.                                                  | 904774                              | 904761                                                | 967463                              | 904767                              | 904755                              |
| Solvent system                                            | Acetone                             | Acetone + Methanol                                    | DCM + Hexane                        | Ethyl Acetate                       | Methanol                            |
| Morphology                                                | block                               | rect. Prism                                           | block                               | plate                               | plate                               |
| Crystal system                                            | monoclinic                          | orthorhombic                                          | monoclinic                          | monoclinic                          | monoclinic                          |
| Space group                                               | <i>P</i> 2 <sub>1</sub>             | <i>P</i> 2 <sub>1</sub> 2 <sub>1</sub> 2 <sub>1</sub> | <i>P</i> 2 <sub>1</sub>             | <i>P</i> 2 <sub>1</sub> / <i>c</i>  | <i>P</i> 2 <sub>1</sub> / <i>c</i>  |
| <i>a</i> /Å                                               | 8.371(1)                            | 3.9096(7)                                             | 8.4843(3)                           | 24.330(6)                           | 24.639(3)                           |
| <i>b</i> /Å                                               | 5.8235(6)                           | 10.202(2)                                             | 5.8153(2)                           | 6.156(2)                            | 6.1809(6)                           |
| <i>c</i> /Å                                               | 11.239(1)                           | 27.608(6)                                             | 11.3383(5)                          | 7.129(2)                            | 7.2279(7)                           |
| $\alpha$ /°                                               | 90.00                               | 90.00                                                 | 90                                  | 90.00                               | 90.00                               |
| $\beta$ /°                                                | 95.359(4)                           | 90.00                                                 | 94.559(2)                           | 96.144(3)                           | 96.537(5)                           |
| $\gamma$ /°                                               | 90.00                               | 90.00                                                 | 90                                  | 90.00                               | 90.00                               |
| Volume/Å <sup>3</sup>                                     | 545.5(1)                            | 1101.11(3)                                            | 557.65(4)                           | 1054.5(1)                           | 1093.6(2)                           |
| <i>Z</i>                                                  | 2                                   | 4                                                     | 2                                   | 4                                   | 4                                   |
| <i>Z'</i>                                                 | 0.5                                 | 1                                                     | 1                                   | 1                                   | 1                                   |
| $\rho_{\text{calc}}$ /mg/mm <sup>3</sup>                  | 1.423                               | 1.678                                                 | 1.656                               | 1.462                               | 1.689                               |
| $\mu$ /mm <sup>-1</sup>                                   | 0.332                               | 3.715                                                 | 3.668                               | 0.341                               | 3.741                               |
| <i>F</i> (000)                                            | 240                                 | 552                                                   | 552                                 | 480                                 | 552                                 |
| Crystal size/mm <sup>3</sup>                              | 0.4 × 0.3 × 0.2                     | 0.2 × 0.2 × 0.1                                       | 0.4 × 0.2 × 0.2                     | 0.5 × 0.3 × 0.2                     | 0.2 × 0.1 × 0.1                     |
| $\Theta_{\text{min, max}}$                                | 2.44, 25.03°                        | 2.13, 25.02°                                          | 3.12, 32.74°                        | 2.53, 25.02°                        | 2.5, 24.71°                         |
| hmin, hmax; kmin, kmax; lmin, lmax                        | -9, 9; -6, 6; -13, 13               | -4, 4; 0, 12; -15, 32                                 | -10, 10; -7, 5; -11, 14             | -21, 28; -7, 2; -8, 6               | -28, 28; -7, 5; -8, 7               |
| No. of reflections                                        | 3114                                | 4619                                                  | 2988                                | 4982                                | 6660                                |
| No. of Observed Reflections                               | 1610                                | 1913                                                  | 1817                                | 1863                                | 1851                                |
| No. of unique reflections                                 | 1578                                | 1769                                                  | 1757                                | 1743                                | 1686                                |
| <i>R</i> (int)                                            | 0.0141                              | 0.0196                                                | 0.0159                              | 0.014                               | 0.0318                              |
| Data/restraints/parameters                                | 1610/0/181                          | 1913/0/177                                            | 1817/1/145                          | 1863/0/181                          | 1851/0/145                          |
| Goodness-of-fit on <i>F</i> <sup>2</sup>                  | 1.086                               | 1.062                                                 | 1.028                               | 1.065                               | 1.044                               |
| <i>R</i> <sub>obs</sub>                                   | 0.0212                              | 0.0236                                                | 0.0191                              | 0.0289                              | 0.0259                              |
| <i>wR</i> <sub>2</sub> (obs)                              | 0.0536                              | 0.0525                                                | 0.0463                              | 0.0791                              | 0.0700                              |
| $\Delta\rho_{\text{min,max}} / \text{e } \text{\AA}^{-3}$ | 0.114/ -0.177                       | 0.41/-0.25                                            | 0.257/-0.278                        | 0.319/-0.26                         | 0.725/-0.368                        |

|                                                                                    |                                                       |                                                       |
|------------------------------------------------------------------------------------|-------------------------------------------------------|-------------------------------------------------------|
| Identification code                                                                | 39                                                    | 21                                                    |
| Empirical formula                                                                  | C <sub>13</sub> H <sub>9</sub> ClFN                   | C <sub>13</sub> H <sub>9</sub> BrFN                   |
| Formula weight                                                                     | 233.66                                                | 278.12                                                |
| Temperature (K)                                                                    | 100.0K                                                | 100.0K                                                |
| CCDC No.                                                                           | 904768                                                | 967461                                                |
| Solvent system                                                                     | Ethanol                                               | Acetone                                               |
| Morphology                                                                         | block                                                 | block                                                 |
| Crystal system                                                                     | orthorhombic                                          | orthorhombic                                          |
| Space group                                                                        | <i>P</i> 2 <sub>1</sub> 2 <sub>1</sub> 2 <sub>1</sub> | <i>P</i> 2 <sub>1</sub> 2 <sub>1</sub> 2 <sub>1</sub> |
| <i>a</i> /Å                                                                        | 6.1450(1)                                             | 6.1317(4)                                             |
| <i>b</i> /Å                                                                        | 12.8880(3)                                            | 13.1483(8)                                            |
| <i>c</i> /Å                                                                        | 13.6233(3)                                            | 13.8815(9)                                            |
| $\alpha$ /°                                                                        | 90.00                                                 | 90                                                    |
| $\beta$ /°                                                                         | 90.00                                                 | 90                                                    |
| $\gamma$ /°                                                                        | 90.00                                                 | 90                                                    |
| Volume/Å <sup>3</sup>                                                              | 1078.92(4)                                            | 1119.2(2)                                             |
| <i>Z</i>                                                                           | 4                                                     | 4                                                     |
| <i>Z'</i>                                                                          | 1                                                     | 1                                                     |
| $\rho_{\text{calc}}$ /mm <sup>3</sup>                                              | 1.438                                                 | 1.651                                                 |
| $\mu$ /mm <sup>-1</sup>                                                            | 0.335                                                 | 3.655                                                 |
| <i>F</i> (000)                                                                     | 480                                                   | 552                                                   |
| Crystal size/mm <sup>3</sup>                                                       | 0.2 × 0.1 × 0.1                                       | 0.2 × 0.2 × 0.1                                       |
| $\Theta_{\text{min, max}}$                                                         | 2.18, 25.02°                                          | 2.13, 28.28                                           |
| <i>h</i> min, <i>h</i> max; <i>k</i> min, <i>k</i> max; <i>l</i> min, <i>l</i> max | -7, 7; -15, 11; -16, 13                               | -8, 5; -16, 17; -17, 18                               |
| No. of reflections                                                                 | 7193                                                  | 6479                                                  |
| No. of Observed Reflections                                                        | 1897                                                  | 2768                                                  |
| No. of unique reflections                                                          | 1871                                                  | 2547                                                  |
| <i>R</i> (int)                                                                     | 0.0161                                                | 0.0307                                                |
| Data/restraints/parameters                                                         | 1897/0/181                                            | 2768/0/145                                            |
| Goodness-of-fit on <i>F</i> <sup>2</sup>                                           | 1.046                                                 | 0.992                                                 |
| <i>R</i> <sub>obs</sub>                                                            | 0.0203                                                | 0.0269                                                |
| <i>wR</i> <sub>2</sub> (obs)                                                       | 0.0525                                                | 0.0547                                                |
| $\Delta\rho_{\text{min,max}} / \text{e Å}^{-3}$                                    | 0.161/ -0.14                                          | 0.41/-0.604                                           |

|                                                                                    |                                     |                                     |                                     |                                     |
|------------------------------------------------------------------------------------|-------------------------------------|-------------------------------------|-------------------------------------|-------------------------------------|
| Identification code                                                                | 49                                  | 31                                  | 40                                  | 22                                  |
| Empirical formula                                                                  | C <sub>13</sub> H <sub>9</sub> ClFN | C <sub>13</sub> H <sub>9</sub> BrFN | C <sub>13</sub> H <sub>9</sub> ClFN | C <sub>13</sub> H <sub>9</sub> BrFN |
| Formula weight                                                                     | 233.66                              | 278.12                              | 233.66                              | 278.12                              |
| Temperature (K)                                                                    | 100.0K                              | 100.0K                              | 100.0K                              | 100.0K                              |
| CCDC No.                                                                           | 904775                              | 904762                              | 904769                              | 967462                              |
| Solvent system                                                                     | Ethanol                             | Acetone                             | DCM + Hexane                        | Ethyl Acetate                       |
| Morphology                                                                         | rectangular                         | block                               | irregular                           | needle                              |
| Crystal system                                                                     | monoclinic                          | monoclinic                          | monoclinic                          | monoclinic                          |
| Space group                                                                        | <i>P</i> 2 <sub>1</sub> / <i>c</i>  |
| <i>a</i> /Å                                                                        | 13.129(1)                           | 13.4031(9)                          | 3.8515(8)                           | 3.8890(4)                           |
| <i>b</i> /Å                                                                        | 11.0236(8)                          | 11.0048(9)                          | 25.069(6)                           | 24.937(3)                           |
| <i>c</i> /Å                                                                        | 7.6940(6)                           | 7.7272(7)                           | 10.864(2)                           | 11.0177(10)                         |
| $\alpha$ /°                                                                        | 90.00                               | 90.00                               | 90.00                               | 90.00                               |
| $\beta$ /°                                                                         | 106.445(5)                          | 106.161(4)                          | 93.302(3)                           | 93.160(5)                           |
| $\gamma$ /°                                                                        | 90.00                               | 90.00                               | 90.00                               | 90.00                               |
| Volume/Å <sup>3</sup>                                                              | 1068.0(1)                           | 1094.7(2)                           | 1047.2(4)                           | 1066.9(2)                           |
| <i>Z</i>                                                                           | 4                                   | 4                                   | 4                                   | 4                                   |
| <i>Z'</i>                                                                          | 1                                   | 1                                   | 1                                   | 1                                   |
| $\rho_{\text{calc}}$ /mg/mm <sup>3</sup>                                           | 1.453                               | 1.688                               | 1.482                               | 1.732                               |
| $\mu$ /mm <sup>-1</sup>                                                            | 0.339                               | 3.737                               | 0.345                               | 3.834                               |
| <i>F</i> (000)                                                                     | 480                                 | 552.0                               | 480                                 | 552                                 |
| Crystal size/mm <sup>3</sup>                                                       | 0.4 × 0.2 × 0.1                     | 0.3 × 0.2 × 0.1                     | 0.2 × 0.2 × 0.1                     | 0.3 × 0.1 × 0.1                     |
| $\Theta_{\text{min, max}}$                                                         | 2.46, 26.37°                        | 2.43, 25.02                         | 1.62, 25.12°                        | 2.02, 25.02                         |
| <i>h</i> min, <i>h</i> max; <i>k</i> min, <i>k</i> max; <i>l</i> min, <i>l</i> max | -12, 16; -13, 13; -9, 7             | -15, 15; -13, 10; -9, 8;            | -4, 4; -29, 29; -12, 11             | -4, 2; -29, 28; -13, 12             |
| No. of reflections                                                                 | 9936                                | 5574                                | 5691                                | 5135                                |
| No. of Observed Reflections                                                        | 2186                                | 1779                                | 1874                                | 1875                                |
| No. of unique reflections                                                          | 1844                                | 1925                                | 1705                                | 1616                                |
| <i>R</i> (int)                                                                     | 0.0439                              | 0.0181                              | 0.0184                              | 0.0262                              |
| Data/restraints/parameters                                                         | 2186/0/181                          | 1925/0/181                          | 1874/0/181                          | 1875/1/145                          |
| Goodness-of-fit on <i>F</i> <sup>2</sup>                                           | 1.077                               | 1.038                               | 1.12                                | 1.036                               |
| <i>R</i> <sub>obs</sub>                                                            | 0.0372                              | 0.0209                              | 0.03                                | 0.0254                              |
| <i>wR</i> <sub>2</sub> (obs)                                                       | 0.09                                | 0.0526                              | 0.0783                              | 0.0602                              |
| $\Delta\rho_{\text{min, max}}$ / e Å <sup>-3</sup>                                 | 0.283/ -0.312                       | 0.38/-0.38                          | 0.254/-0.304                        | 1.025/-0.436                        |

|                                                                                    |                                     |                                     |                                                       |                                                       |
|------------------------------------------------------------------------------------|-------------------------------------|-------------------------------------|-------------------------------------------------------|-------------------------------------------------------|
| Identification code                                                                | 50                                  | 32                                  | 41                                                    | 23                                                    |
| Empirical formula                                                                  | C <sub>13</sub> H <sub>9</sub> ClFN | C <sub>13</sub> H <sub>9</sub> BrFN | C <sub>13</sub> H <sub>9</sub> ClFN                   | C <sub>13</sub> H <sub>9</sub> BrFN                   |
| Formula weight                                                                     | 233.66                              | 278.12                              | 233.66                                                | 278.12                                                |
| Temperature (K)                                                                    | 100.0K                              | 100.0K                              | 100.0K                                                | 100.0K                                                |
| CCDC No.                                                                           | 904776                              | 904763                              | 904770                                                | 904757                                                |
| Solvent system                                                                     | Ethanol                             | Acetone                             | Hexane                                                | Methanol                                              |
| Morphology                                                                         | block                               | plate                               | irregular                                             | irregular                                             |
| Crystal system                                                                     | monoclinic                          | monoclinic                          | orthorhombic                                          | orthorhombic                                          |
| Space group                                                                        | <i>P</i> 2 <sub>1</sub> / <i>c</i>  | <i>P</i> 2 <sub>1</sub> / <i>c</i>  | <i>P</i> 2 <sub>1</sub> 2 <sub>1</sub> 2 <sub>1</sub> | <i>P</i> 2 <sub>1</sub> 2 <sub>1</sub> 2 <sub>1</sub> |
| <i>a</i> /Å                                                                        | 15.377(5)                           | 15.490(1)                           | 3.8567(2)                                             | 3.9037(9)                                             |
| <i>b</i> /Å                                                                        | 3.925 (1)                           | 3.9477(2)                           | 12.0890(8)                                            | 12.190(3)                                             |
| <i>c</i> /Å                                                                        | 22.648(8)                           | 24.348 (2)                          | 22.859(2)                                             | 22.760(5)                                             |
| $\alpha$ /°                                                                        | 90                                  | 90.00                               | 90.00                                                 | 90                                                    |
| $\beta$ /°                                                                         | 129.569(9)                          | 133.511(3)                          | 90.00                                                 | 90                                                    |
| $\gamma$ /°                                                                        | 90                                  | 90.00                               | 90.00                                                 | 90                                                    |
| Volume/Å <sup>3</sup>                                                              | 1053.8(6)                           | 1079.8 (1)                          | 1065.8(1)                                             | 1083.03(4)                                            |
| <i>Z</i>                                                                           | 4                                   | 4                                   | 4                                                     | 4                                                     |
| <i>Z'</i>                                                                          | 1                                   | 1                                   | 1                                                     | 1                                                     |
| $\rho_{\text{calc}}$ /mg/mm <sup>3</sup>                                           | 1.473                               | 1.711                               | 1.456                                                 | 1.71                                                  |
| $\mu$ /mm <sup>-1</sup>                                                            | 0.343                               | 3.788                               | 0.339                                                 | 3.777                                                 |
| <i>F</i> (000)                                                                     | 480                                 | 552                                 | 480                                                   | 552                                                   |
| Crystal size/mm <sup>3</sup>                                                       | 0.2 × 0.1 × 0.1                     | 0.2 × 0.1 × 0.05                    | 0.5 × 0.2 × 0.1                                       | 0.4 × 0.2 × 0.1                                       |
| $\Theta_{\text{min, max}}$                                                         | 1.72, 26.37°                        | 1.81, 25.02°                        | 1.78, 25.02°                                          | 2.9, 25.03°                                           |
| <i>h</i> min, <i>h</i> max; <i>k</i> min, <i>k</i> max; <i>l</i> min, <i>l</i> max | -19, 19; -4, 4; -27, 28             | -17, 18; -4, 4; -28, 28;            | -7, 7; -7, 8; -12, 29                                 | -3, 4; -14, 14; -24, 27                               |
| No. of reflections                                                                 | 6284                                | 7459                                | 7013                                                  | 4097                                                  |
| No. of Observed Reflections                                                        | 2139                                | 1798                                | 1859                                                  | 1926                                                  |
| No. of unique reflections                                                          | 1861                                | 1915                                | 1748                                                  | 1892                                                  |
| <i>R</i> (int)                                                                     | 0.0254                              | 0.0203                              | 0.0256                                                | 0.0130                                                |
| Data/restraints/parameters                                                         | 2139/0/181                          | 1915/0/181                          | 1859/0/175                                            | 1926/0/175                                            |
| Goodness-of-fit on <i>F</i> <sup>2</sup>                                           | 1.054                               | 1.059                               | 1.085                                                 | 1.046                                                 |
| <i>R</i> <sub>obs</sub>                                                            | 0.029                               | 0.0192                              | 0.0273                                                | 0.0243                                                |
| <i>wR</i> <sub>2</sub> (obs)                                                       | 0.0712                              | 0.0483                              | 0.0639                                                | 0.0627                                                |
| $\Delta\rho_{\text{min,max}} / \text{e Å}^{-3}$                                    | 0.281/-0.228                        | 0.313/-0.264                        | 0.039/ -0.238                                         | 0.21/-0.27                                            |

|                                                                                       |                                     |                                     |                                     |                                     |
|---------------------------------------------------------------------------------------|-------------------------------------|-------------------------------------|-------------------------------------|-------------------------------------|
| Identification code                                                                   | 51                                  | 33                                  | 42                                  | 24                                  |
| Empirical formula                                                                     | C <sub>13</sub> H <sub>9</sub> ClFN | C <sub>13</sub> H <sub>9</sub> BrFN | C <sub>13</sub> H <sub>9</sub> ClFN | C <sub>13</sub> H <sub>9</sub> BrFN |
| Formula weight                                                                        | 233.66                              | 278.12                              | 233.66                              | 278.12                              |
| Temperature (K)                                                                       | 100.0K                              | 100.0K                              | 100.0K                              | 100.0K                              |
| CCDC No.                                                                              | 967466                              | 904764                              | 904771                              | 904758                              |
| Solvent system                                                                        | Methanol                            | Acetone                             | Ethanol                             | Methanol                            |
| Morphology                                                                            | plate                               | block                               | block                               | plate                               |
| Crystal system                                                                        | monoclinic                          | orthorhombic                        | orthorhombic                        | monoclinic                          |
| Space group                                                                           | <i>P</i> 2 <sub>1</sub> / <i>c</i>  | <i>Pbcn</i>                         | <i>Pbca</i>                         | <i>P</i> 2 <sub>1</sub> / <i>c</i>  |
| <i>a</i> /Å                                                                           | 10.030(4)                           | 12.9933(6)                          | 12.4117(3)                          | 12.112(2)                           |
| <i>b</i> /Å                                                                           | 3.8427(15)                          | 11.4999(5)                          | 9.8248(2)                           | 3.9009(7)                           |
| <i>c</i> /Å                                                                           | 28.062(11)                          | 14.9358(7)                          | 17.9456(4)                          | 23.337(5)                           |
| $\alpha$ /°                                                                           | 90                                  | 90.00                               | 90.00                               | 90.00                               |
| $\beta$ /°                                                                            | 90.806(8)                           | 90.00                               | 90.00                               | 104.714(4)                          |
| $\gamma$ /°                                                                           | 90                                  | 90.00                               | 90.00                               | 90.00                               |
| Volume/Å <sup>3</sup>                                                                 | 1081.4(7)                           | 2231.7(2)                           | 2188.33(8)                          | 1066.5(4)                           |
| <i>Z</i>                                                                              | 4                                   | 8                                   | 8                                   | 4                                   |
| <i>Z'</i>                                                                             | 1                                   | 1                                   | 2                                   | 1                                   |
| $\rho_{\text{calc}}$ /mg/mm <sup>3</sup>                                              | 1.435                               | 1.656                               | 1.418                               | 1.732                               |
| $\mu$ /mm <sup>-1</sup>                                                               | 0.334                               | 3.666                               | 0.331                               | 3.835                               |
| <i>F</i> (000)                                                                        | 480                                 | 1104                                | 960                                 | 552                                 |
| Crystal size/mm <sup>3</sup>                                                          | 0.4 × 0.2 × 0.1                     | 0.2 × 0.2 × 0.1                     | 0.4 × 0.2 × 0.1                     | 0.2 × 0.15 × 0.1                    |
| $\Theta_{\text{min, max}}$                                                            | 2.03, 25.03                         | 2.73,<br>27.79°                     | 2.27, 26.37°                        | 2.16, 25.03                         |
| <i>h</i> min, <i>h</i> max; <i>k</i> min, <i>k</i> max;<br><i>l</i> min, <i>l</i> max | -5, 11; -4, 4; -32,<br>33           | -7, 15; -13, 13; -<br>17, 16;       | -15, 7; -11, 12; -<br>20, 22        | -14, 12; -4, 2; -<br>27, 25         |
| No. of reflections                                                                    | 6584                                | 12745                               | 11432                               | 6185                                |
| No. of Observed<br>Reflections                                                        | 1909                                | 1712                                | 2235                                | 1873                                |
| No. of unique reflections                                                             | 1640                                | 1973                                | 1979                                | 1658                                |
| <i>R</i> (int)                                                                        | 0.0221                              | 0.0274                              | 0.018                               | 0.0283                              |
| Data/restraints/parameters                                                            | 1909/0/157                          | 1973/13/157                         | 2235/0/181                          | 1873/0/177                          |
| Goodness-of-fit on <i>F</i> <sup>2</sup>                                              | 1.043                               | 1.058                               | 1.039                               | 1.051                               |
| <i>R</i> <sub>obs</sub>                                                               | 0.0364                              | 0.0236                              | 0.0279                              | 0.0245                              |
| <i>wR</i> <sub>2</sub> (obs)                                                          | 0.0837                              | 0.0513                              | 0.0735                              | 0.0598                              |
| $\Delta\rho_{\text{min,max}} / \text{e } \text{\AA}^{-3}$                             | 0.244/-0.344                        | 0.260/-0.316                        | 0.261/-0.273                        | 0.514/-0.399                        |

## Structural description of the compounds belonging to class 1a and 1c:

### 4-chloro-N-(4-fluorobenzylidene)aniline (**43**):

Compound **43** crystallizes in the centrosymmetric triclinic  $P\bar{1}$  space group with  $Z = 4$  and having two molecules in the asymmetric unit ( $Z' = 2$ ). The molecules have been found to form hexameric network involving two different C–H...F hydrogen bonds (one between F1 and H26 and the other between F2 and H13) and a type I C–Cl...Cl–C interactions (table 1, figure 1b). Further, a number of weak C–H... $\pi$  interactions, which interconnect these molecules, have been found in the lattice (table S1a, figure S1a and S1b).

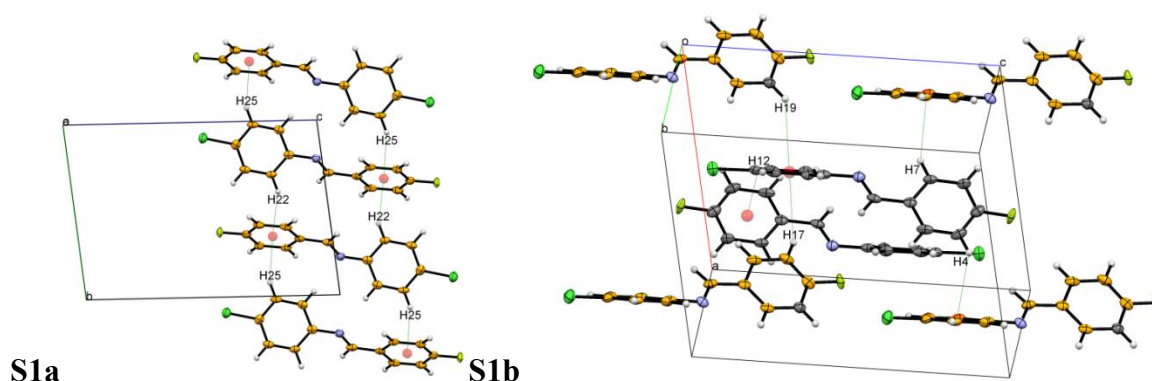

**Figure S1:** (a) Chains of dimers through C–H... $\pi$  interactions in **43**, (b) formation of network through C–H... $\pi$  interactions present in **43**.

### 4-bromo-N-(4-fluorobenzylidene)aniline (**25**):

Compound **25** was found to crystallize in the monoclinic centrosymmetric  $P2_1/c$  space group with  $Z = 12$  and having three molecules in the asymmetric unit. All the three molecules of the asymmetric unit pack in the lattice through type I C–F...Br interaction, which results in the formation of chains in the  $bc$  plane. These chains are interlinked with each other through C–H... $\pi$  interactions (table 1, figure 1c). Three molecules of the asymmetric unit have also been found to interact with each other through weak C–H...N and C–H...Br hydrogen bonds (involving H9 with N1, H23 with N3, H17 with N1 and H38 with Br1) (table 1, figure S1c). These interactions (C–H...N and C–H...Br) are also further supported by C–H... $\pi$  interactions (ESI, table S1, figure S1c).



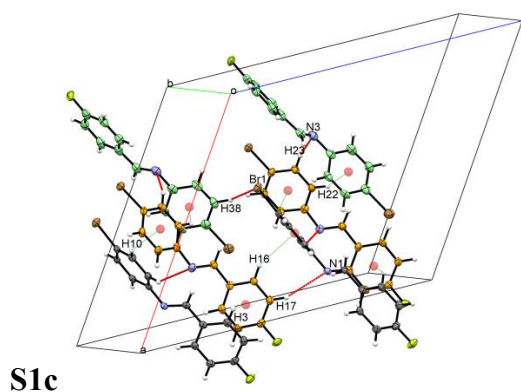

**Figure S1: (c)** Molecules connected by C–H···N, C–H···Br hydrogen bonds and C–H··· $\pi$  interactions in **25**.

**4-fluoro-N-(4-chlorobenzylidene)aniline (34)** and **4-fluoro-N-(4-bromobenzylidene)aniline (16 Form I, 16F1):**

Compounds **34** and **16F1** (Polymorph 1 of **16**) have been found to crystallize in the monoclinic centrosymmetric  $P2_1/c$  space group with  $Z = 4$ , while **16F2** (Polymorph 2 of **16**) was crystallized in the non-centrosymmetric orthorhombic  $Pna2_1$  space group with  $Z = 8$  and  $Z' = 2$ . Compounds **34** and **16F1** have been found to be isostructural with similar packing characteristics as described below.

Both the structures, when viewed down the  $c$ -axis, were found to have zigzag molecular chains through C–H···F hydrogen bonds (involving H12 with F1) in the  $ab$  plane by the utilization of  $2_1$  screws along  $b$ -axis. These chains have been found to run antiparallel along the  $b$  axis (table 1, figure 1d and 1e). A pair of antiparallel chains are found to be further interconnected by the formation of dimers by the molecules related by inversion center through C–H···Cl hydrogen bonds in case of **34** (table 1, figure 1d) and by type I C–Br···Br–C interactions in case of **16F1** (table 1, figure 1e), thus results in the formation of sheets in the  $ab$  plane. The homohalogen interactions found in **16F1** are in contrast to the observation made by Nayak *et al.*, in the cases of fluorinated benzenanilides, in which preference for type II geometry for homo/hetero halogen short contacts involving heavier halogens (Br and Cl) in the solid state have been revealed. The sheets thus formed have been found to interact with other sheets in the lattice through weak C–H··· $\pi$  interactions (involving H3 and H6 with Cg1, H13 and H10 with Cg2) (ESI, table S1, figure S1d, S1e, S1f and S1g).

The C–H···F chains found in this molecule are similar to those observed in the case of 4-fluoro-N-(4-fluorobenzylidene)aniline reported by us earlier.\* In the earlier case as

fluorine was there at the para position on both the phenyl rings, both the fluorine atoms were found to be involved in the formation of chains by C–H $\cdots$ F hydrogen bond and no F $\cdots$ F contact was found.

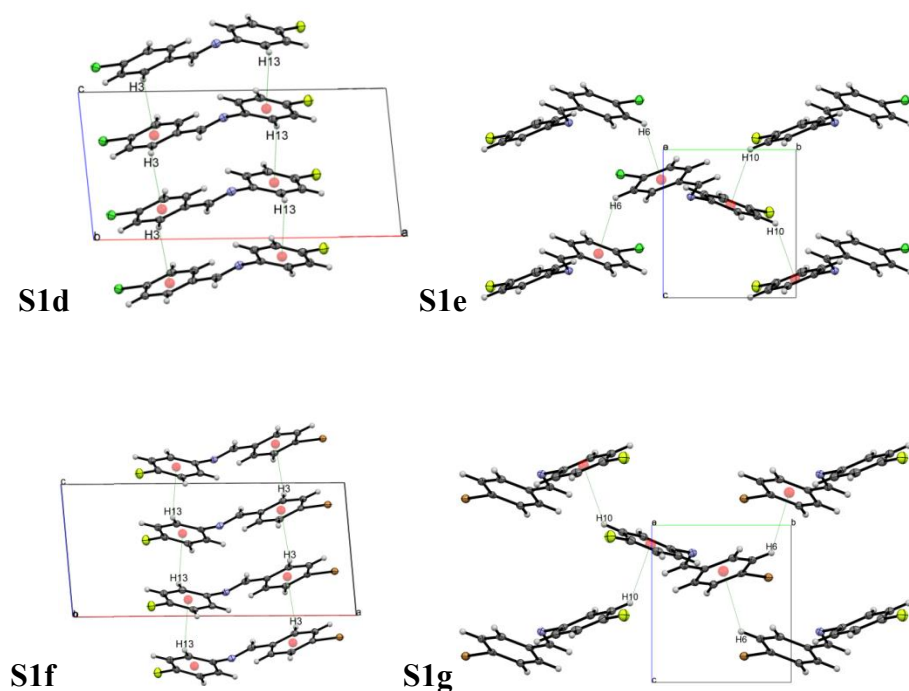

**Figure S1:** (d) Chains of dimers formed by C–H $\cdots$  $\pi$  interactions along *b*-axis in **34**, (e) formation of molecular network *via* C–H $\cdots$  $\pi$  interactions in **34**, (f) Chains of dimers formed by C–H $\cdots$  $\pi$  interactions along *b*-axis in **16F1**, (g) formation of molecular network *via* C–H $\cdots$  $\pi$  interactions in **16F1**.

#### 4-fluoro-N-(4-bromobenzylidene)aniline (**16 Form II**, **16F2**):

Compound **16F2** has been found to crystallize in the non-centrosymmetric orthorhombic *Pna*2<sub>1</sub> space group with *Z* = 8 and *Z'* = 2. A network of chains has been found to form through weak C–H $\cdots$ F hydrogen bonds in both the molecules of the asymmetric unit (involving H14 with F2 and H1 with F1). Then C–H $\cdots$ Br (involving H23 with Br1) hydrogen bonds between the two molecules of the asymmetric unit have been found to interconnect these chains to form sheets (table 1, figure 1f). These sheets have been found to propagate along *c*-axis through weak C–H $\cdots$  $\pi$  (ESI, table S1, figure S1h).

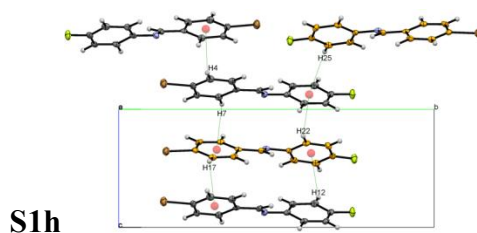

**Figure S1: (h)** Molecules interacting *via* C–H $\cdots\pi$  interactions along *c*-axis.

**Table S1:** Intermolecular C–H $\cdots\pi$  interactions metrics for compounds **43**, **25**, **34**, **16F1** and **16F2**

| Code | C–H $\cdots\pi$      | C $\cdots\pi$<br>(Å) | H $\cdots\pi$<br>(Å) | $\angle$ C–H $\cdots\pi$<br>(°) | Symmetry<br>Code |
|------|----------------------|----------------------|----------------------|---------------------------------|------------------|
| 43   | C4–H4 $\cdots$ Cg4   | 3.46                 | 2.78                 | 129                             | x,y,1+z          |
|      | C7–H7 $\cdots$ Cg4   | 3.40                 | 2.68                 | 133                             | -1+x,y,1+z       |
|      | C10–H10 $\cdots$ Cg1 | 3.67                 | 2.96                 | 133                             | 1-x,-y,1-z       |
|      | C12–H12 $\cdots$ Cg1 | 3.59                 | 2.88                 | 132                             | 1-x,1-y,1-z      |
|      | C17–H17 $\cdots$ Cg2 | 3.50                 | 2.92                 | 121                             | x,y,z            |
|      | C19–H19 $\cdots$ Cg2 | 3.69                 | 2.96                 | 135                             | 1+x,y,z          |
|      | C22–H22 $\cdots$ Cg3 | 3.42                 | 2.74                 | 130                             | 2-x,1-y,-z       |
|      | C25–H25 $\cdots$ Cg3 | 3.49                 | 2.77                 | 133                             | 2-x,-y,-z        |
| 25   | C3–H3 $\cdots$ Cg3   | 3.44                 | 2.78                 | 127                             | x,1/2-y,1/2+z    |
|      | C10–H10 $\cdots$ Cg4 | 3.56                 | 2.75                 | 143                             | x,1/2-y,1/2+z    |
|      | C12–H12 $\cdots$ Cg6 | 3.41                 | 2.73                 | 129                             | 1-x,-y,1-z       |
|      | C30–H30 $\cdots$ Cg1 | 3.44                 | 2.86                 | 120                             | 1-x,-y,1-z       |
|      | C16–H16 $\cdots$ Cg2 | 3.55                 | 2.68                 | 151                             | x,y,z            |
|      | C22–H22 $\cdots$ Cg6 | 3.59                 | 2.89                 | 132                             | x,1/2-y,-1/2+z   |
|      | C36–H36 $\cdots$ Cg2 | 3.55                 | 2.97                 | 121                             | x,y,z            |
| 34   | C3–H3 $\cdots$ Cg1   | 3.69                 | 2.98                 | 133                             | x,1/2-y,-1/2+z   |
|      | C13–H13 $\cdots$ Cg2 | 3.63                 | 2.94                 | 131                             | x,1/2-y,-1/2+z   |
|      | C6–H6 $\cdots$ Cg1   | 3.50                 | 2.85                 | 126                             | x,-1/2-y,1/2+z   |
|      | C10–H10 $\cdots$ Cg2 | 3.51                 | 2.82                 | 130                             | x,3/2-y,1/2+z    |
| 16F1 | C6–H6 $\cdots$ Cg1   | 3.55                 | 2.90                 | 126                             | x,5/2-y,1/2+z    |
|      | C10–H10 $\cdots$ Cg2 | 3.54                 | 2.84                 | 131                             | x,1/2-y,1/2+z    |
|      | C13–H13 $\cdots$ Cg2 | 3.68                 | 2.98                 | 132                             | x,1/2-y, 1/2+z   |
|      | C3–H3 $\cdots$ Cg1   | 3.73                 | 3.06                 | 133                             | x,1/2-y, 1/2+z   |
| 16F2 | C4–H4 $\cdots$ Cg1   | 3.45                 | 2.76                 | 138                             | 2-x,-y,-/2+z     |
|      | C7–H7 $\cdots$ Cg3   | 3.59                 | 2.93                 | 128                             | x,y,z            |
|      | C12–H12 $\cdots$ Cg4 | 3.50                 | 2.84                 | 127                             | x,y,-1+z         |
|      | C17–H17 $\cdots$ Cg1 | 3.36                 | 2.73                 | 124                             | x,y,1+z          |
|      | C22–H22 $\cdots$ Cg2 | 3.42                 | 2.69                 | 134                             | x,y,z            |
|      | C25–H25 $\cdots$ Cg2 | 3.58                 | 2.84                 | 135                             | -1/2+x,1/2-y,1+z |

**Structural description of the compounds belonging to class 1b and 5a:**

**3-chloro-N-(4-fluorobenzylidene)aniline (44)** and **3-bromo-N-(4-fluorobenzylidene)aniline (26)**

Both the compounds **44** and **26** were found to crystallize in the monoclinic centrosymmetric  $P2_1/c$  space group with  $Z = 4$  with similar unit cell dimensions. These compounds are isostructural and have similar packing features as described below.

Molecules related by  $c$  glide have been found to interact through weak C–H $\cdots$ F hydrogen bond, which resulted into the formation of chains in both. Then these chains were found to be interconnected through type II C–F $\cdots$ X (X = Cl or Br) hetero halogen interactions in **44** and **26** respectively and thus giving rise to a sheet like structure in the  $ac$  plane (table 2, figure 2b and 2c). On viewing down the  $bc$  plane, molecules having a center of symmetry have been found to interact by forming dimers through weak C–H $\cdots$  $\pi$  interaction (involving H6 with Cg2). Then these dimers have been found to extend by the utilization of  $2_1$  screw along  $b$ -axis through another weak C–H $\cdots$  $\pi$  interaction (involving H1 with Cg1) (ESI, table S2, figure S2a and S2b).

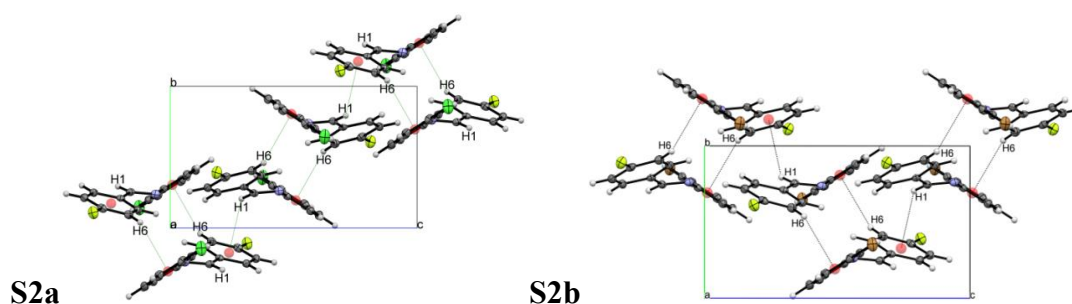

**Figure S2:** (a) Extension of molecular dimers, formed by C–H $\cdots$  $\pi$  interactions, through C–H $\cdots$  $\pi$  interaction in **44**, (b) Extending molecular dimers, formed by C–H $\cdots$  $\pi$  interactions, through C–H $\cdots$  $\pi$  interaction in **26**.

**3-fluoro-N-(4-chlorobenzylidene)aniline (35)** and **3-fluoro-N-(4-bromobenzylidene)aniline (17):**

The compounds **35** and **17** have been found to pack in the monoclinic centrosymmetric space group  $P2_1/c$  with  $Z = 4$ . Dimers have been found to form between the two molecules related by center of inversion involving H9 and H1 with F1 in the packing of both **35** and **17** (table 2, figure 2d and 2e). The fluorine atom involved in these dimers have been found to have bifurcated C–H $\cdots$ F hydrogen bonds. These dimers have been found to

propagate along the *c* glide through C–H···X (X = Cl or Br) hydrogen bonds in the compounds **35** and **17** respectively (table 2, figure 2d and 2e).

**Table S2:** Intermolecular C–H··· $\pi$  interactions metrics for compounds **44** and **26**

| Code | C–H··· $\pi$ | C··· $\pi$<br>(Å) | H··· $\pi$<br>(Å) | $\angle$ C–H··· $\pi$<br>(°) | Symmetry<br>Code                  |
|------|--------------|-------------------|-------------------|------------------------------|-----------------------------------|
| 44   | C1–H1···CG1  | 3.50              | 2.84              | 127                          | <sup>-</sup> x,<br>1/2+y,1/2-z    |
|      | C6–H6···CG2  | 3.50              | 2.78              | 133                          | -x,1-y,1-z                        |
| 26   | C1–H1···Cg1  | 3.51              | 2.85              | 128                          | <sup>-</sup><br>x,1/2+y,1/2-<br>z |
|      | C6–H6···Cg2  | 3.53              | 2.81              | 134                          | -x,1-y,1-z                        |

#### Structural comparison of the compounds belonging to class **1c** and **6a**:

**2-chloro-N-(4-fluoro-benzylidene)aniline (45)** and **2-bromo-N-(4-fluorobenzylidene)aniline (27)**:

Among the compounds belonging to the group **1c** (**3**, **27**, **45**), only **3** was solid, while **27** and **45** were found to be liquids at room temperature. The DSC data on **45** and **27** didn't indicate any sharp solidification or melting feature. Several trials of crystal growth using *in situ* crystallization technique were failed to grow single crystals suitable for structural analysis.

**2-fluoro-N-(4-chlorobenzylidene)aniline (36 Form I, 36F1)** and **2-fluoro-N-(4-chlorobenzylidene)aniline (18 Form I, 18F1)**:

Compounds **36F1** and **18F1** were found to crystallize in the orthorhombic non-centrosymmetric  $P2_12_12_1$  space group with  $Z = 4$ . The molecules of 36F1 and 18F1 have been found to form chains through C–H···F hydrogen bonds (involving H1 with F1) along *b*-axis (table 1, figure 3c and 3d) and these chains have been found to be interconnected with each other through C–H··· $\pi$  interactions involving H6 with Cg1 and H9 with Cg2 by the utilization of  $2_1$  screw axis along *b* and *c* directions respectively (ESI, table S3), (figure 3c and 3d).

**2-fluoro-N-(4-chlorobenzylidene)aniline (36 Form II, 36F2)**:

Compound **36F2** was found to crystallize in the orthorhombic non-centrosymmetric  $Pna2_1$  space group with  $Z = 8$  and  $Z' = 2$ . Along the  $b$ -axis, both the molecules of the asymmetric unit have been found to form chains through C–H $\cdots$ F hydrogen bonds (involving H1 with F1 and H14 with F2) (table 3, figure 3e). These chains have been found to be interlinked along the  $c$ -axis through C–H $\cdots\pi$  interactions (H17 and H22 with Cg1, H9 with Cg3 and H12 with Cg4) (ESI, table S3, figure S3a).

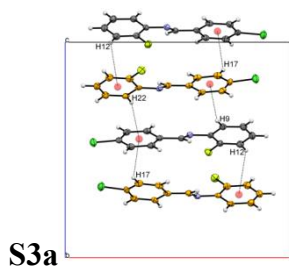

**Figure S3a:** C–H $\cdots\pi$  interactions, connecting the molecules belonging to different chains in **36F2**.

### 2-fluoro-N-(4-bromobenzylidene)aniline (**18 Form II**, **18F2**):

Compound **18F2** has been found to crystallize in the non-centrosymmetric  $P2_1$  space group with  $Z = 4$  and  $Z' = 2$ . The two molecules, designated as A (grey) and B (orange), present in the asymmetric unit were found to form chains of the type  $\cdots A \cdots A \cdots A \cdots$  and  $\cdots B \cdots B \cdots B \cdots$  in the lattice by C–H $\cdots$ F hydrogen bond along  $b$ -axis. But in molecule A of the asymmetric unit, the C–H $\cdots$ F hydrogen bond is bifurcated at the F atom. Due to this bifurcation at F1, these chains (A and B) are further interlinked forming a ladder like structure, which is has been found to extend along the  $b$  axis (table 3, figure 3f). The chains formed by both the molecule of asymmetric unit have been found to interact with other chains by the utilization of C–H $\cdots\pi$  interactions along the  $b$ -axis (ESI, table S3, figure S3b).

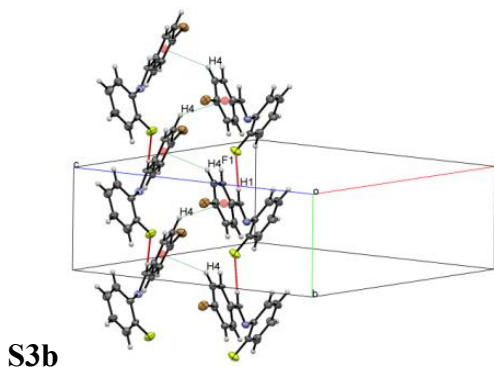

**Figure S3b:** C–H $\cdots\pi$  interactions present between the molecules of the two different chains, which were formed by C–H $\cdots$ F hydrogen bond.

**Table S3:** Intermolecular C–H $\cdots\pi$  interactions metrics for compounds **36F1**, **18F1**, **36F2** and **18F2**

| Code | C–H $\cdots\pi$      | C $\cdots\pi$ (Å) | H $\cdots\pi$ (Å) | $\angle$ C–H $\cdots\pi$ (°) | Symmetry Code    |
|------|----------------------|-------------------|-------------------|------------------------------|------------------|
| 36F1 | C6–H6 $\cdots$ Cg1   | 3.42              | 2.85              | 120                          | -x,-1/2+y,1/2-z  |
|      | C9–H9 $\cdots$ Cg2   | 3.42              | 2.54              | 147                          | -1/2+x,1/2-y,-z  |
| 18F1 | C4–H4 $\cdots$ Cg1   | 3.48              | 2.78              | 132                          | -x,-1/2+y,1-z    |
|      | C13–H13 $\cdots$ Cg2 | 3.64              | 2.85              | 141                          | 1-x,-1/2+y,1-z   |
|      | C17–H17 $\cdots$ Cg3 | 3.53              | 2.84              | 130                          | 2-x,1/2+y,-z     |
|      | C26–H26 $\cdots$ Cg4 | 3.51              | 2.70              | 144                          | 1-x,1/2+y,-z     |
| 36F2 | C6–H6 $\cdots$ Cg4   | 3.58              | 2.94              | 126                          | -x,-y,1/2+z      |
|      | C17–H17 $\cdots$ Cg1 | 3.43              | 2.78              | 127                          | x,y,z            |
|      | C19–H19 $\cdots$ Cg2 | 3.57              | 2.93              | 126                          | -x,-y,-1/2+z     |
|      | C22–H22 $\cdots$ Cg1 | 3.59              | 2.78              | 144                          | -x,1-y,-1/2+z    |
|      | C9–H9 $\cdots$ Cg3   | 3.54              | 2.75              | 141                          | -x,1-y,1/2+z     |
| 18F2 | C6–H6 $\cdots$ Cg1   | 3.45              | 2.87              | 121                          | 1-x,-1/2+y,1/2-z |
|      | C9–H9 $\cdots$ Cg2   | 3.38              | 2.57              | 143                          | -1/2+x,1/2-y,-z  |
|      | C12–H12 $\cdots$ Cg2 | 3.50              | 2.71              | 140                          | x,-1/2-y,1/2+z   |

#### Structural description of the compounds belonging to class 2a and 4b:

**4-chloro-N-(3-fluoro-benzylidene)aniline (46)** and **4-bromo-N-(3-fluorobenzylidene)aniline (28 Form I, 28F1):**

Both the compounds **46** and **28F1** were found to be crystallized in the monoclinic non-centrosymmetric  $P2_1$  space group with  $Z = 2$  with similar unit cell dimensions and packing features in the crystal lattice, which have been described below.

Zigzag chains were found to form by molecules through weak C–H $\cdots$ F hydrogen bond (involving H5 with F1), which are propagating along the  $2_1$  screw axis (table 4, figure 4b and 4c). A chain of hetero dimer has also been observed *via* weak C–H $\cdots$ F hydrogen bond

(involving H9 with F1), and C–H $\cdots\pi$  interactions (involving H7 with Cg1) (ESI, table S4, figure S4a and S4b). Further, these chains have been found to extend along the *a*-axis through C–H $\cdots\pi$  interactions (involving H10 with Cg1 and H12 with Cg2) (ESI, table S4, figure S4a and S4b). But, neither Cl nor Br was found to involve in any kind of interaction in **46** and **28F1** respectively.

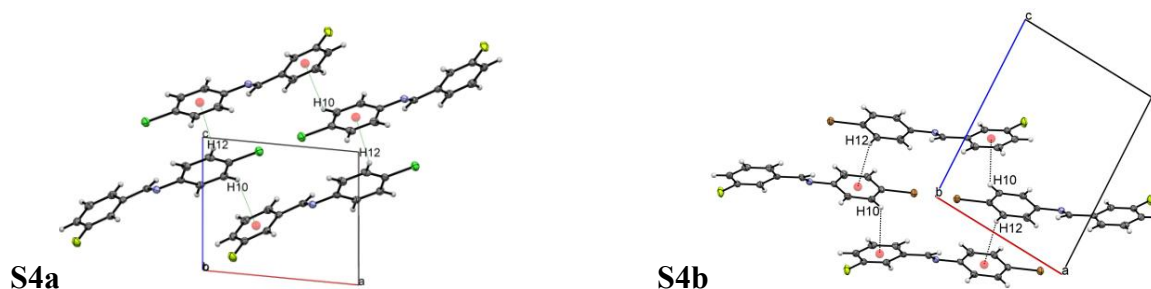

**Figure S4:** (a) Molecules interacting through weak C–H $\cdots\pi$  interactions in the crystal structure of **46**, (b) formation of molecular network *via* weak C–H $\cdots\pi$  interactions in **28F1**.

#### 4-bromo-N-(3-fluorobenzylidene)aniline (28 Form II, 28F2):

The form II of compound **28** (referred to as **28F2**) was found to crystallize in the orthorhombic non-centrosymmetric  $P2_12_12_1$  space group with  $Z = 4$ . The crystal packing of the molecules were found to involve weak C–H $\cdots$ N hydrogen bond (involving H4 with N1 by using  $2_1$  screw along *b*-axis) and type II Br1 $\cdots$ F1 interaction (by using  $2_1$  screw along *c*-axis) to form of a zigzag chain in the *bc* plane (table 4, figure 4f).

#### 4-fluoro-N-(3-chlorobenzylidene)aniline (37) and 4-fluoro-N-(3-bromobenzylidene)aniline (19):

Both the compounds **37** and **19** were found to crystallize in the monoclinic centrosymmetric  $P2_1/c$  space group with  $Z = 4$ . Both the molecules have been found to form ribbons in the *ab* plane by the utilization of  $2_1$  screw axis and involving C–H $\cdots$ F hydrogen bonds (involving H10 with F1) in the similar fashion as was observed in the case of compounds **34** and **16F1**. Then these molecular ribbons were found to be interconnected through type I C–X $\cdots$ X (X = Cl or Br) interactions (table 4, figure 4g and 4h). Very weak C–H $\cdots\pi$  interactions (involving H7 with Cg1, H9 and H12 with Cg2) in the *ac* plane have also been identified in between the sheets formed by C–H $\cdots$ F hydrogen bonds and C–X $\cdots$ X interactions (table S4, figure S4c and S4d)



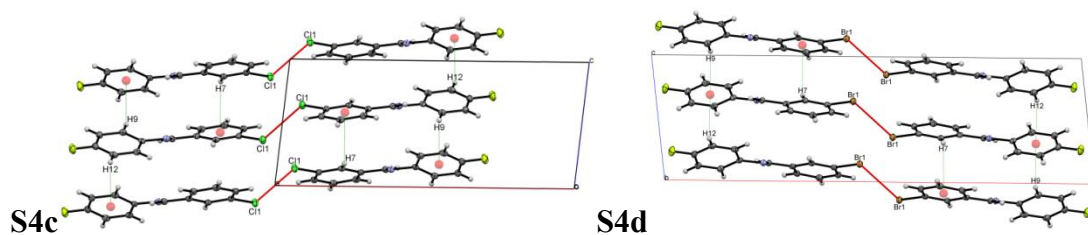

**Figure S4:** (c) Sheets formed interact among each other by C–H... $\pi$  interactions in **37**, (b) interactioning molecular sheets in **19** by C–H... $\pi$  interactions.

**Table S4:** Intermolecular C–H... $\pi$  interactions metrics for compounds **46** and **28F2**

| Code | C–H ... $\pi$ | C... $\pi$<br>(Å) | H ... $\pi$<br>(Å) | $\angle$ C–H<br>... $\pi$ (°) | Symmetry<br>Code |
|------|---------------|-------------------|--------------------|-------------------------------|------------------|
| 46   | C7–H7...Cg1   | 3.52              | 2.83               | 130                           | 1-x,-1/2+y,1-z   |
|      | C10–H10...Cg1 | 3.42              | 2.75               | 127                           | -1+x,y,z         |
|      | C12–H12...Cg1 | 3.46              | 2.72               | 135                           | -x,-1/2+y,-z     |
| 28F2 | C7–H7...Cg1   | 3.54              | 2.86               | 129                           | -x,1/2+y,1-z     |
|      | C10–H10...Cg1 | 3.43              | 2.74               | 130                           | 1+x,y,z          |
|      | C12–H12...Cg2 | 3.52              | 2.75               | 139                           | 1-x,1/2+y,2-z    |

#### Structural comparison of the compounds belonging to class **2b** and **5b**:

All the compounds belonging to the sub-class **2b** (**5**, **47**, **29**) and **5b** (**5**, **38**, **20**) were found to be liquid at 25 °C. Among these, crystal structure of **5** could be determined using *in situ* crystallization technique, while crystals of the others could not be grown in the same way. The DSC data of compounds **20** and **47** have not shown any indication of solidification in the cooling and heating cycles (25 °C to -100 °C and heated back to 25 °C) (ESI, figure S4:5 and 32).

#### Structural comparison of the compounds belonging to class **2c** and **6b**:

**2-chloro-N-(3-fluorobenzylidene)aniline** (**48**) and **2-bromo-N-(3-fluorobenzylidene)aniline** (**30**)

Among the compounds belonging to the sub-class **2c** (**6**, **30**, **48**), **6** was found to be solid at 25 °C and was found to crystallize in the monoclinic  $P2_12_12_1$  space group utilizing C–H...F hydrogen bonds, and C–H... $\pi$  interactions. Crystal structures of **48** and **30** could not be

determined as none of them could be crystallized when cooled from room temperature to -170 °C in a glass capillary on the diffractometer using Oxford cryosystem.

**2-fluoro-N-(3-chlorobenzylidene)aniline (39)** and **2-fluoro-N-(3-bromobenzylidene)aniline (21):**

Compound **39** and **21** were found to crystallize in the orthorhombic non-centrosymmetric  $P2_12_12_1$  space group with  $Z = 4$  with similar packing features. Molecules are found to extend along the  $a$ -axis in the form of chains through bifurcated weak C–H...F hydrogen bonds (involving H1 and H3 with F1). These chains have been found to be interlinked through type I inter-halogen C–F...X ( $X = \text{Cl}$  or  $\text{Br}$ ) interactions along the  $b$ -axis (table 5, figure 5c and 5d). Further, weak C–H... $\pi$  interactions (involving H12 with Cg1) were found to interconnect these chains by the utilization of  $2_1$  screw parallel to the  $c$ -axis (ESI, table S5, figure S5a and S5b).

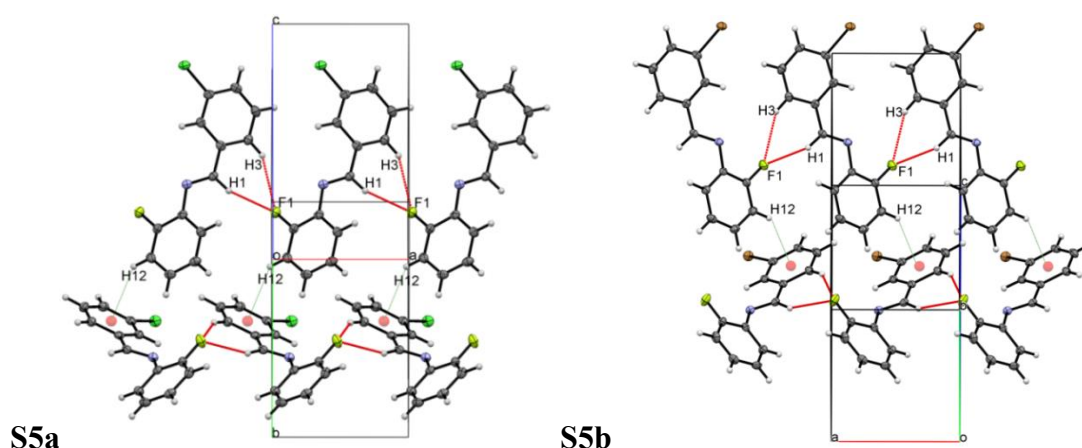

**Figure S5:** (a) Interconnecting molecular layers, which were found to form by weak C–H...F hydrogen bonds, through C–F...X ( $X = \text{Cl}$  or  $\text{Br}$ ) interactions in **39** and **21** respectively (b) C–H... $\pi$  interactions, which were found to interconnect these layers along  $c$ -axis.

**Table S5:** Intermolecular C–H... $\pi$  interactions metrics for compounds **39** and **21**

| Code | C–H ... $\pi$ | C... $\pi$<br>(Å) | H ... $\pi$<br>(Å) | $\angle$ C–H<br>... $\pi$ (°) | Symmetry<br>Code    |
|------|---------------|-------------------|--------------------|-------------------------------|---------------------|
| 39   | C12–H12...Cg1 | 3.73              | 2.93               | 143                           | $3/2-x, -y, 1/2+z$  |
| 21   | C12–H12...Cg1 | 3.75              | 2.94               | 144                           | $1/2-x, 1- , 1/2+z$ |

### Structural comparison of the compounds belonging to class 3a and 4c:

**4-chloro-N-(2-fluorobenzylidene)aniline (49)** and **4-bromo-N-(2-fluorobenzylidene)aniline (31):**

Compounds **49** and **31** were found to be crystallize in the monoclinic centrosymmetric  $P2_1/c$  space group with  $Z = 4$ . Chains have been found to form by the molecules *via* weak C–H $\cdots$ Cl and C–H $\cdots$ Br hydrogen bonds along  $a$ -axis in **49** and **31** respectively (table 6, figure 6b and 6c). Further, weak C–H $\cdots$  $\pi$  interactions (involving H7 with Cg1) were found to hold these chains in both the compounds (ESI, table S6a), (figure 6b and 6c).

**4-fluoro-N-(2-chlorobenzylidene)aniline (40)** and **4-fluoro-N-(2-bromobenzylidene)aniline (22)**

Both the compounds **40** and **22** were found to crystallize in the monoclinic centrosymmetric  $P2_1/c$  space group with  $Z = 4$ . Chains have been found to form along  $c$ -axis through C–H $\cdots$ X ( $X = \text{Cl}$  or  $\text{Br}$ ) hydrogen bond in compound **40** and **22** (table 6, figure 6d and 6e). Very weak  $\pi\cdots\pi$  interactions have been found along the  $b$ -axis between the two molecules of **40** or **22** in their respective crystal structures (ESI, table S6b, figure S6a and S6b).

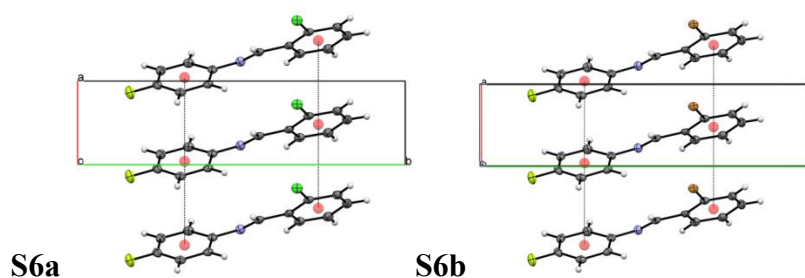

**Figure S6:** (a) weak  $\pi\cdots\pi$  interactions between the molecules of **40** along  $b$ -axis. (b) weak  $\pi\cdots\pi$  interactions between the molecules of **22** along  $b$ -axis.

**Table S6a:** Intermolecular C–H $\cdots$  $\pi$  interactions metrics for compounds **49** and **31**

| Code | C–H $\cdots$ $\pi$ | C $\cdots$ $\pi$ (Å) | H $\cdots$ $\pi$ (Å) | $\angle$ C–H $\cdots$ $\pi$ ( $^\circ$ ) | Symmetry Code |
|------|--------------------|----------------------|----------------------|------------------------------------------|---------------|
| 31   | C7–H7 $\cdots$ Cg1 | 3.76                 | 2.88                 | 154                                      | x,3/2-y,1/2+z |
| 49   | C7–H7 $\cdots$ Cg1 | 3.73                 | 2.85                 | 153                                      | x,1/2-y,1/2+z |

**Table S6b:** Intermolecular  $\pi\cdots\pi$  interactions metrics for compounds **22**

| Code   | $\pi\cdots\pi$   | Cg1 $\cdots$ Cg2<br>(Å) | (Cg1 $\cdots$ Per)*<br>(Å) | (Cg2 $\cdots$ Per)**(Å) | Slippage | Symmetry<br>Code |
|--------|------------------|-------------------------|----------------------------|-------------------------|----------|------------------|
| GK22F1 | Cg1 $\cdots$ Cg1 | 3.96                    | 3.41                       | 3.41                    | 2.01     | x,-1+y,z         |

**Structural comparison of the compounds belonging to class 3b and 5c:****3-chloro-N-(2-fluorobenzylidene)aniline (50) and 3-bromo-N-(2-fluorobenzylidene)aniline (32):**

Compound **50** and **32** were found to be crystallized in the monoclinic centrosymmetric  $P2_1/c$  space group with  $Z = 4$ . These compounds display similar structural features. Both the compounds were found to form hetero-dimers by the use of weak C–H $\cdots$ F hydrogen bonds, involving H9 and H1 with F1 (table 7, figure 7b and 7c) by the utilization  $2_1$  screw along  $b$ -axis. The molecular dimers have been found to be interconnected through C–H $\cdots$ F (again involving H9 and H1 with F1) hydrogen bonds and have been found to propagate along the crystallographic  $b$ -axis, thus generating a chain of hetero-dimers along that axis.

**3-fluoro-N-(2-chlorobenzylidene)aniline (41) and 3-fluoro-N-(2-bromobenzylidene)aniline (23):**

Compounds **41** and **23** were found to crystallize in the orthorhombic non-centrosymmetric  $P2_12_12_1$  space group with  $Z = 4$ . Molecules have been found to be disordered due to rotation of the aryl ring around N–C (Ar) bond. Therefore, fluorine atom is present on both the sides of the *meta* position of the ring (F1A and F1B) with 0.5 occupancy on each position. The disorder modelling has been done by partitioning the ring in two parts with 0.5 occupancies each for both **23** and **41** as described in the section under disorder refinement.

In both the compounds, linear chains have been found to form through C–H $\cdots$ F hydrogen bond (involving H5 with F1A) by the utilization of  $2_1$  screw parallel to the  $c$ -axis (table 7, Figure 7d and 7e). The atom F1B is found to be trifurcated and it forms hydrogen bonds with H1 and H9B, while it is also found to be involved in the type I inter-halogen C–F $\cdots$ X (X = Cl or Br) interactions in **41** and **23** respectively (table 7, Figure 7d and 7e).

## Structural comparison of the compounds belonging to class 3c and 6c:

### 2-chloro-N-(2-fluorobenzylidene)aniline (**51**):

Compound **51** has been found to crystallize in the monoclinic centrosymmetric  $P2_1/c$  space group with  $Z = 4$  ( $Z' = 1$ ). The molecule has been found to have a static disorder in the crystal lattice in which 55% of the molecule crystallizes in one orientation, while the remaining in other, by in plane  $180^\circ$  rotation of the molecule around the C=N bond. Disorder refinement for the molecule has been explained in the disorder refinement section. Molecules have been found to form C–H $\cdots$ Cl hydrogen bonds (involving H6A with Cl1A). These dimers further interconnect with each other through another C–H $\cdots$ Cl hydrogen bond (involving H4A with Cl1A) and thus resulting into a tetrameric unit (table 8, figure 8c).

### 2-bromo-N-(2-fluorobenzylidene)aniline (**33**):

Compound **33** was found to crystallize in the monoclinic centrosymmetric  $Pbcn$  space group with  $Z = 8$ . The molecule is found to be disordered and displays positional disorder around C=N bond with the occupancy ratio 0.9 : 0.1. The disorder was analysed using PART command in SHELXL97 and refined for two independent positions, namely A and B ('A' for higher occupancy), which has been described. The atoms in the major conformer of the molecule are considered for intermolecular interactions analysis.

Molecules related by center of inversion have been found to form dimers through weak C–H $\cdots$ Br hydrogen bond and these dimers were found to propagate in the lattice through C–H $\cdots\pi$  interactions by the utilization of  $c$  glide (table 8, figure 8d).

### 2-fluoro-N-(2-chlorobenzylidene)aniline (**42**):

Compound **42** was found to crystallize in the orthorhombic centrosymmetric  $Pbca$  space group with  $Z = 8$ . The molecules of **42** have been found to interact through the formation of hetero dimers using weak C–H $\cdots$ F and C–H $\cdots$ N hydrogen bonds (involving H11 with F1 and H12 with N1) by the utilization of  $2_1$  screw parallel to the  $b$ -axis in the  $bc$  plane (table 8, figure 8e). Heterodimers involving C–H $\cdots$ F and C–H $\cdots$ Cl hydrogen bonds (involving H5 with F1 and H6 with Cl1) have also been found to form between the molecules related by  $2_1$  screw along  $a$ -axis. Then these dimers have been found to propagate in the  $ac$  plane by another set of C–H $\cdots$ F hydrogen bonds (involving H9 with F1) and a weak C–Cl $\cdots\pi$  interactions (ESI, table S7) involving Cl1 with Cg2 through  $a$  glide perpendicular to  $c$ -axis (Table 8, figure 8f).

**2-fluoro-N-(2-bromobenzylidene)aniline (24):**

Compound **24** was found to crystallize in the monoclinic centrosymmetric  $P2_1/c$  space group with  $Z = 4$ . The molecules related by the center of inversion have been found to form dimers through C–H $\cdots$ F hydrogen bonds involving H12 with F1. These dimers have been found to be interconnected by another group of C–H $\cdots$ F hydrogen bonds involving H6 and H5 with F1 (Table 8, figure 8g). In this case, the F atom has been found to be trifurcated and the Br atom in the A ring has not been found to get involved in any kind of intermolecular interactions.

**Table S7:** Intermolecular C–H $\cdots\pi$  and C–Cl $\cdots\pi$  interactions metrics for compounds **33** and **42** respectively.

| Code | C–X $\cdots\pi$<br>(X = H, Cl) | C $\cdots\pi$ (Å) | X $\cdots\pi$ (Å) | $\angle$ C–X $\cdots\pi$ (°) | Symmetry<br>Code |
|------|--------------------------------|-------------------|-------------------|------------------------------|------------------|
| 33   | C4A–H4A $\cdots$ Cg2           | 3.53              | 2.62              | 160                          | x,-y,-1/2+z      |
| 42   | C3–Cl1 $\cdots$ Cg2            | 5.18              | 3.56              | 154                          | -1/2+x,y,1/2-z   |

**Table S8:** Details of the geometrical parameters for all the C–H...F hydrogen bonds, the values of electron densities and Laplacians at their BCPs and the bond paths ( $R_{ij}$ ) as calculated by AIM2000, which are found in the structures reported herein

| Code | C–H...F         | $d$<br>H...F / Å | $\theta$<br>$\angle$ C–H...F/ $^\circ$ | $\rho$<br>(e Å <sup>-3</sup> ) | $\nabla^2\rho$<br>(e Å <sup>-5</sup> ) | $R_{ij}$ (Å) |
|------|-----------------|------------------|----------------------------------------|--------------------------------|----------------------------------------|--------------|
| 1    | C6–H6...F2      | 2.67             | 131                                    | 0.027                          | 0.555                                  | 2.70         |
|      | C12–H12...F1    | 2.69             | 130                                    | 0.027                          | 0.555                                  | 2.70         |
| 43   | C13–H13...F2    | 2.44             | 150                                    | 0.047                          | 0.893                                  | 2.46         |
|      | C26–H26...F1    | 2.51             | 143                                    | 0.041                          | 0.772                                  | 2.54         |
| 34   | C12–H12...F1    | 2.56             | 153                                    | 0.035                          | 0.694                                  | 2.58         |
| 16F1 | C12–H12...F1    | 2.57             | 153                                    | 0.034                          | 0.676                                  | 2.59         |
| 16F2 | C1–H1...F1      | 2.68             | 153                                    | 0.027                          | 0.531                                  | 2.71         |
|      | C14–H14...F2    | 2.68             | 155                                    | 0.027                          | 0.555                                  | 2.70         |
| 2    | C6–H6...F1      | 2.52             | 128                                    | 0.039                          | 0.758                                  | 2.60         |
|      | C11–H11...F2    | 2.55             | 134                                    | 0.038                          | 0.695                                  | 2.60         |
|      | C13–H13...F2    | 2.55             | 161                                    | 0.036                          | 0.707                                  | 2.59         |
| 44   | C11–H11...F1    | 2.52             | 164                                    | 0.036                          | 0.71                                   | 2.54         |
| 26   | C11–H11...F1    | 2.63             | 166                                    | 0.027                          | 0.548                                  | 2.65         |
| 35   | C1–H1...F1      | 2.56             | 153                                    | 0.036                          | 0.678                                  | 2.59         |
|      | C9–H9...F1      | 2.76             | 156                                    | 0.023                          | 0.471                                  | 2.79         |
| 17   | C1–H1...F1      | 2.58             | 155                                    | 0.034                          | 0.659                                  | 2.60         |
|      | C9–H9...F1      | 2.66             | 162                                    | 0.03                           | 0.589                                  | 2.68         |
| 3    | C1–H1...F2      | 2.32             | 162                                    | 0.068                          | 1.11                                   | 2.35         |
|      | C14–H14...F4    | 2.3              | 161                                    | 0.068                          | 1.135                                  | 2.34         |
|      | C10–H10...F1    | 2.66             | 131                                    | 0.034                          | 0.603                                  | 2.70         |
| 36F1 | C1–H1...F1      | 2.4              | 160                                    | 0.056                          | 0.987                                  | 2.42         |
| 18F1 | C1–H1...F1      | 2.44             | 156                                    | 0.054                          | 0.958                                  | 2.46         |
| 18F2 | C1–H1...F1      | 2.35             | 168                                    | 0.06                           | 1.045                                  | 2.38         |
|      | C14–H14...F2    | 2.41             | 159                                    | 0.054                          | 0.958                                  | 2.43         |
|      | C23–H23...F1    | 2.43             | 142                                    | 0.049                          | 0.927                                  | 2.46         |
| 36F2 | C1–H1...F1      | 2.37             | 173                                    | 0.054                          | 0.99                                   | 2.40         |
|      | C14–H14...F2    | 2.38             | 168                                    | 0.054                          | 0.99                                   | 2.41         |
| 4    | C13A–H13A...F3A | 2.59             | 160                                    | 0.032                          | 0.642                                  | 2.63         |
|      | C16A–H16A...F1A | 2.62             | 157                                    | 0.031                          | 0.606                                  | 2.67         |
|      | C18A–H18A...F3A | 2.53             | 135                                    | 0.04                           | 0.77                                   | 2.58         |
|      | C23A–H23A...F4A | 2.56             | 140                                    | 0.035                          | 0.69                                   | 2.61         |
|      | C5A–H5A...F1A   | 2.56             | 136                                    | 0.037                          | 0.715                                  | 2.61         |
|      | C5A–H5A...F2A   | 2.7              | 128                                    | 0.026                          | 0.543                                  | 2.74         |
| 46   | C5–H5...F1      | 2.62             | 136                                    | 0.034                          | 0.659                                  | 2.65         |
|      | C9–H9...F1      | 2.7              | 156                                    | 0.023                          | 0.48                                   | 2.72         |
| 28F1 | C5–H5...F1      | 2.65             | 138                                    | 0.031                          | 0.616                                  | 2.68         |

|     |               |      |     |       |       |      |
|-----|---------------|------|-----|-------|-------|------|
|     | C9-H9...F1    | 2.65 | 156 | 0.026 | 0.536 | 2.68 |
| 37  | C10-H10...F1  | 2.62 | 126 | 0.031 | 0.623 | 2.67 |
| 19  | C10-H10...F1  | 2.63 | 126 | 0.031 | 0.618 | 2.68 |
| 6   | C1-H1...F1    | 2.47 | 163 | 0.041 | 0.768 | 2.51 |
| 39  | C1-H1...F1    | 2.46 | 153 | 0.048 | 0.864 | 2.49 |
|     | C3-H3...F1    | 2.66 | 149 | 0.027 | 0.558 | 2.69 |
| 21  | C1-H1...F1    | 2.49 | 152 | 0.045 | 0.823 | 2.52 |
|     | C3-H3...F1    | 2.64 | 150 | 0.029 | 0.594 | 2.66 |
| 7   | C6A-H6A...F1  | 2.61 | 127 | 0.035 | 0.596 | 2.66 |
|     | C6A-H6A...F2  | 2.54 | 136 | 0.041 | 0.775 | 2.57 |
|     | C1-H1...F1    | 2.32 | 146 | 0.067 | 1.154 | 2.35 |
| 8   | C9-H9...F1    | 2.55 | 169 | 0.038 | 0.734 | 2.56 |
|     | C1-H1...F1    | 2.67 | 157 | 0.03  | 0.584 | 2.68 |
| 50  | C9-H9...F1    | 2.61 | 164 | 0.032 | 0.628 | 2.64 |
|     | C1-H1...F1    | 2.69 | 155 | 0.027 | 0.546 | 2.71 |
| 32  | C9-H9...F1    | 2.66 | 163 | 0.029 | 0.57  | 2.68 |
|     | C1-H1...F1    | 2.7  | 154 | 0.026 | 0.531 | 2.72 |
| 41  | C1-H1...F1B   | 2.61 | 167 | 0.028 | 0.575 | 2.61 |
|     | C9B-H9B...F1B | 2.56 | 125 | 0.043 | 0.797 | 2.60 |
|     | C5-H5...F1A   | 2.57 | 124 | 0.043 | 0.797 | 2.64 |
| 23  | C1-H1...F1B   | 2.66 | 163 | 0.025 | 0.521 | 2.68 |
|     | C9B-H9B...F1B | 2.55 | 126 | 0.043 | 0.801 | 2.60 |
|     | C5-H5...F1A   | 2.62 | 124 | 0.029 | 0.716 | 2.67 |
| 9F1 | C6-H6...F2    | 2.68 | 131 | 0.026 | 0.56  | 2.70 |
| 9F2 | C5-H5...F2    | 2.62 | 132 | 0.028 | 0.558 | 2.65 |
|     | C12-H12...F2  | 2.64 | 176 | 0.027 | 0.555 | 2.67 |
| 42  | C11-H11...F1  | 2.6  | 131 | 0.037 | 0.715 | 2.64 |
|     | C9-H9...F1    | 2.6  | 142 | 0.035 | 0.676 | 2.63 |
|     | C5-H5...F1    | 2.53 | 139 | 0.036 | 0.719 | 2.55 |
| 24  | C5-H5...F1    | 2.65 | 124 | 0.029 | 0.608 | 2.70 |
|     | C6-H6...F1    | 2.69 | 122 | 0.029 | 0.601 | 2.74 |



**Figure S1:  $^1\text{H}$  NMR of all compounds:** All NMR experiments were recorded on 400 MHz spectrometer (from Bruker) in  $\text{CDCl}_3$  as solvent.

**FigureS1:1 Compound 16:** White solid.  $^1\text{H}$  NMR ( $\text{CDCl}_3$ )  $\delta$  8.39 (s, 1H), 7.75-7.77 (d, 2H), 7.60-7.62 (d, 2H), 7.18-7.22 (m, 2H), 7.06-7.10 (t, 2H)

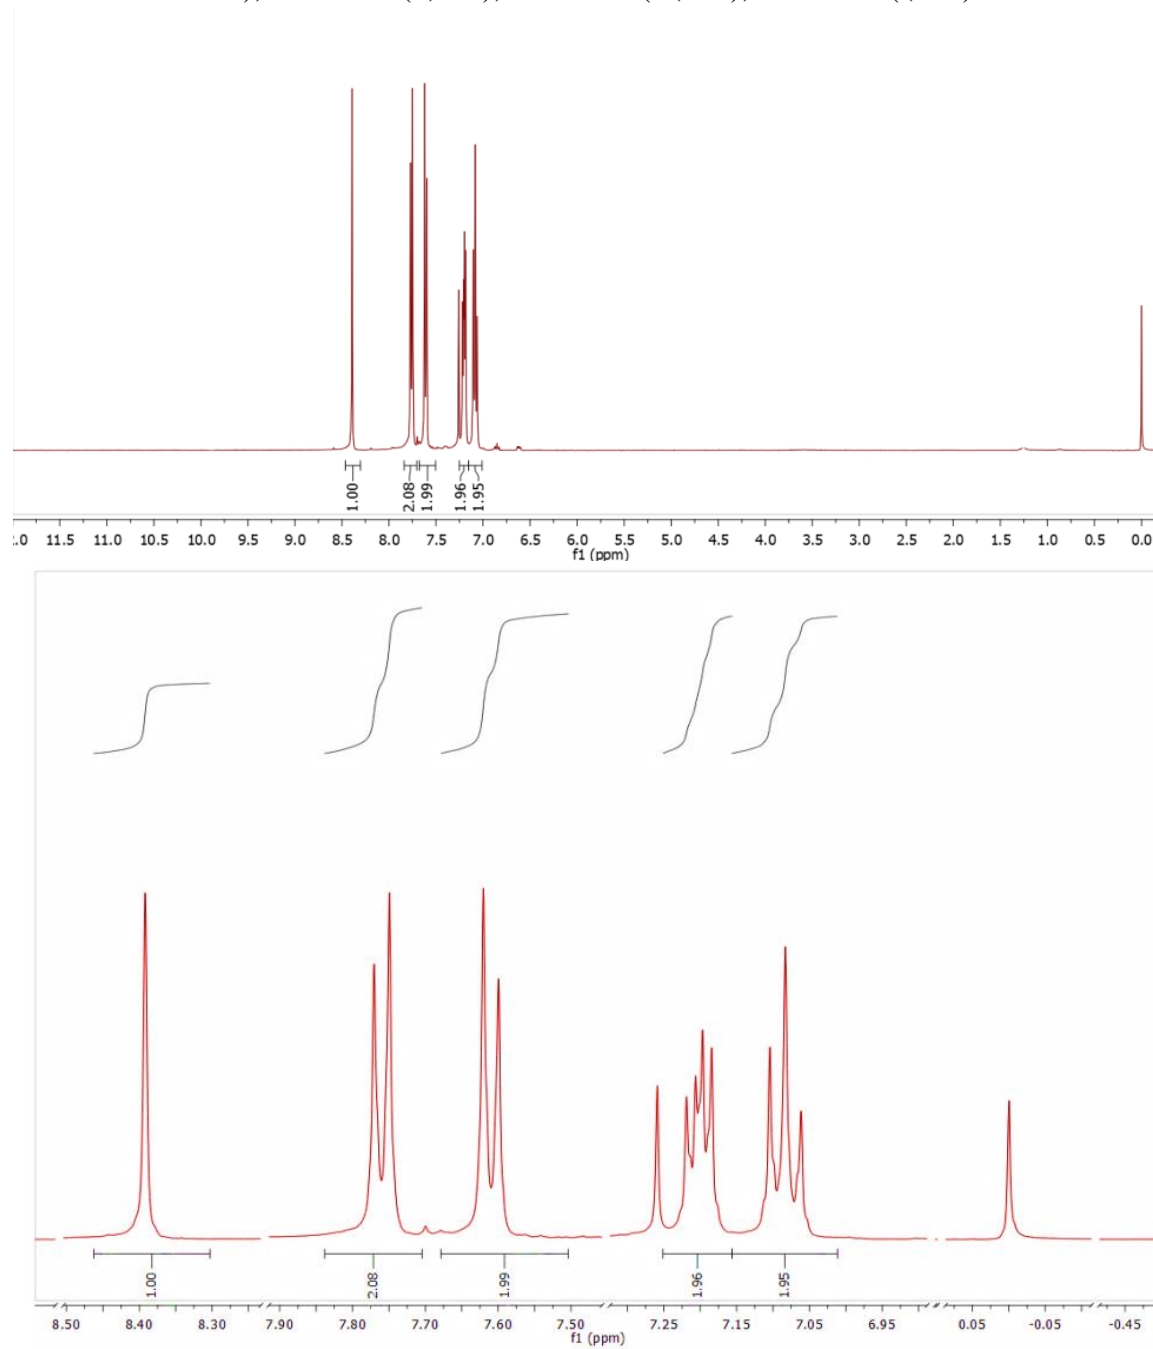

**FigureS1:2**      **Compound 17:** White solid.  $^1\text{H}$  NMR ( $\text{CDCl}_3$ )  $\delta$  8.41 (s, 1H), 7.78-7.80 (d, 2H), 7.63-7.65 (d, 2H), 7.34-7.40 (q, 1H), 6.93-7.02 (m, 3H).

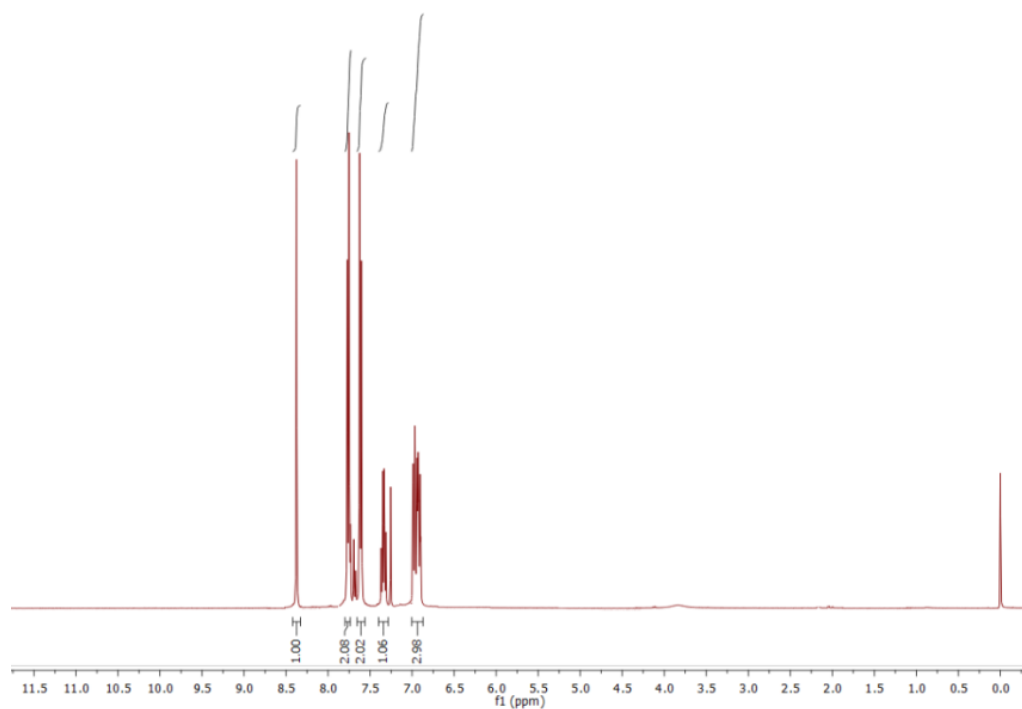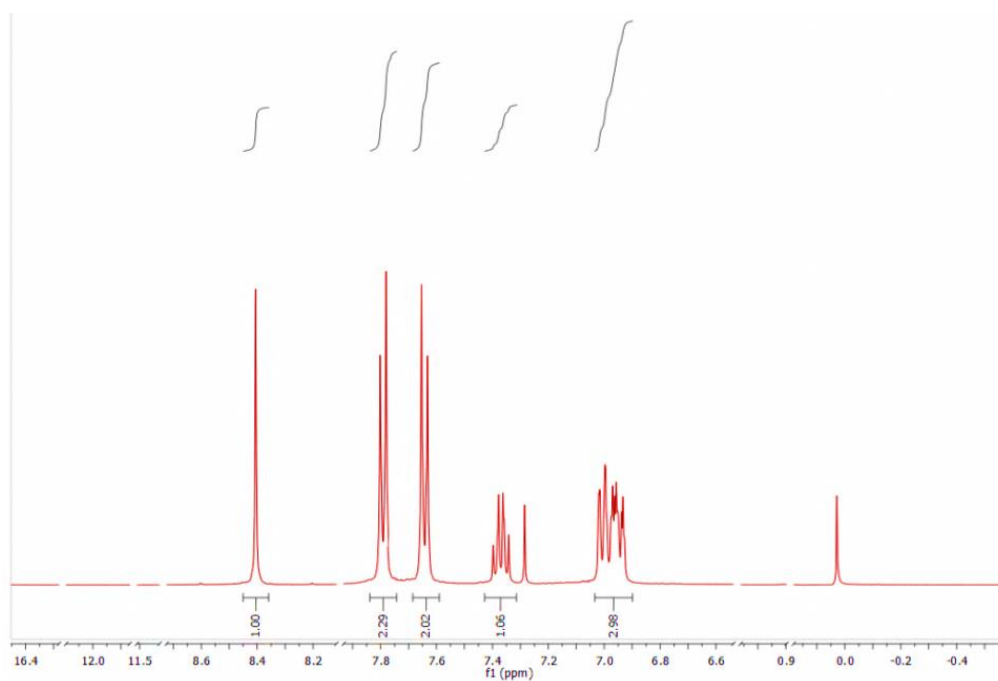

**FigureS1:3**

**Compound 18:** White solid.  $^1\text{H}$  NMR ( $\text{CDCl}_3$ )  $\delta$  8.47 (s, 1H), 7.78-7.80 (d, 2H), 7.60-7.62 (d, 2H), 7.11-7.20 (m, 4H),

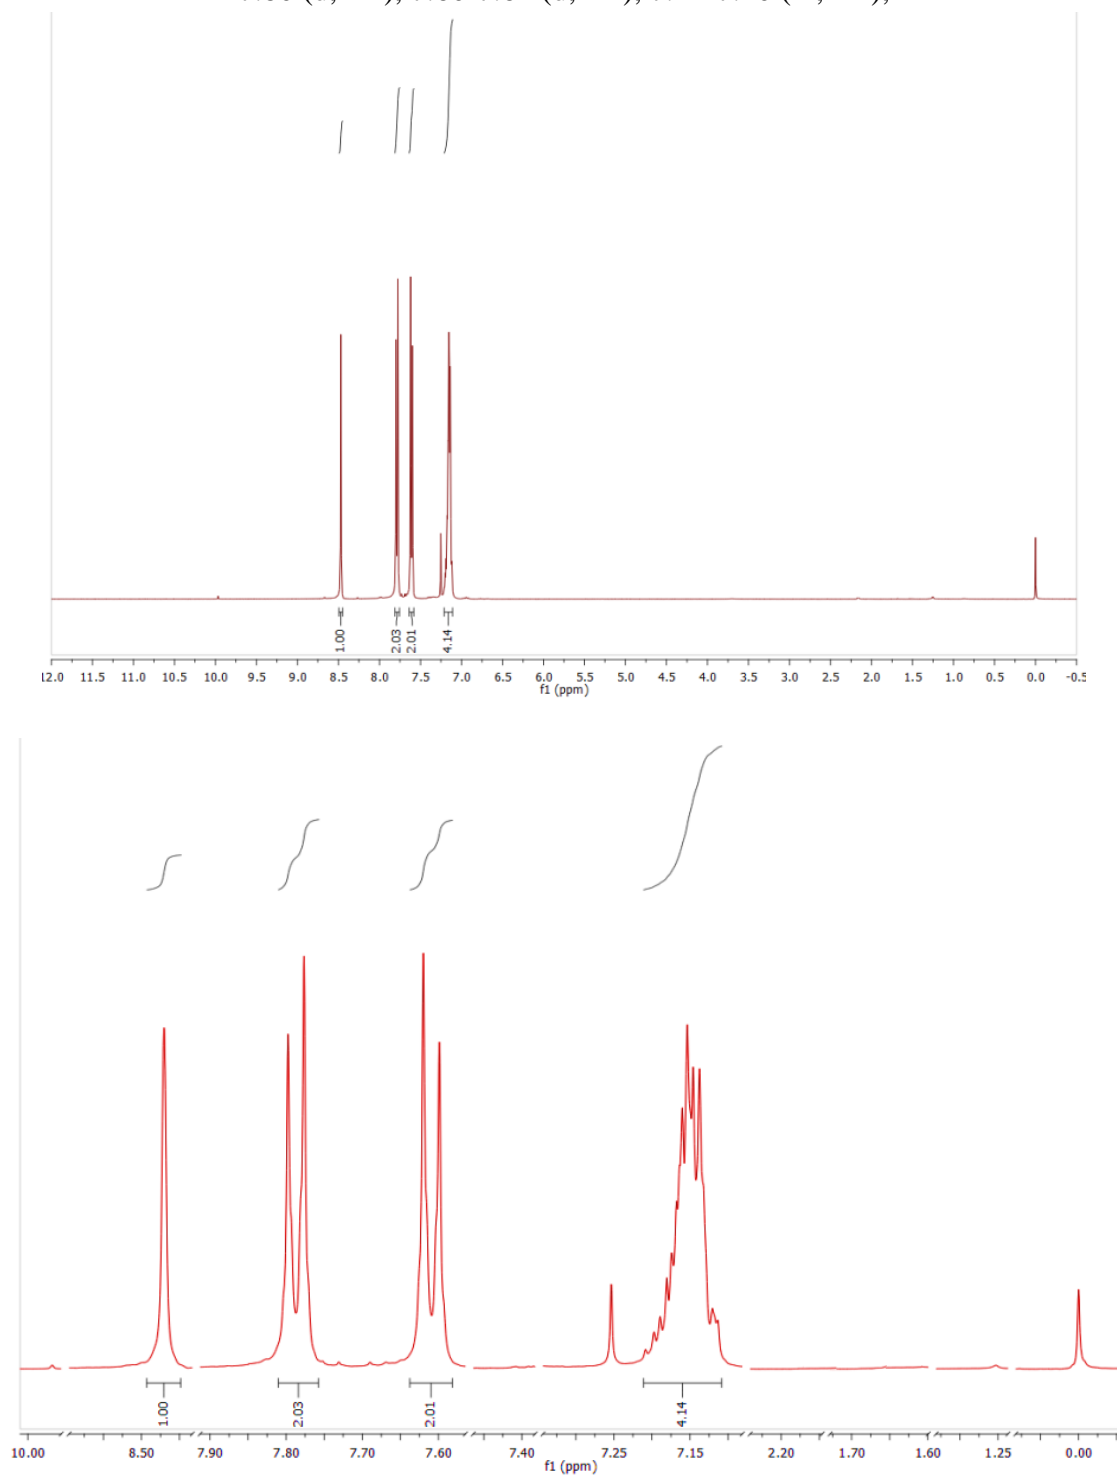

**FigureS1:4**      **Compound 19:** White solid.  $^1\text{H}$  NMR ( $\text{CDCl}_3$ )  $\delta$  8.38 (s, 1H), 8.09 (s, 1H), 7.77-7.79 (d, 1H), 7.59-7.61 (d, 1H), 7.33-7.36 (t, 1H), 7.19-7.22 (m, 2H), 7.07-7.11 (m, 2H),

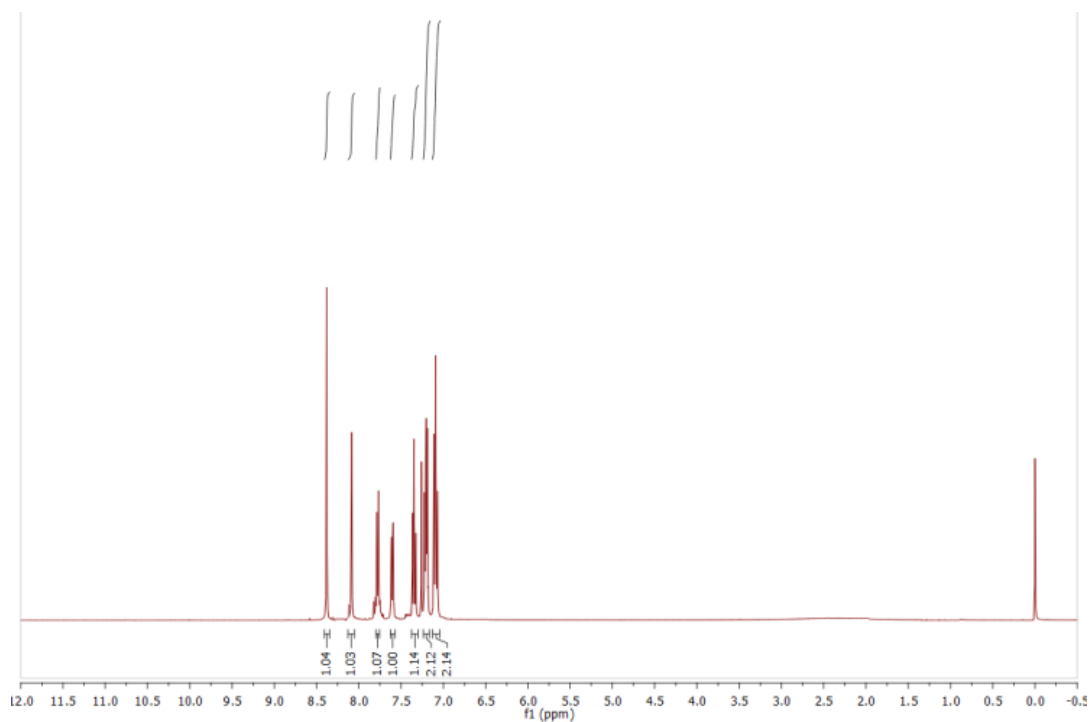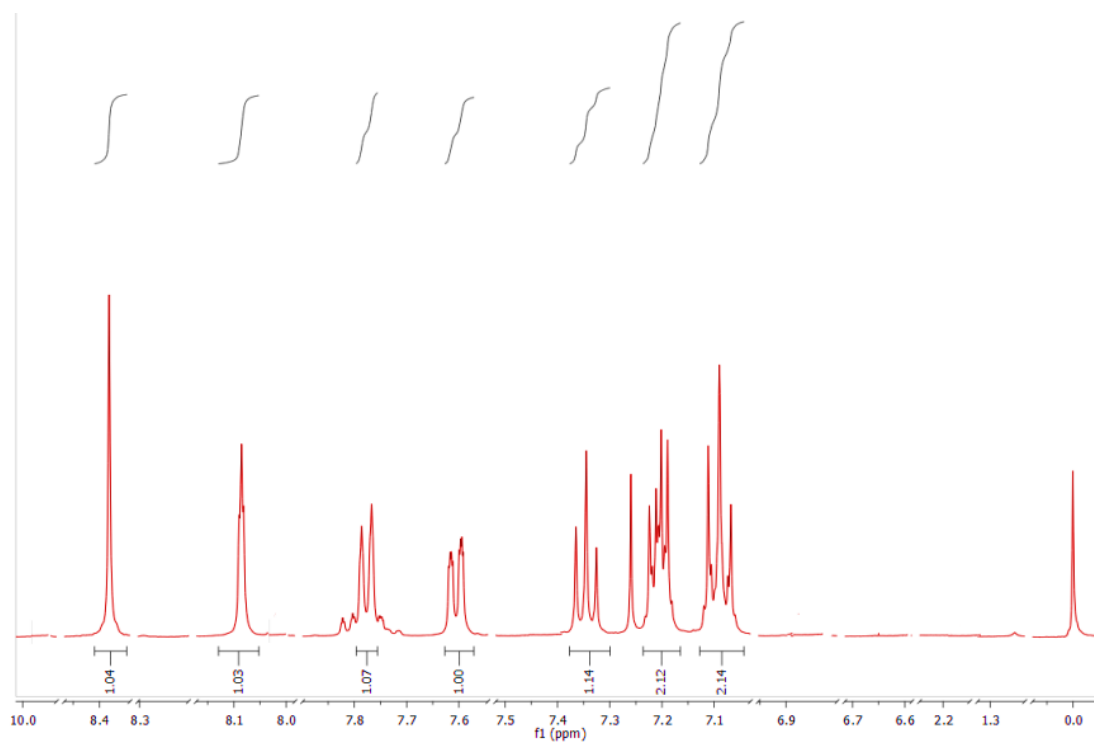

**FigureS1:5**      **Compound 20:** White solid.  $^1\text{H}$  NMR ( $\text{CDCl}_3$ )  $\delta$  8.36 (s, 1H), 8.08-8.09 (t, 1H), 7.77-7.79 (dt, 1H), 7.61-7.63 (m, 1H), 7.33-7.37 (m, 2H), 6.90-6.99 (m, 3H),

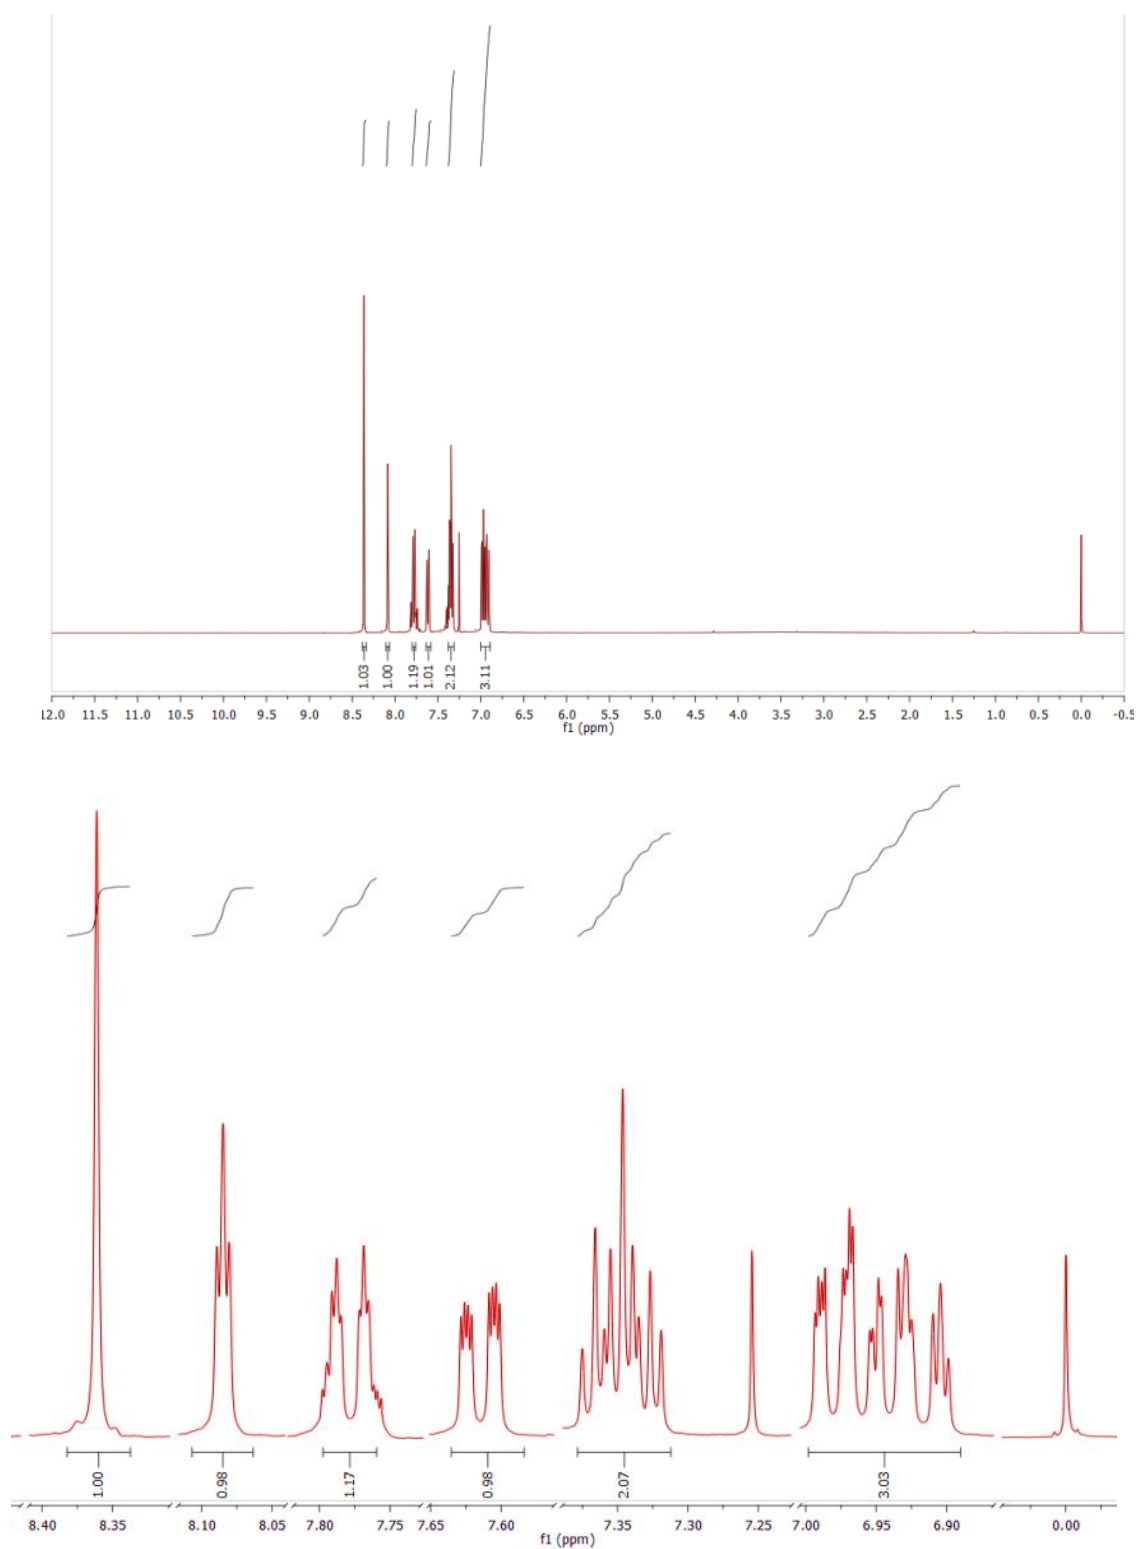

**FigureS1:6**      **Compound 21:** White solid.  $^1\text{H}$  NMR ( $\text{CDCl}_3$ )  $\delta$  8.49 (s, 1H), 8.14-8.15 (t, 1H), 7.83-7.85 (d, 1H), 7.63-7.66 (m, 1H), 7.36-7.40 (t, 1H), 7.15-7.24 (m, 4H)

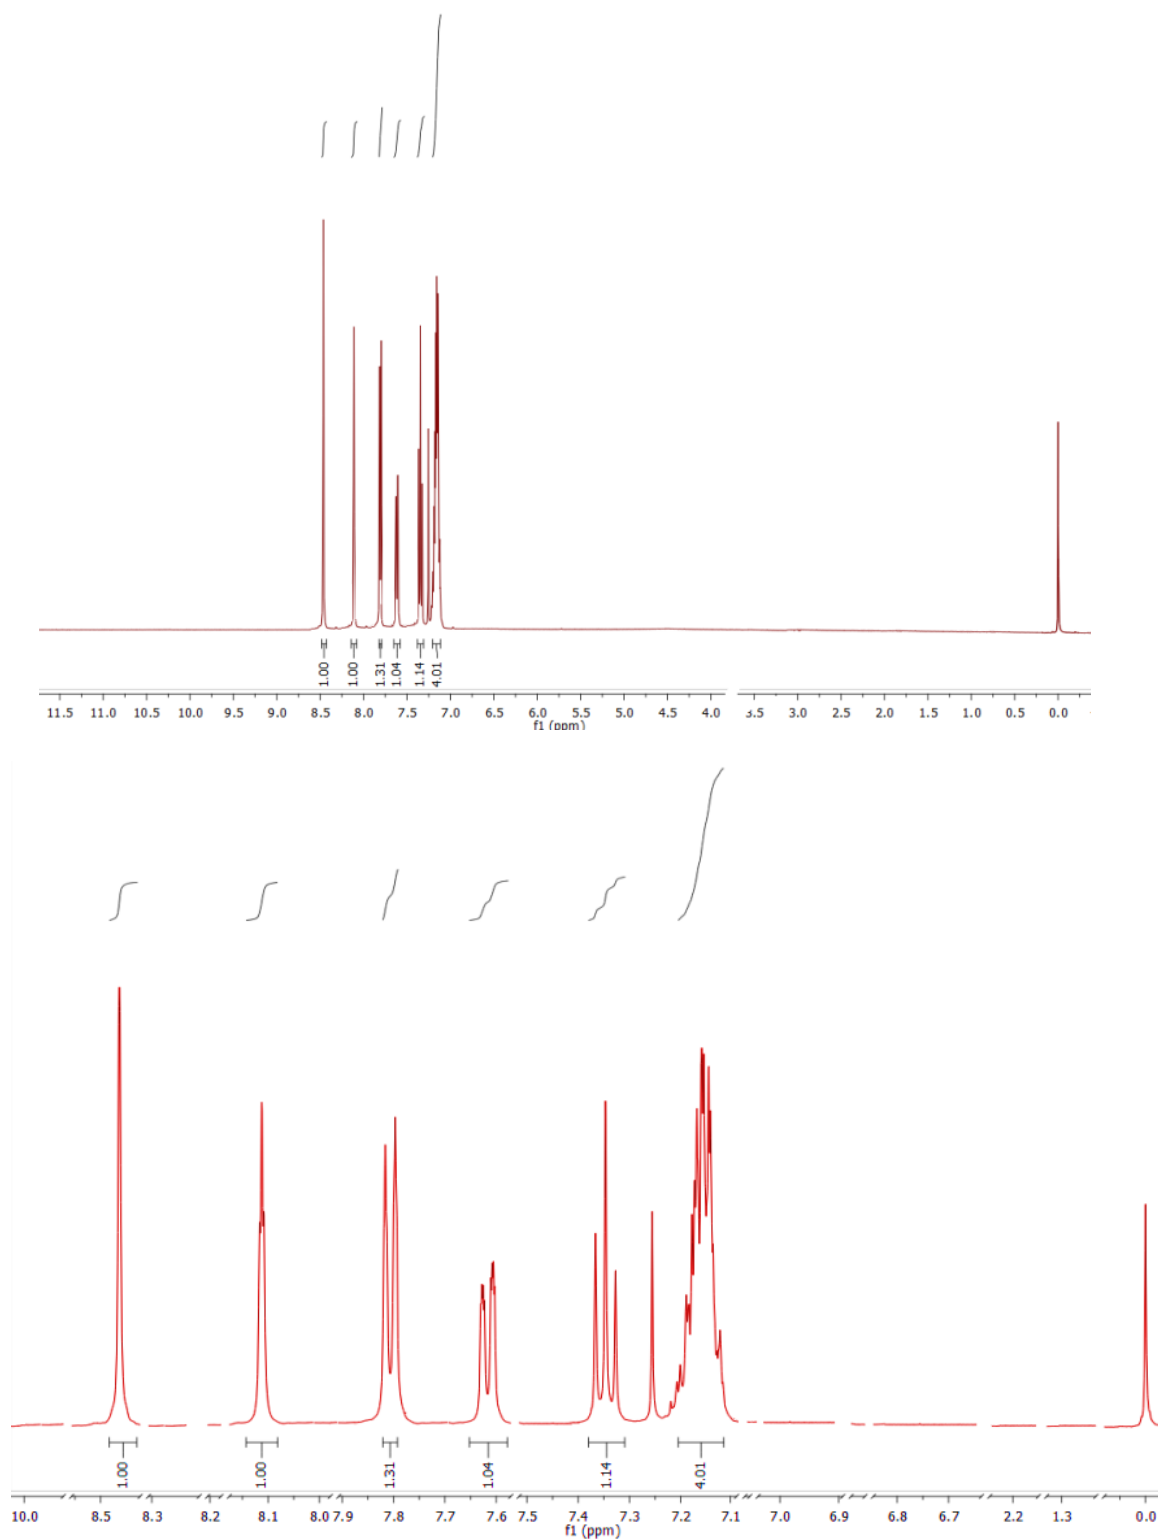

**FigureS1:7**      **Compound 22:** White solid.  $^1\text{H}$  NMR ( $\text{CDCl}_3$ )  $\delta$  8.83 (s, 1H), 8.19-8.22 (dd, 1H), 7.61-7.63 (dd, 1H), 7.38-7.42 (t, 1H), 7.30-7.34 (td, 1H), 7.22-7.25 (m, 2H), 7.07-7.13 (m, 2H)

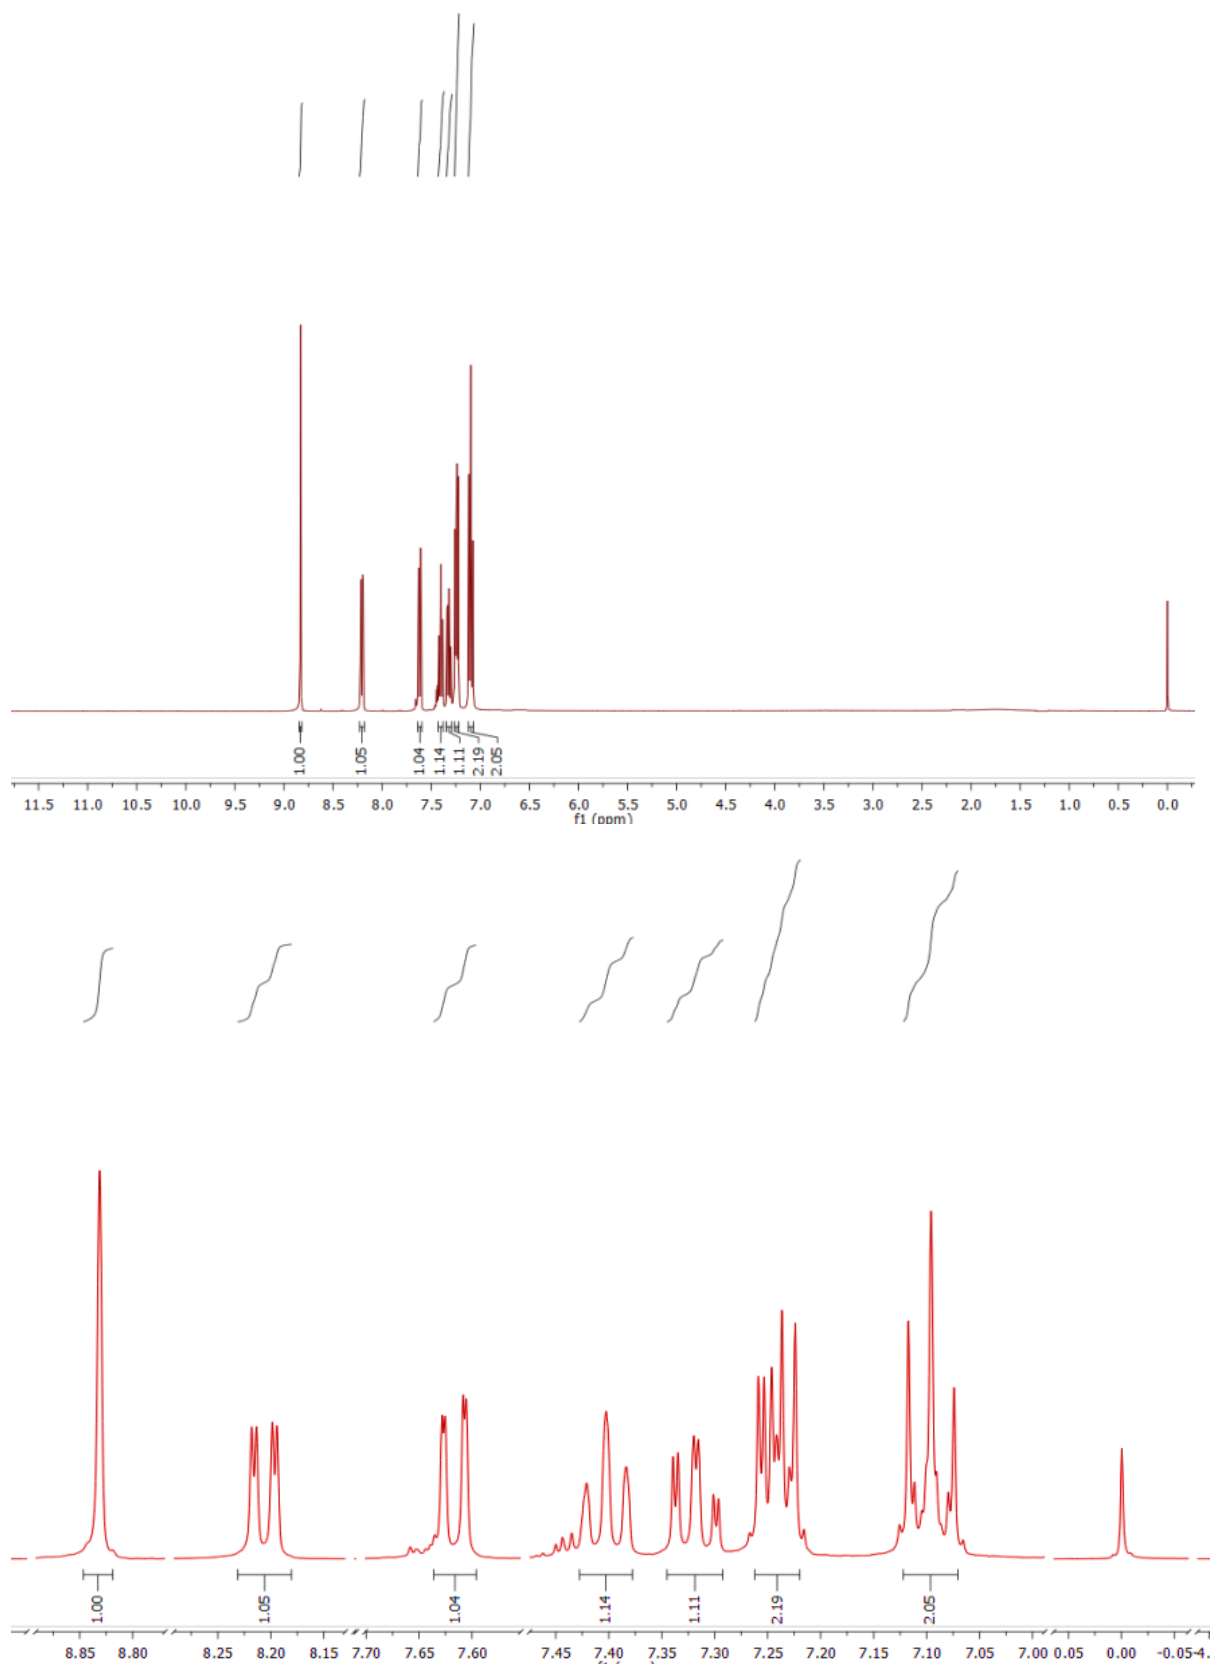

**FigureS1:8**      **Compound 23:** White solid.  $^1\text{H}$  NMR ( $\text{CDCl}_3$ )  $\delta$  8.84 (s, 1H), 8.21-8.23 (dd, 1H), 7.63-7.65 (q, 1H), 7.32-7.48 (m, 4H), 6.97-7.00 (m, 2H)

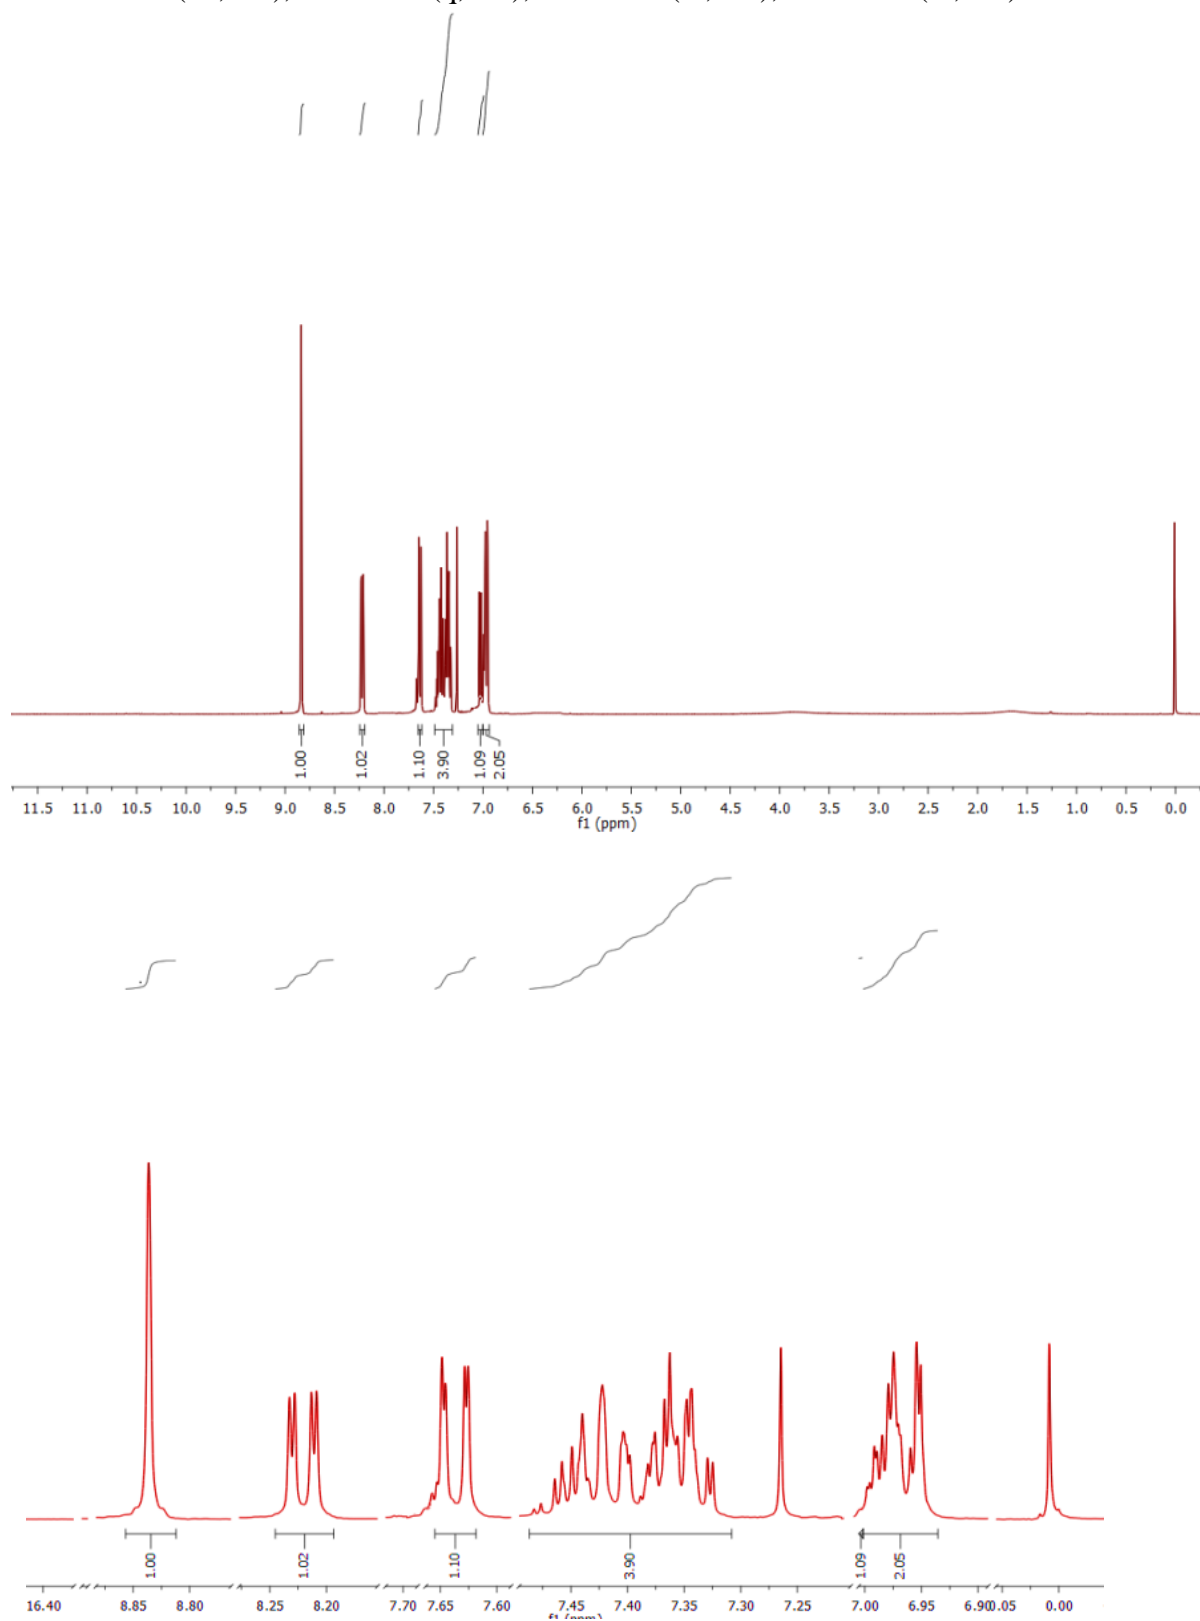



**FigureS1:9**      **Compound 24:** White solid.  $^1\text{H}$  NMR ( $\text{CDCl}_3$ )  $\delta$  8.91 (s, 1H), 8.26-8.28 (d, 1H), 7.61-7.63 (d, 1H), 7.32-7.43 (dt, 2H), 7.13-7.25 (m, 4H)

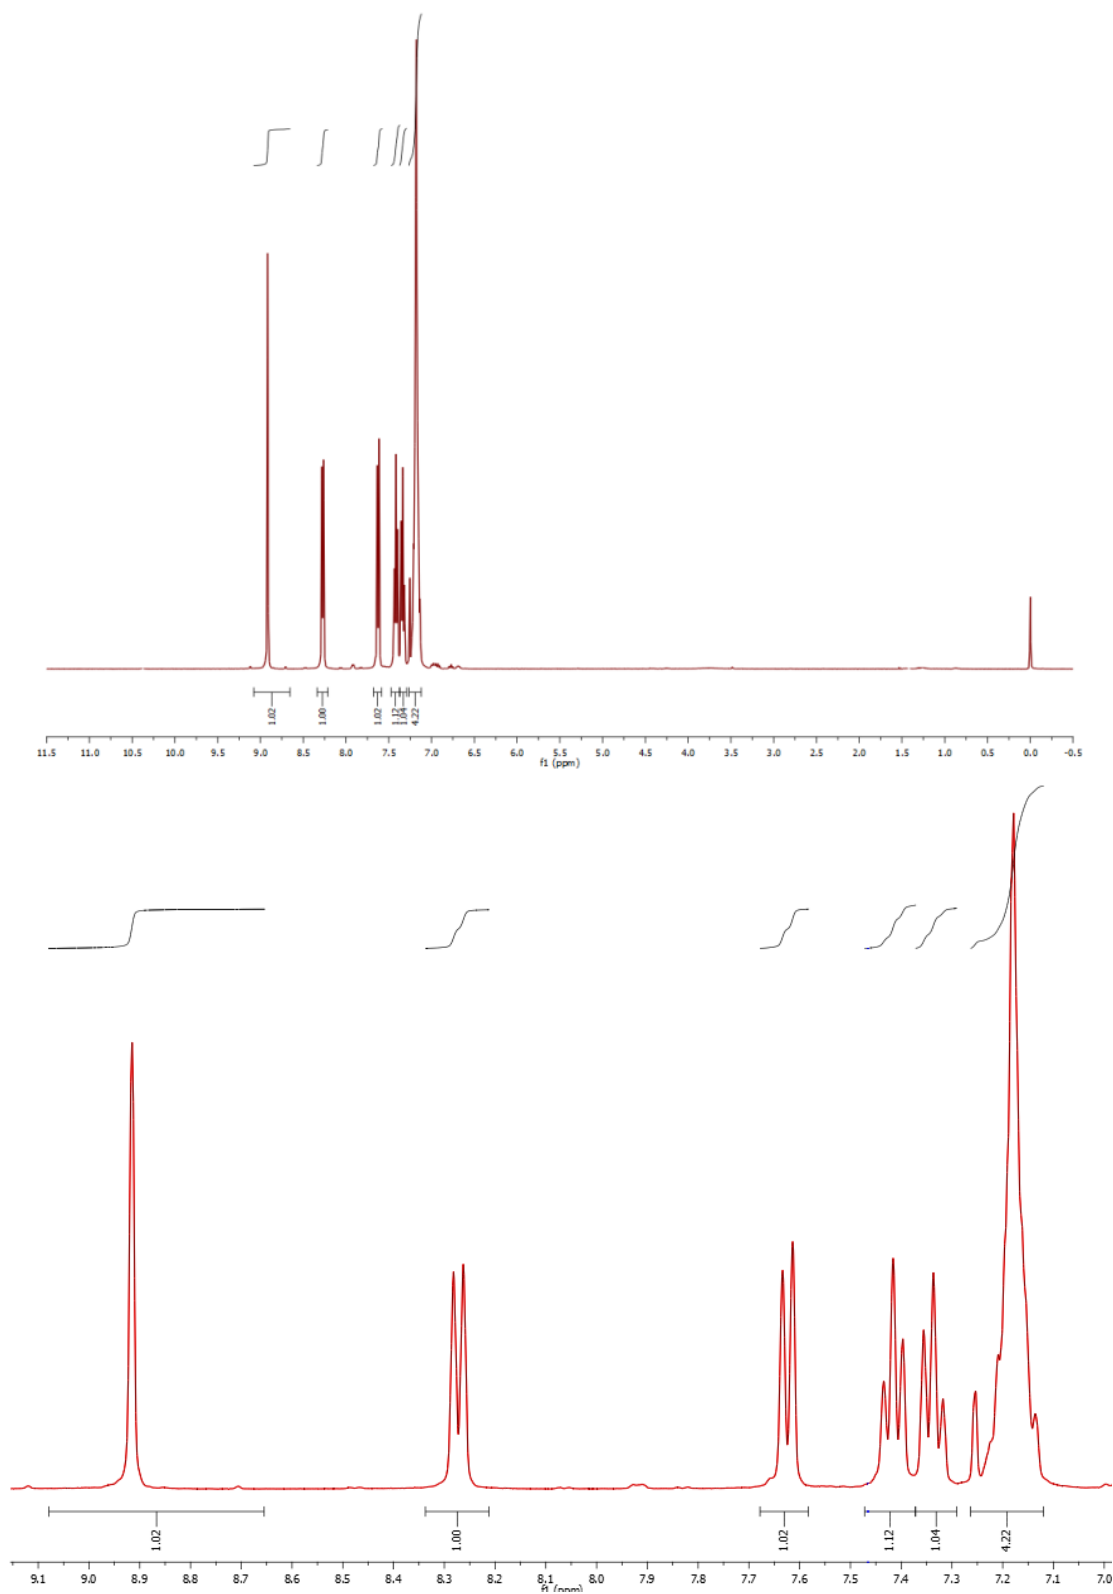

**FigureS1:10**      **Compound 25:** White solid.  $^1\text{H}$  NMR ( $\text{CDCl}_3$ )  $\delta$  8.41 (s, 1H), 8.26-8.28 (q, 2H), 7.51-7.54 (d, 2H), 7.16-7.21 (t, 2H), 7.09-7.11 (d, 2H)

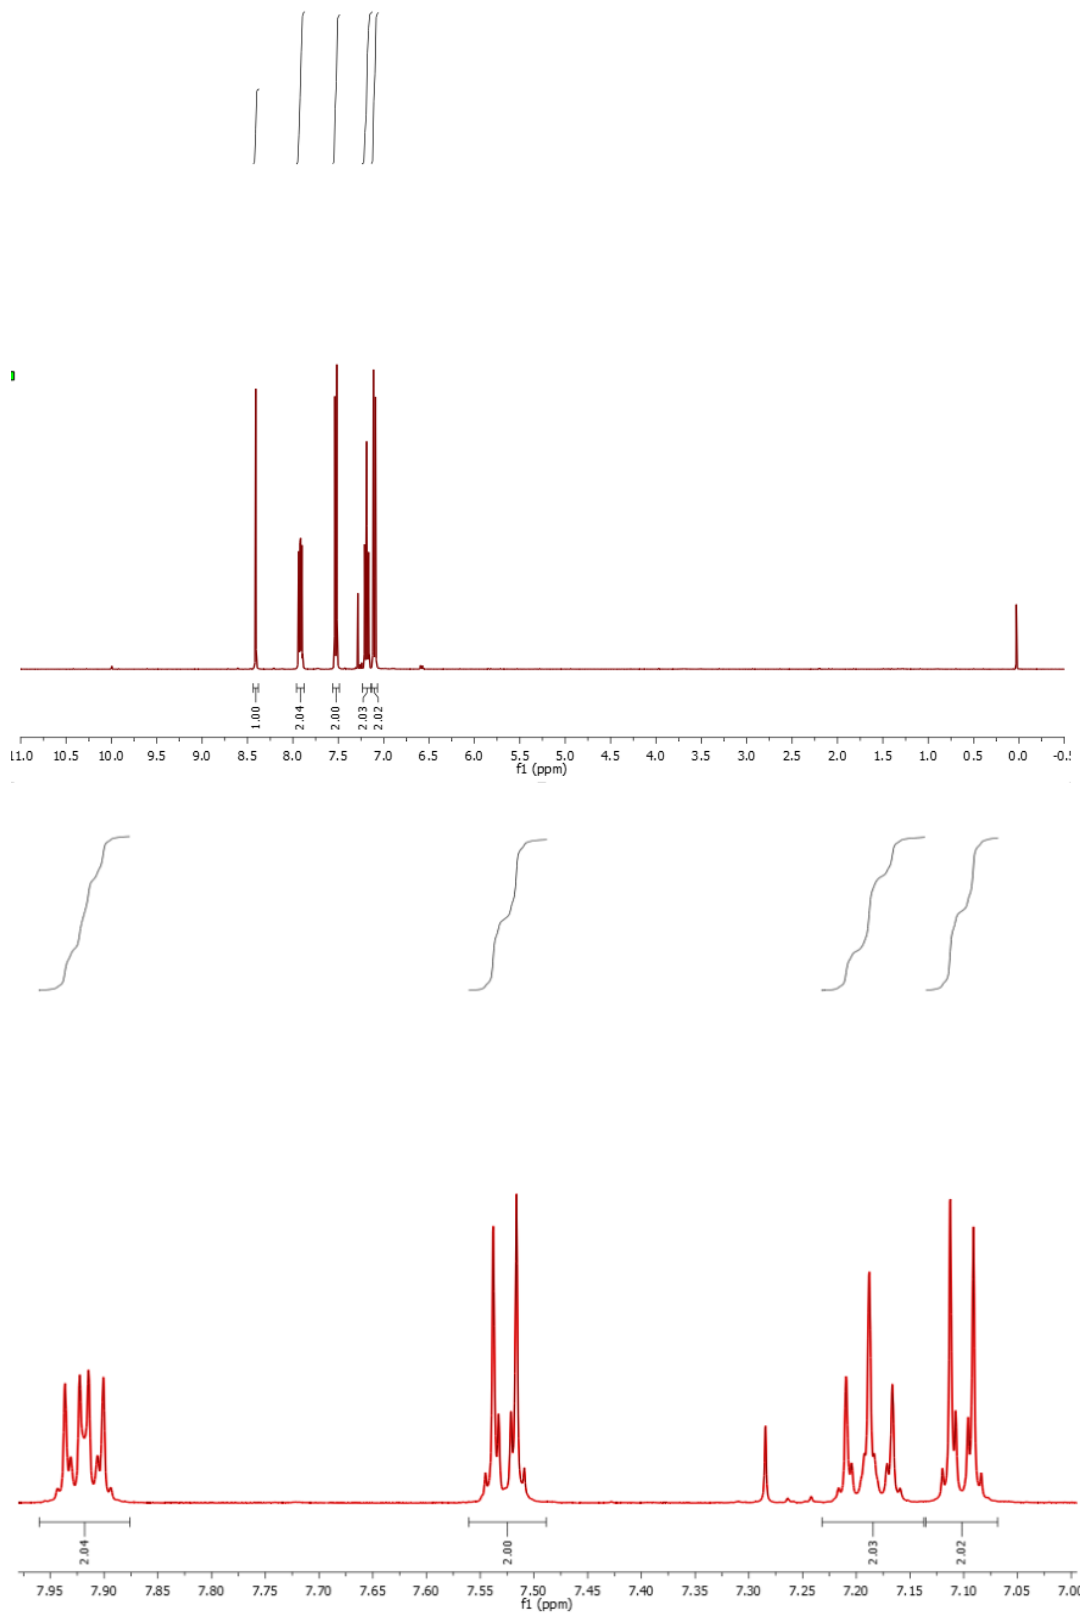

**FigureS1:11**      **Compound 26:** White solid.  $^1\text{H}$  NMR ( $\text{CDCl}_3$ )  $\delta$  8.40 (s, 1H), 7.90-7.93 (q, 2H), 7.36-7.40 (d, 2H), 7.26-7.30 (t, 1H), 7.14-7.21 (m, 3H)

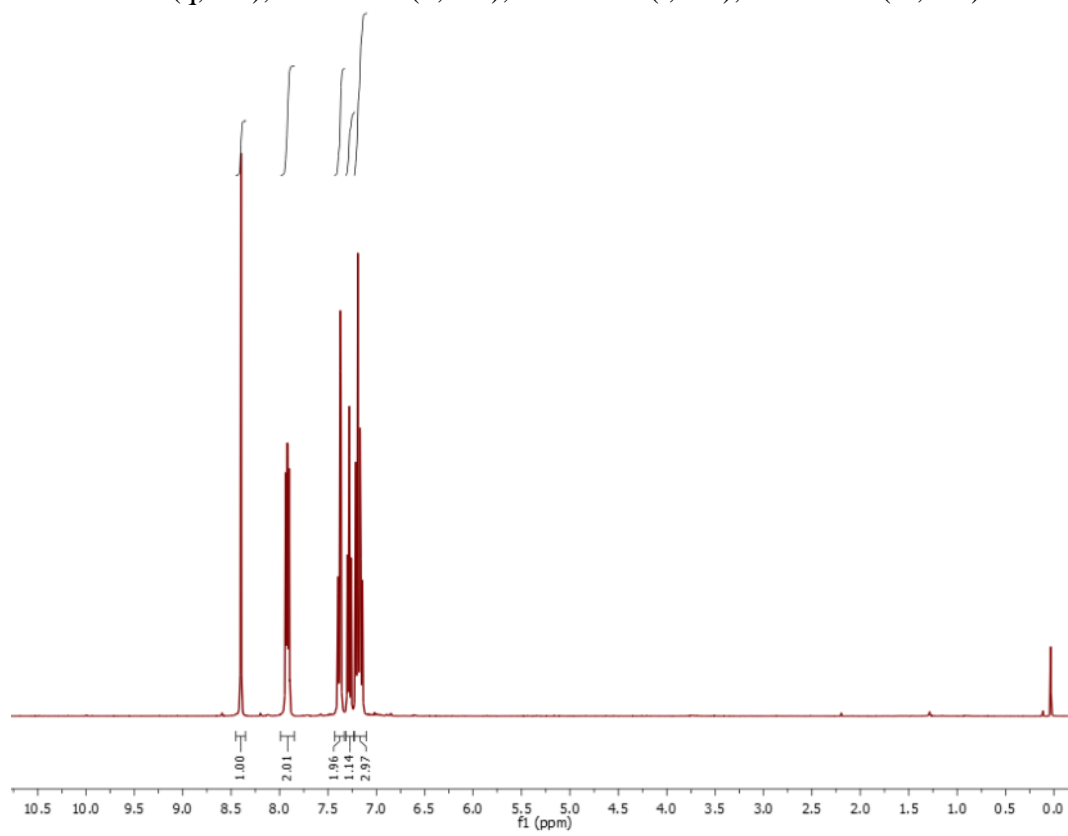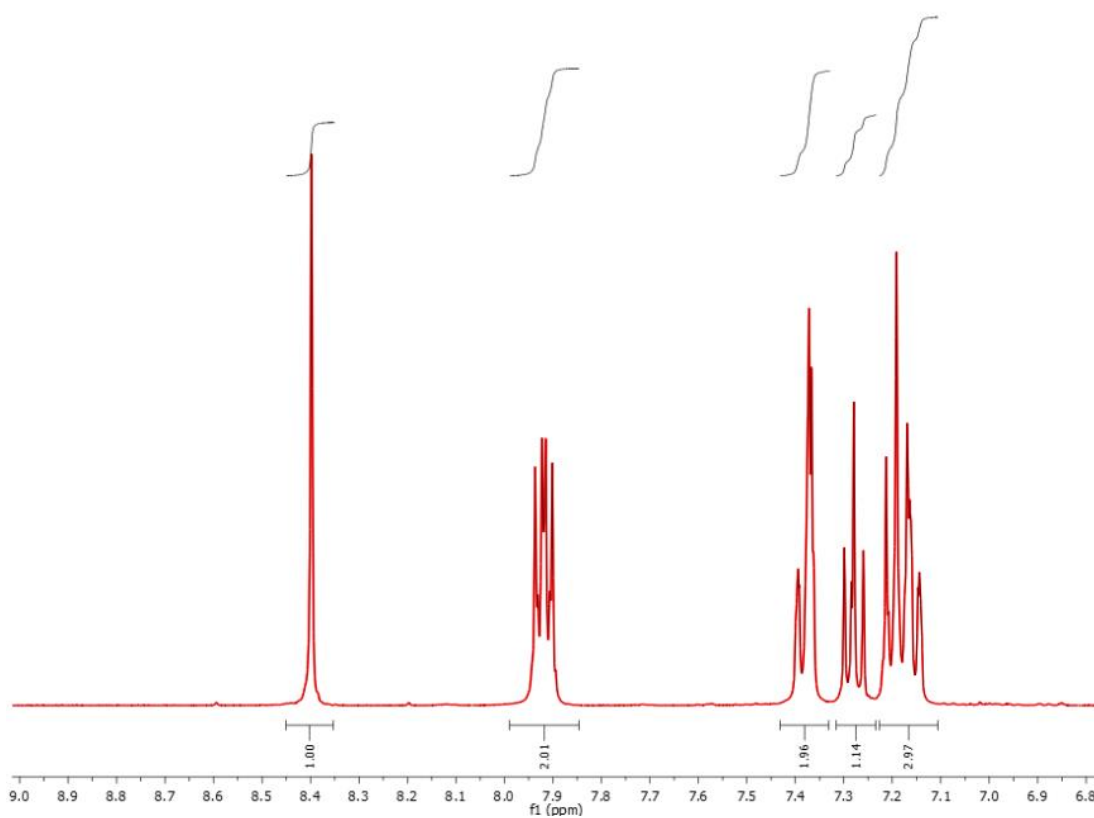

**FigureS1:12**      **Compound 27:** White solid.  $^1\text{H}$  NMR ( $\text{CDCl}_3$ )  $\delta$  8.33 (s, 1H), 7.97-8.00 (q, 2H), 7.65-7.68 (d, 1H), 7.33-7.37 (t, 1H), 7.08-7.26 (m, 4H)

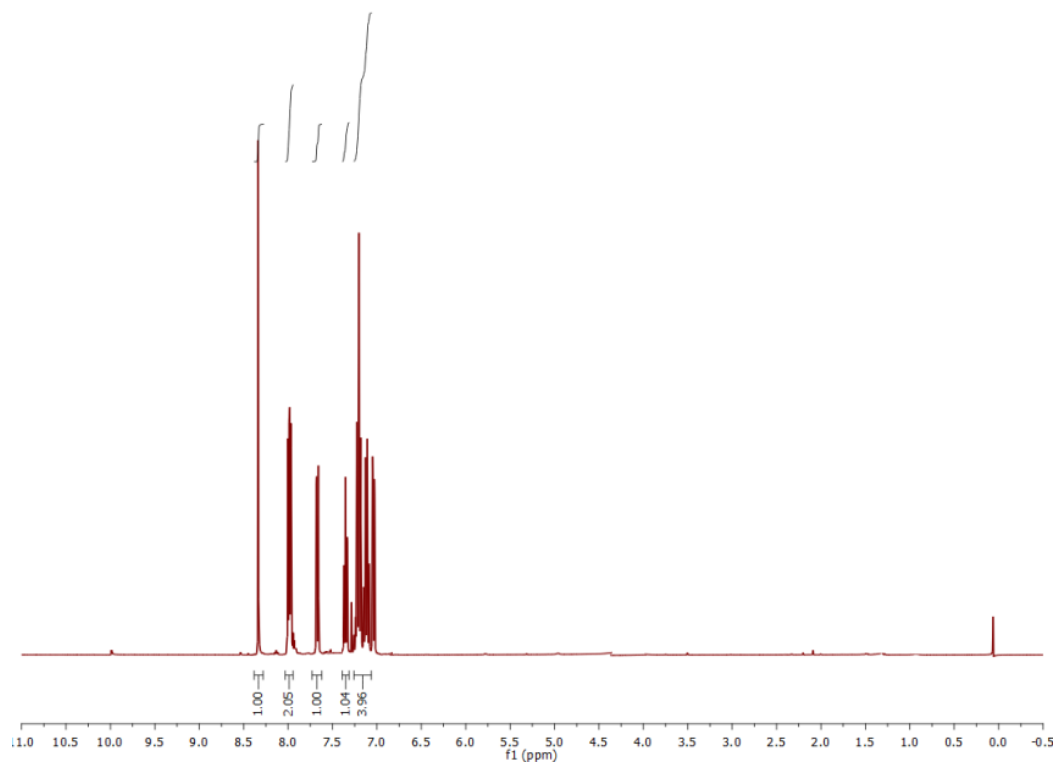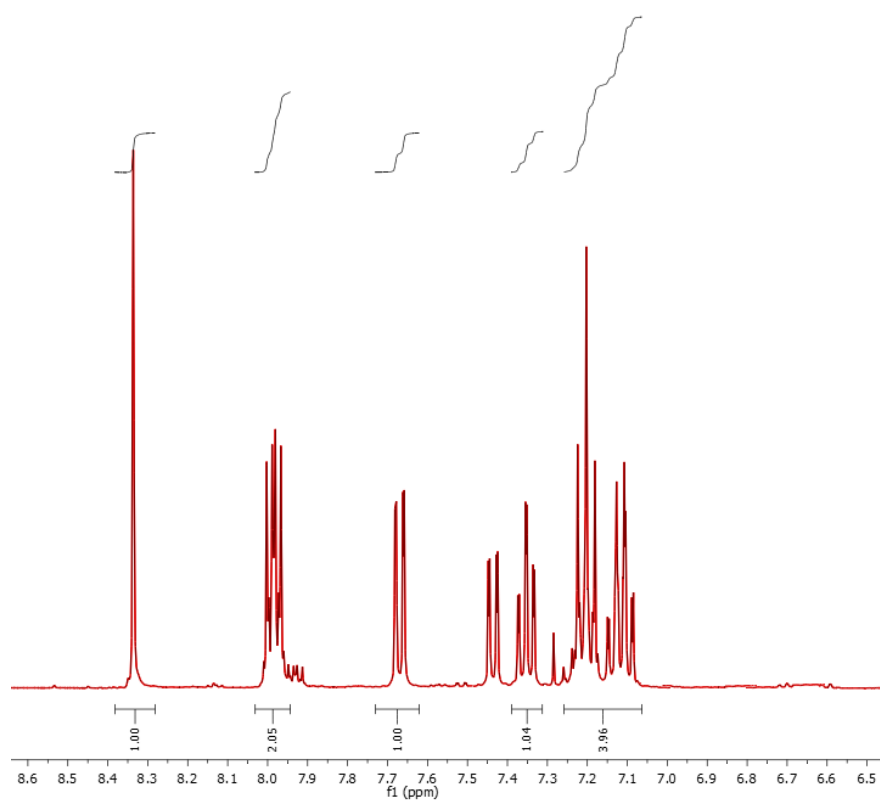

**FigureS1:13**      **Compound 28:** White solid.  $^1\text{H}$  NMR ( $\text{CDCl}_3$ )  $\delta$  8.33 (s, 1H), 7.60-7.67 (m, 2H), 7.49-7.53 (m, 2H), 7.41-7.47 (q, 1H), 7.16-7.21 (m 1H), 7.07-7.11 (m, 2H)

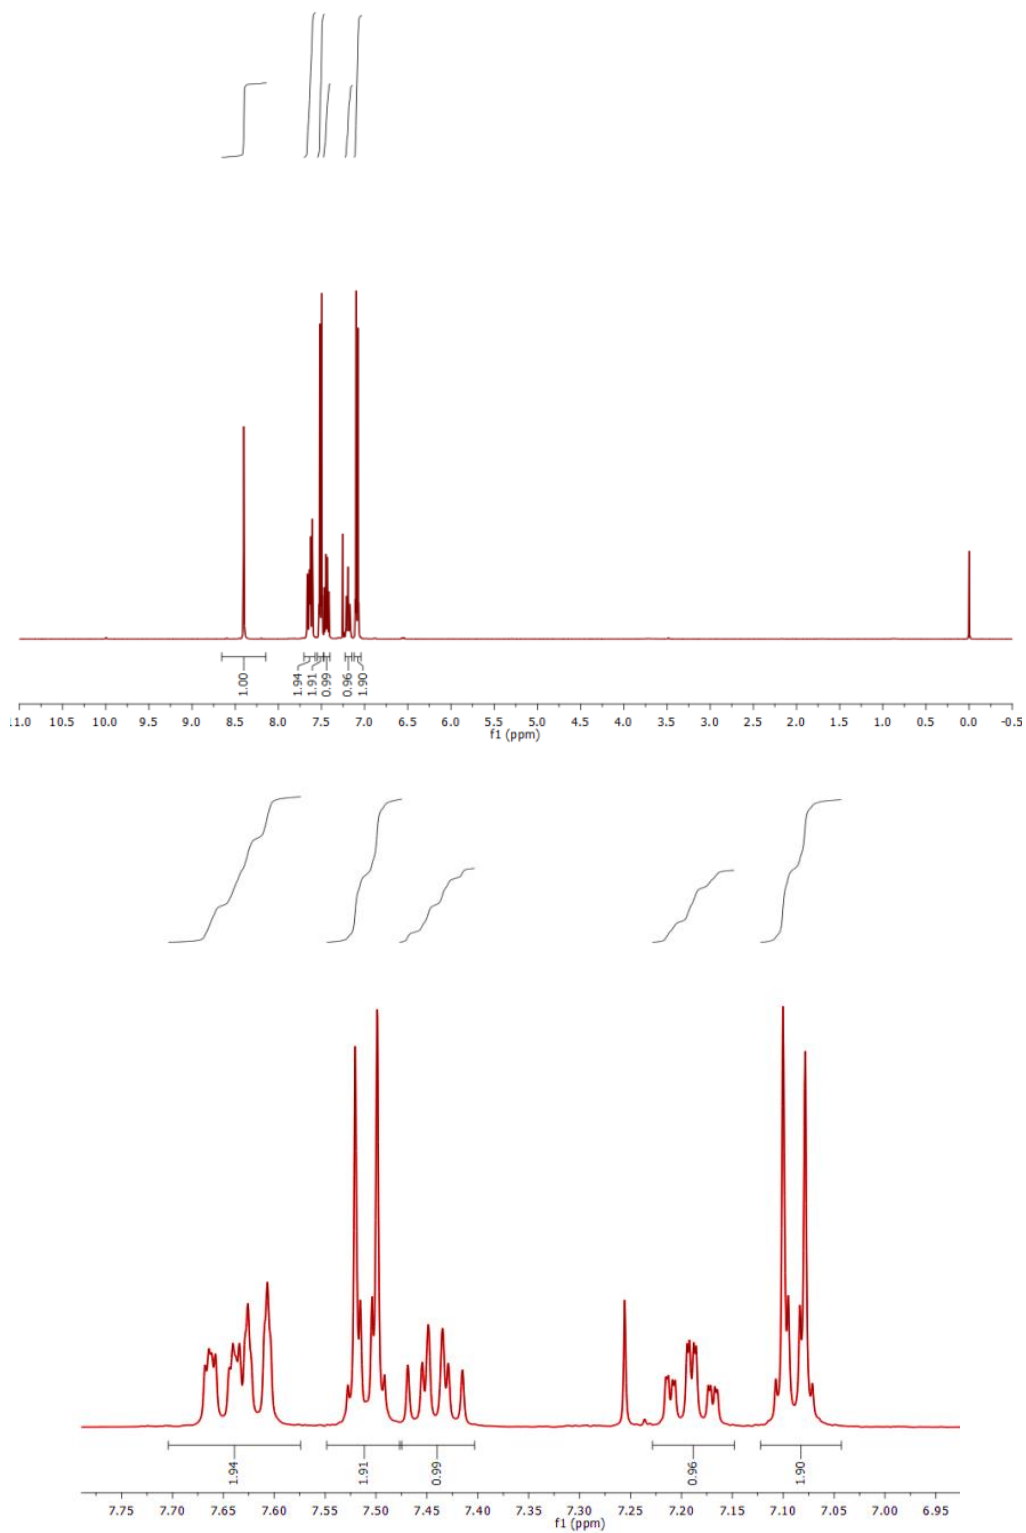

**FigureS1:14**      **Compound 29:** White solid.  $^1\text{H}$  NMR ( $\text{CDCl}_3$ )  $\delta$  8.49 (s, 1H), 8.14-8.15 (t, 1H), 7.83-7.85 (d, 1H), 7.63-7.66 (m, 1H), 7.36-7.40 (t, 1H), 7.15-7.24 (m, 4H)

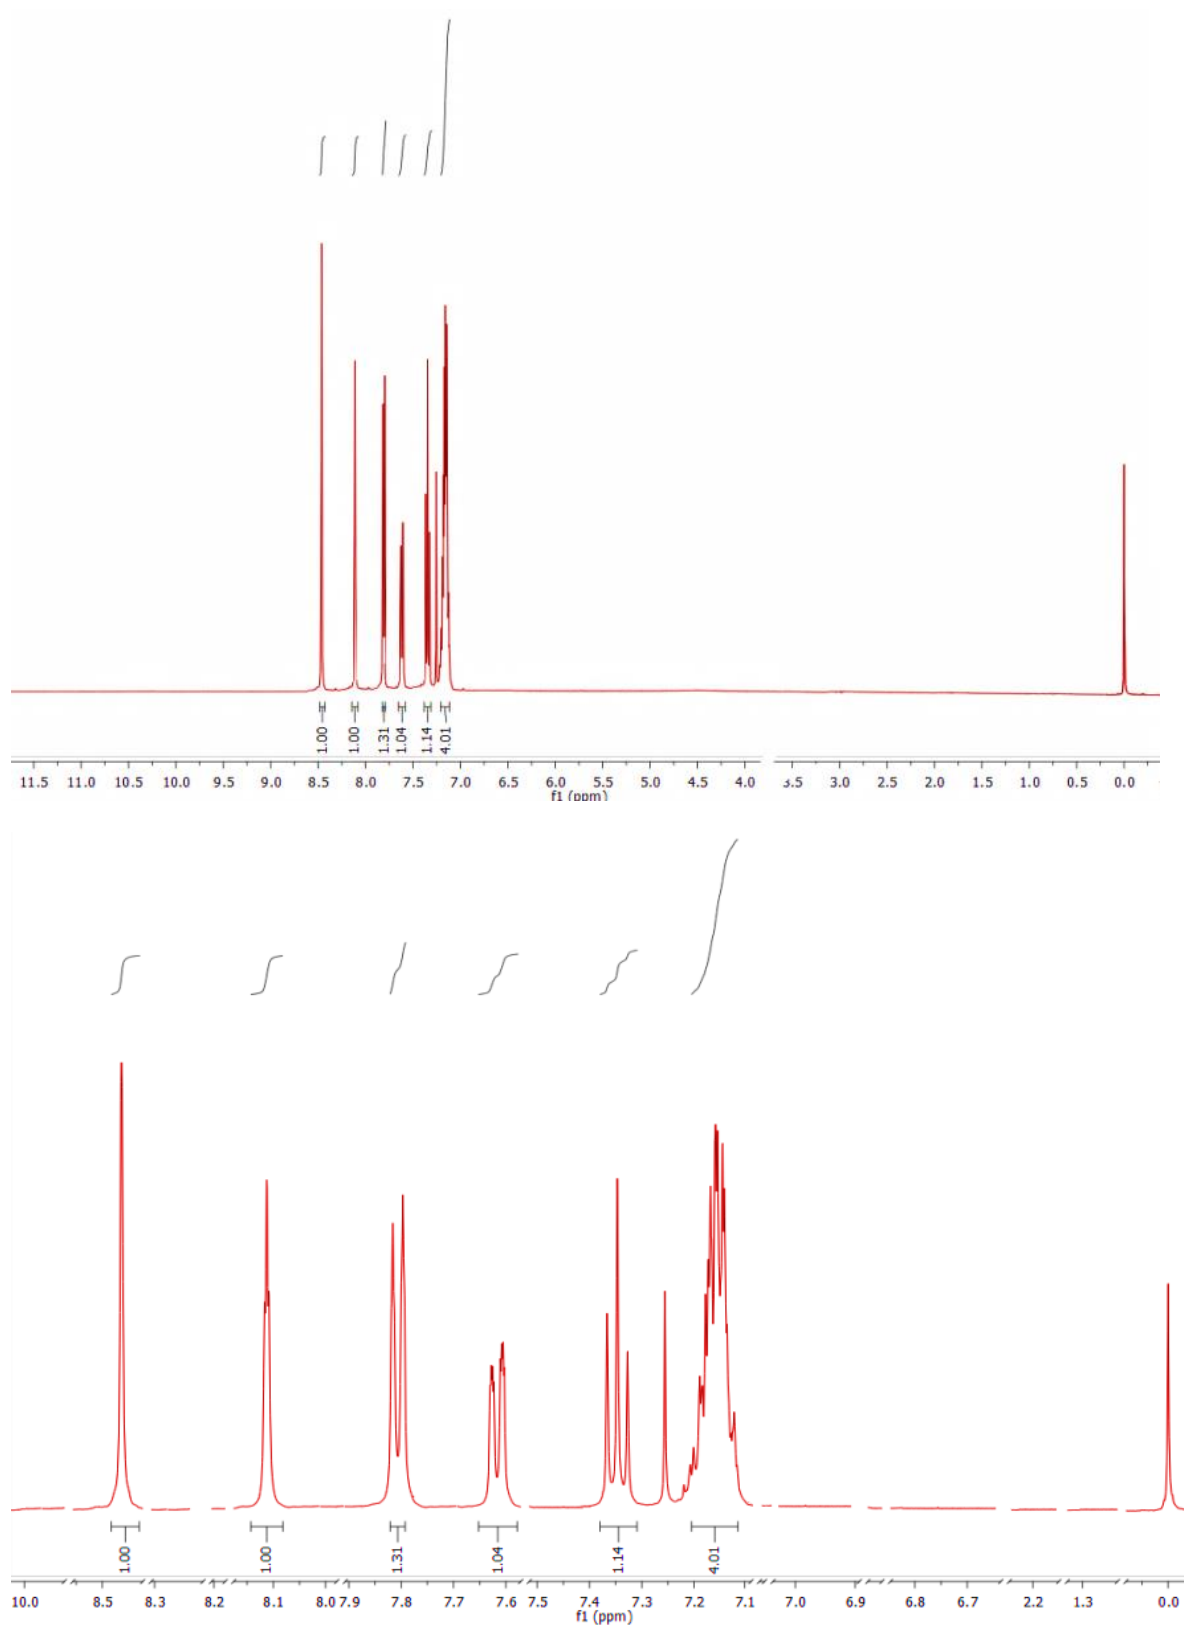

**FigureS1:15**      **Compound 30:** White solid.  $^1\text{H}$  NMR ( $\text{CDCl}_3$ )  $\delta$  8.49 (s, 1H), 7.66-7.77 (m, 3H), 7.45-7.51 (m, 1H), 7.33-7.38 (m, 1H), 7.21-7.26 (t, 1H), 7.02-7.05 (d, 1H)

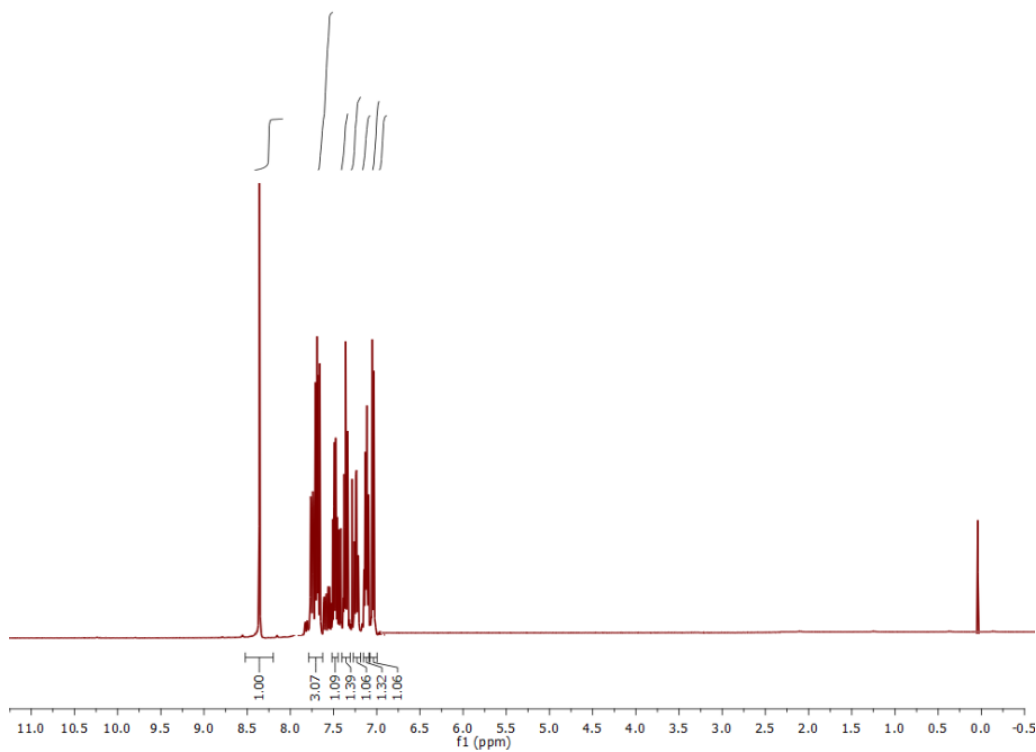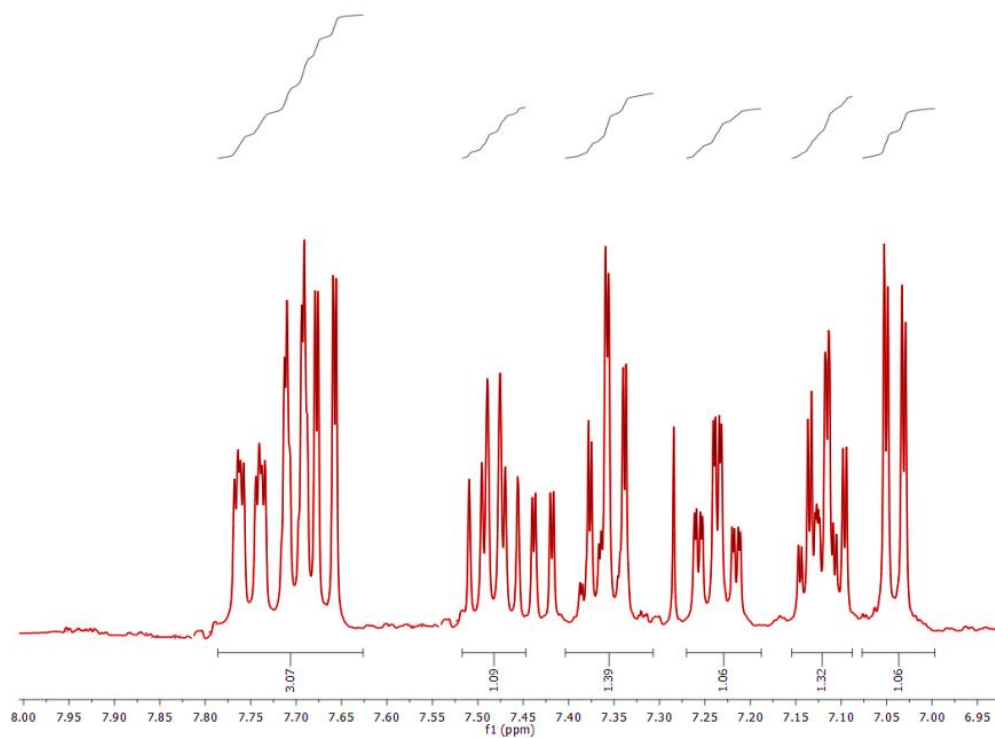

**FigureS1:16**      **Compound 31:** White solid.  $^1\text{H}$  NMR ( $\text{CDCl}_3$ )  $\delta$  8.76 (s, 1H), 8.16-8.21 (t, 1H), 7.47-7.55 (m, 3H), 7.11-7.29 (m, 4H),

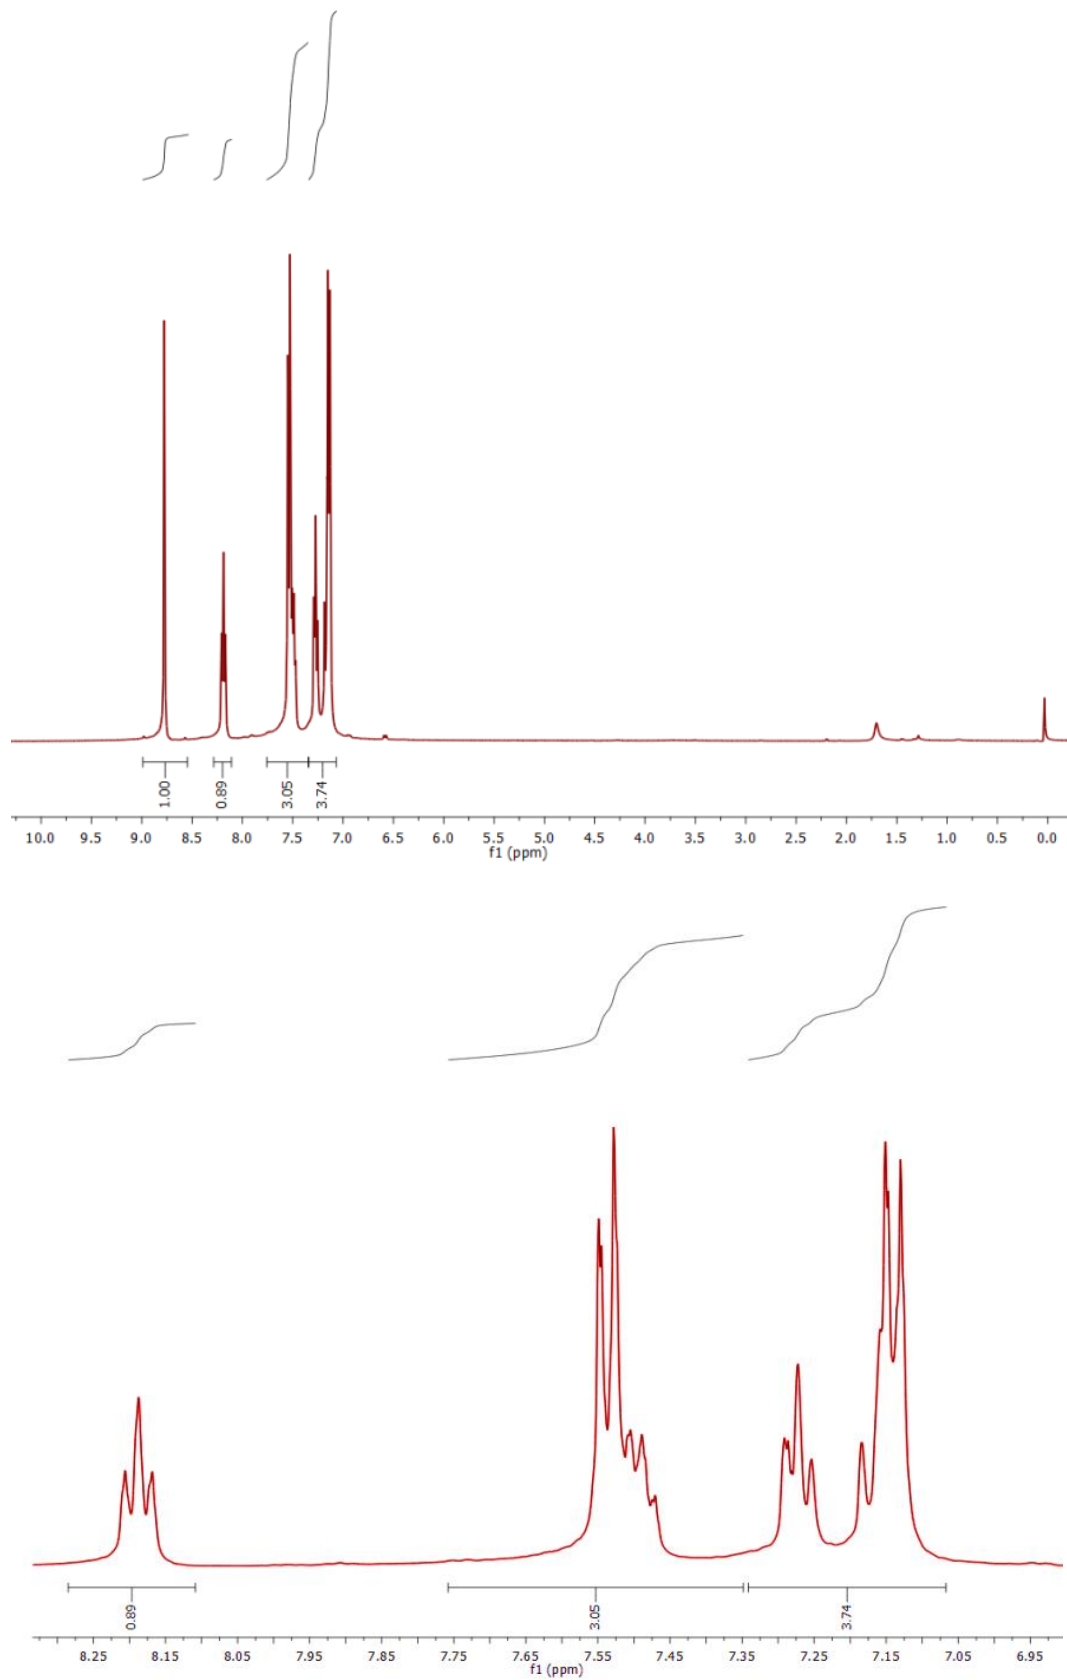



**FigureS1:17**      **Compound 32:** White solid.  $^1\text{H}$  NMR ( $\text{CDCl}_3$ )  $\delta$  8.78 (s, 1H), 8.16-8.20 (t, 1H), 7.47-7.54 (m, 1H), 7.39-7.41 (m, 2H), 7.14-7.30 (m, 4H),

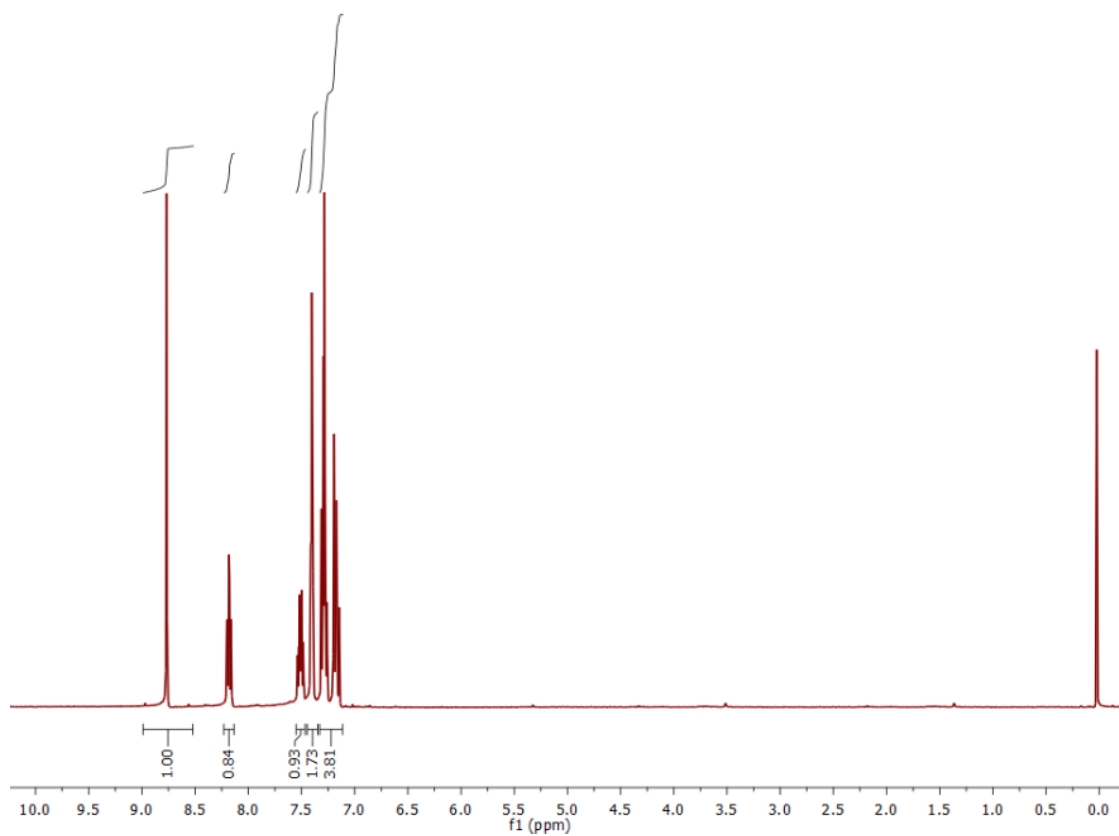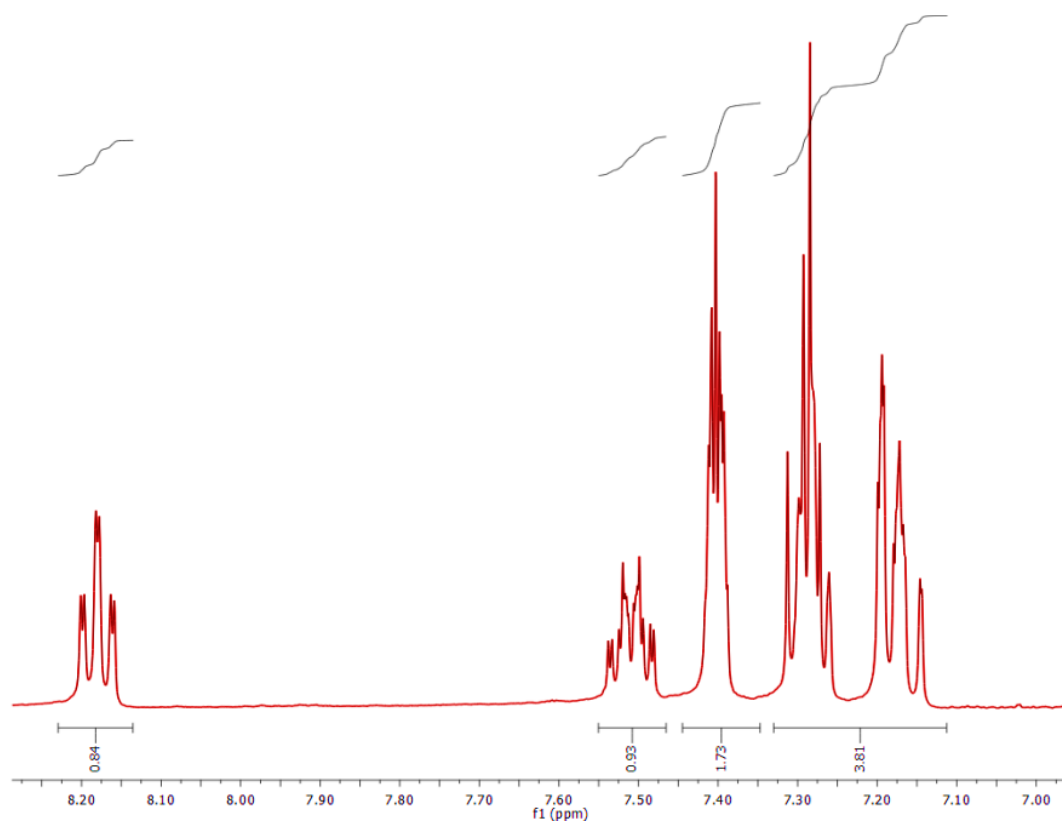

**FigureS1:18**      **Compound 33:** White solid.  $^1\text{H}$  NMR ( $\text{CDCl}_3$ )  $\delta$  8.71 (s, 1H), 8.28-8.32 (t, 1H), 7.66-7.68 (d, 1H), 7.28-7.44 (m, 3H), 7.06-7.19 (m, 3H),

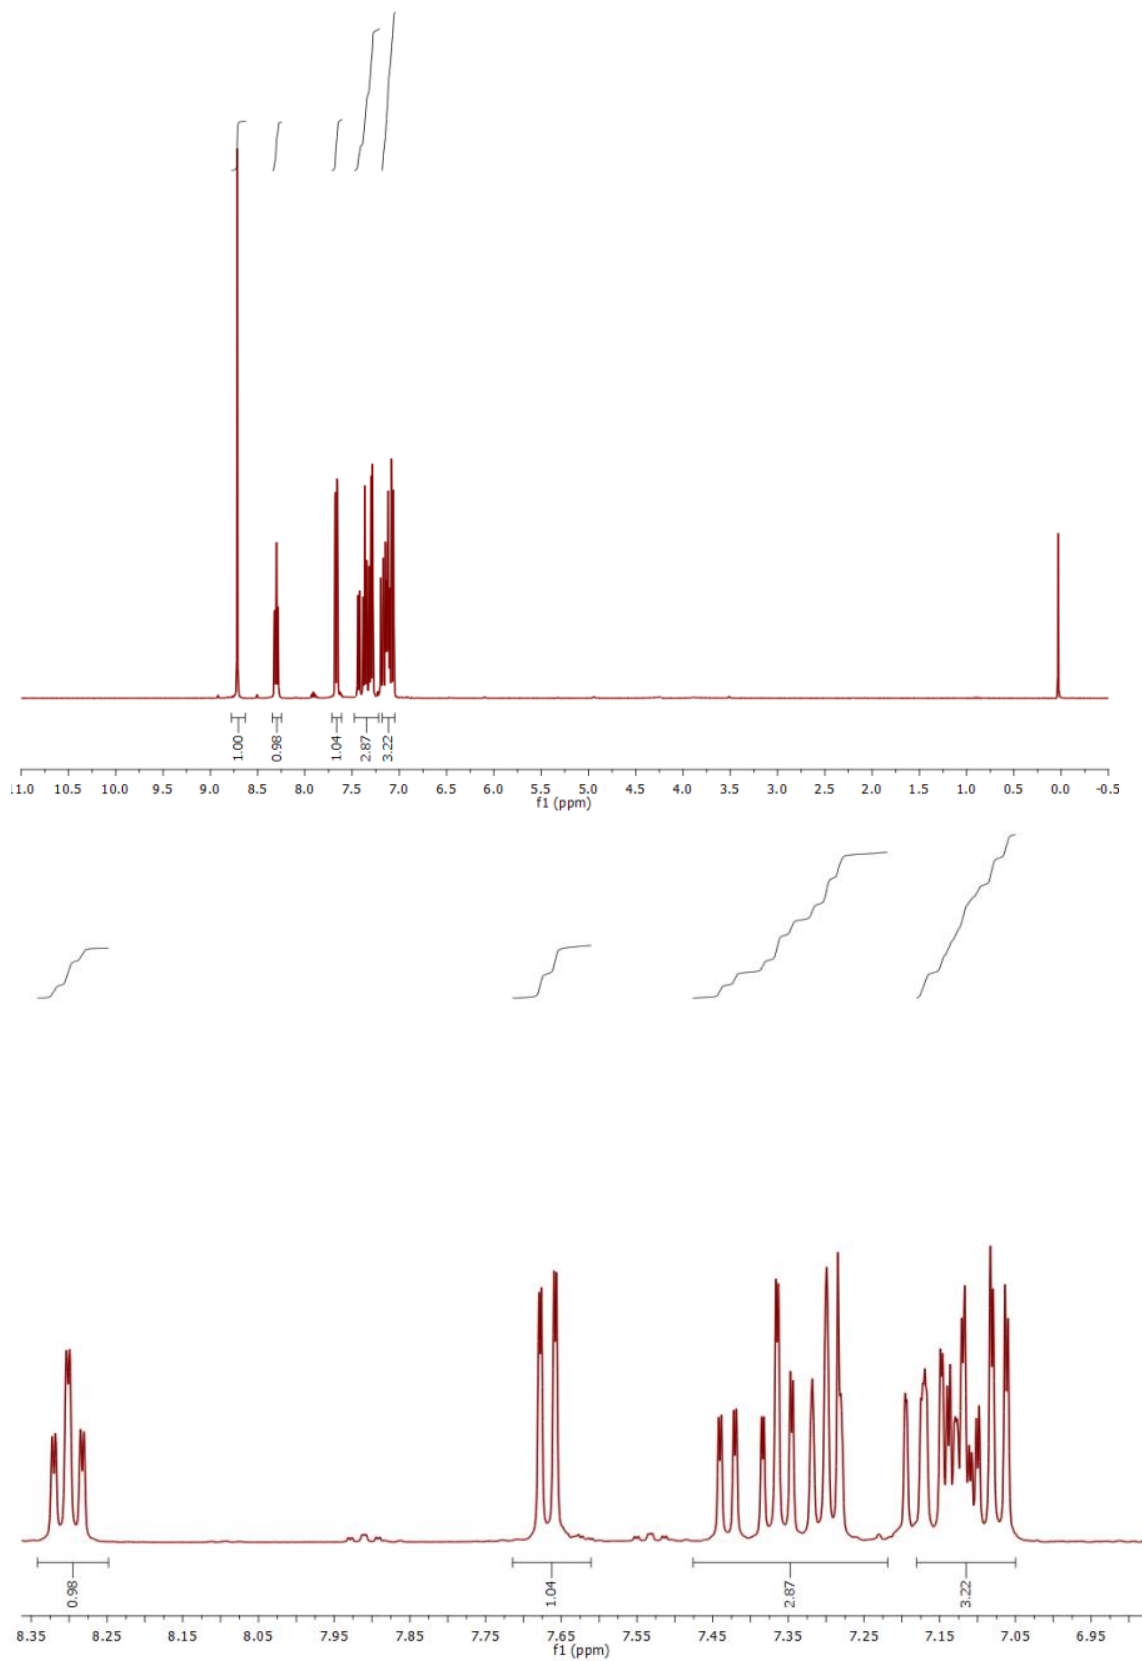

**FigureS1:19**      **Compound 34:** White solid.  $^1\text{H}$  NMR ( $\text{CDCl}_3$ )  $\delta$  8.40 (s, 1H), 7.90-7.94 (d, 2H), 7.44-7.44 (d, 2H), 7.18-7.21 (t, 2H), 7.06-7.10 (t, 2H)

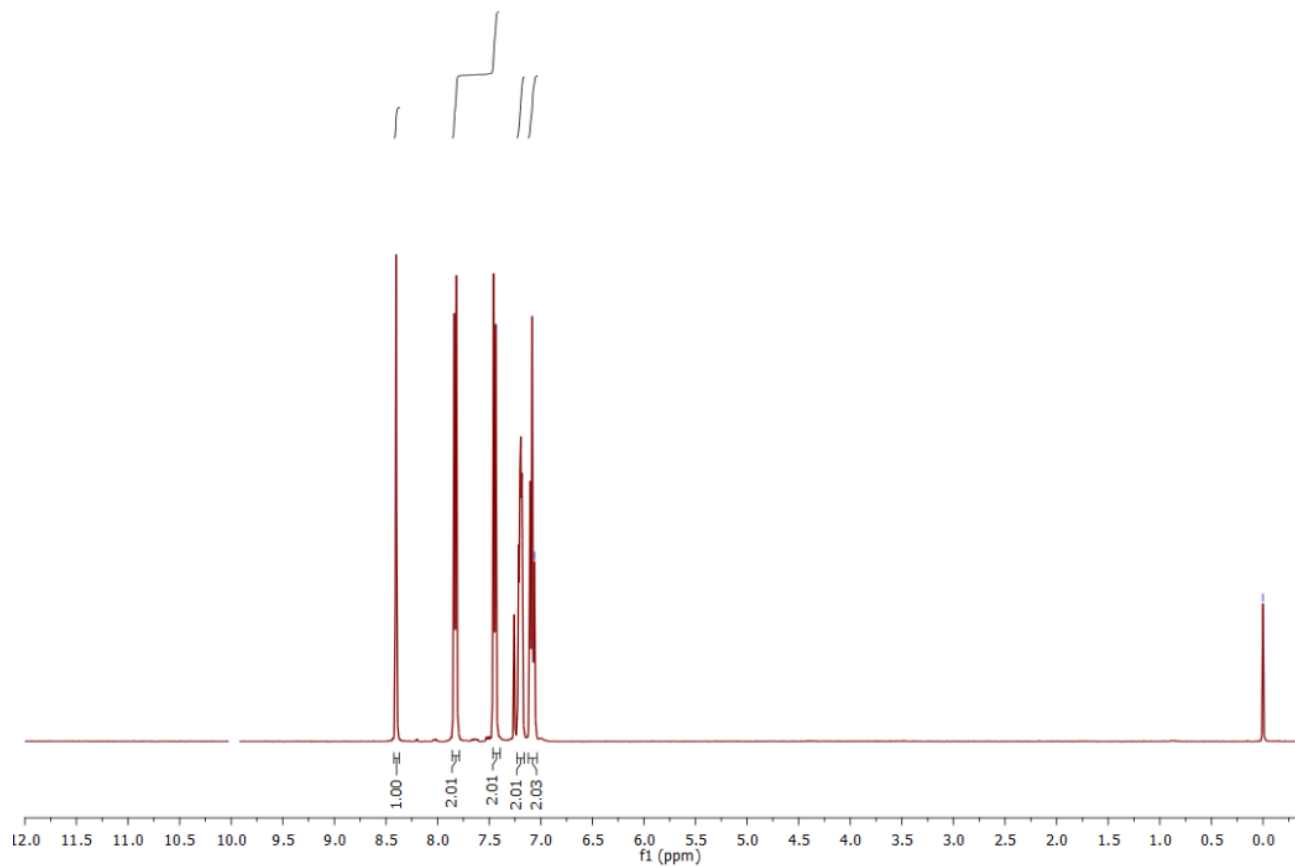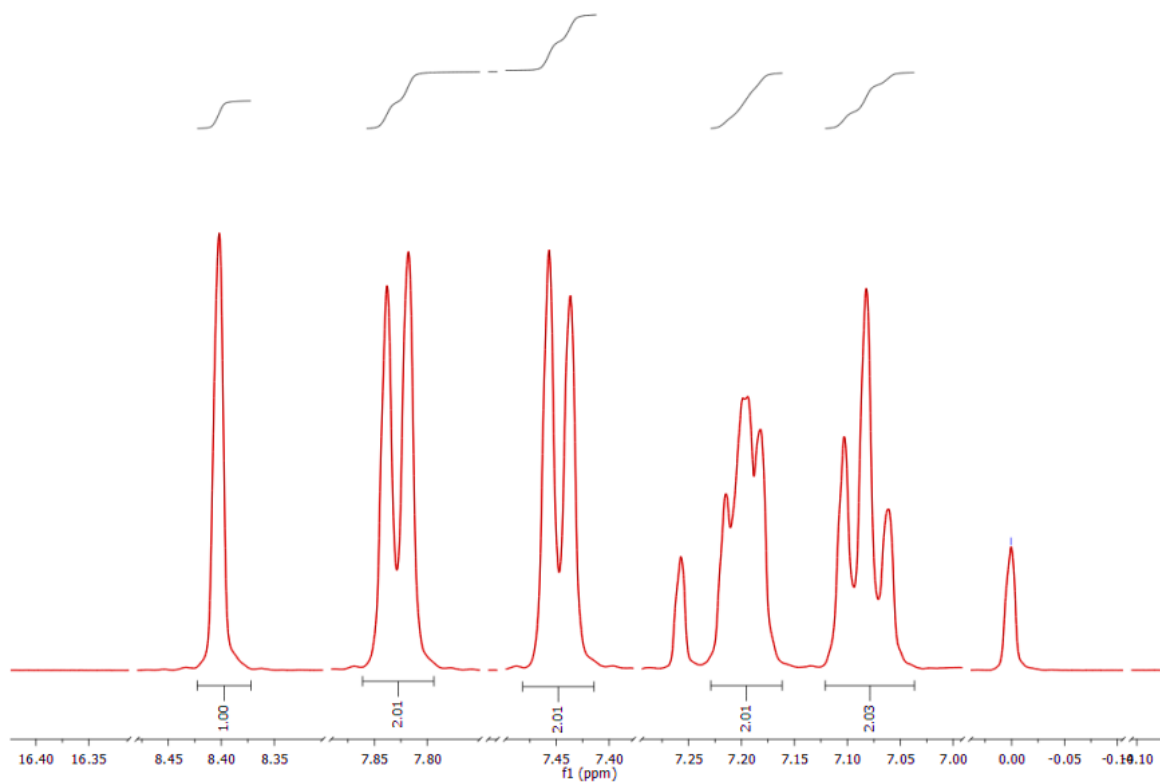

**FigureS1:20**      **Compound 35:** White solid.  $^1\text{H}$  NMR ( $\text{CDCl}_3$ )  $\delta$  8.39 (s, 1H), 7.83-7.85 (d, 2H), 7.45-7.46 (d, 2H), 7.32-7.37 (q, 1H), 6.91-6.99 (m, 3H)

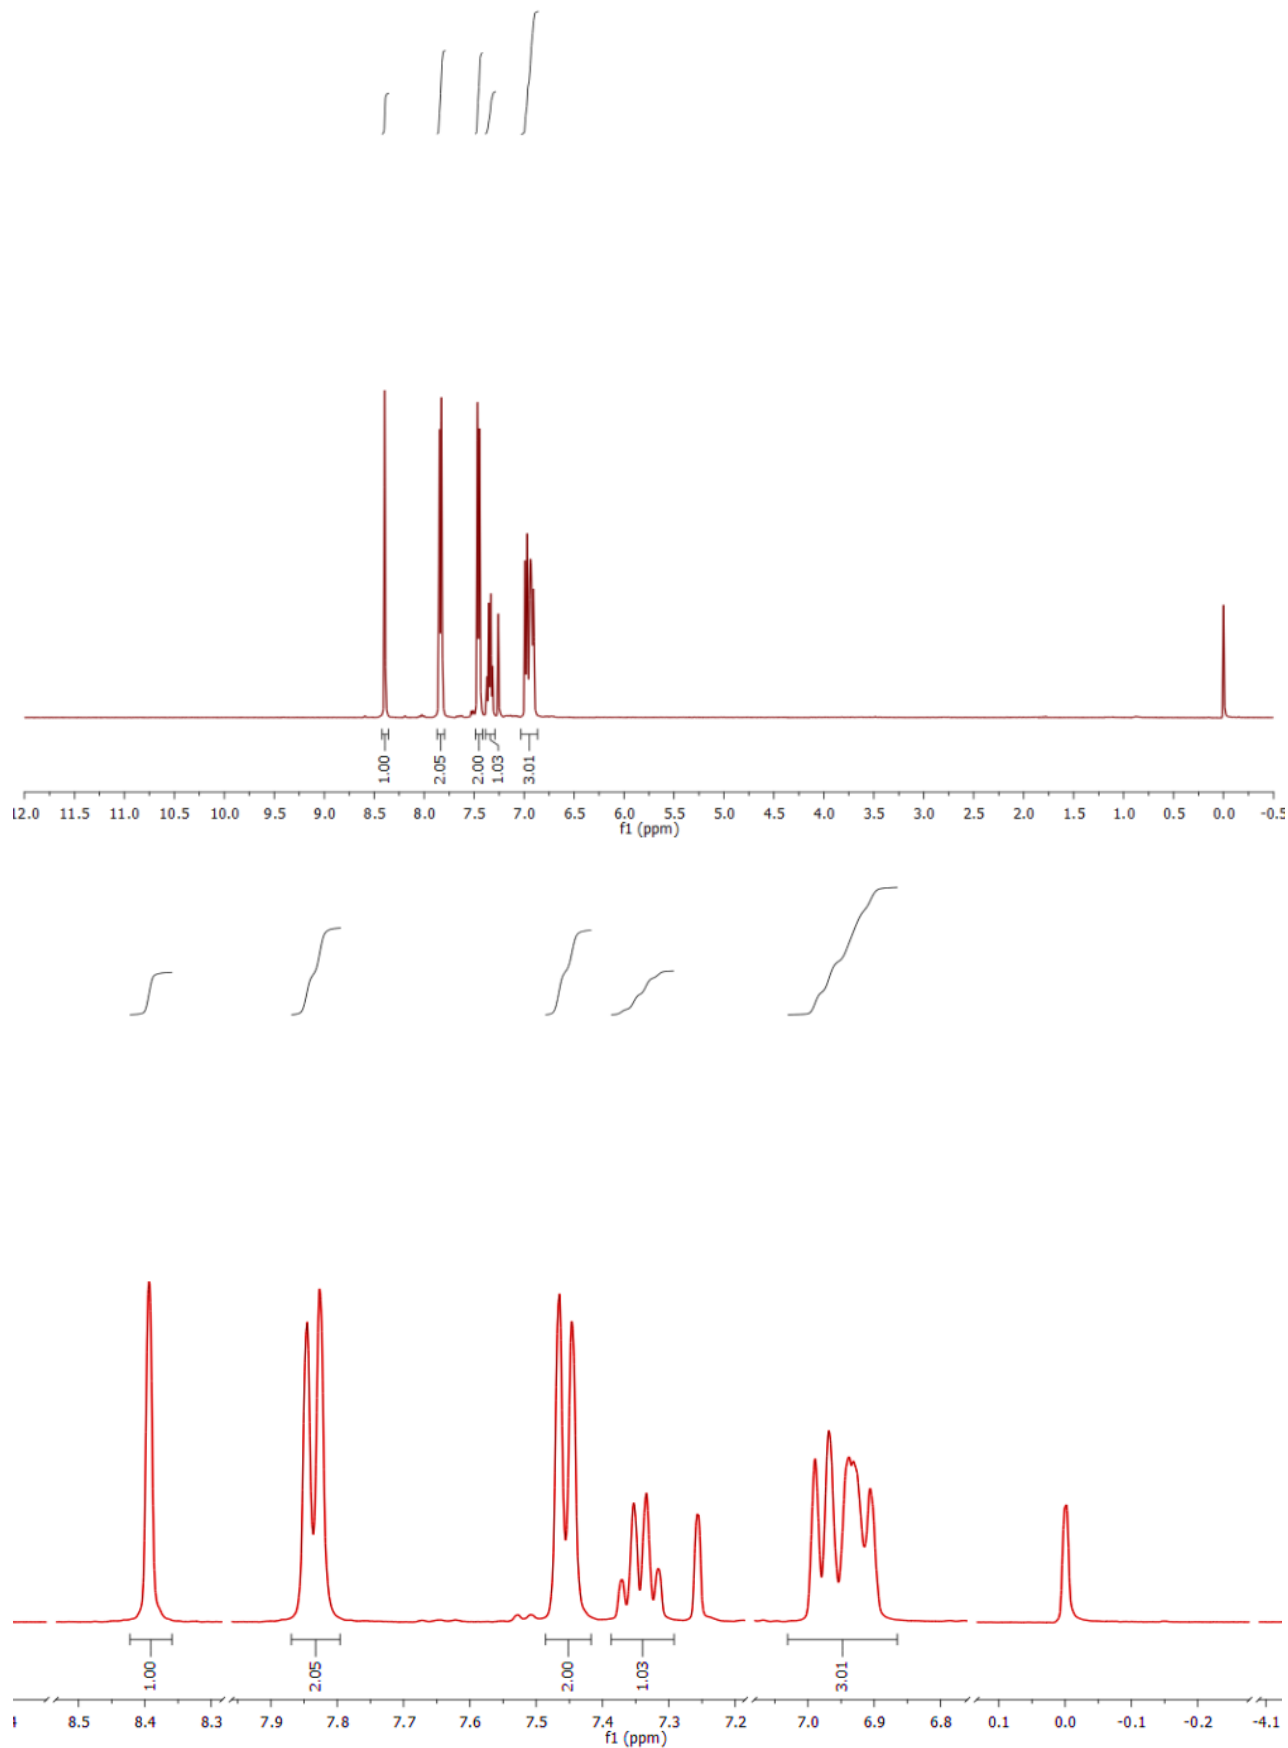

**FigureS1:21**     **Compound 36:** White solid.  $^1\text{H}$  NMR ( $\text{CDCl}_3$ )  $\delta$  8.49 (s, 1H), 7.85-7.88 (d, 2H), 7.44-7.47 (d, 2H), 7.12-7.21 (m, 4H)

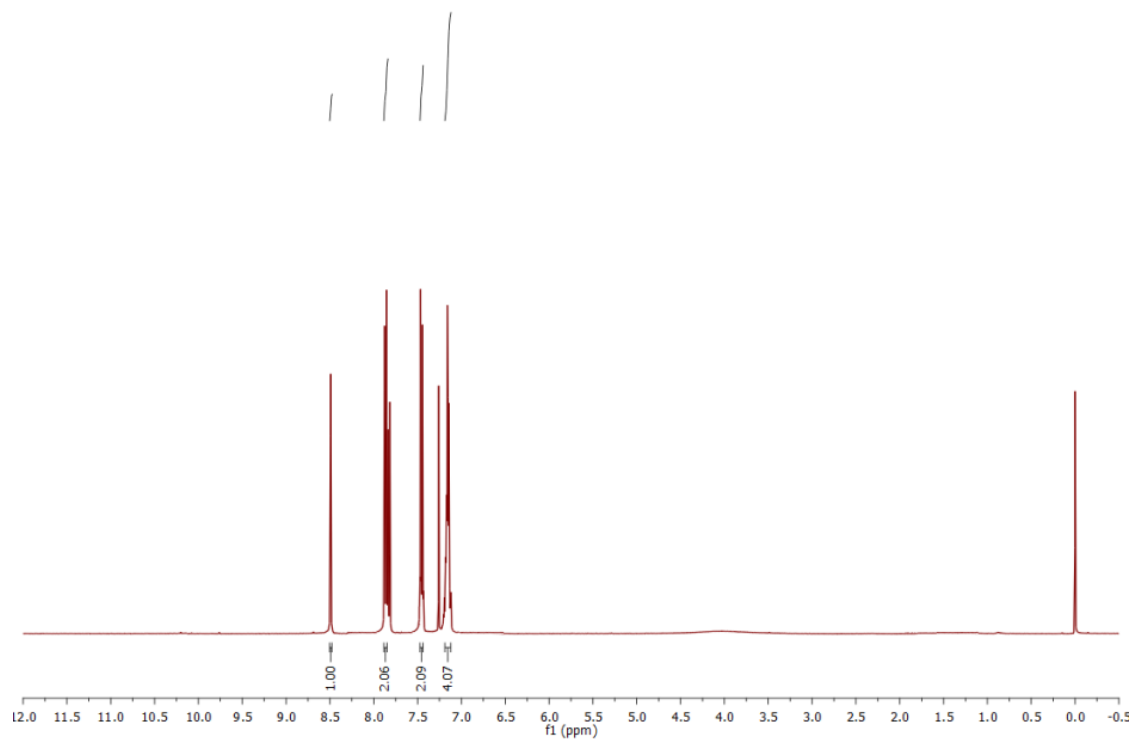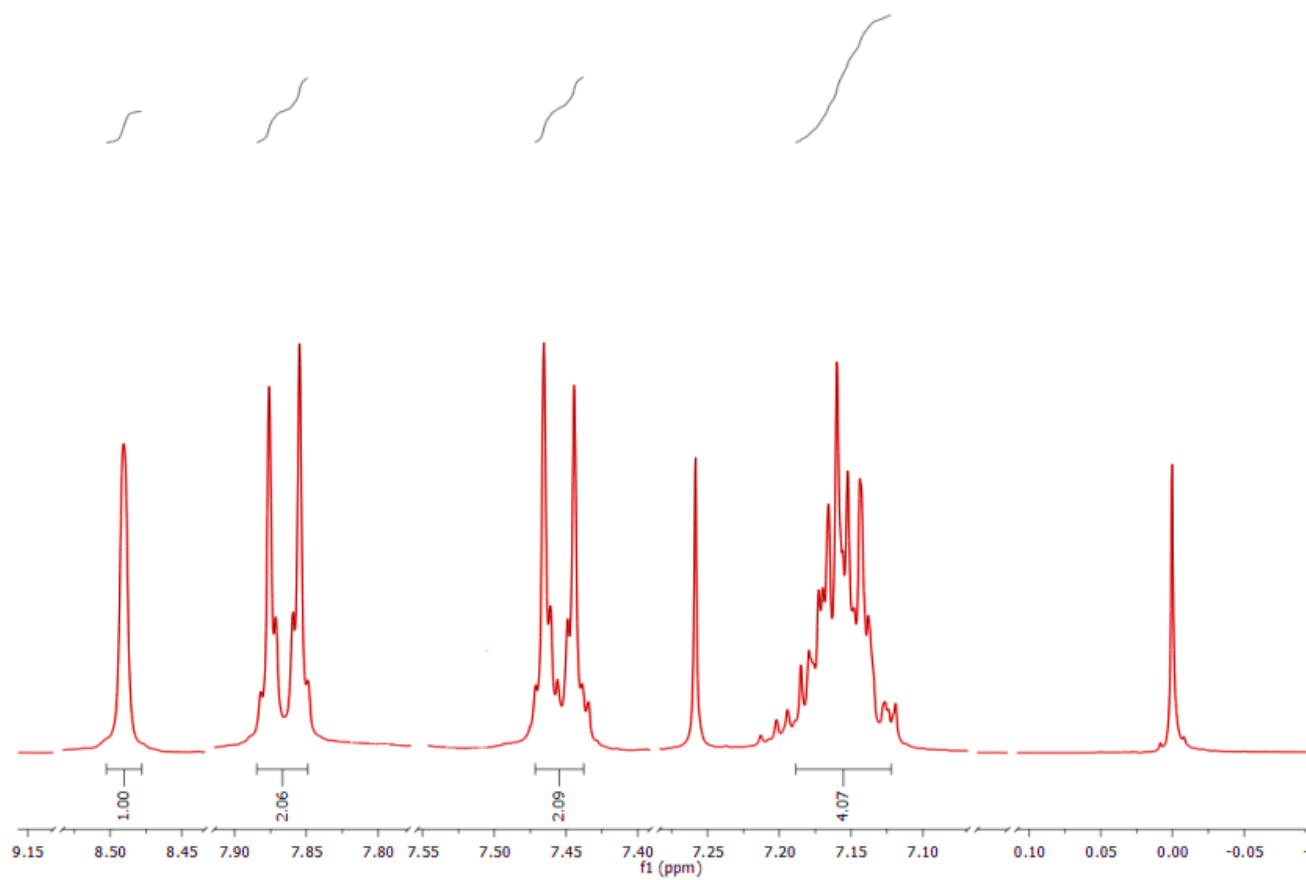

**FigureS1:22**      **Compound 37:** White solid.  $^1\text{H}$  NMR ( $\text{CDCl}_3$ )  $\delta$  8.39 (s, 1H), 7.92-7.93 (t, 1H), 7.72-7.74 (dt, 1H), 7.38-7.47 (m, 2H), 7.19-7.22 (m, 2H), 7.06-7.12 (m, 2H)

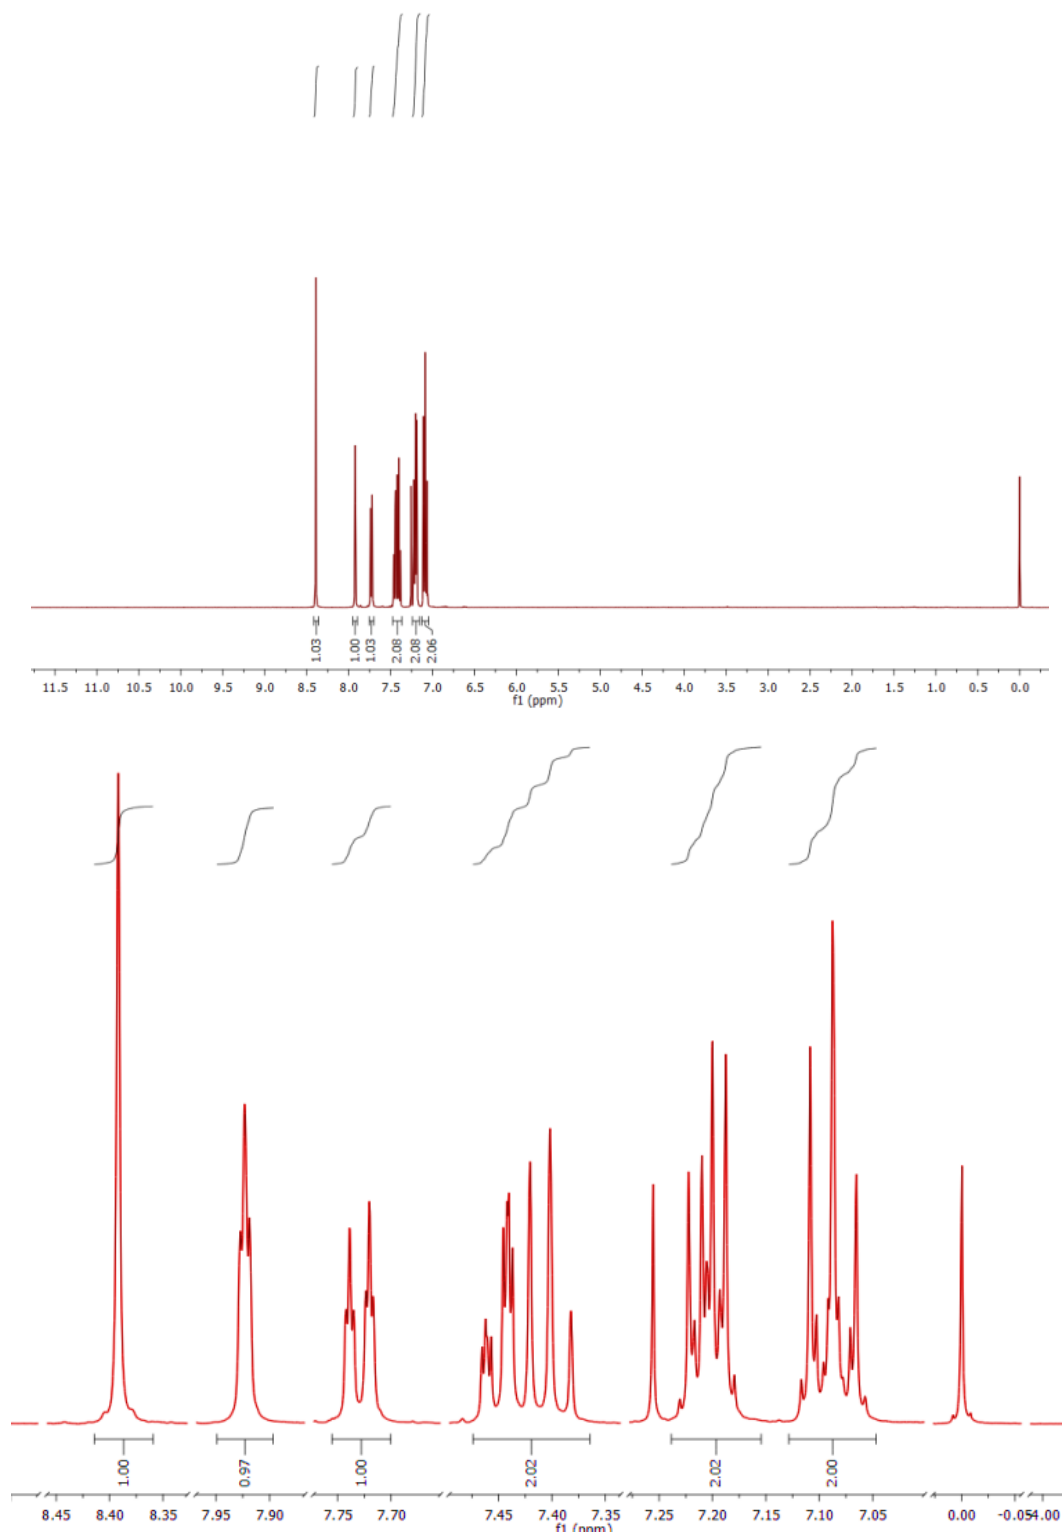

**FigureS1:23**      **Compound 38:** White solid.  $^1\text{H}$  NMR ( $\text{CDCl}_3$ )  $\delta$  8.75 (s, 1H), 8.14-8.18 (m, 1H), 7.44-7.50(m, 1H), 7.34-7.38 (dt, 2H), 7.23-7.27 (t, 1H), 7.11-7.19 (m,3H)

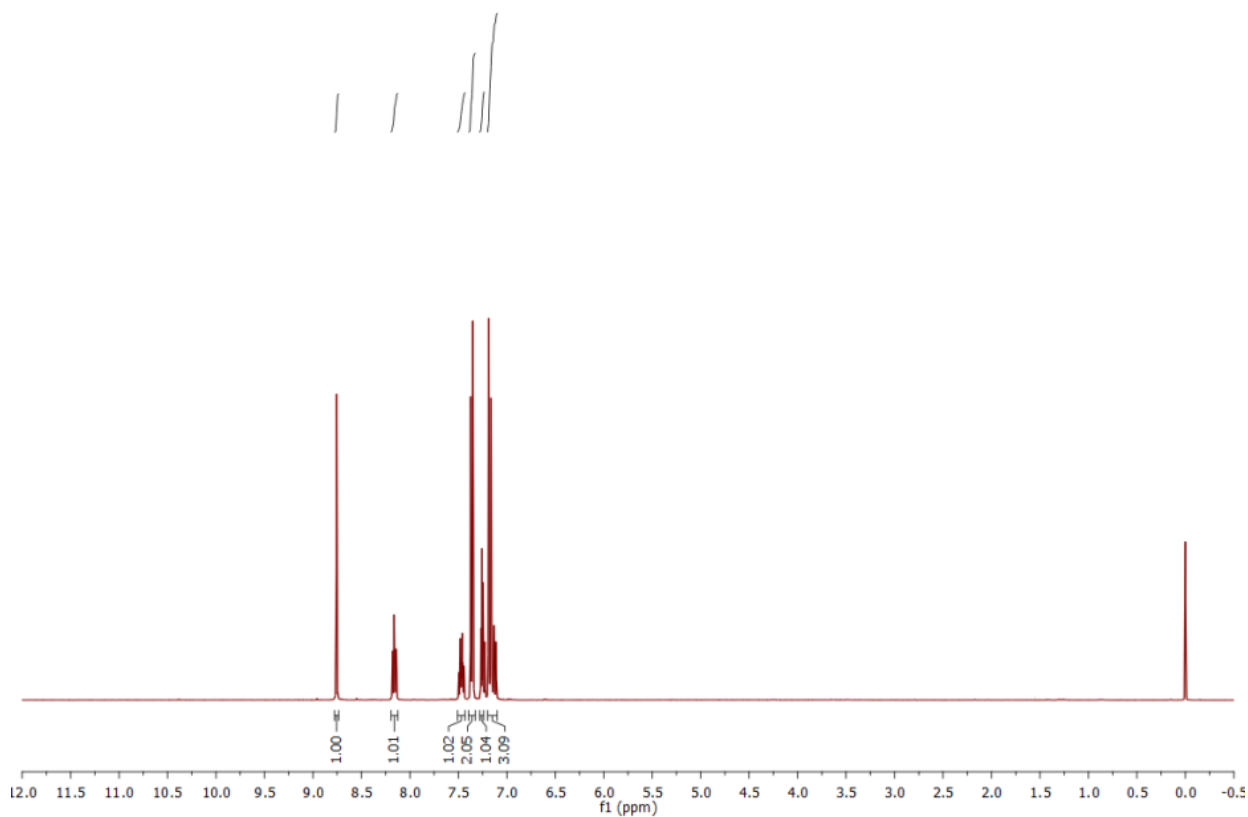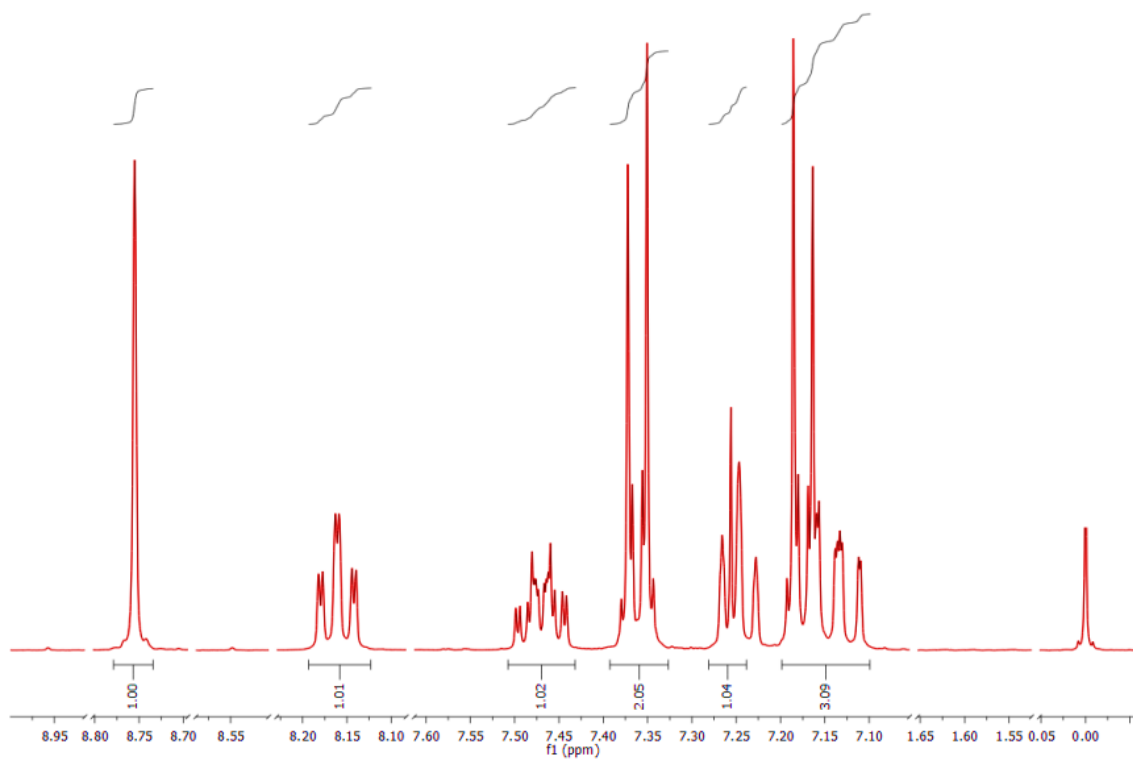

**FigureS1:24**      **Compound 39:** White solid.  $^1\text{H}$  NMR ( $\text{CDCl}_3$ )  $\delta$  8.48 (s, 1H), 7.95-7.96 (t, 1H), 7.75-7.77 (dt, 1H), 7.45-7.48 (m, 1H), 7.39-7.43 (t, 1H), 7.12-7.22 (m, 4H)

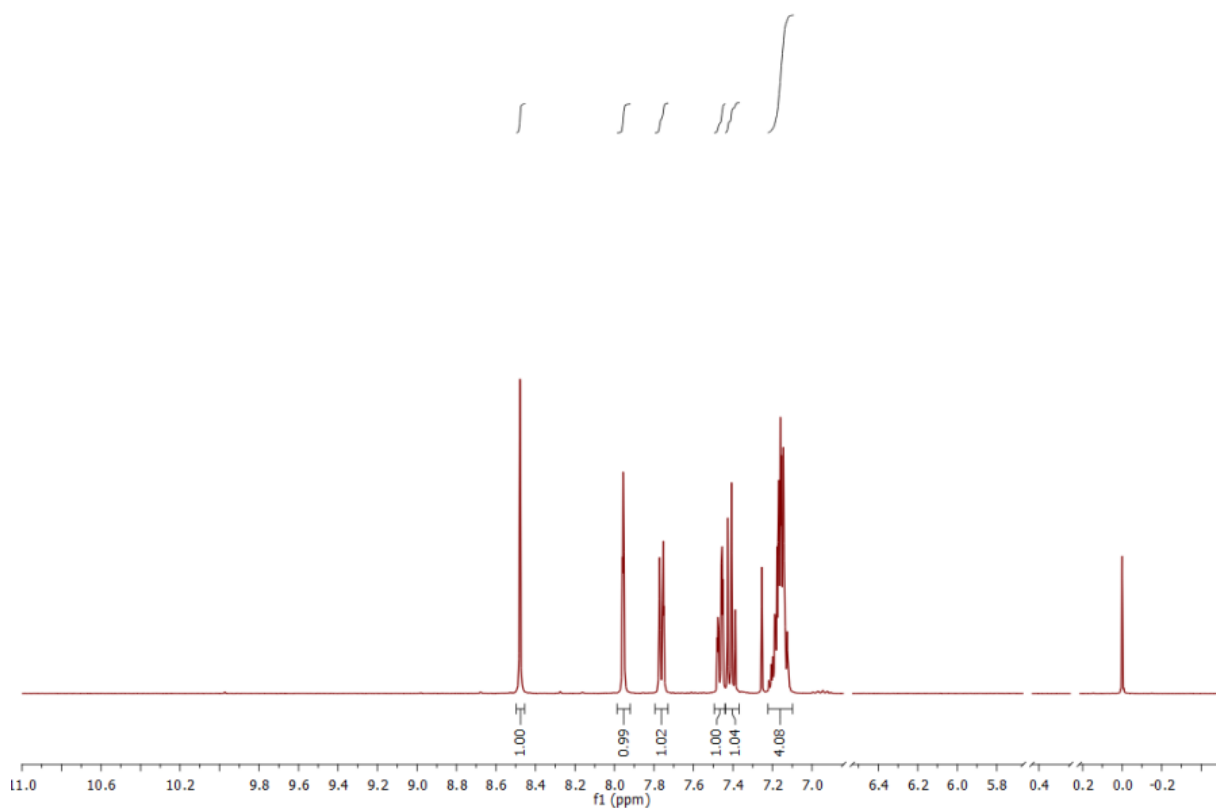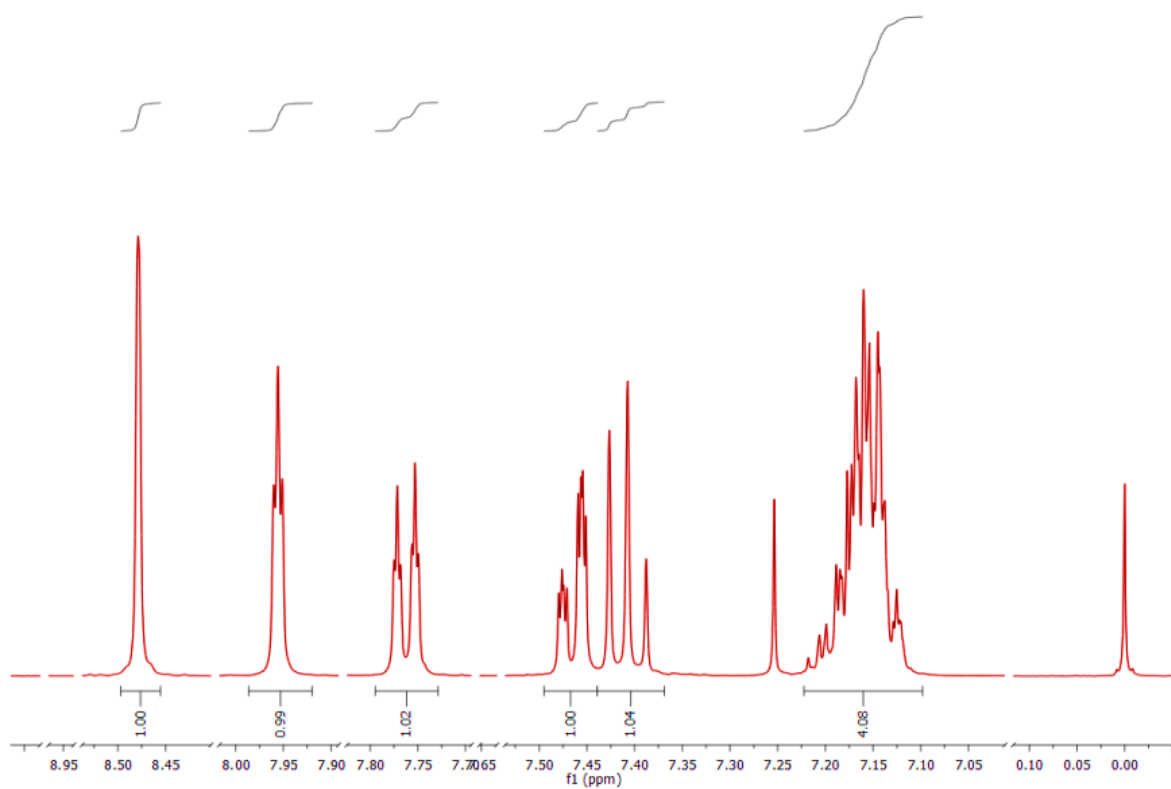



**FigureS1:25**      **Compound 40:** White solid.  $^1\text{H}$  NMR ( $\text{CDCl}_3$ )  $\delta$  8.90 (s, 1H), 8.21-8.23 (dd, 1H), 7.34-7.44 (m, 3H), 7.21-7.27 (m, 2H), 7.06-7.12 (m, 2H)

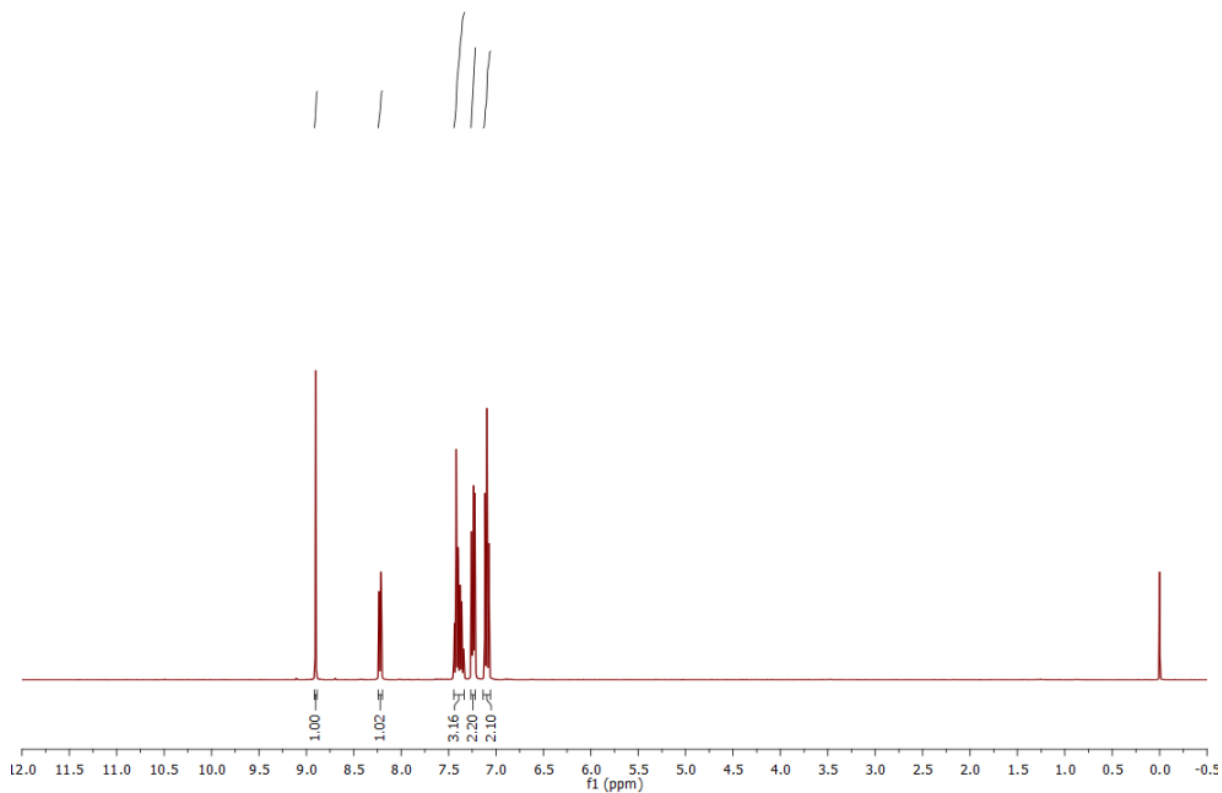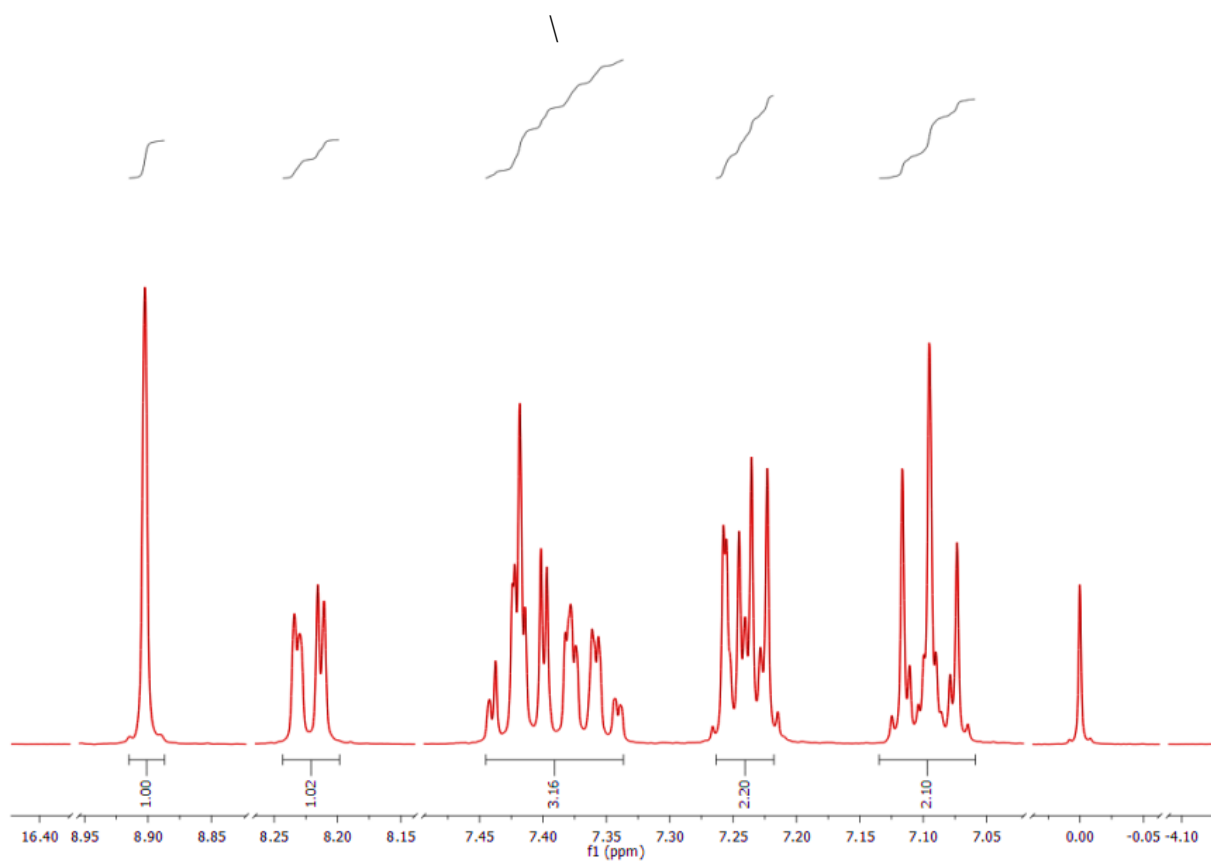

**FigureS1:26**      **Compound 41:** White solid.  $^1\text{H}$  NMR ( $\text{CDCl}_3$ )  $\delta$  8.90 (s, 1H), 8.21-8.24 (m, 1H), 7.33-7.45 (m, 4H), 7.00-7.03 (m, 1H), 6.94-6.18 (m, 2H)

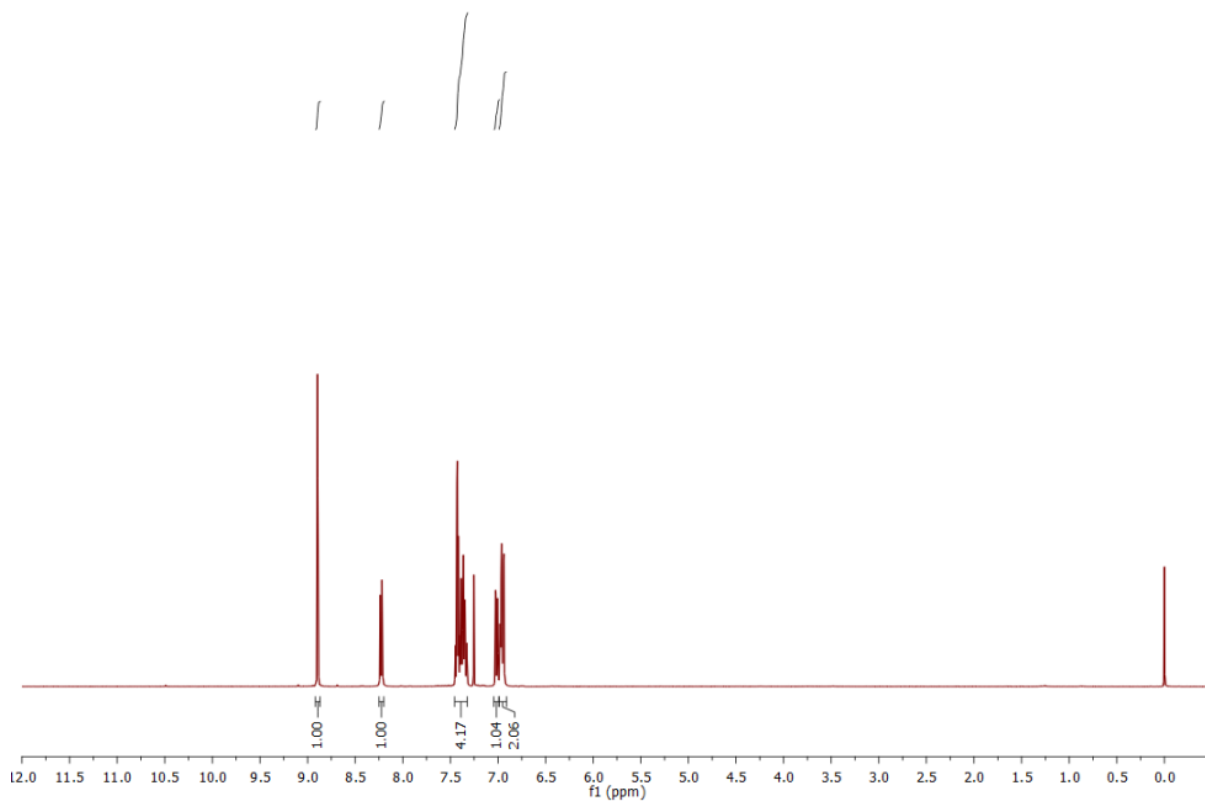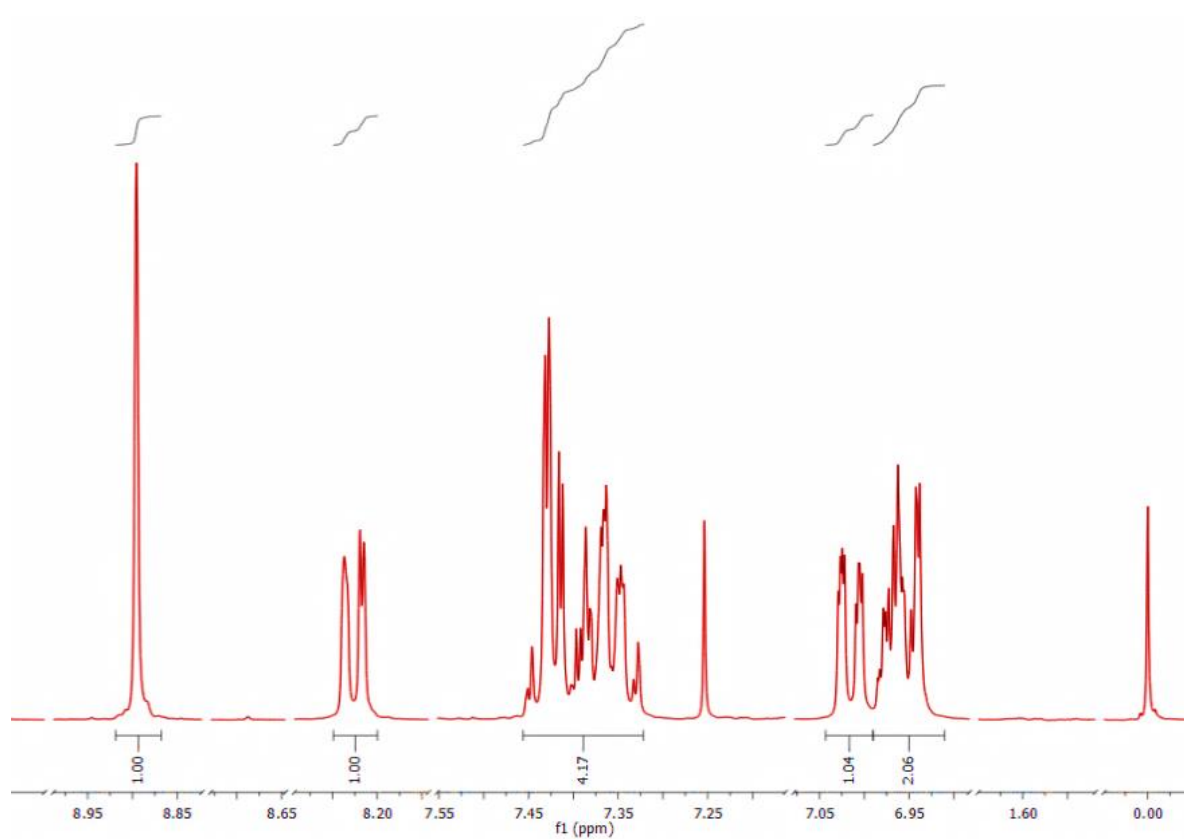

**FigureS1:27**      **Compound 42:** White solid.  $^1\text{H}$  NMR ( $\text{CDCl}_3$ )  $\delta$  8.72 (s, 1H), 8.23-8.28 (td, 1H), 7.43-7.52 (m, 2H), 7.25-7.30 (m, 2H), 7.12-7.18 (m, 2H), 7.04-7.06 (dd, 1H)

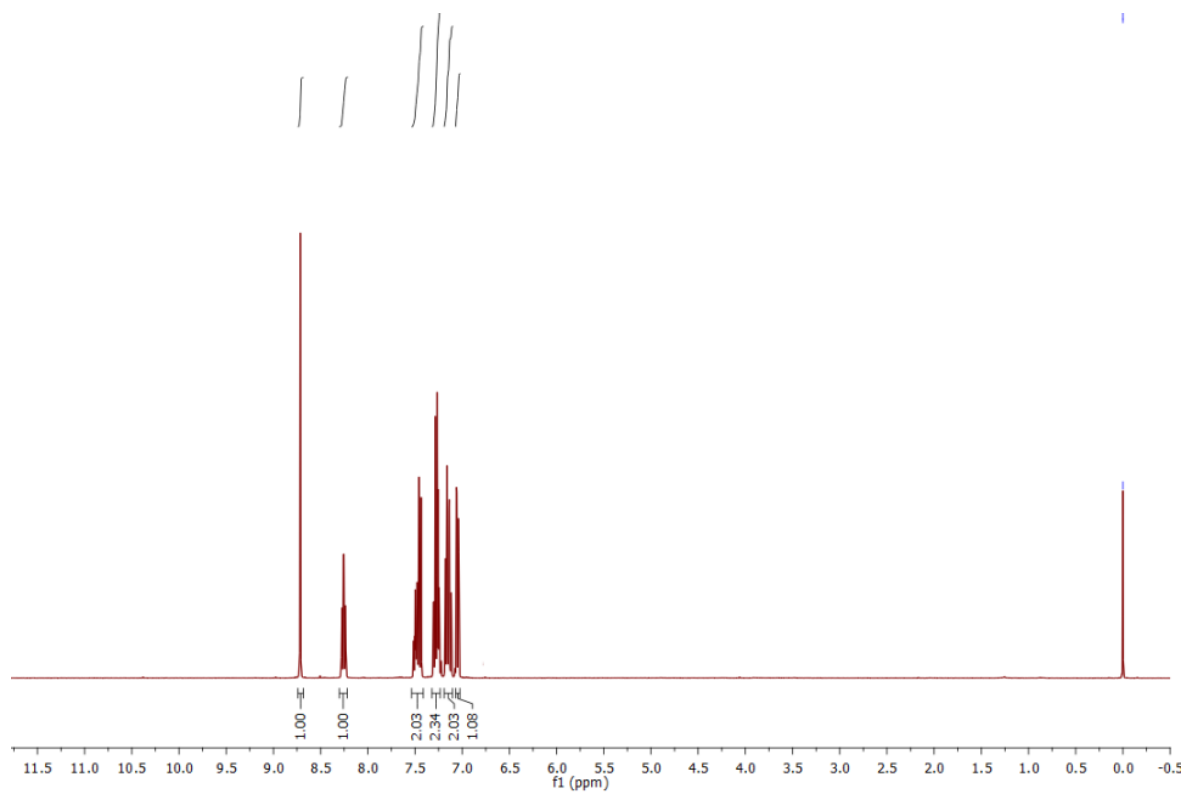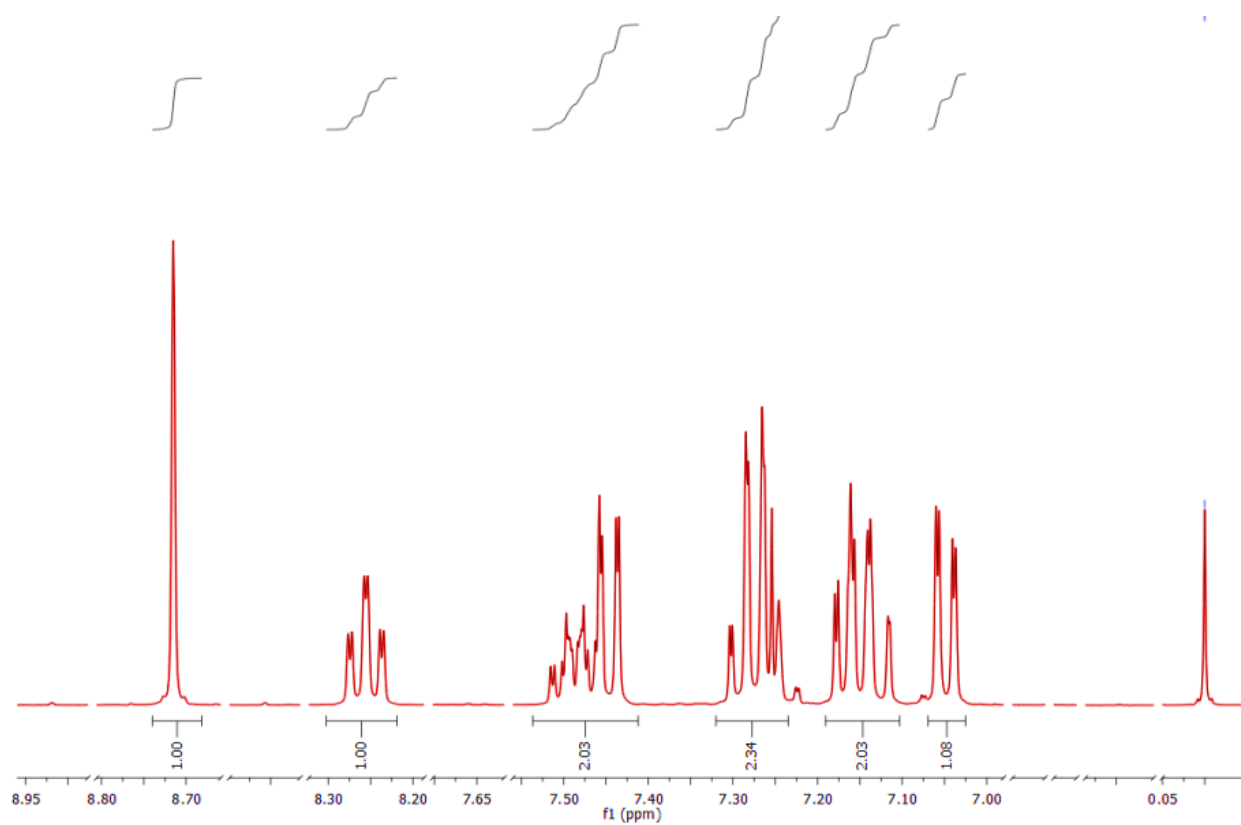

**FigureS1:28**      **Compound 43:** White solid.  $^1\text{H}$  NMR ( $\text{CDCl}_3$ )  $\delta$  8.39 (s, 1H), 7.87-7.92 (m, 2H), 7.33-7.37 (m, 2H), 7.12-7.19 (m, 4H)

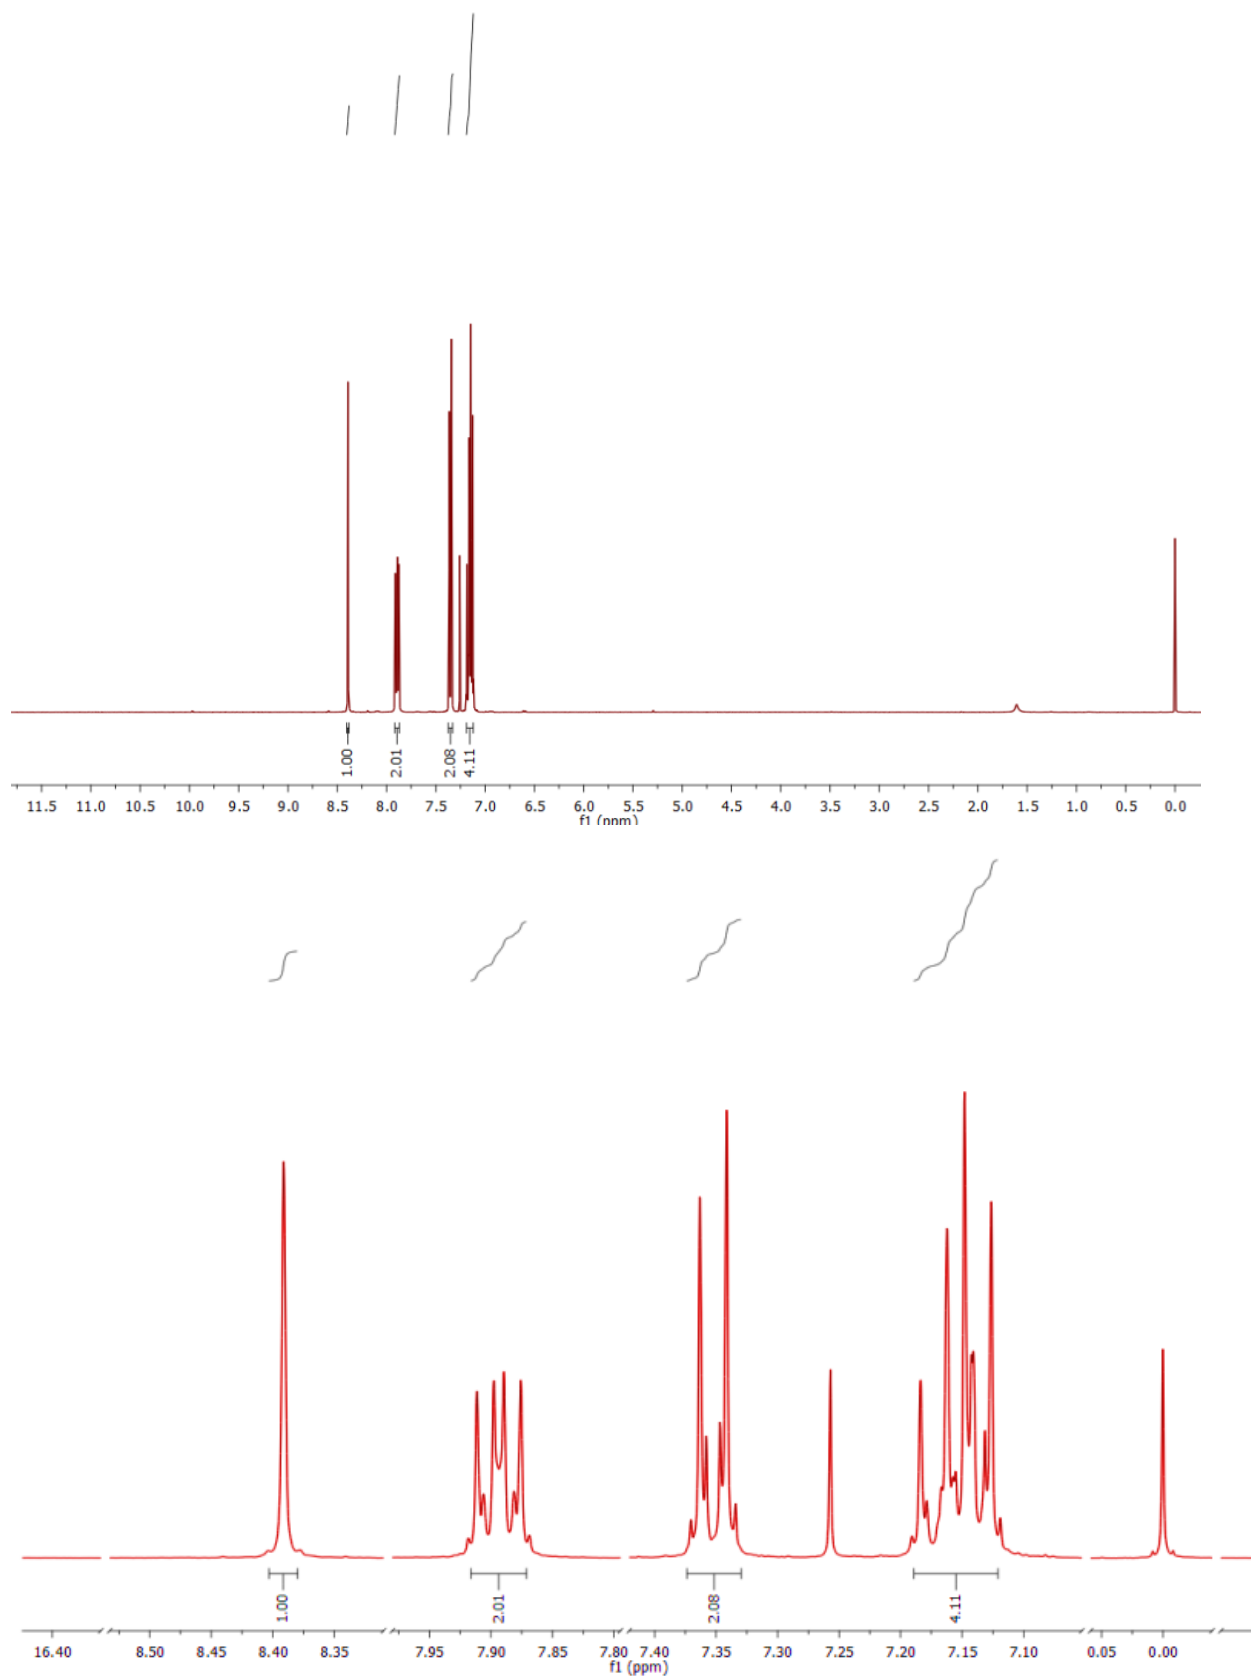

**FigureS1:29**      **Compound 44:** White solid.  $^1\text{H}$  NMR ( $\text{CDCl}_3$ )  $\delta$  8.38 (s, 1H), 7.88-7.91 (t, 2H), 7.29-7.33 (t, 1H), 7.14-7.21 (q, 4H), 7.14-7.21 (d, 1H)

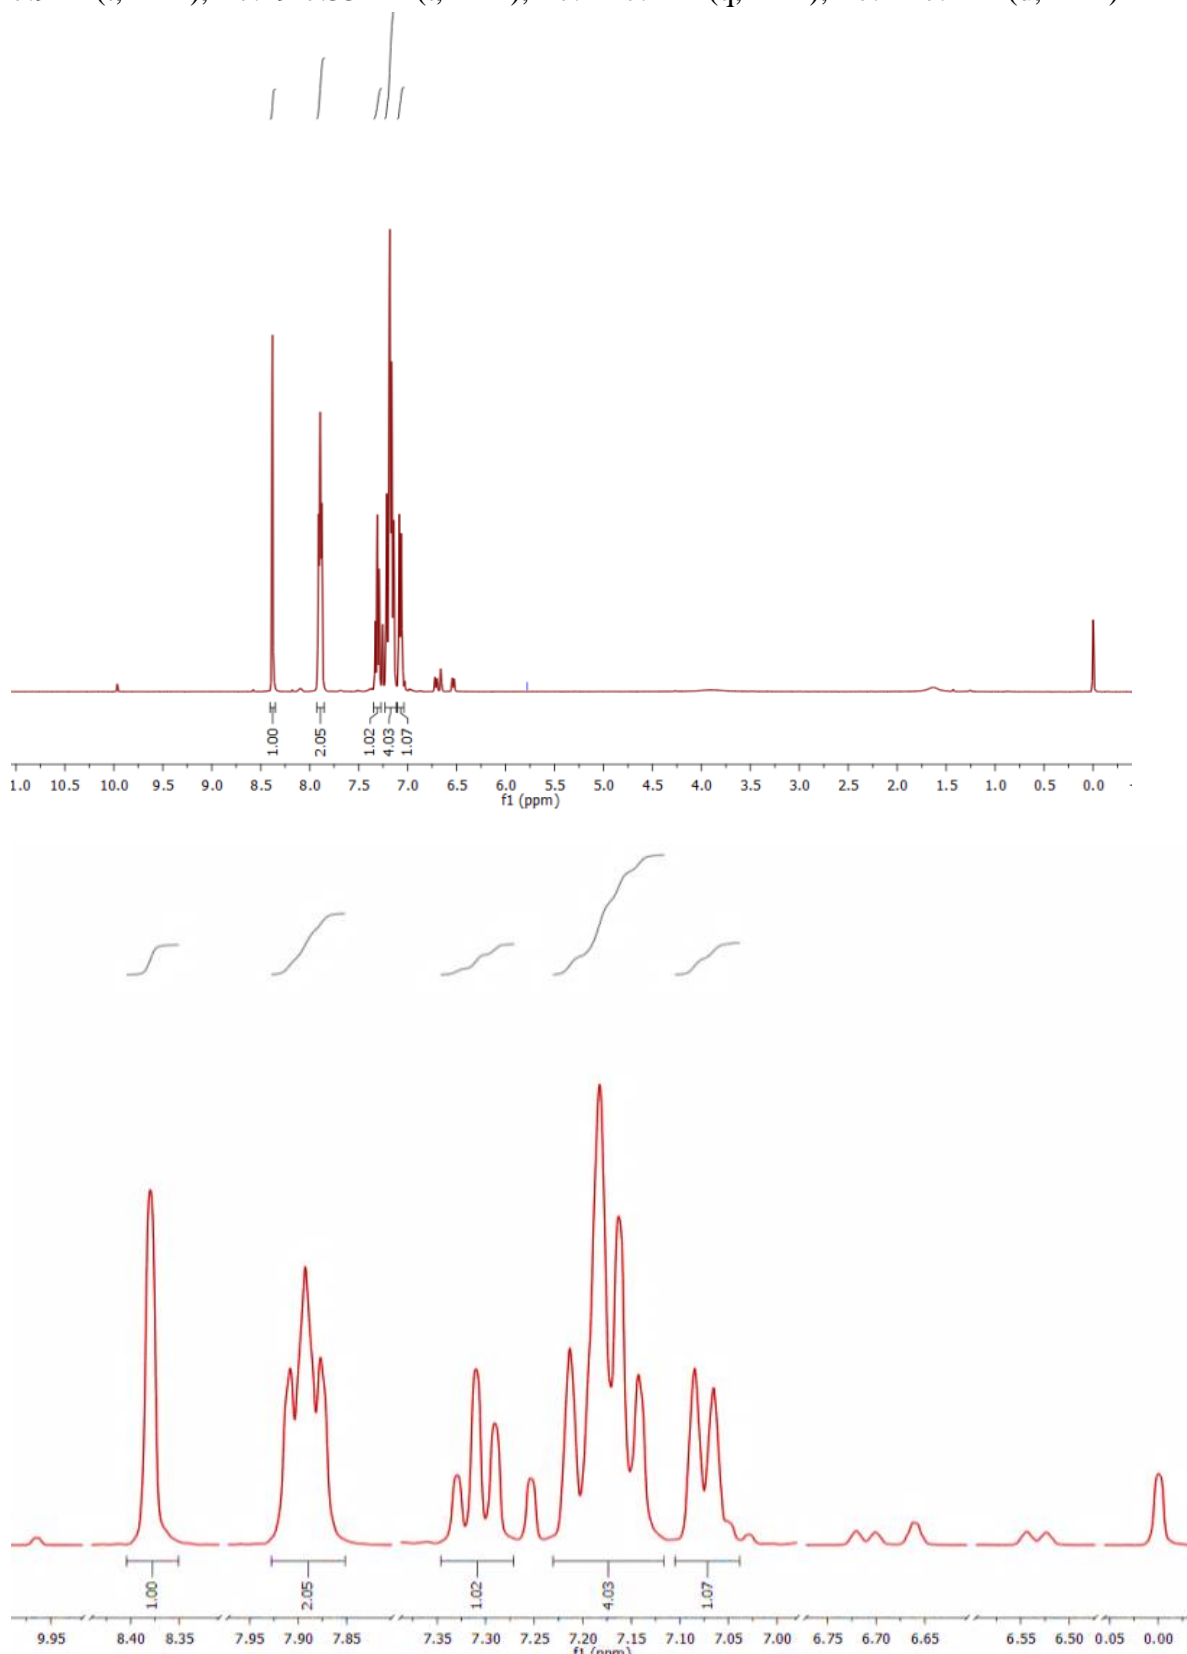

**FigureS1:30**      **Compound 45:** White solid.  $^1\text{H}$  NMR ( $\text{CDCl}_3$ )  $\delta$  8.34 (s, 1H), 7.92-7.96 (m, 2H), 7.42-7.44 (dd, 1H), 7.11-7.28 (m, 5H)

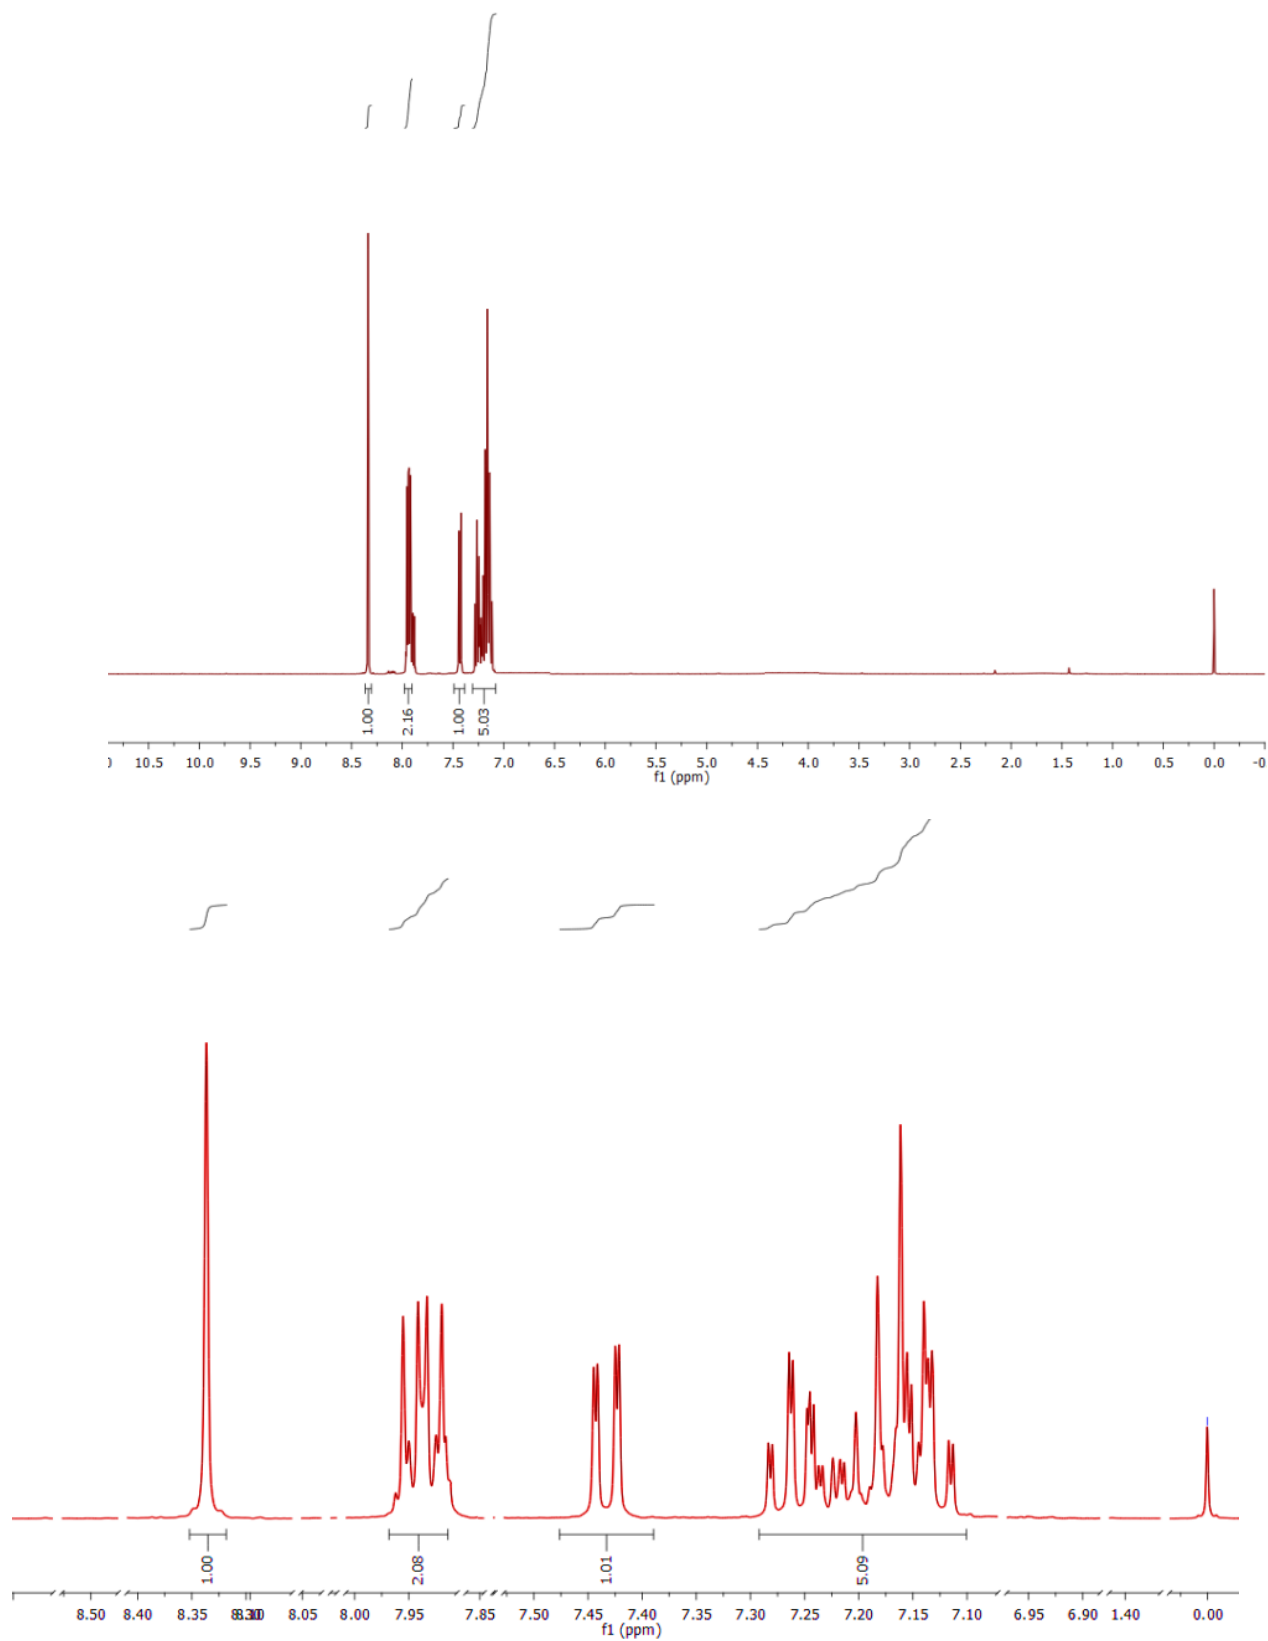

**FigureS1:31**      **Compound 46:** White solid.  $^1\text{H}$  NMR ( $\text{CDCl}_3$ )  $\delta$  8.41 (s,1H), 7.61-7.67 (m,2H), 7.42-7.47 (m, 1H), 7.34-7.38 (m, 2H), 7.14-7.22 (m, 3H)

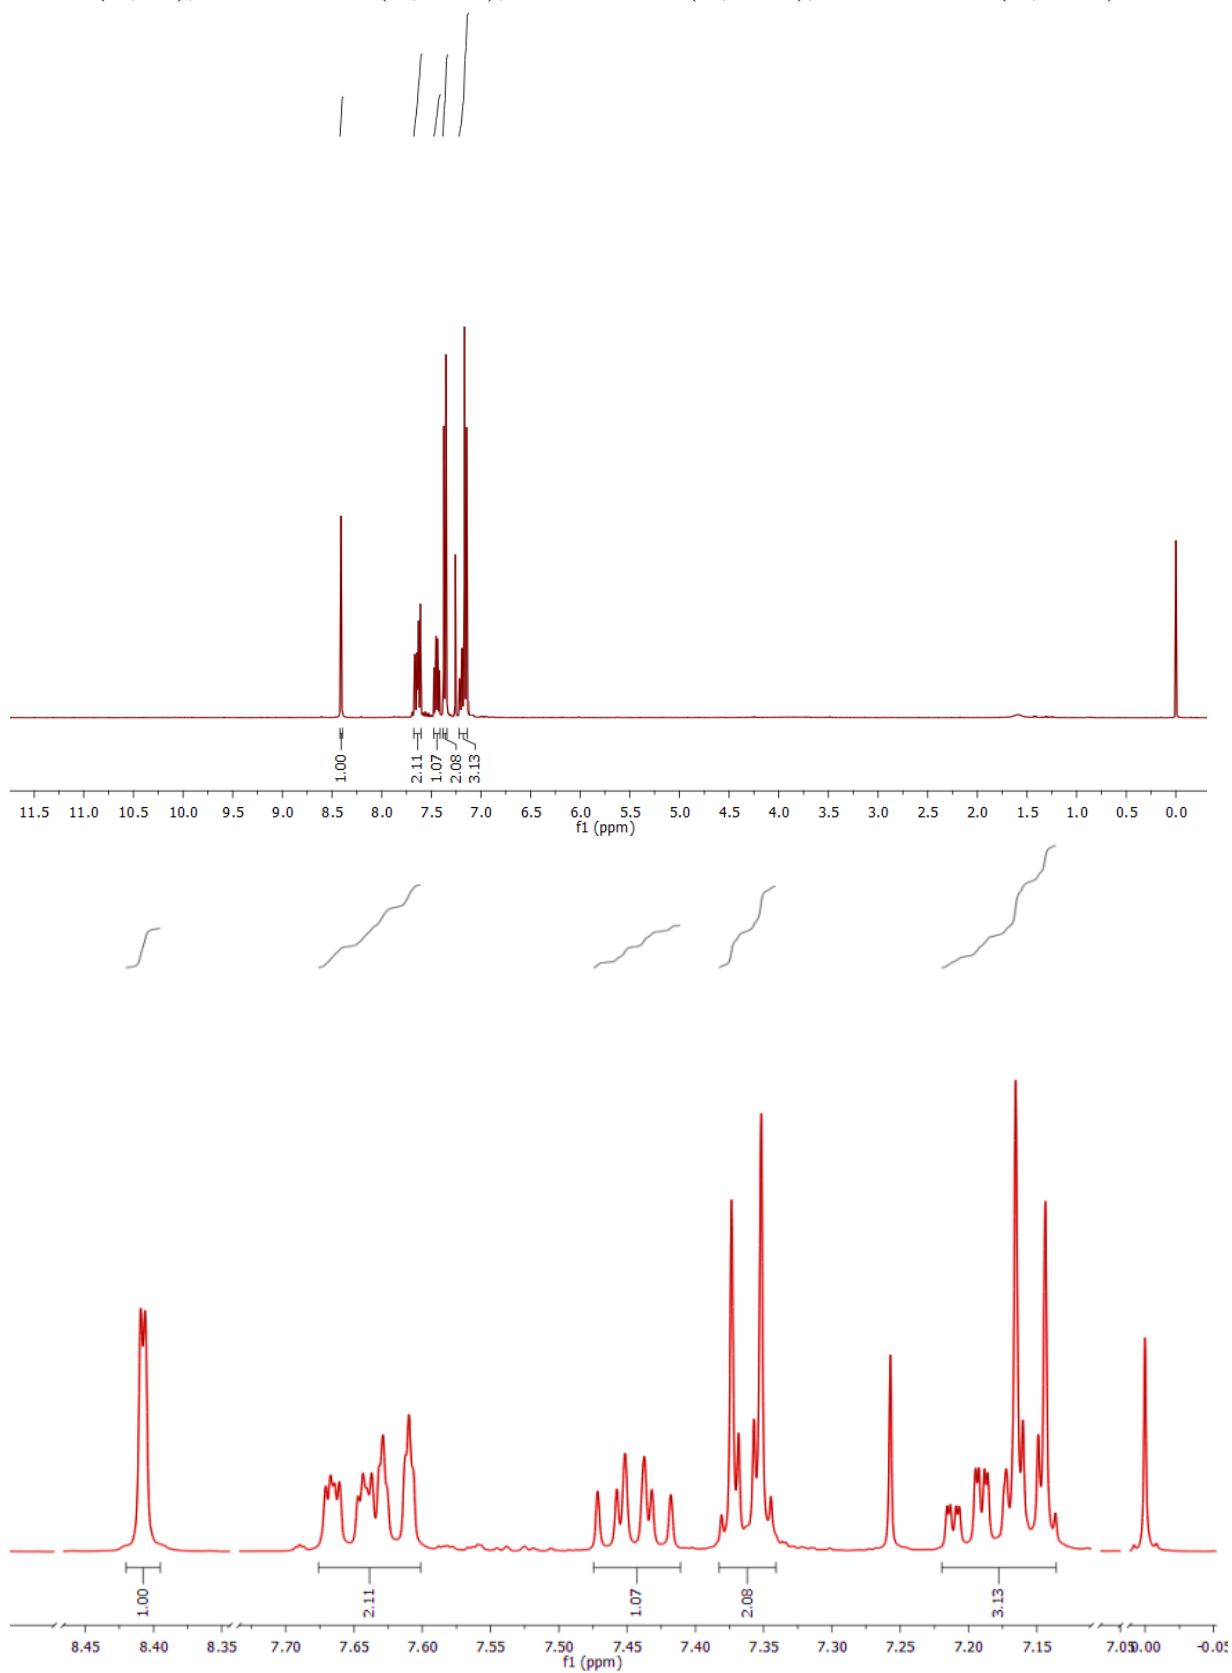

**FigureS1:32**      **Compound 47:** White solid.  $^1\text{H}$  NMR ( $\text{CDCl}_3$ )  $\delta$  8.40 (s, 1H), 7.61-7.68 (m, 2H), 7.50-7.58 (m, 1H), 7.42-7.48 (m, 1H), 7.30-7.34 (m, 1H), 7.20-7.24 (m, 2H), 7.07-7.11 (m, 1H).

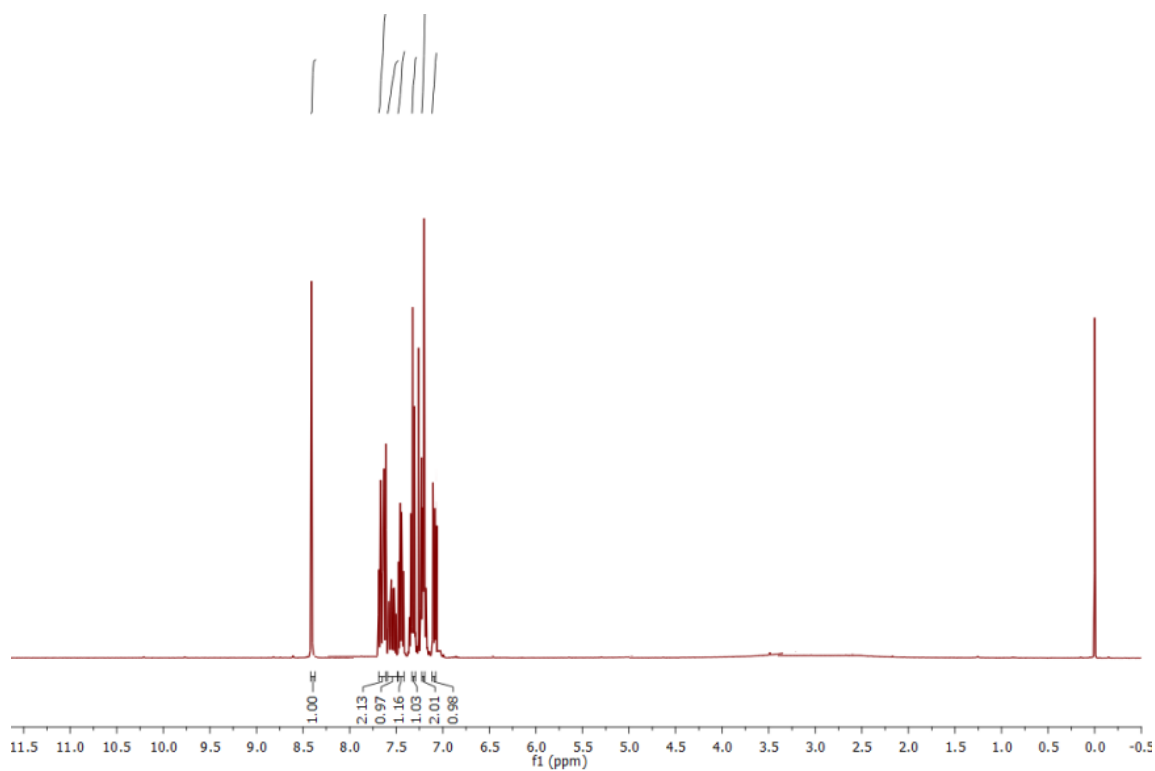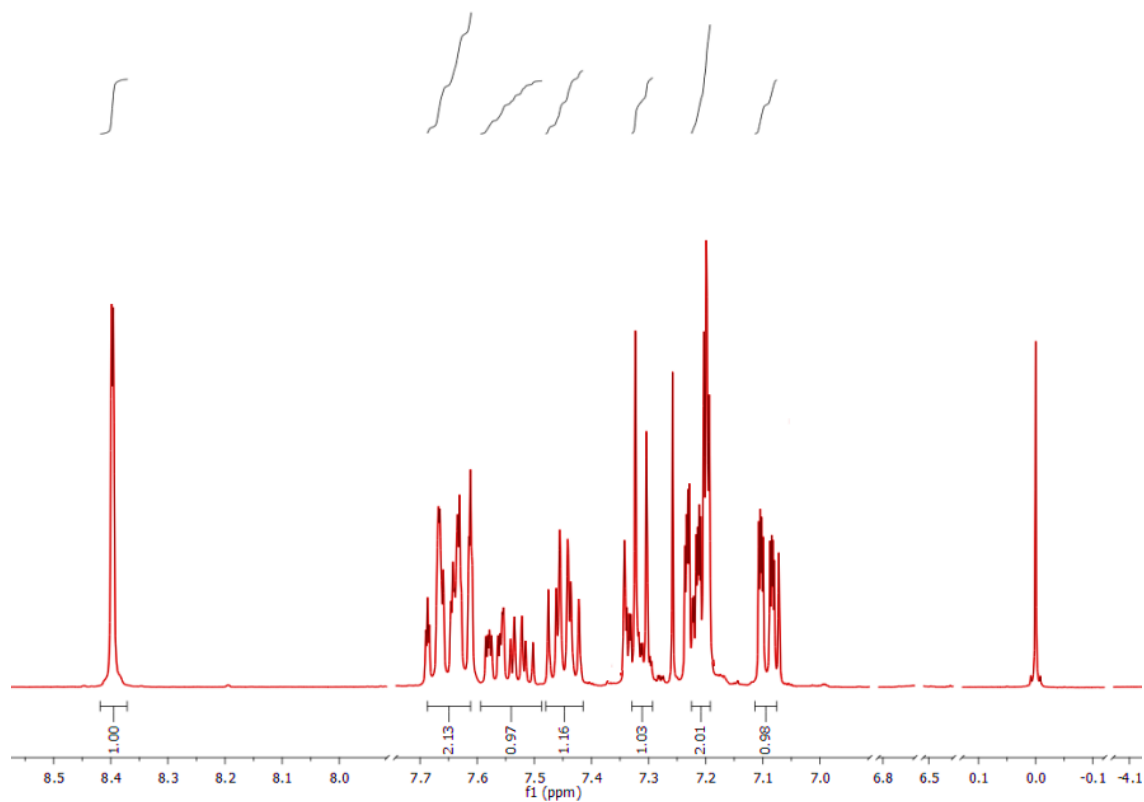



**FigureS1:33**      **Compound 48:** White solid.  $^1\text{H}$  NMR ( $\text{CDCl}_3$ )  $\delta$  8.49 (s, 1H), 7.66-7.77 (m, 3H), 7.45-7.51 (m, 1H), 7.33-7.38 (m, 1H), 7.21-7.26 (t, 1H), 7.02-7.05 (d, 1H).

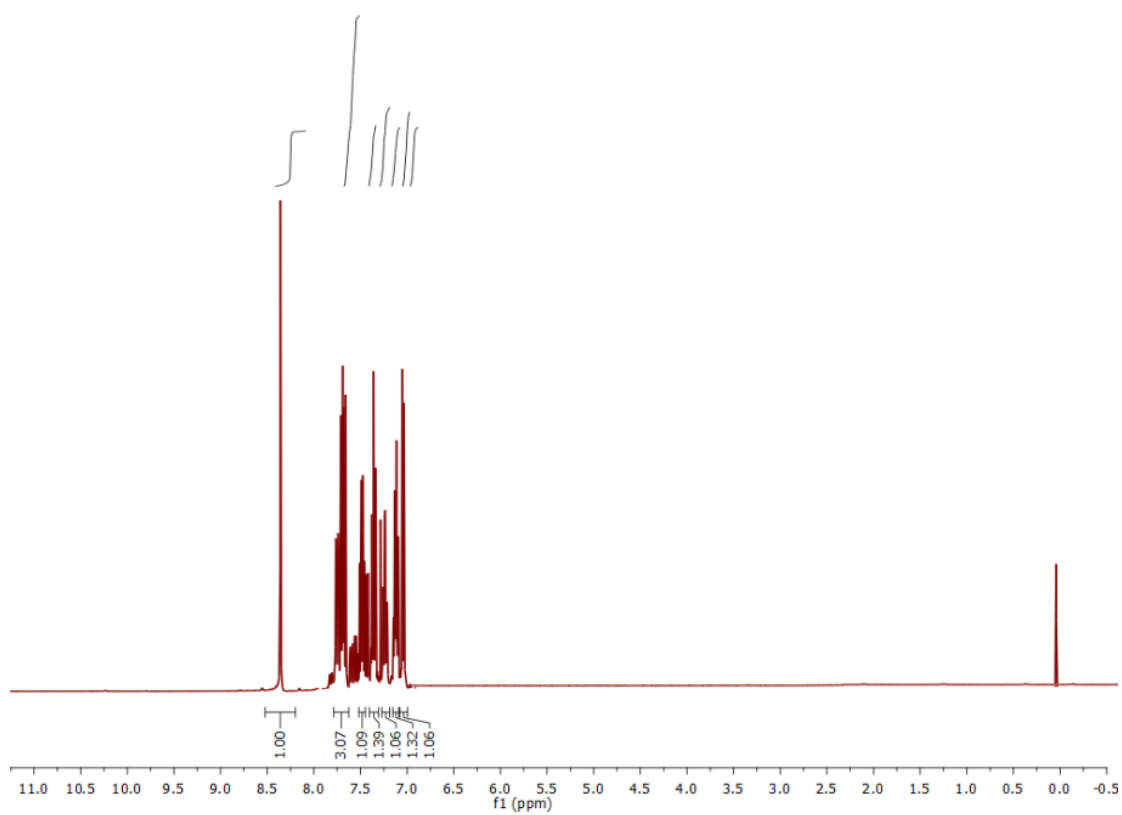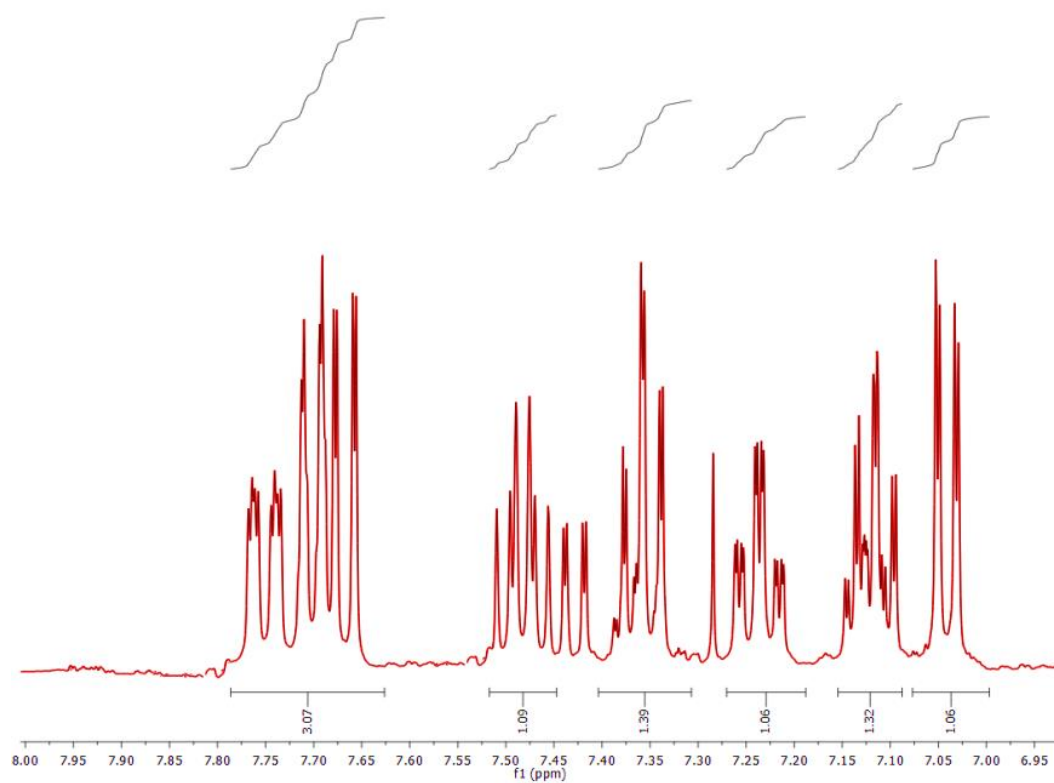

**FigureS1:34**      **Compound 49:** White solid.  $^1\text{H}$  NMR ( $\text{CDCl}_3$ )  $\delta$  8.75 (s, 1H), 8.14-8.18 (m, 1H), 7.44-7.50 (m, 1H), 7.34-7.38 (dt, 2H), 7.23-7.27 (t, 1H), 7.11-7.19 (m, 3H),

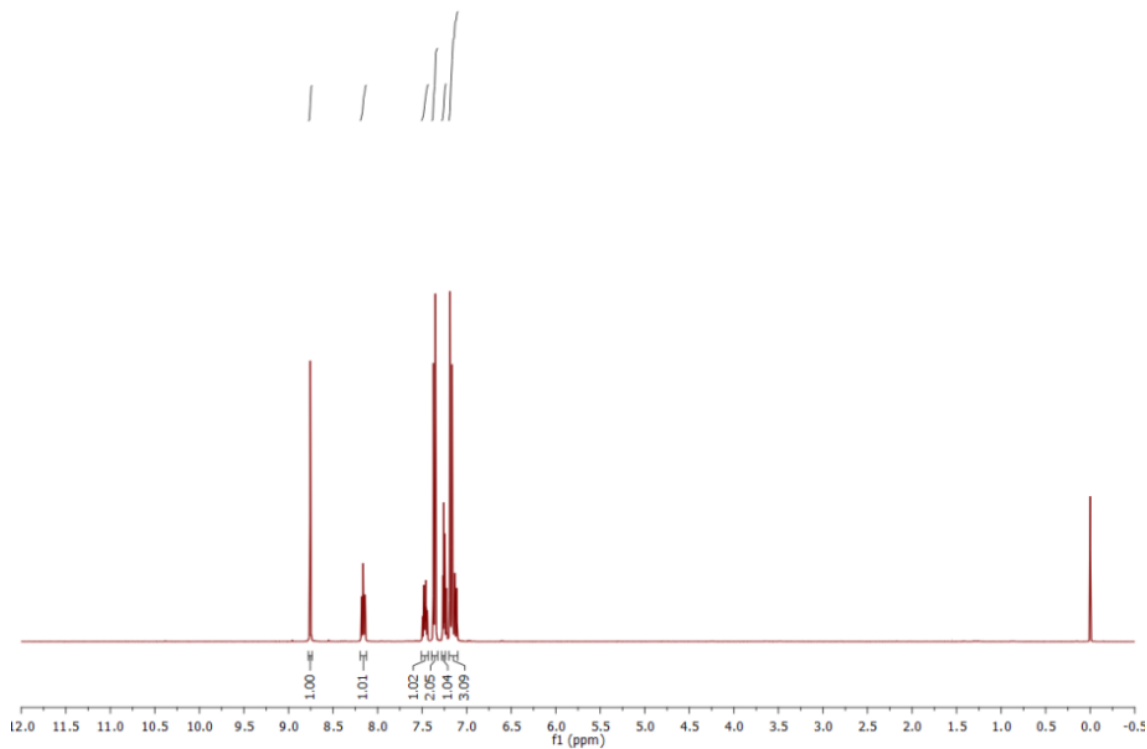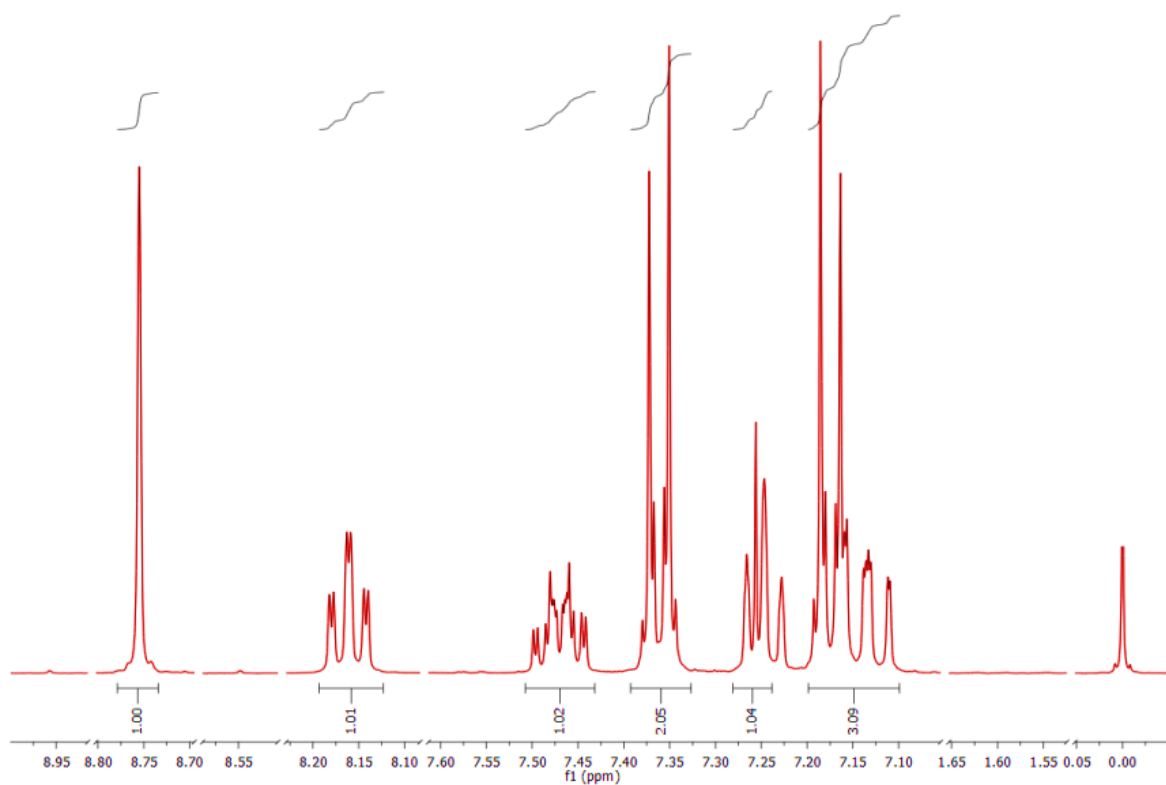

**FigureS1:35**      **Compound 50:** White solid.  $^1\text{H}$  NMR ( $\text{CDCl}_3$ )  $\delta$  8.75 (s, 1H), 8.14-8.18 (td, 1H), 7.46-7.51 (m, 1H), 7.31-7.35 (m, 1H), 7.22-7.27 (m, 3H), 7.10-7.17 (m, 2H).

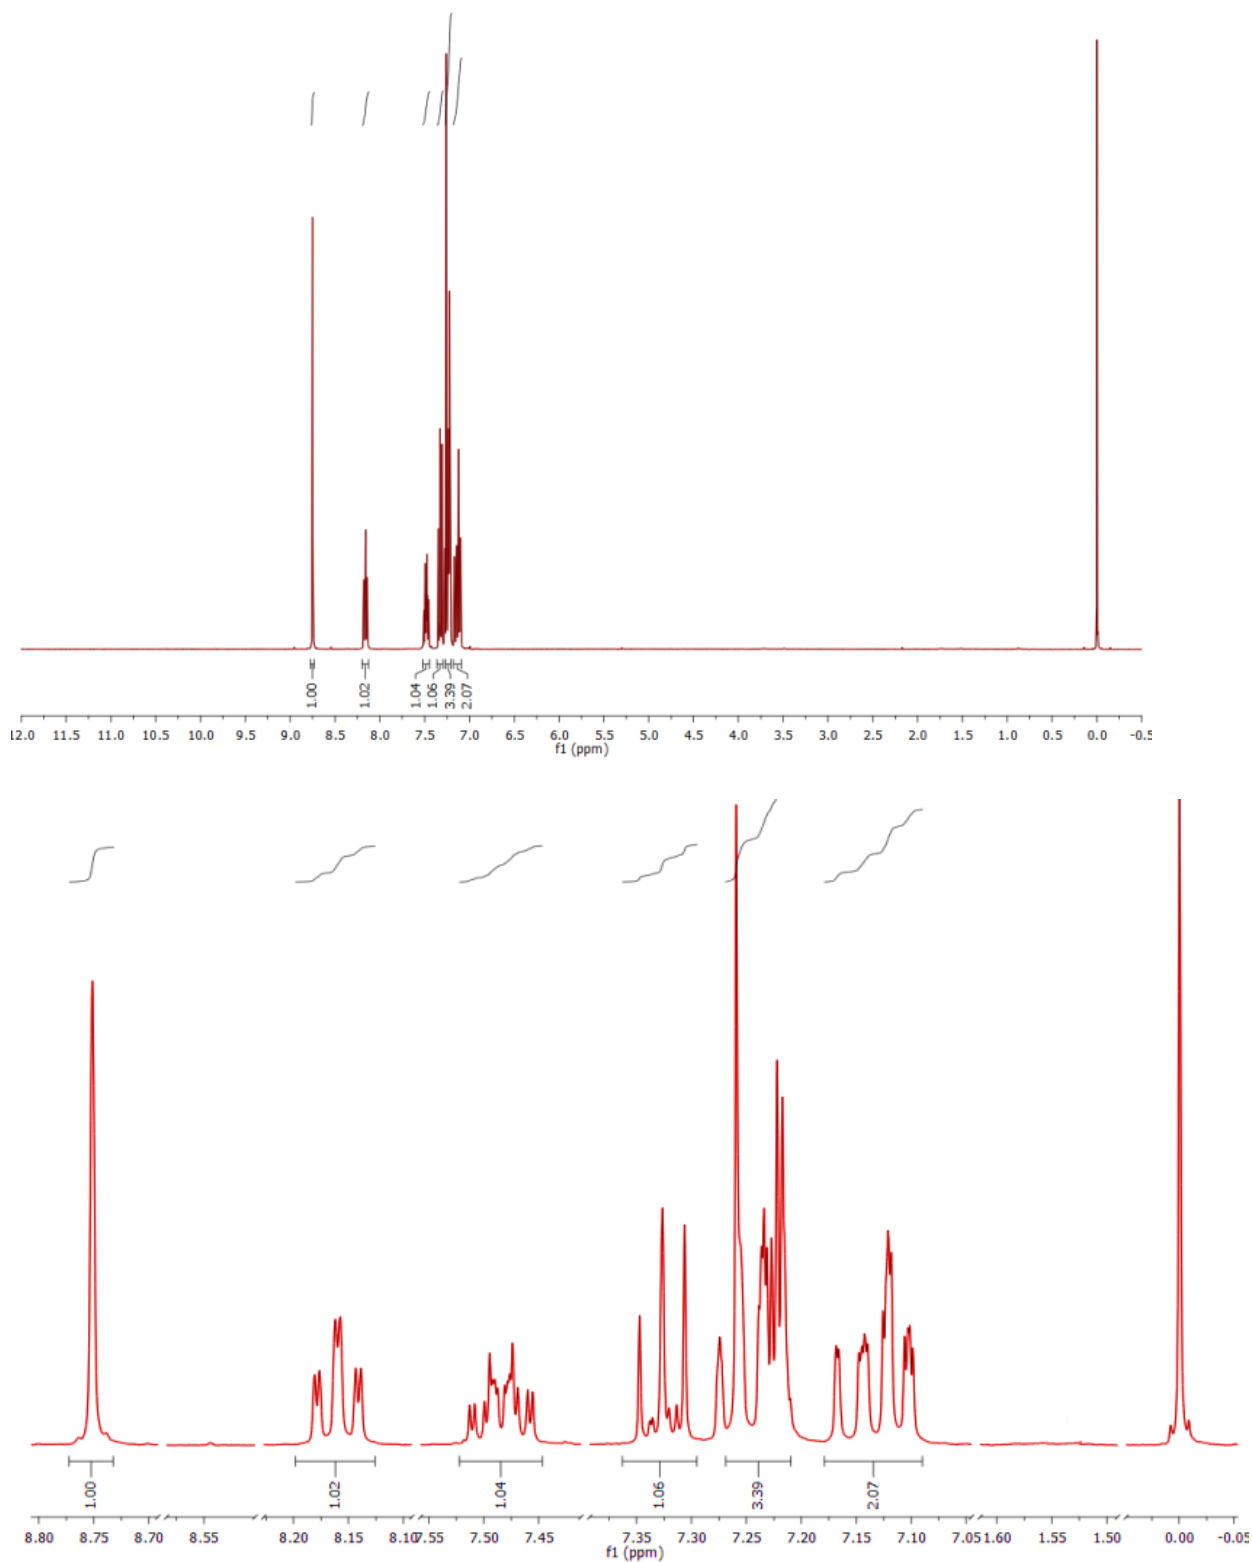

**FigureS1:36**      **Compound 51:** White solid.  $^1\text{H}$  NMR ( $\text{CDCl}_3$ )  $\delta$  8.72 (s, 1H), 8.23-8.28 (td, 1H), 7.43-7.52 (m, 2H), 7.25-7.30 (m, 2H), 7.12-7.18 (m, 2H), 7.04-7.06 (dd, 1H).

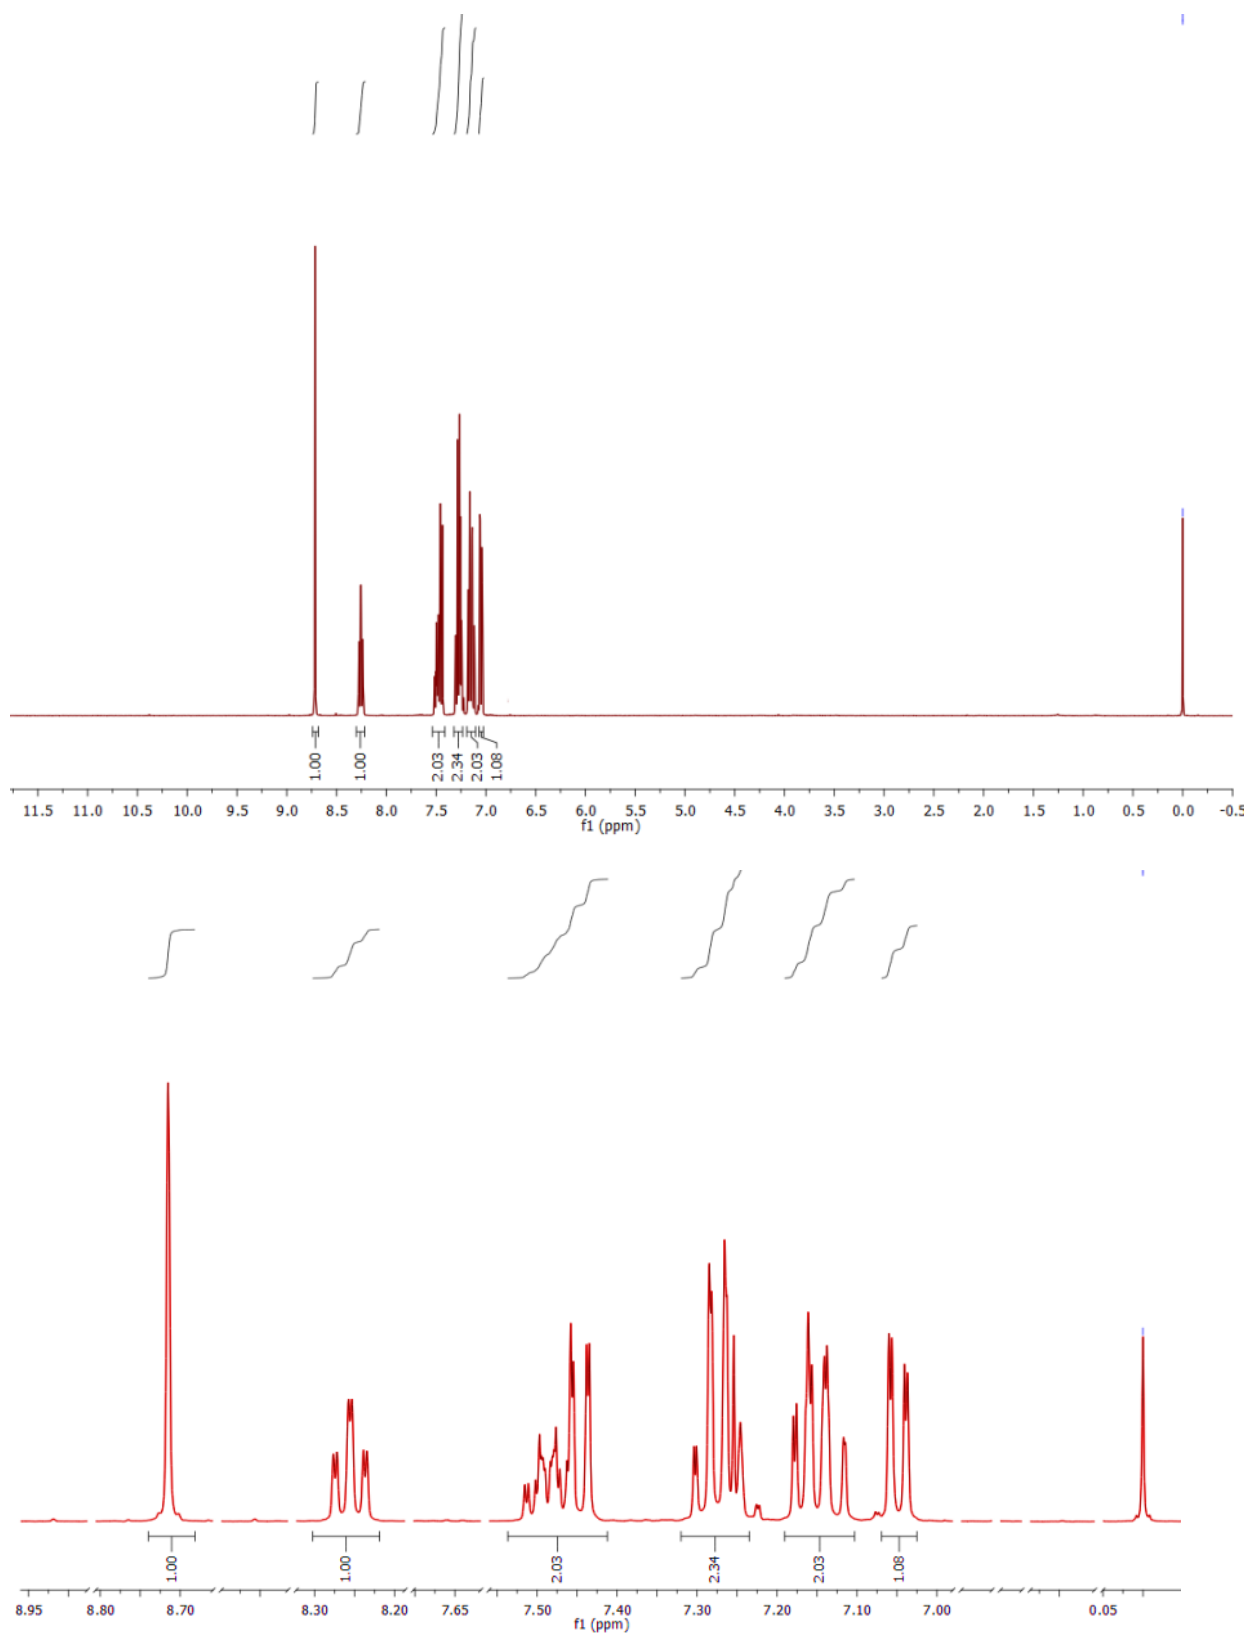

**Figure S2: IR-S1pectra of the compoundS1:** All IR S1pectra were recorded on

**Figure S2:1      Compound 16**

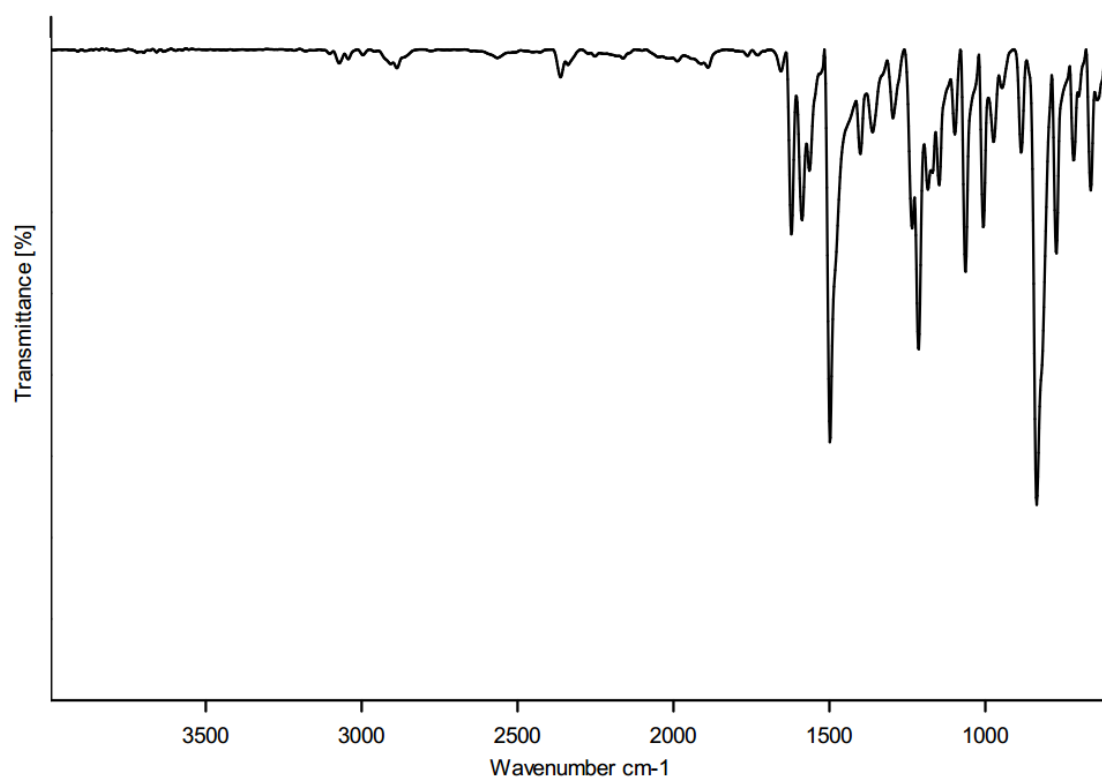

**Figure S2:2      Compound 17**

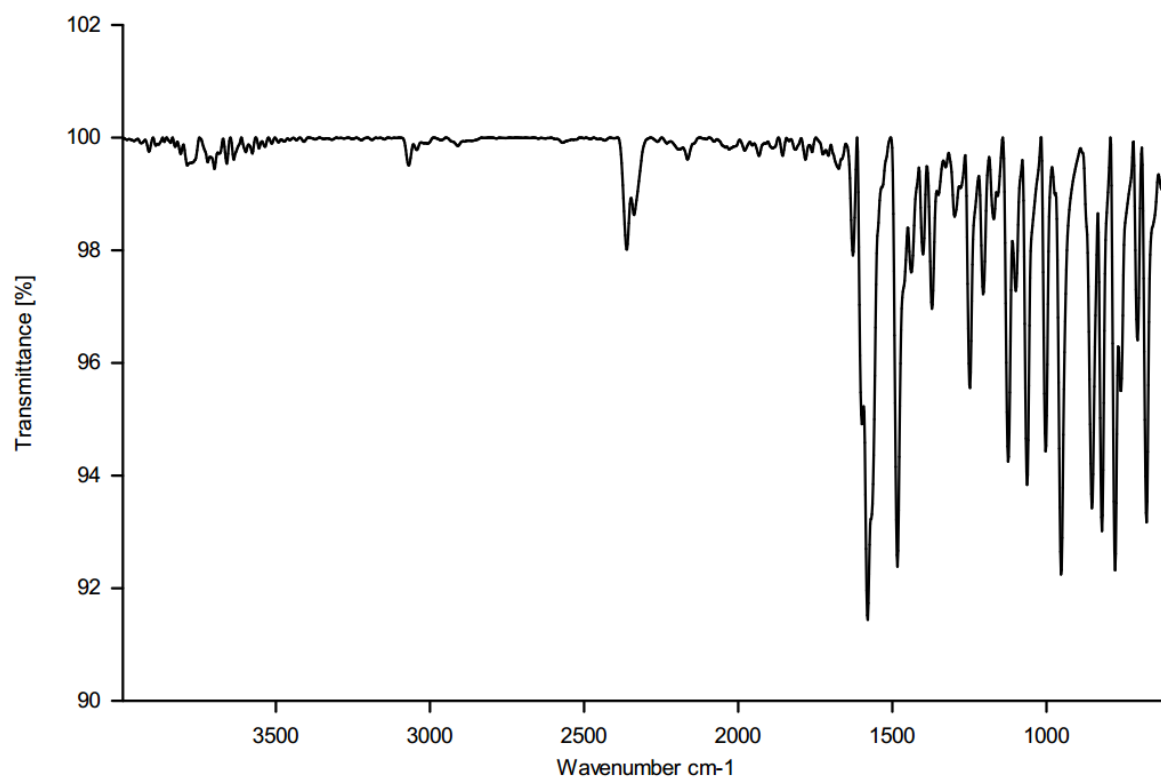

**Figure S2:3      Compound 18**

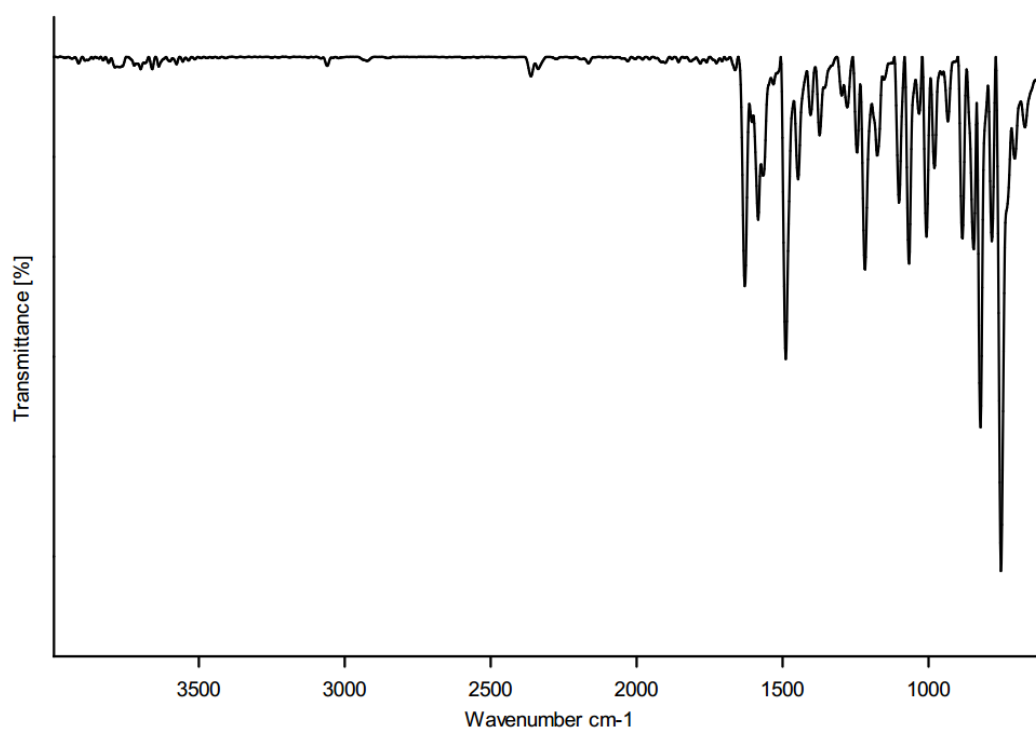

**Figure S2:4      Compound 19**

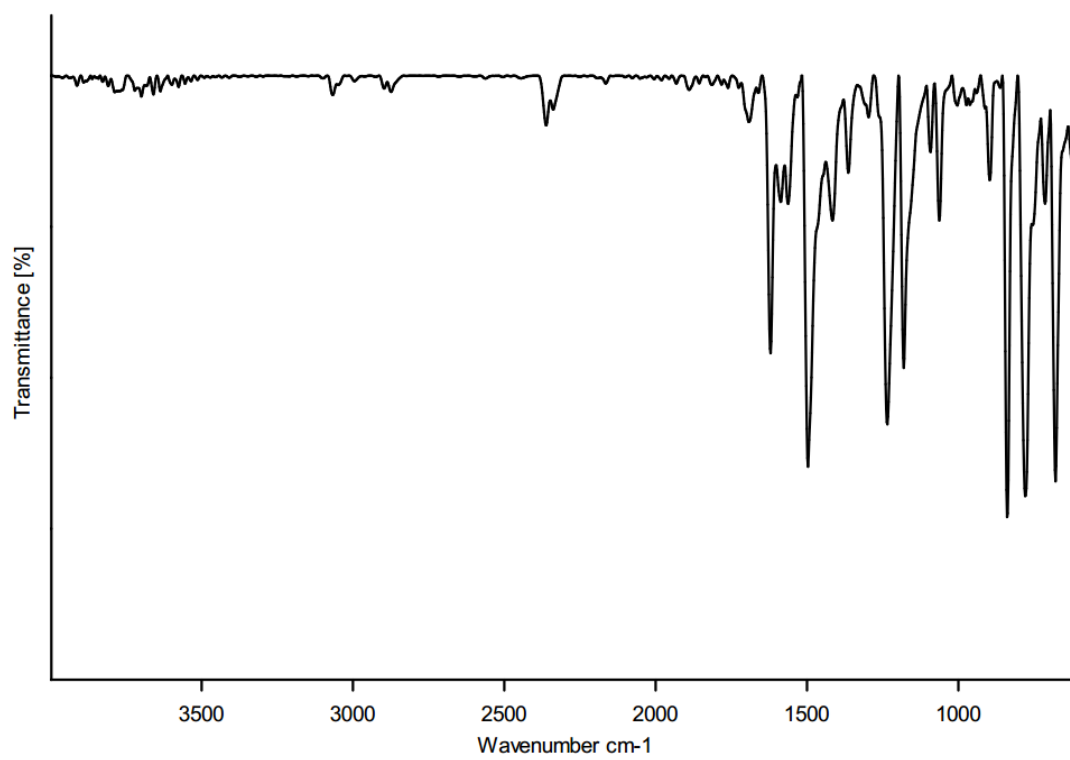

**Figure S2:5      Compound 20**

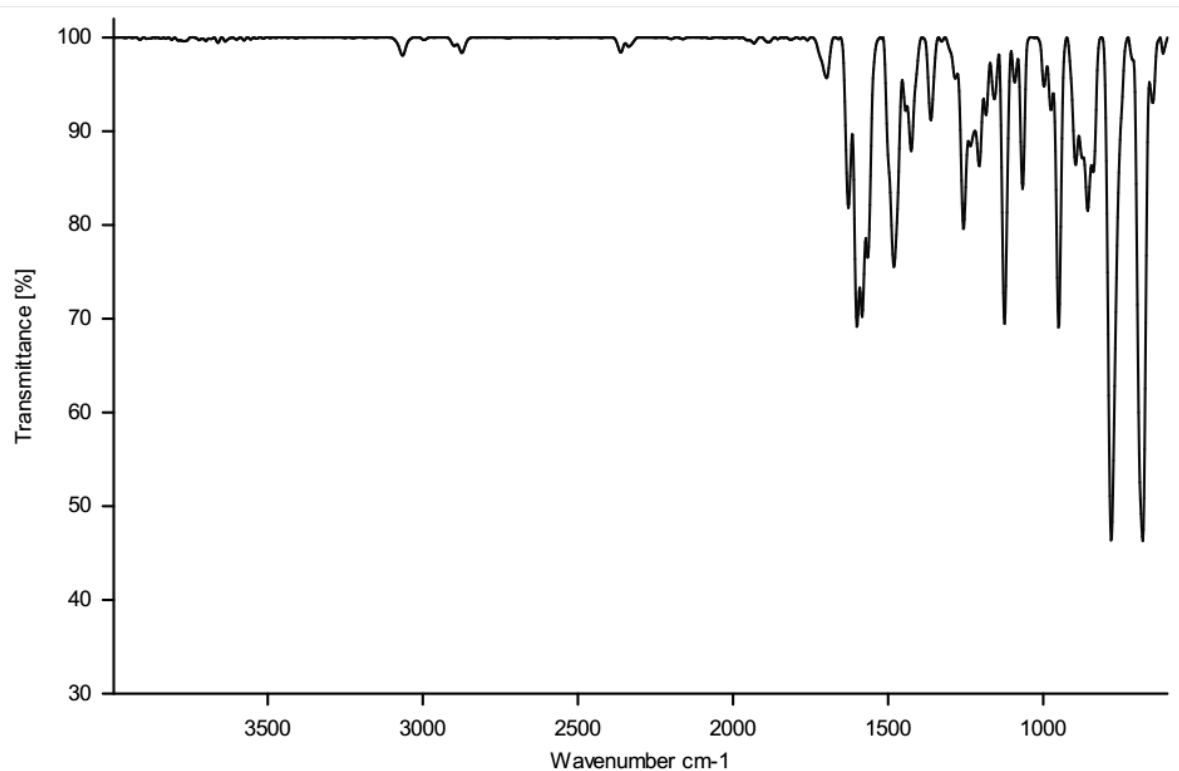

**Figure S2:6      Compound 21**

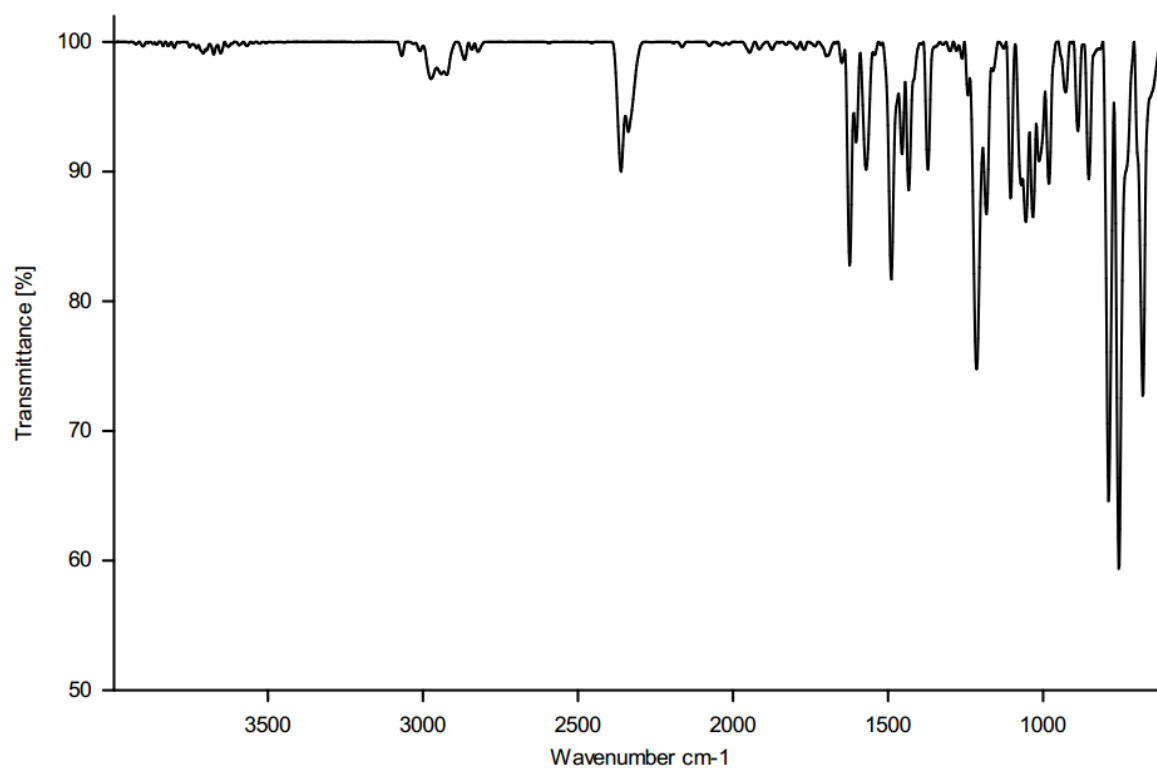

**Figure S2:7      Compound 22**

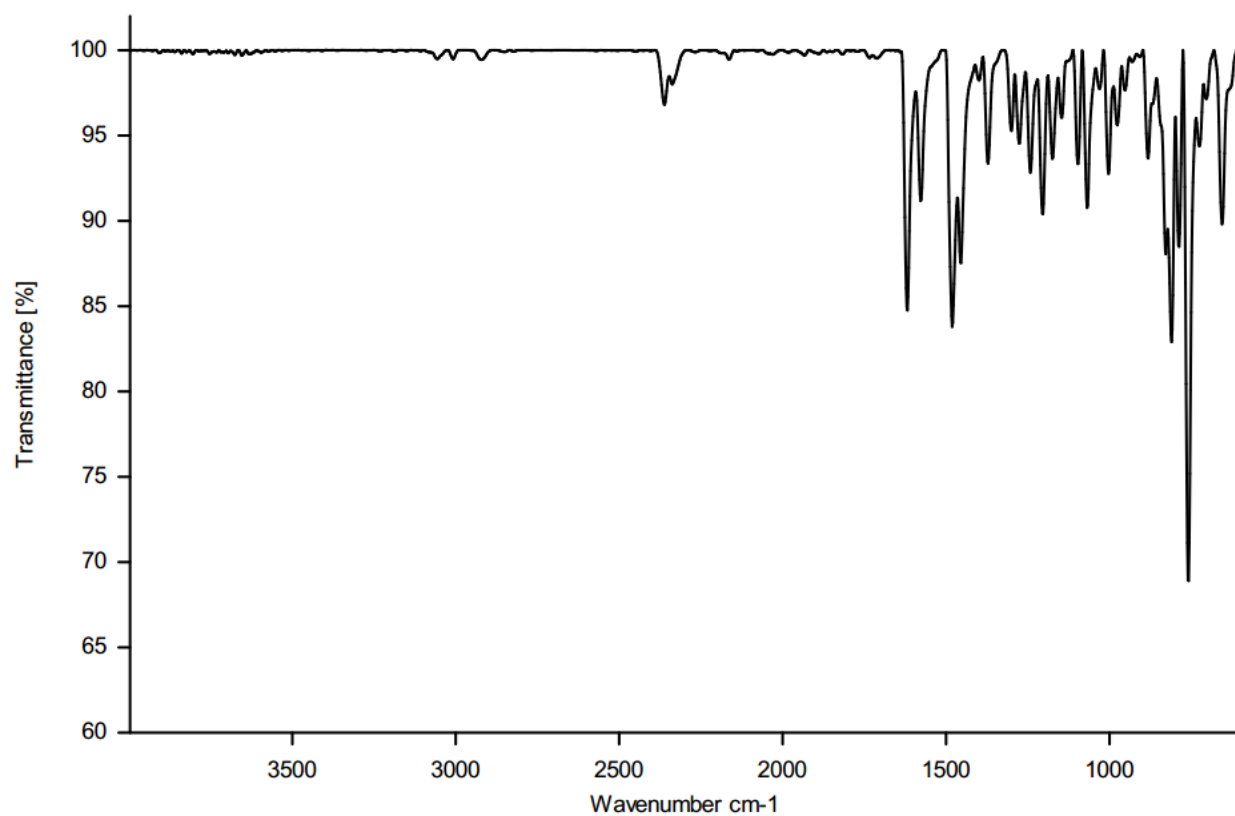

**Figure S2:8      Compound 23**

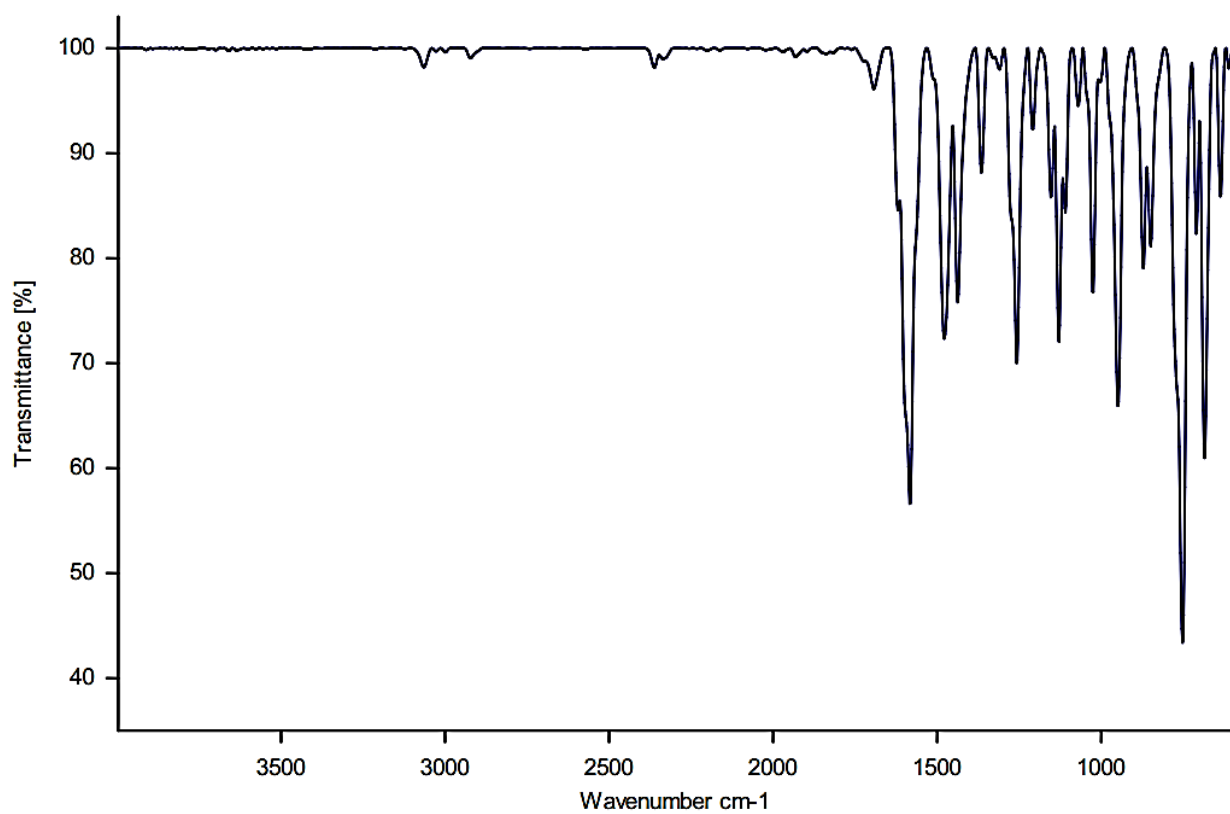



**Figure S2:9      Compound 24**

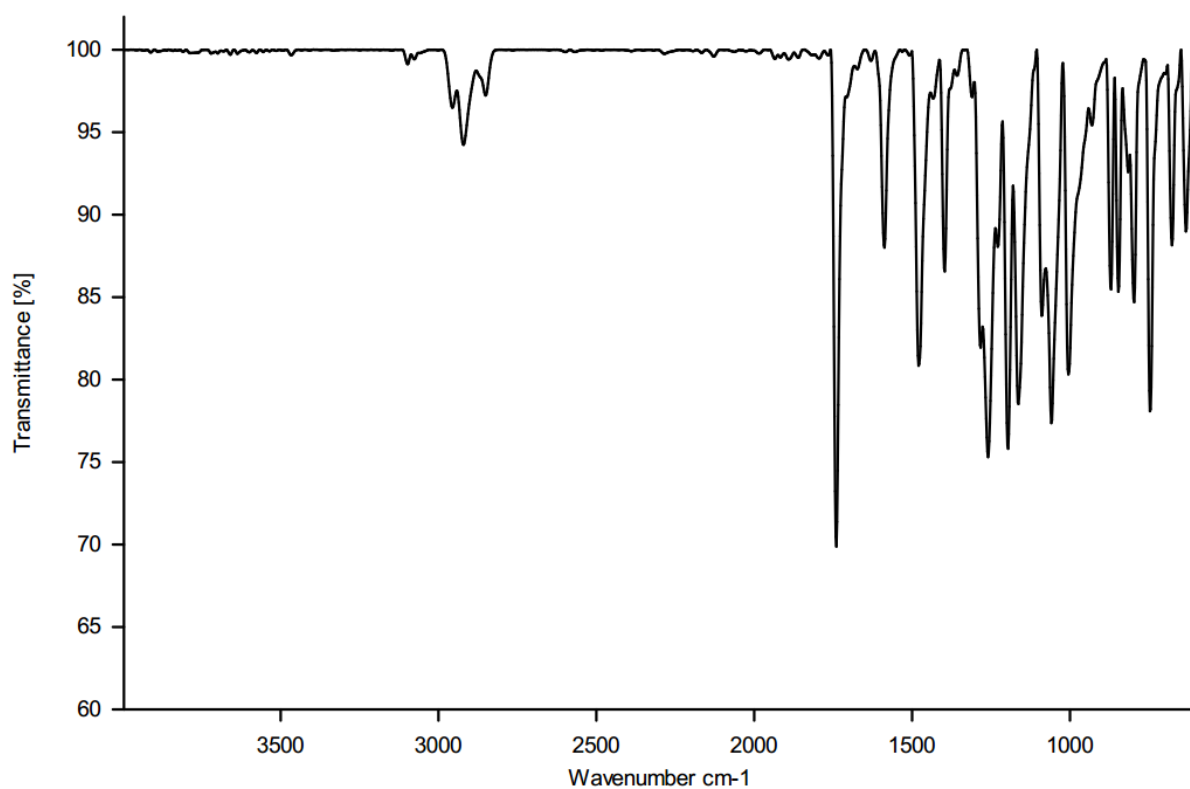

**Figure S2:10      Compound 25**

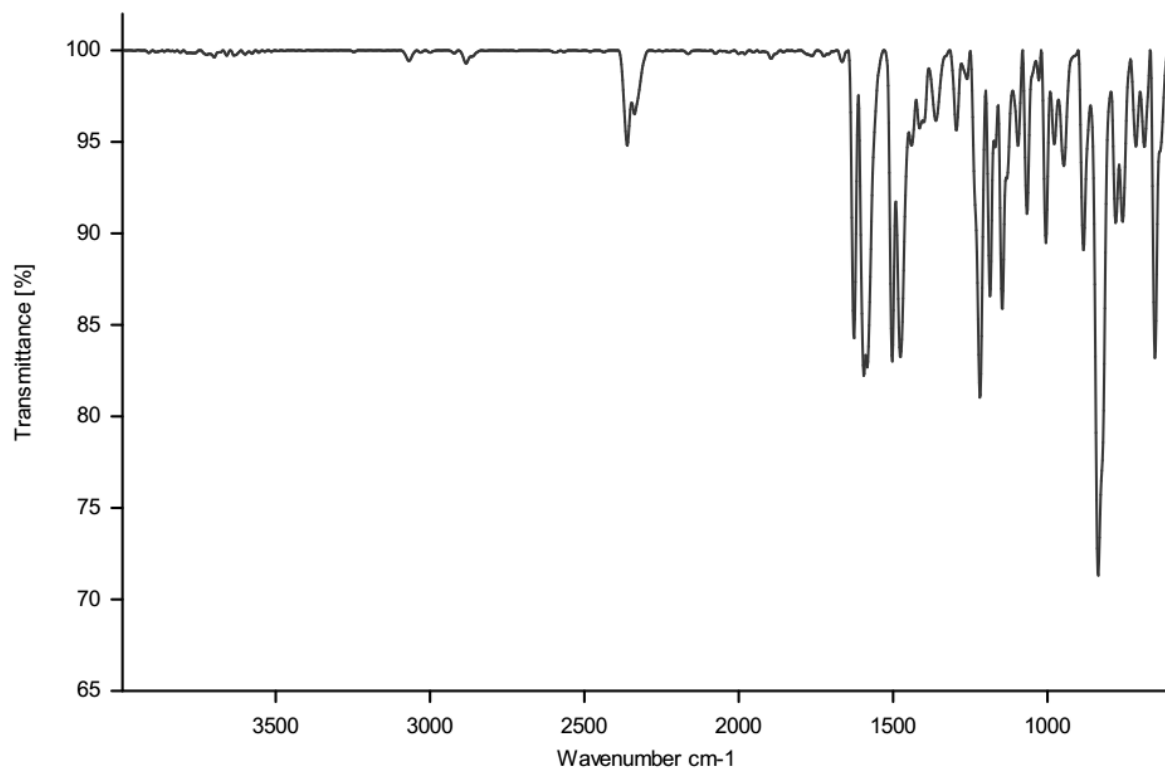

**Figure S2:11     Compound 26**

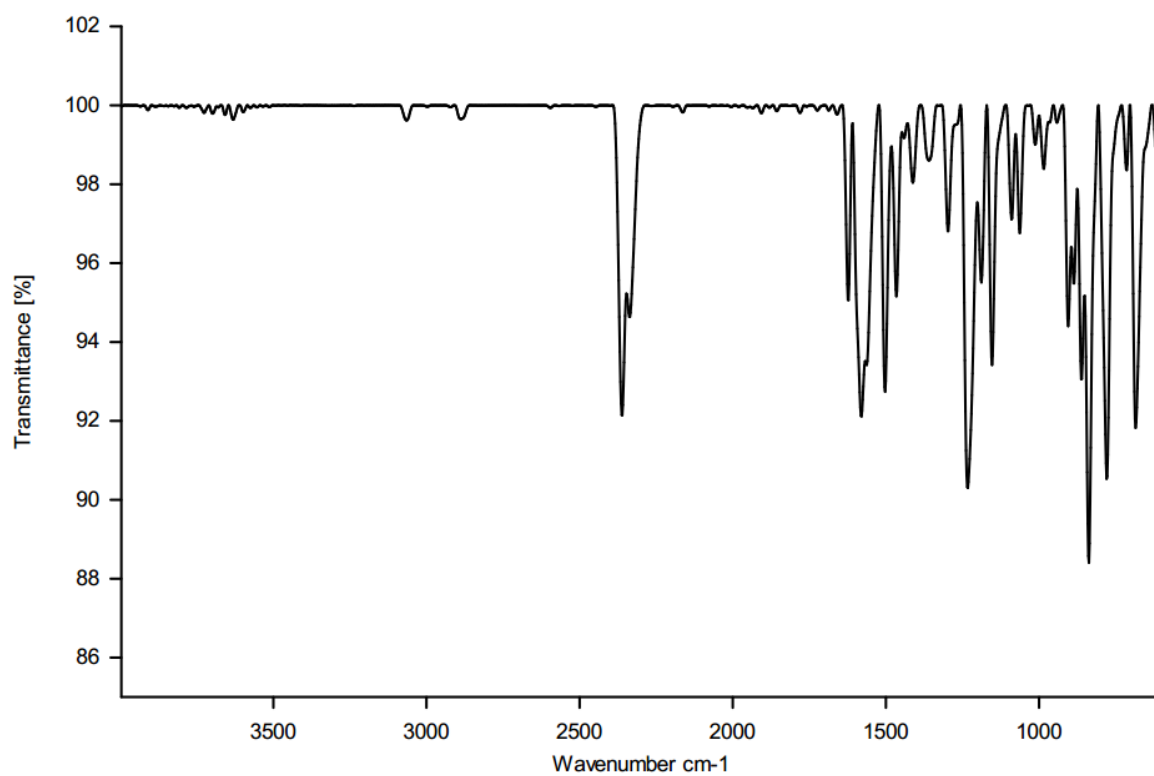

**Figure S2:12     Compound 27**

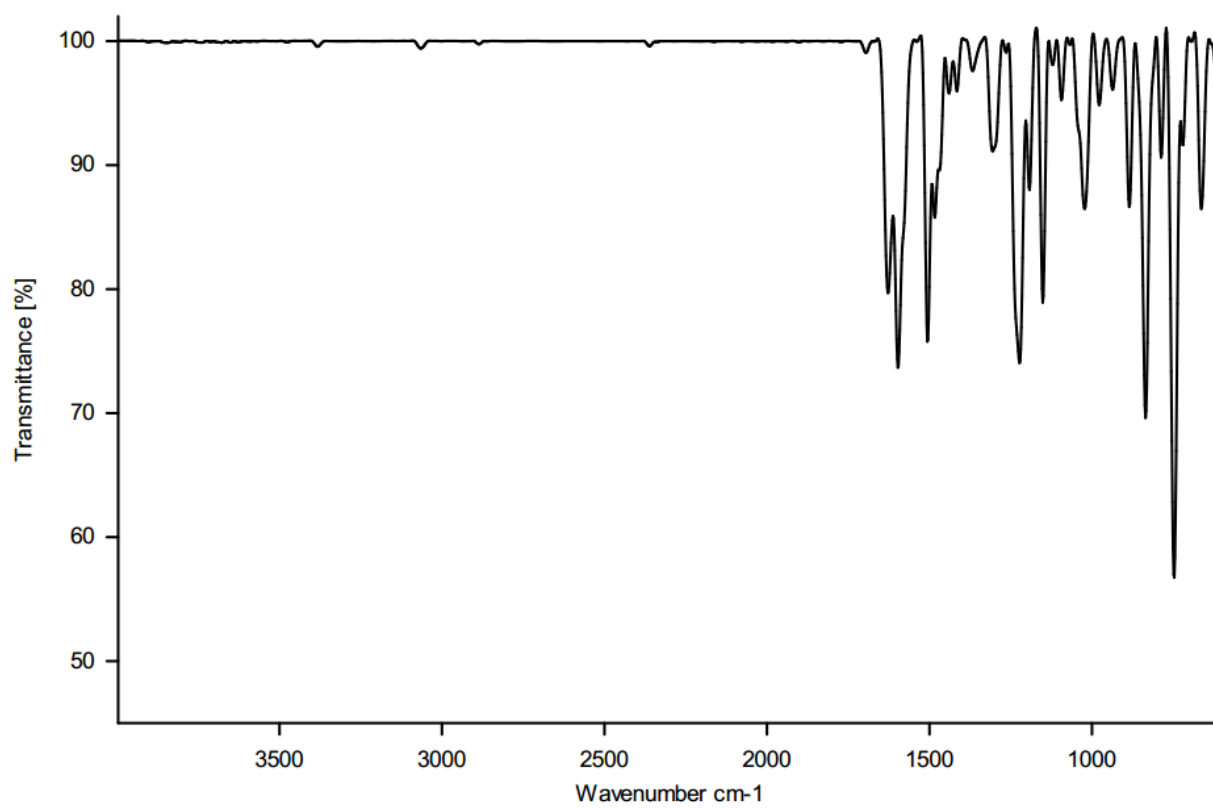

**Figure S2:13     Compound 28**

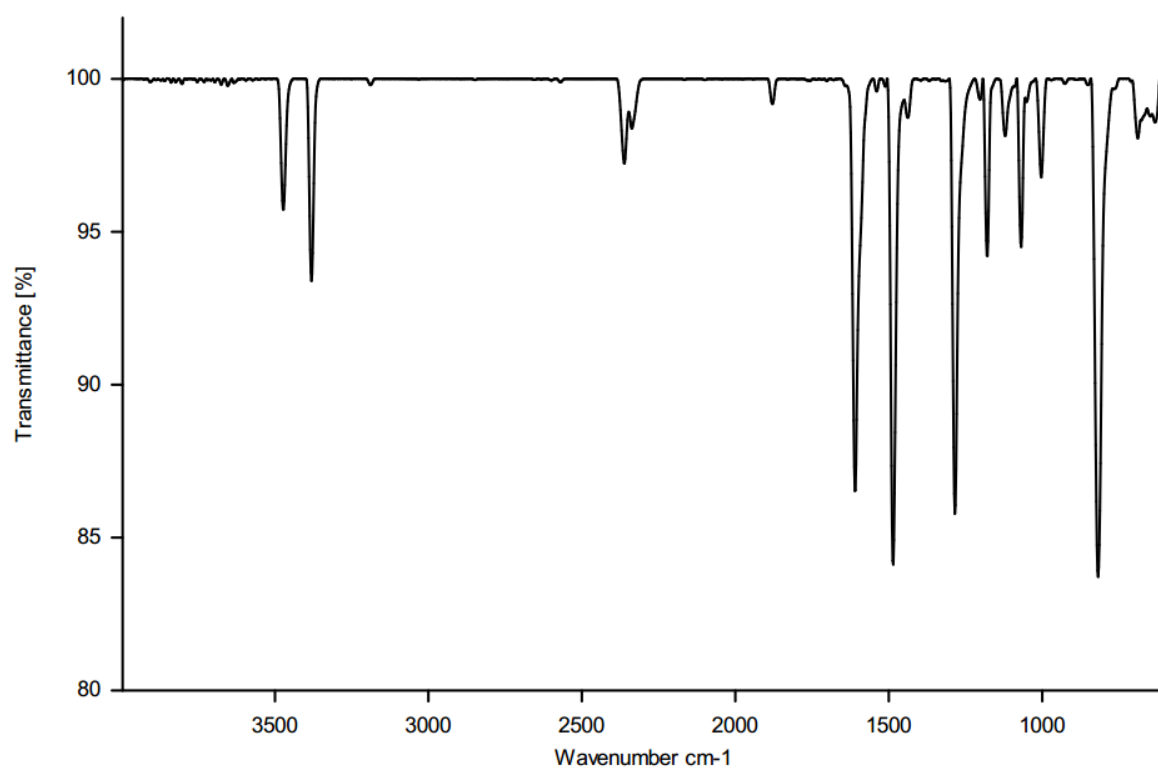

**Figure S2:14     Compound 29**

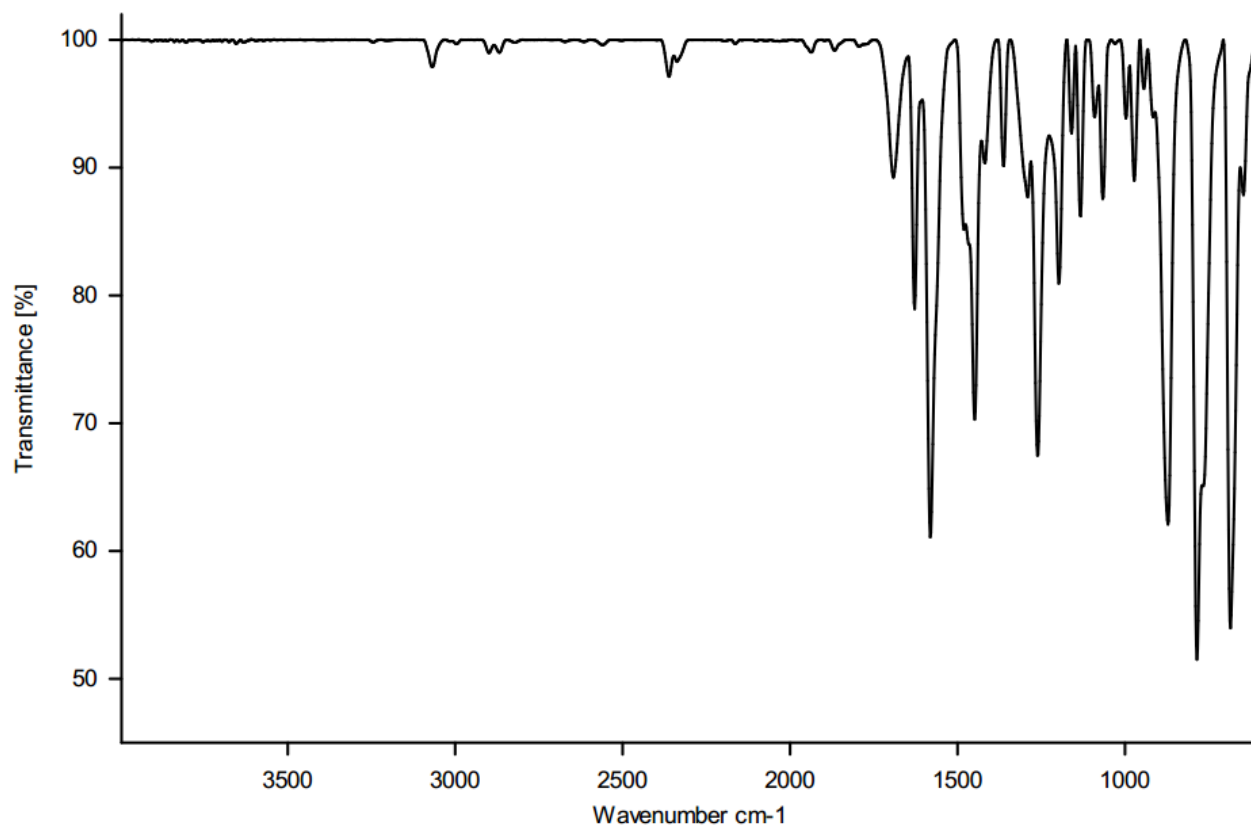

**Figure S2:15     Compound 30**

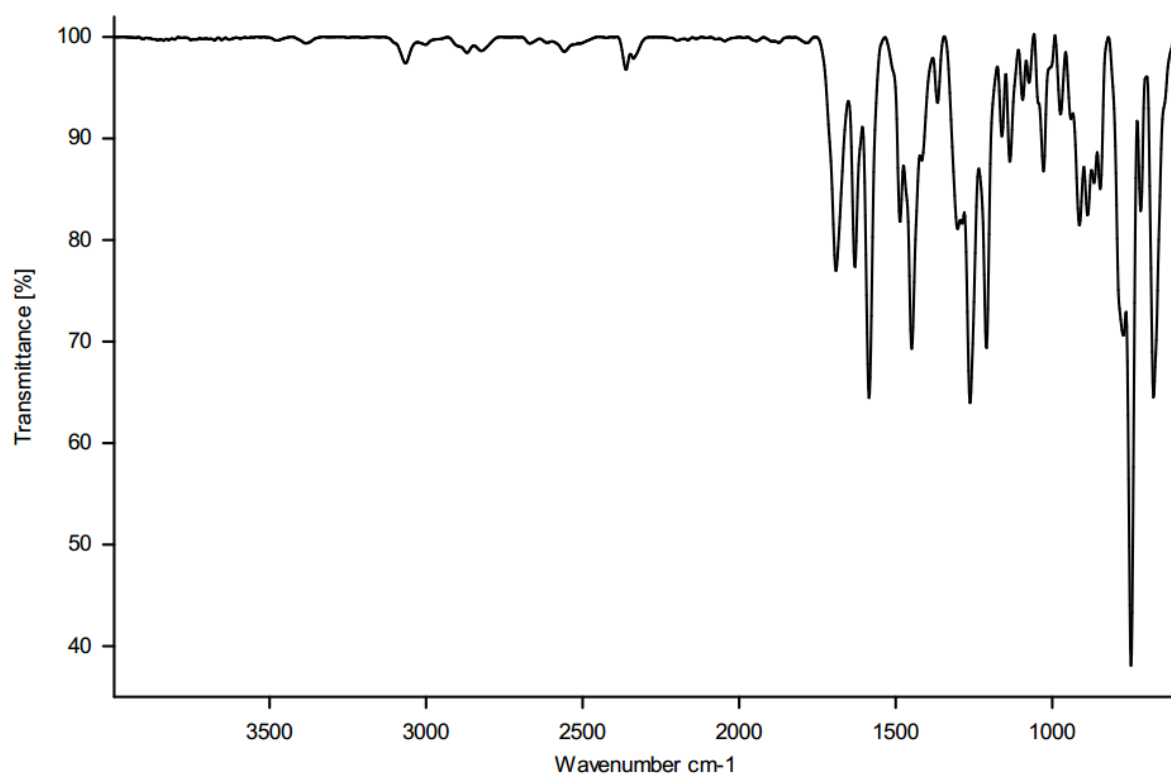

**Figure S2:16     Compound 31**

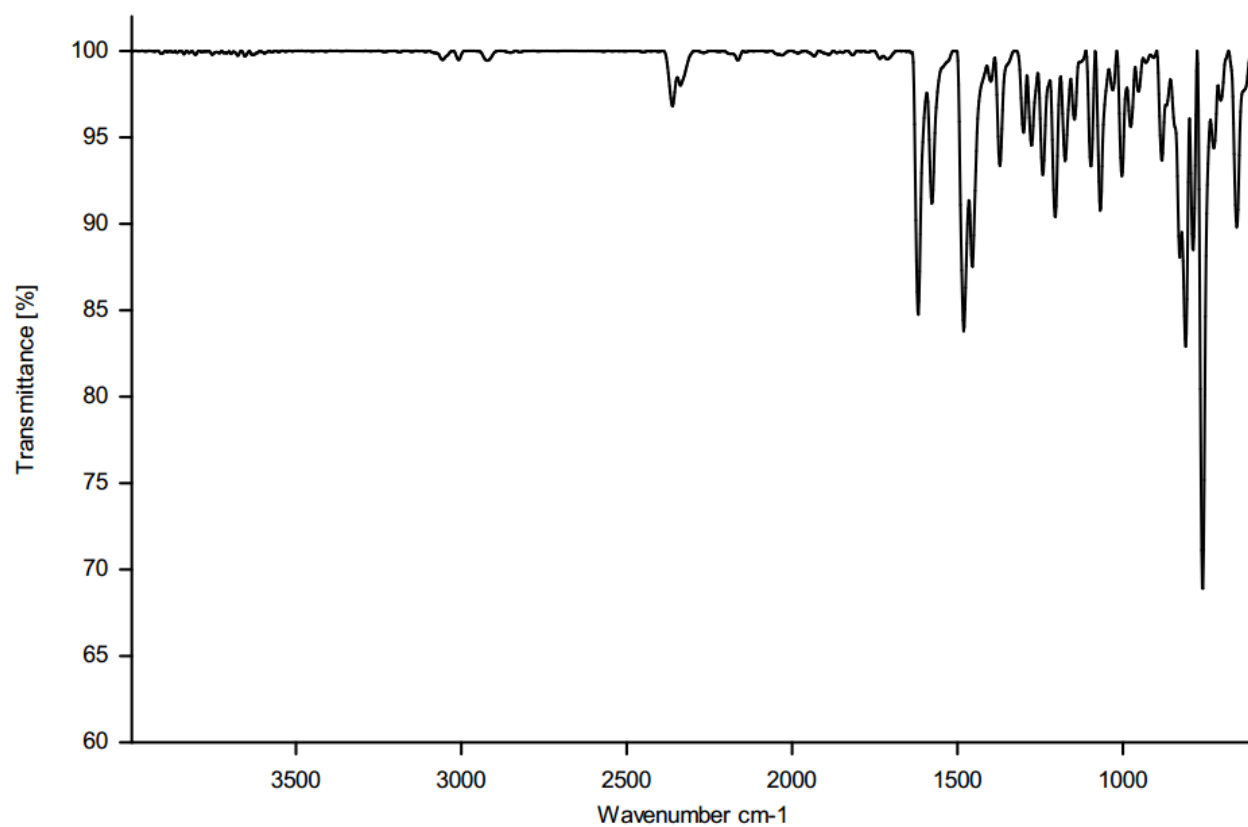

**Figure S2:17     Compound 32**

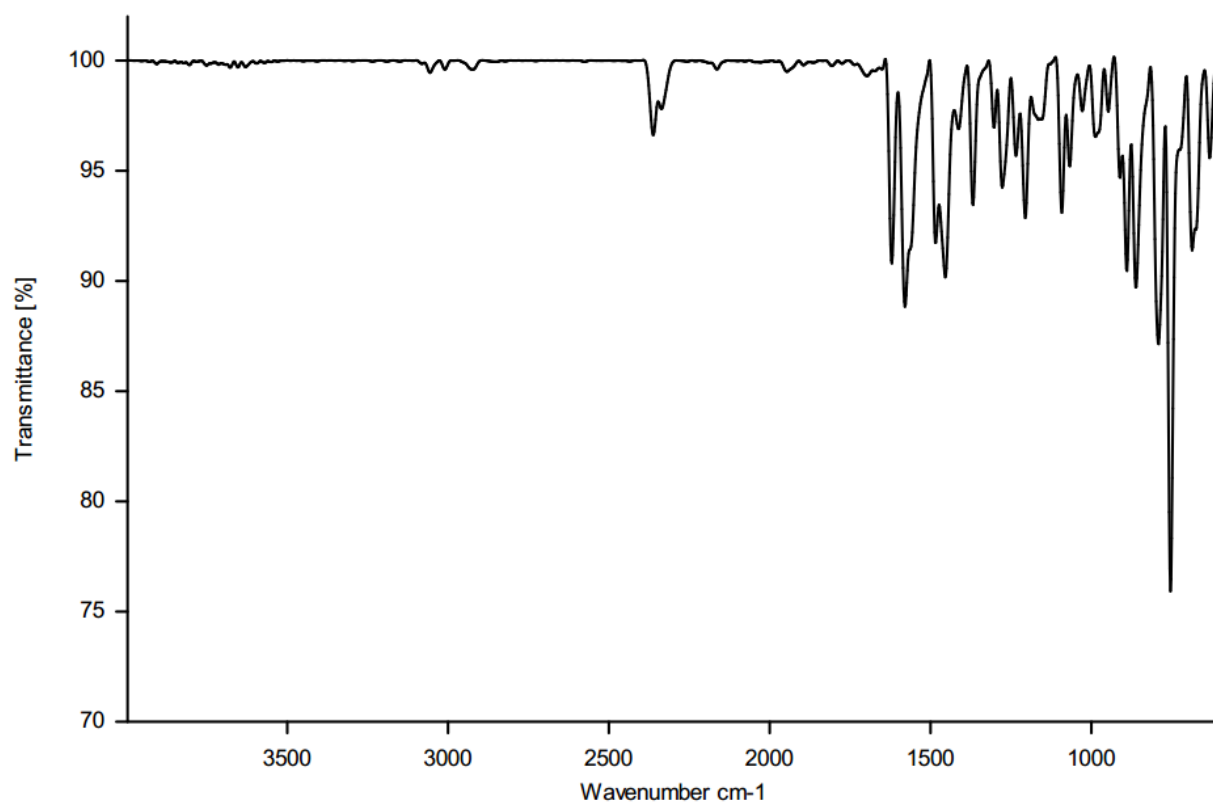

**Figure S2:18     Compound 33**

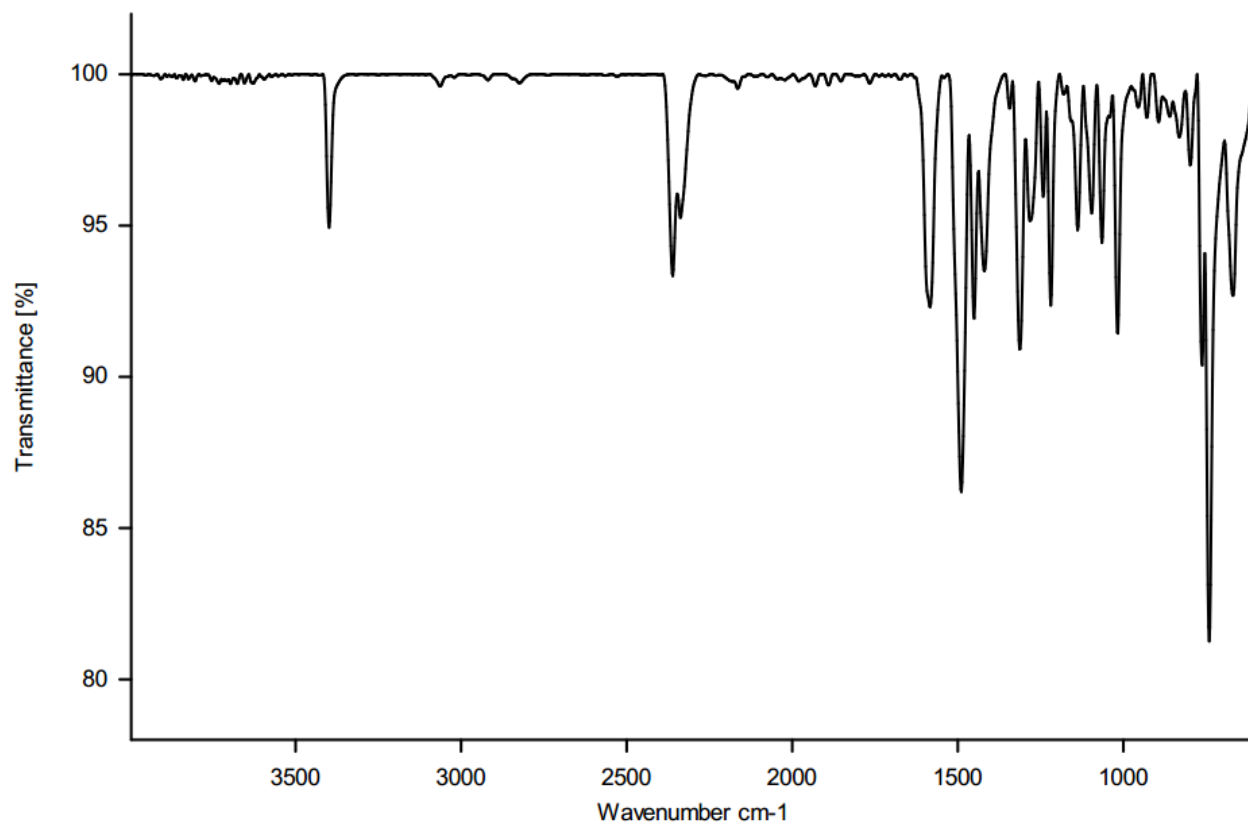

**Figure S2:19     Compound 34**

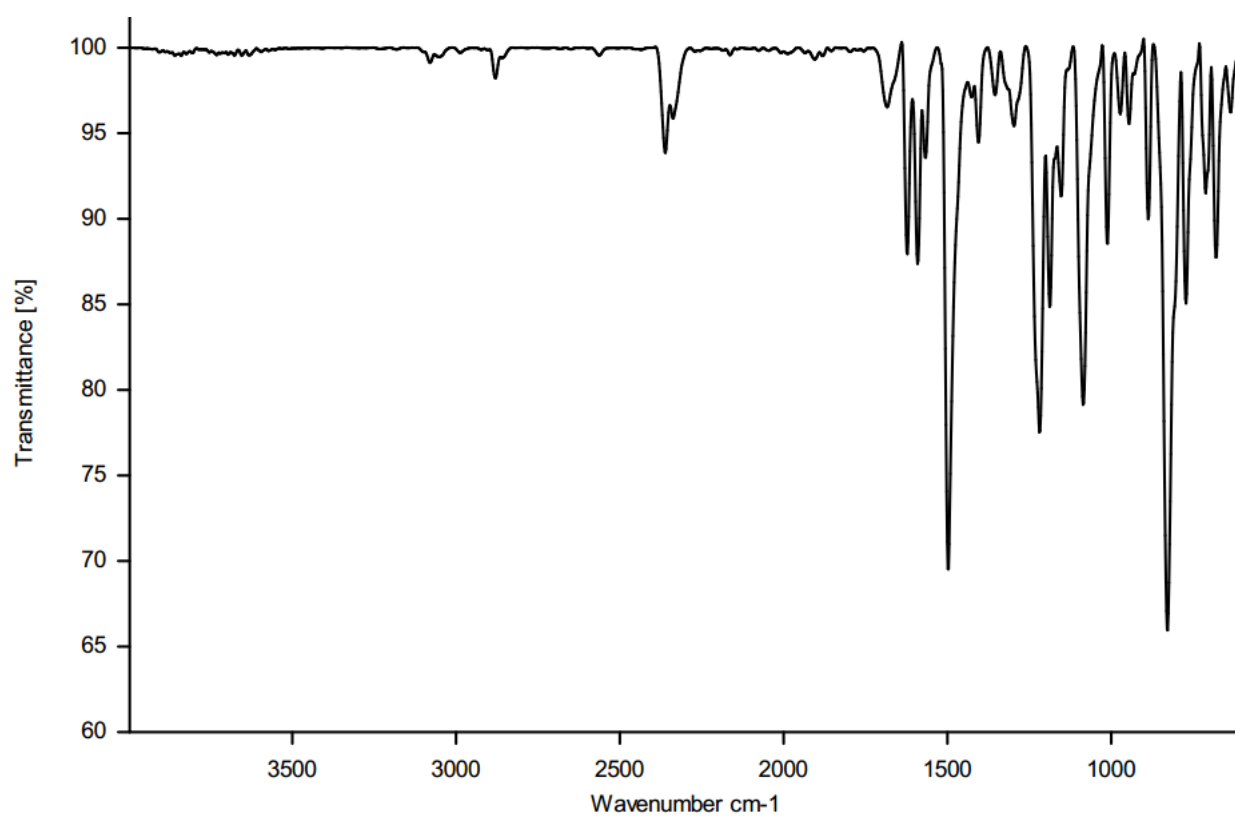

**Figure S2:20     Compound 35**

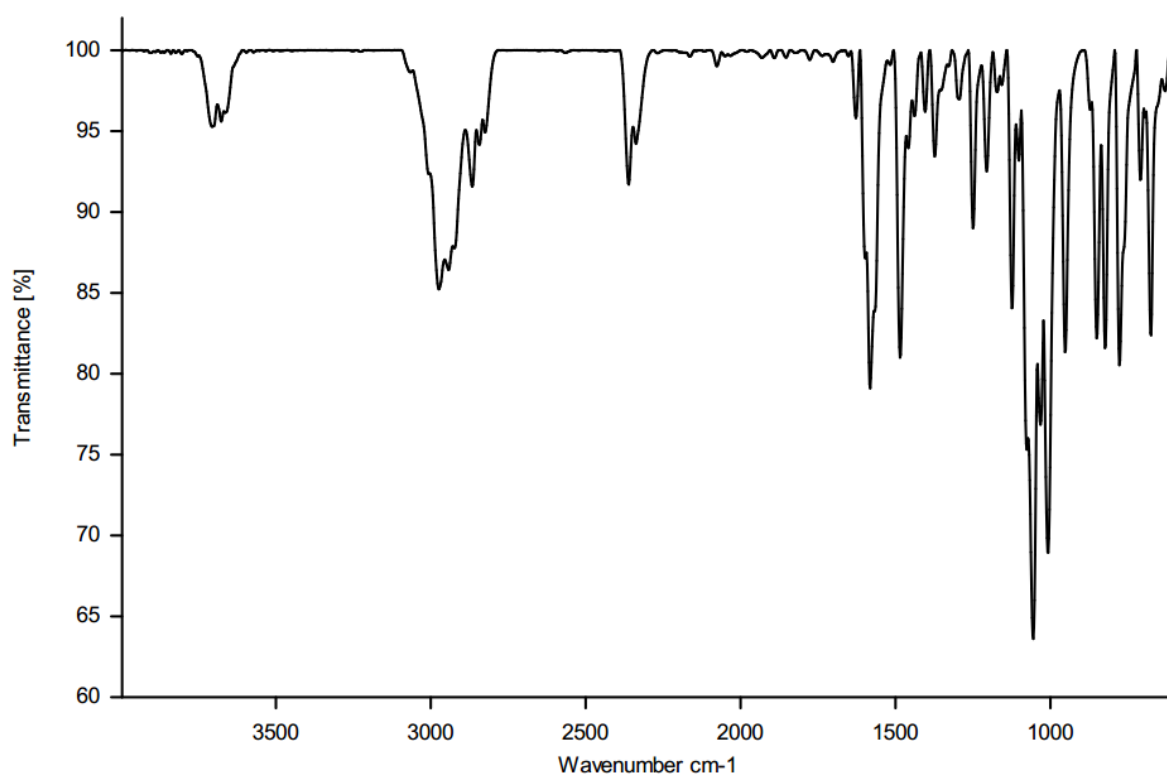

**Figure S2:21     Compound 36**

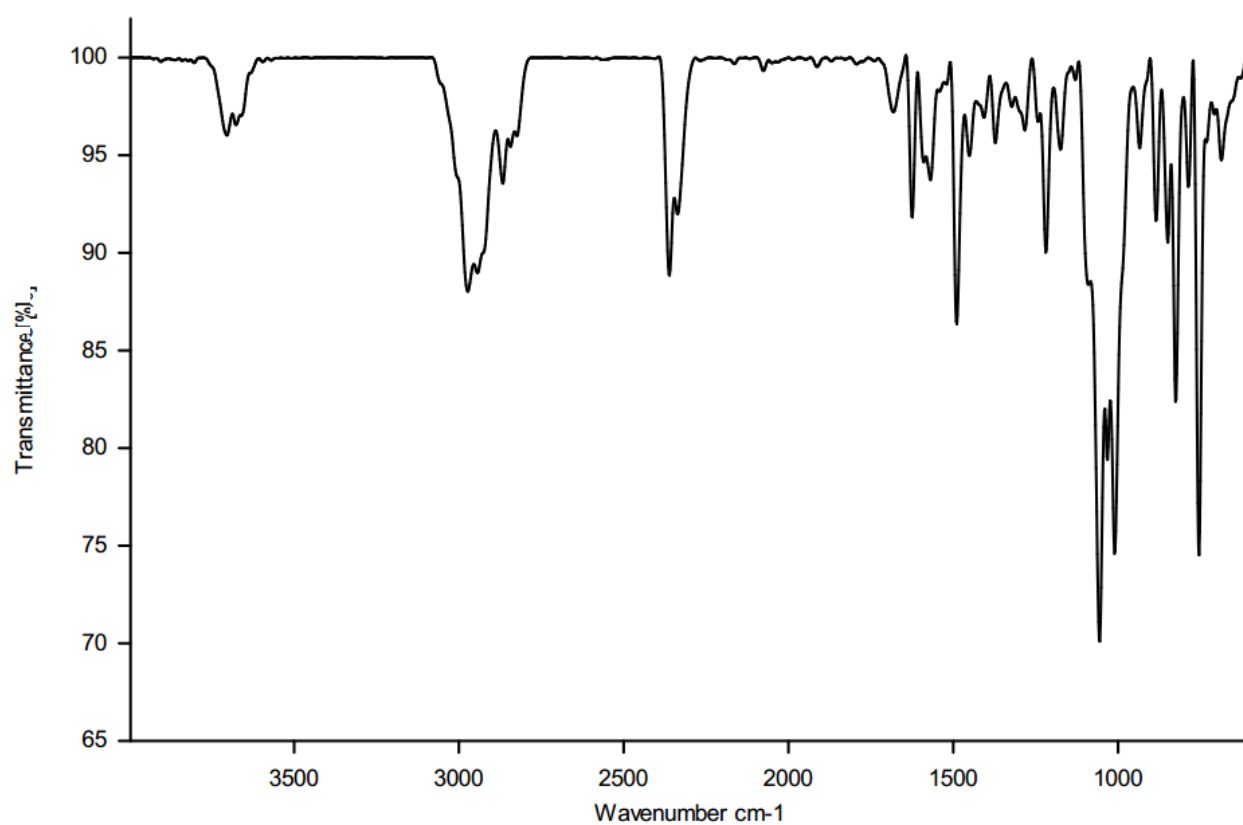

**Figure S2:22     Compound 37**

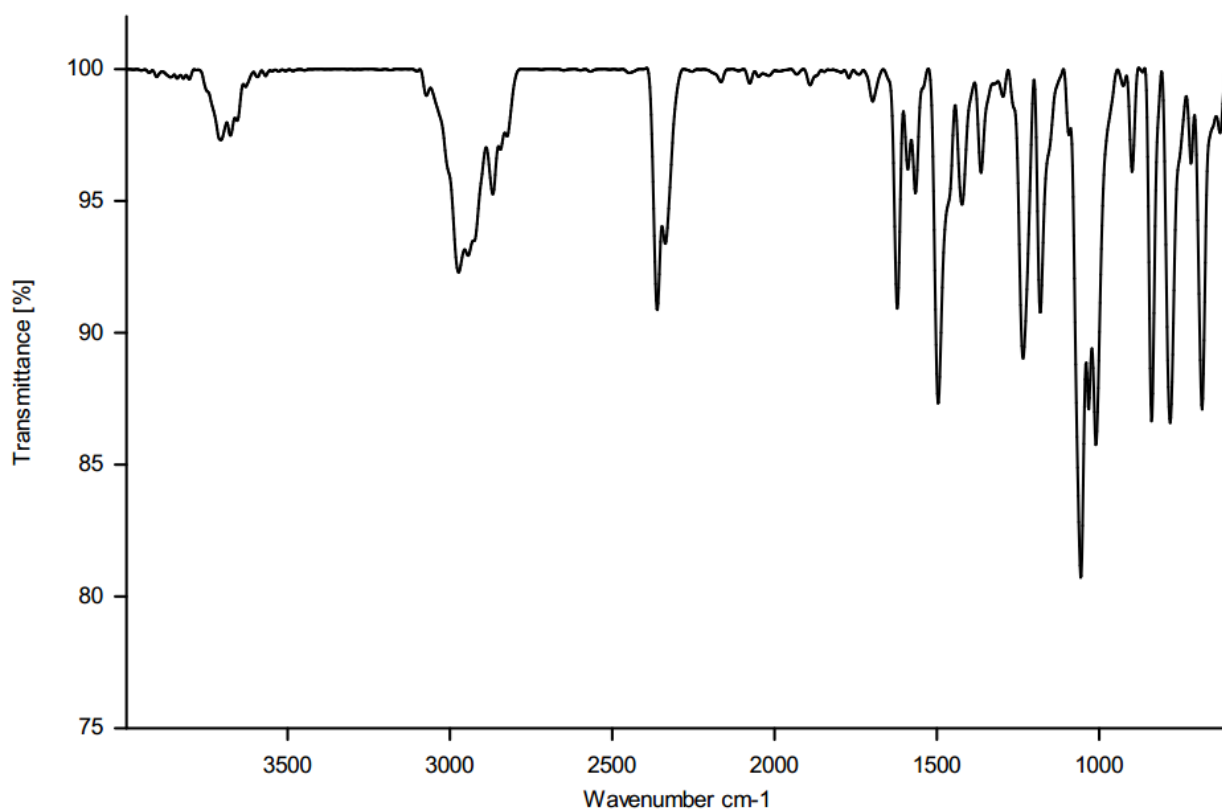

**Figure S2:23     Compound 38**

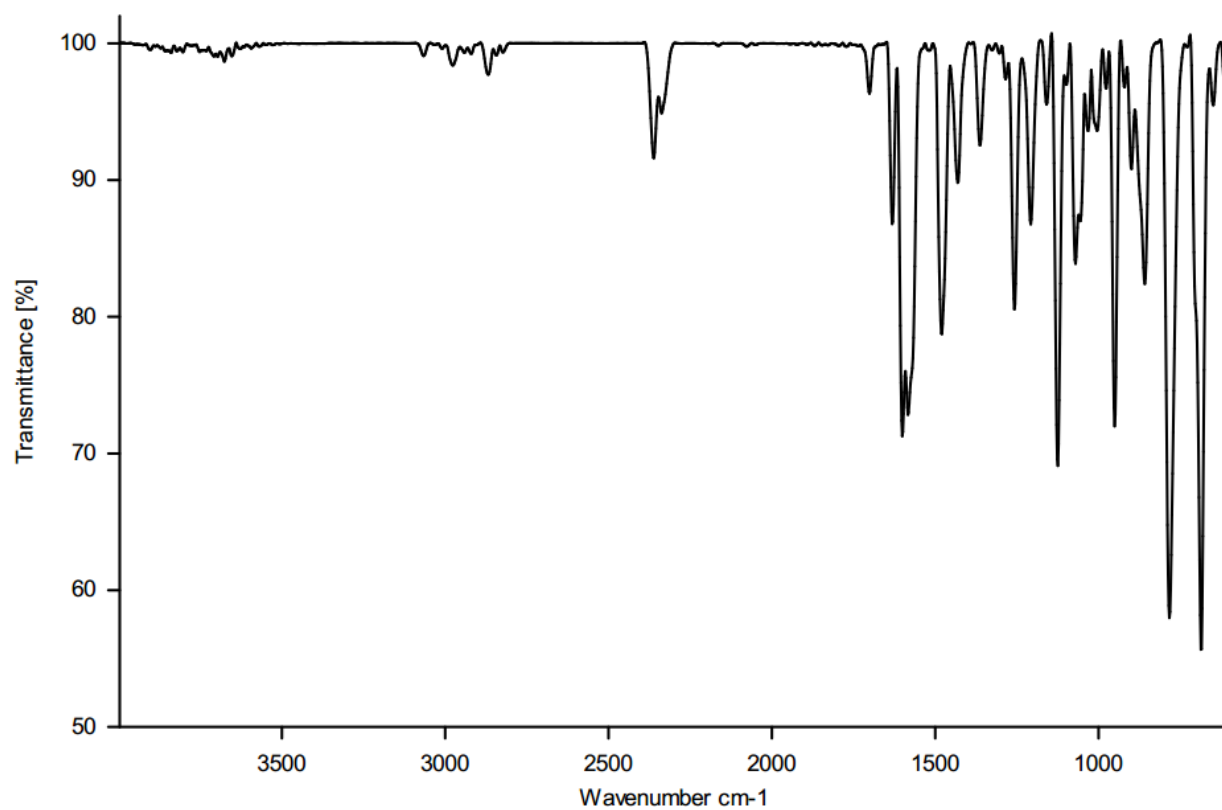

**Figure S2:24     Compound 39**

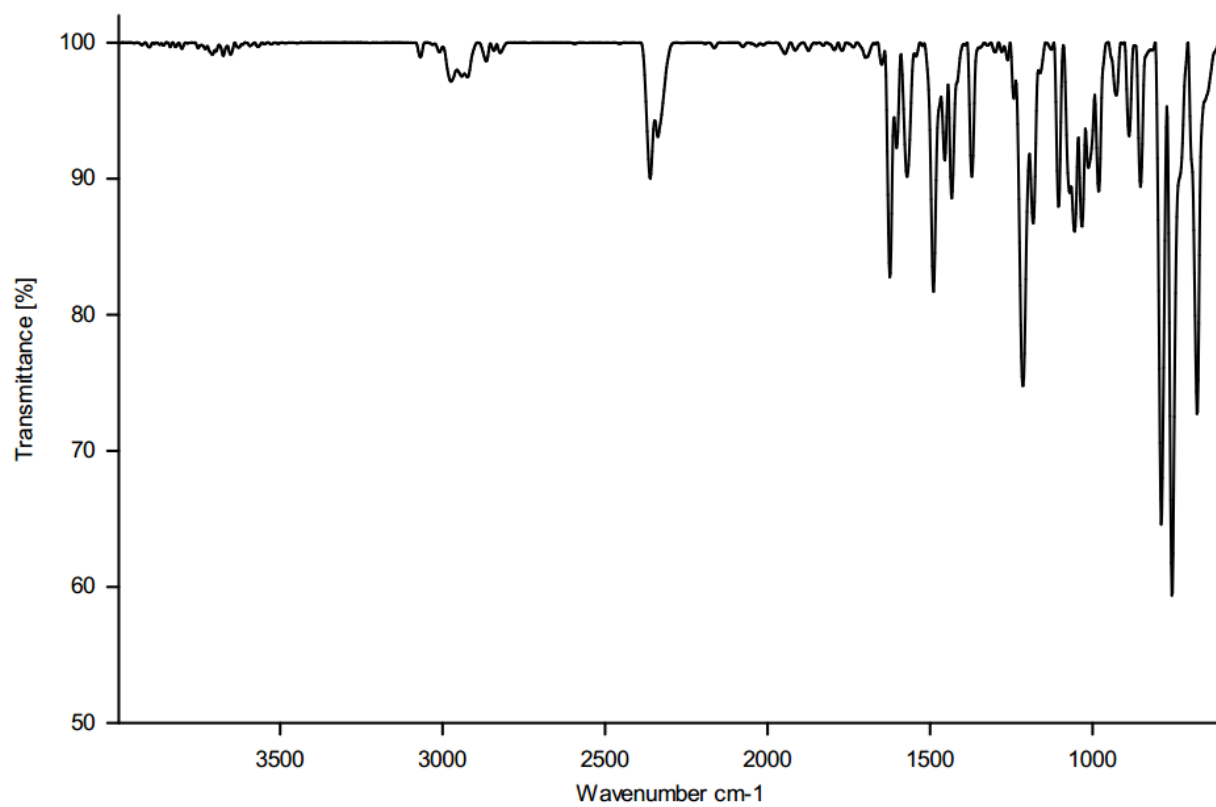



**Figure S2:25     Compound 40**

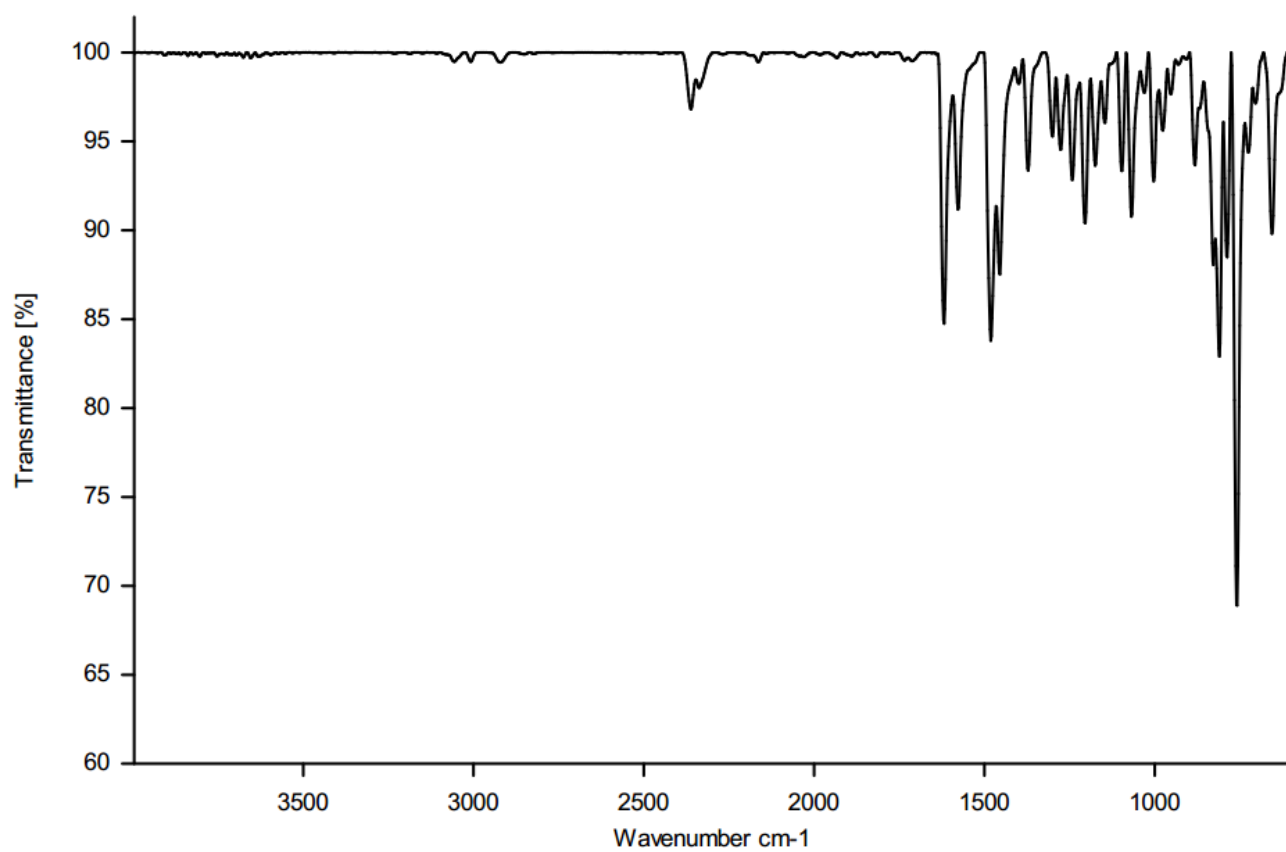

**Figure S2:26     Compound 41**

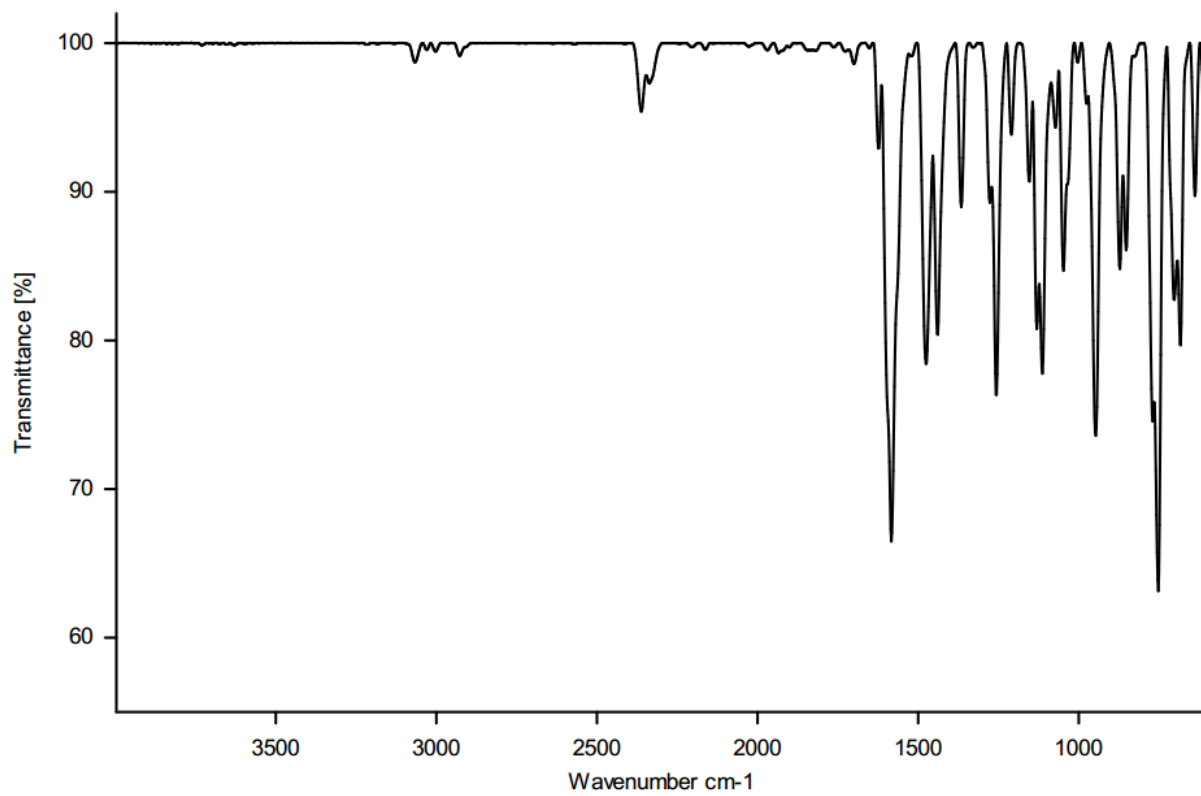

**Figure S2:27     Compound 42**

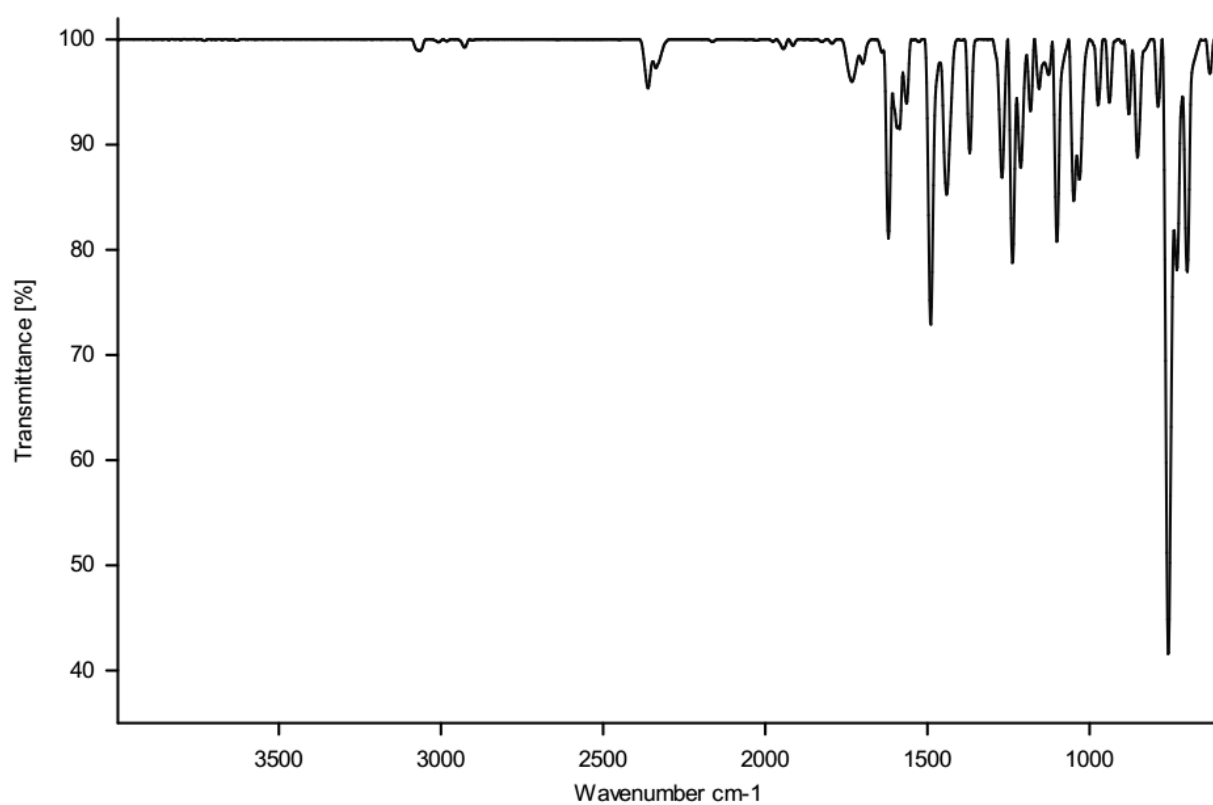

**Figure S2:28     Compound 43**

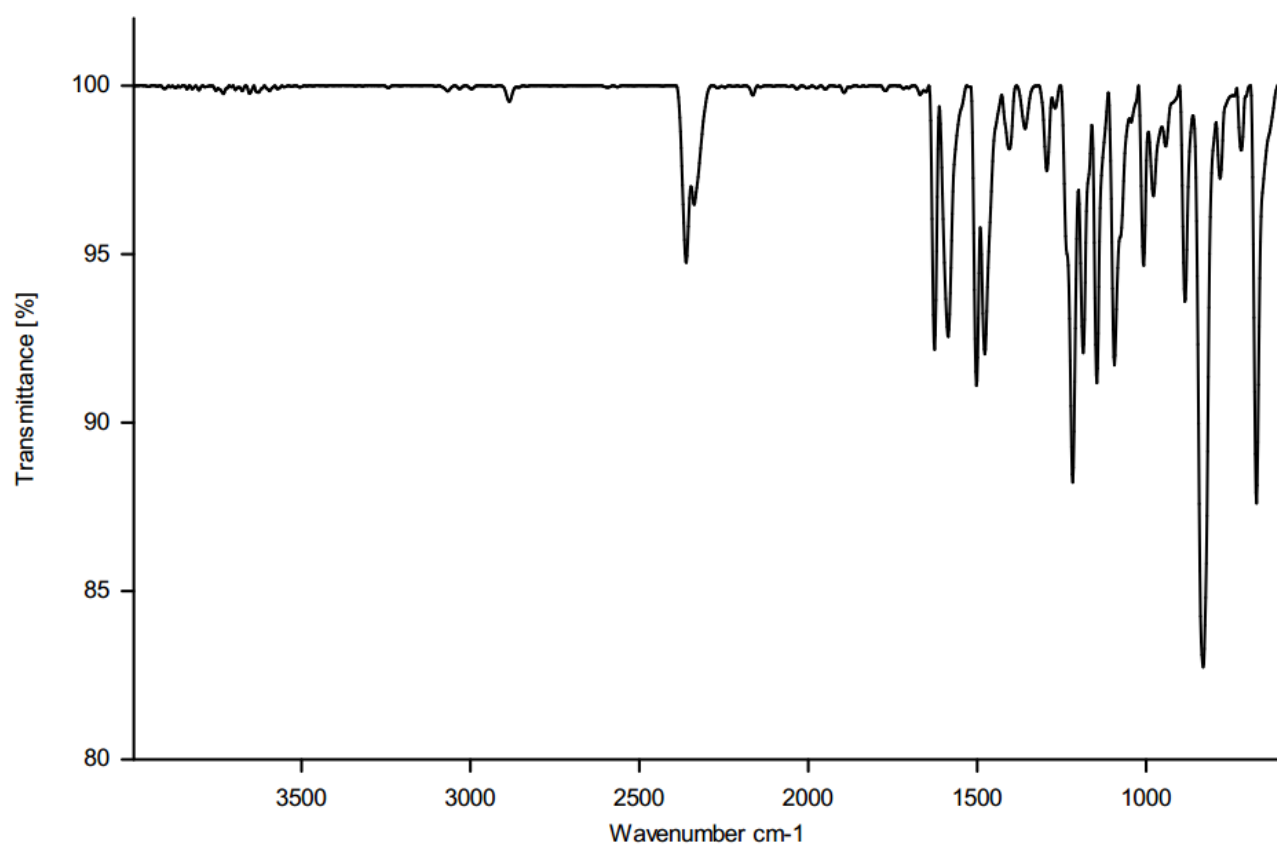

**Figure S2:29      Compound 44**

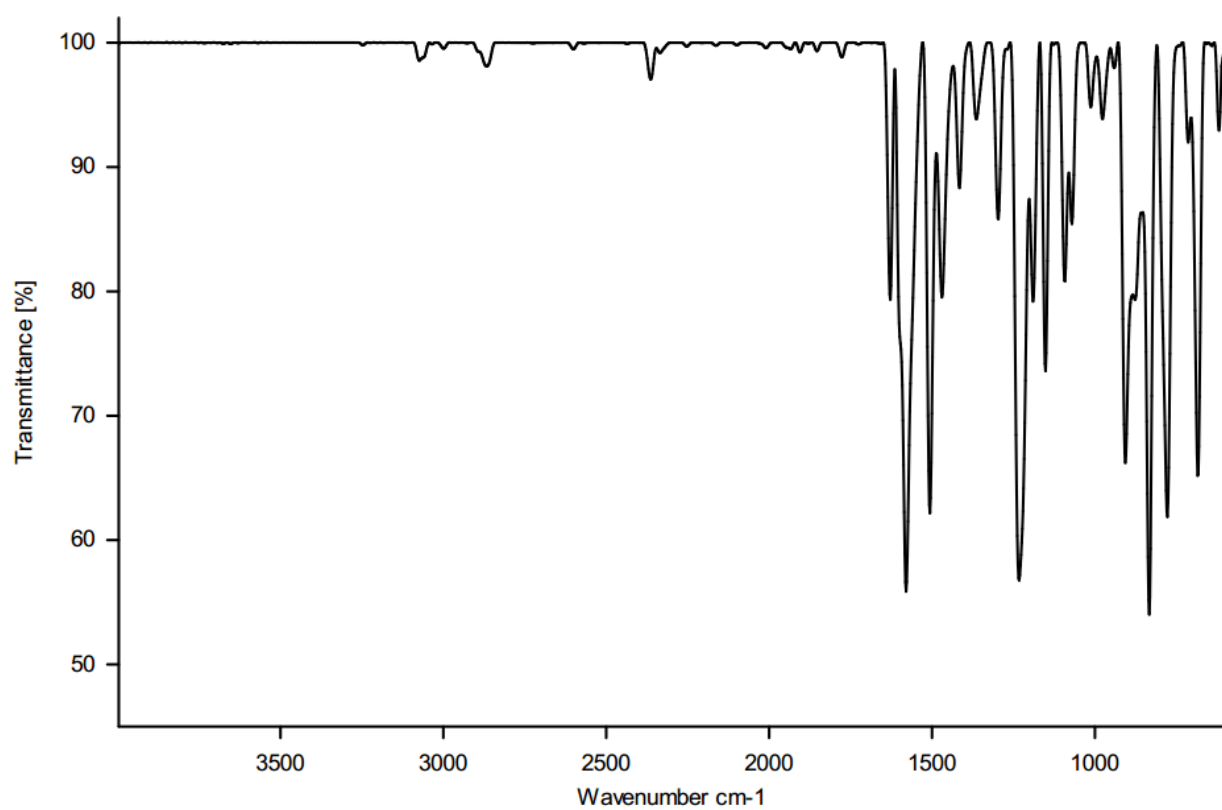

**Figure S2:30      Compound 45**

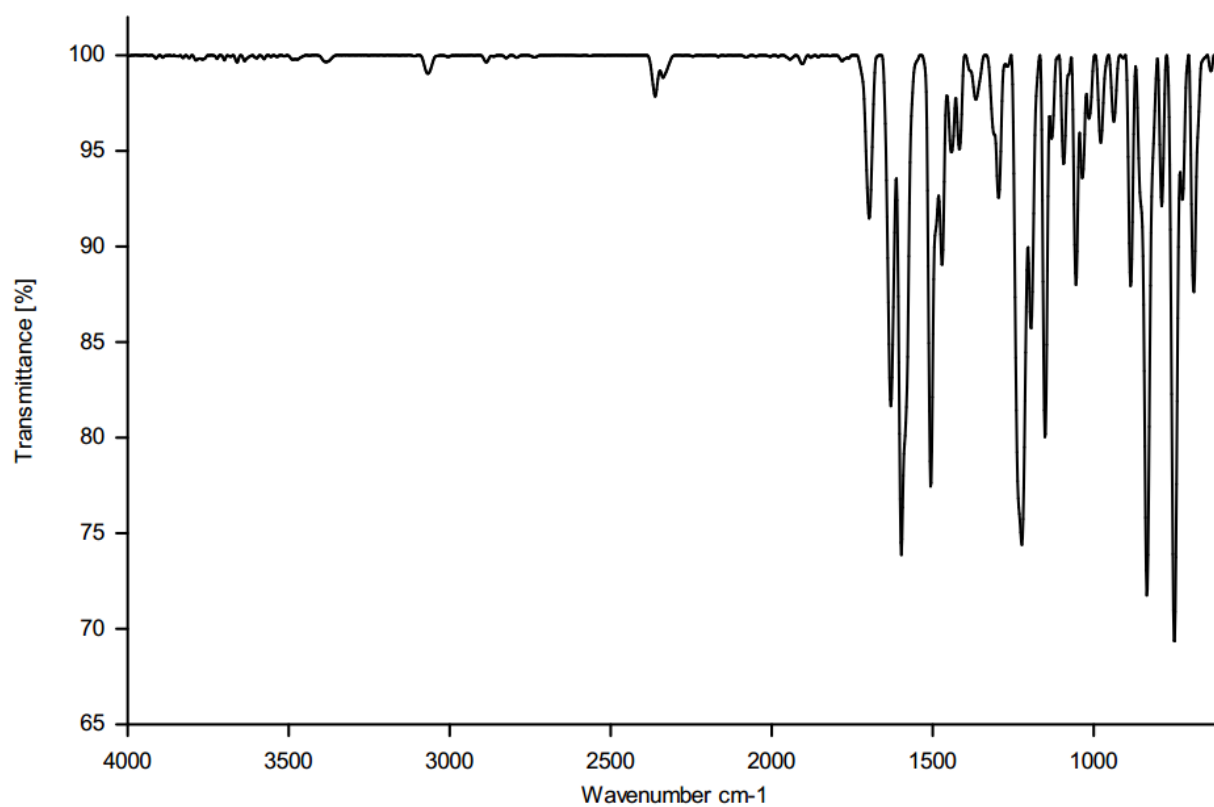

**Figure S2:31     Compound 46**

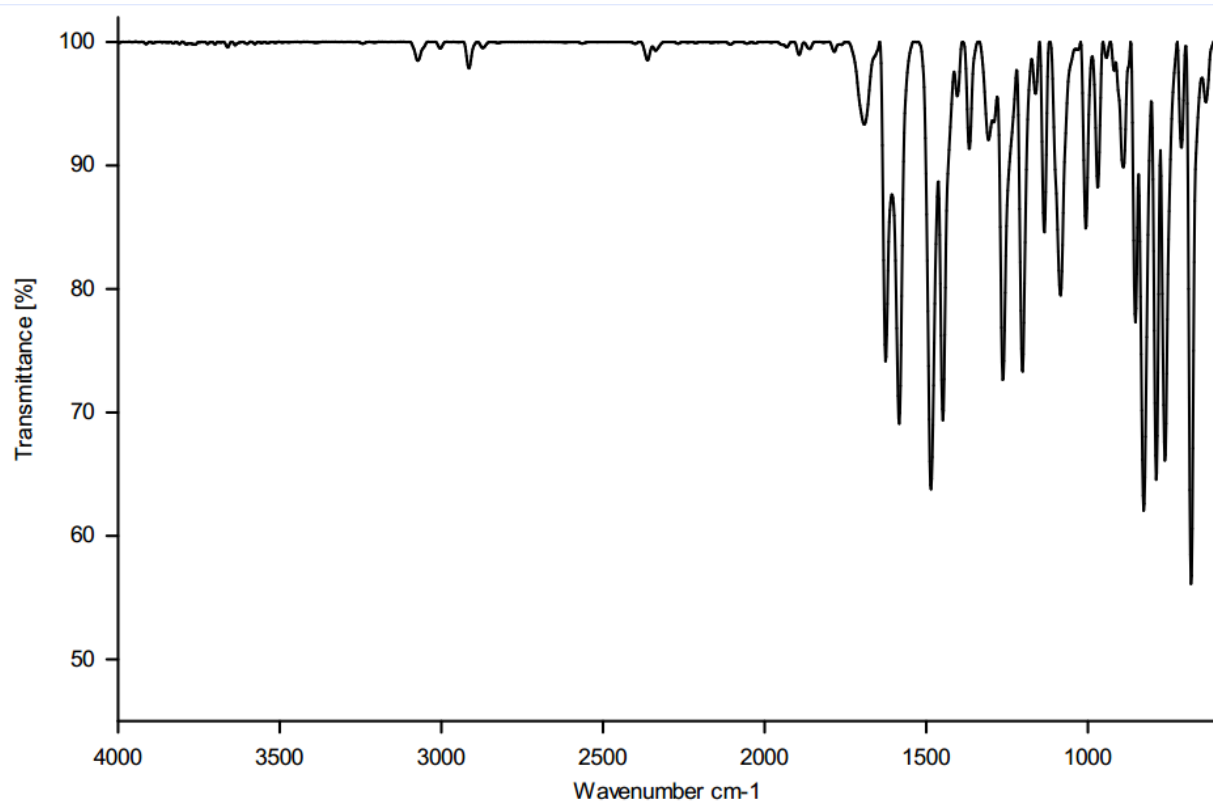

**Figure S2:32     Compound 47**

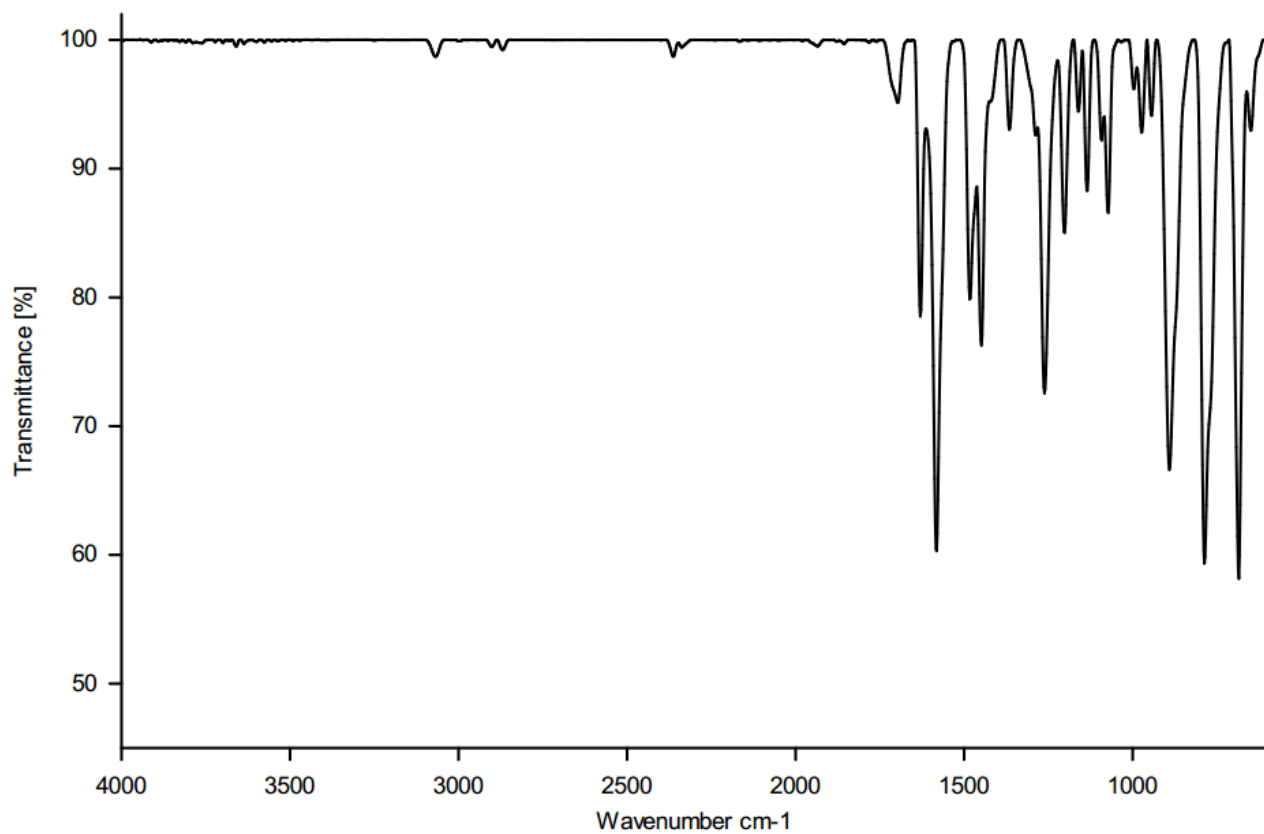

**Figure S2:33      Compound 48**

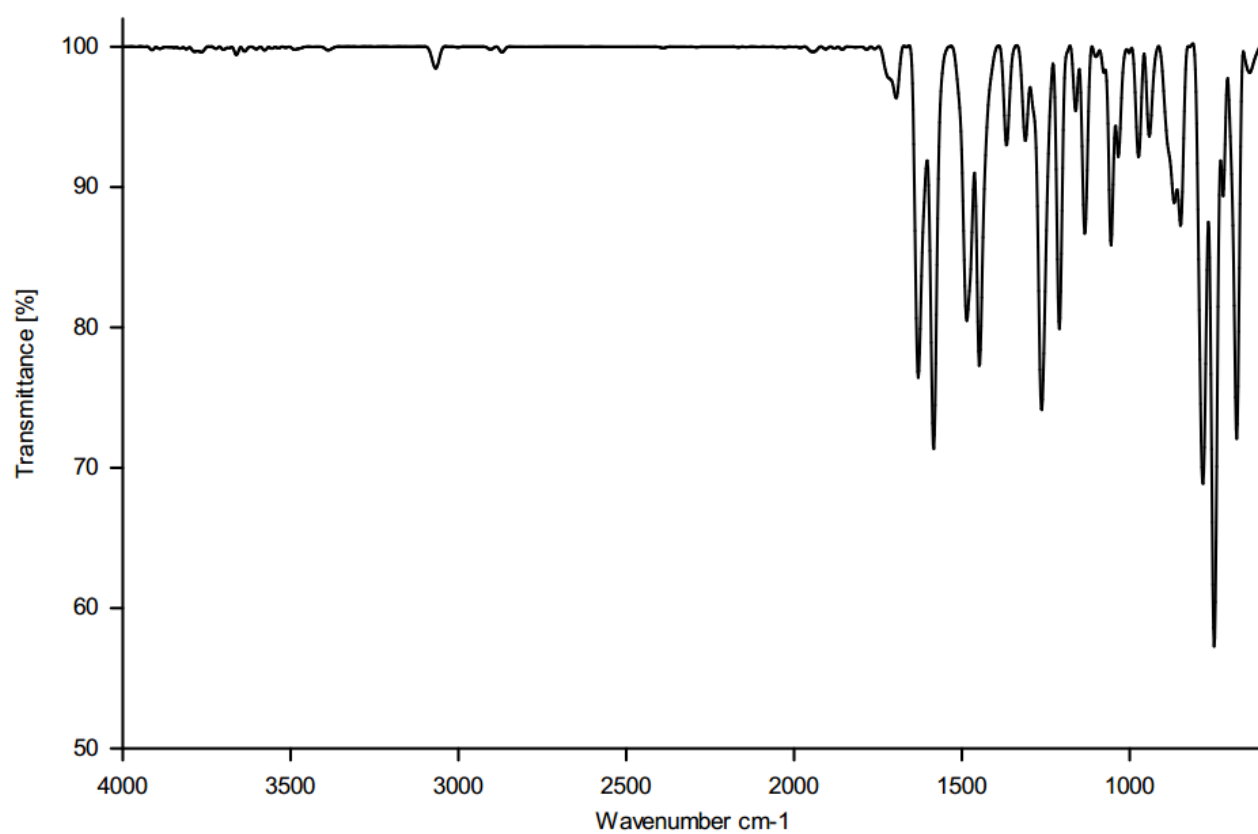

**Figure S2:34      Compound 49**

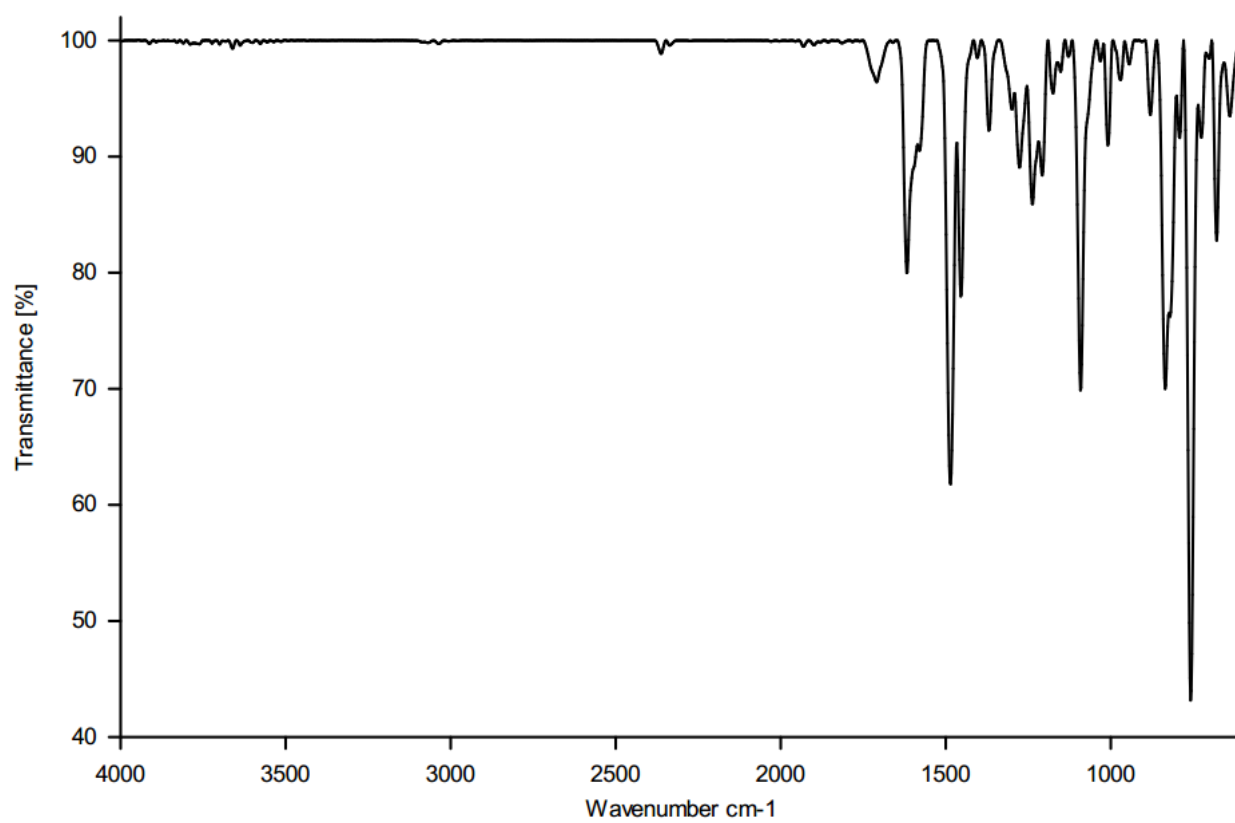

**Figure S2:35     Compound 50**

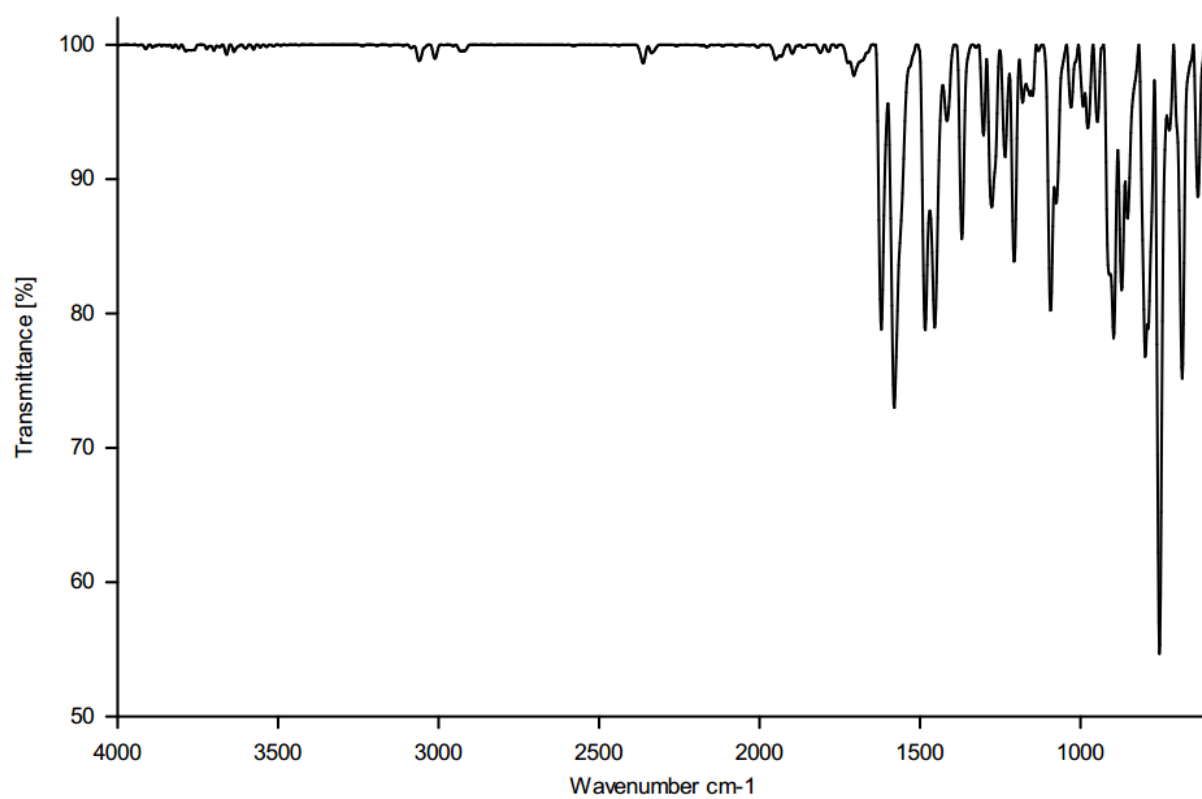

**Figure S2:36     Compound 51**

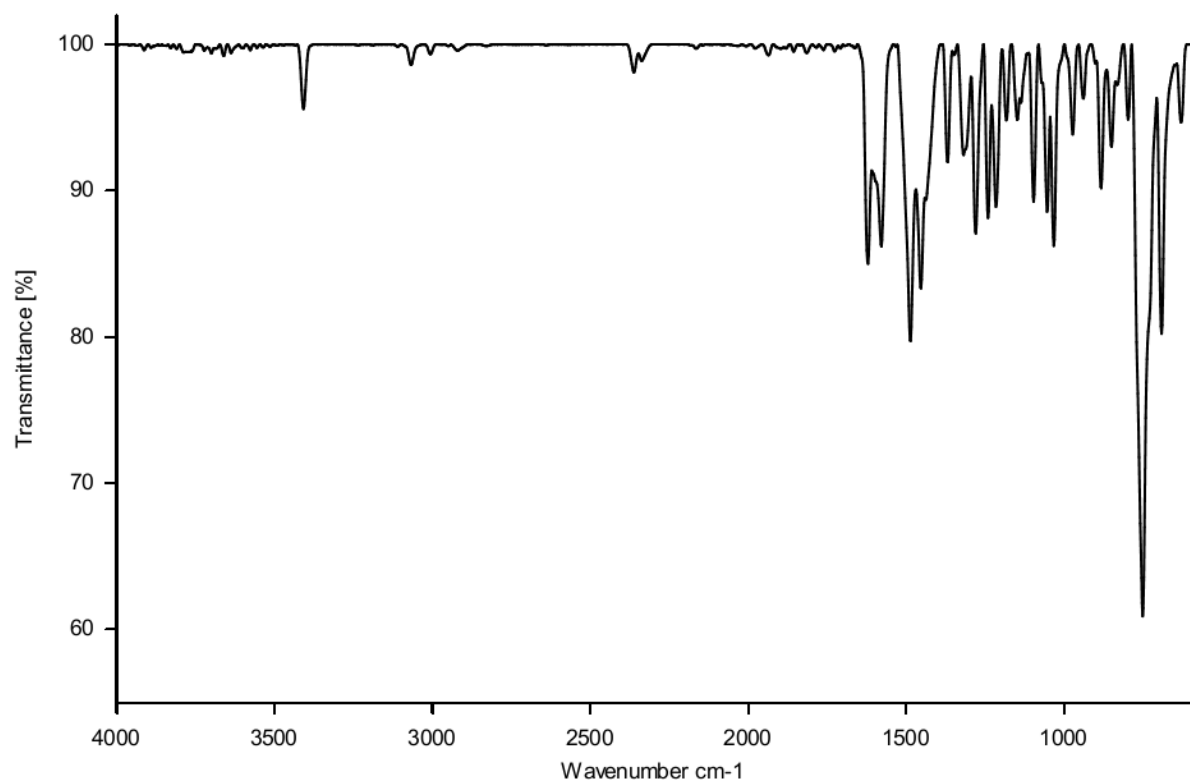

**Figure S3:** Powder X-ray Data for all solid compounds recorded on and their comparison with stimulated PXRD pattern. Patterns displayed in blue colour were recorded on the purified product, while the patterns simulated from the single crystal data are shown in red colour and green colour (2<sup>nd</sup> polymorph).

**Figure S3:1      Compound 16, 16F1, 16F2**

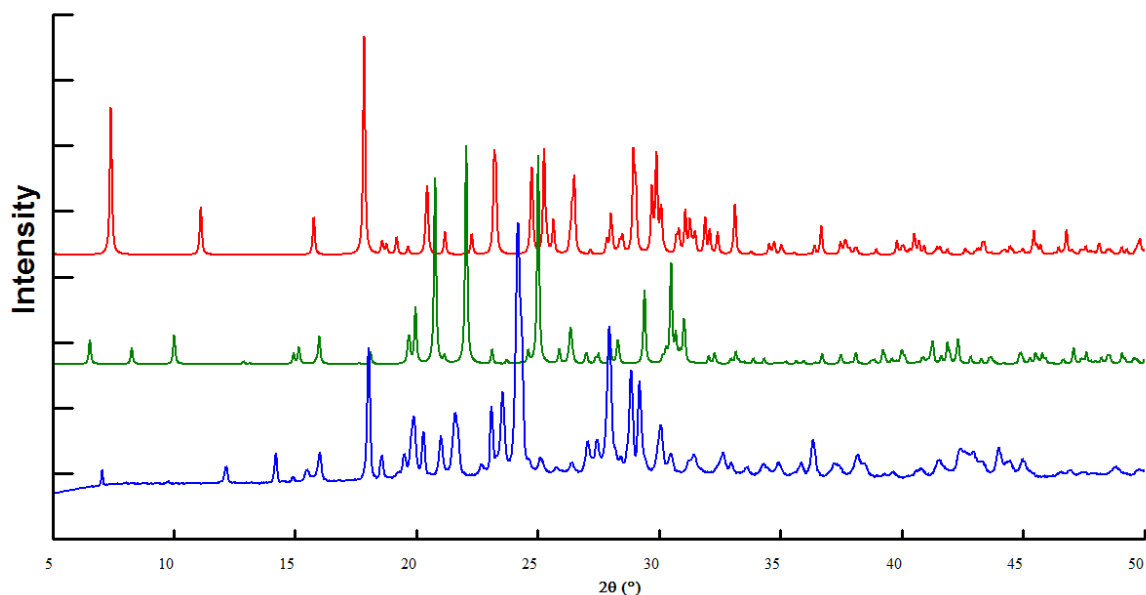

**Figure S3:2      Compound 17**

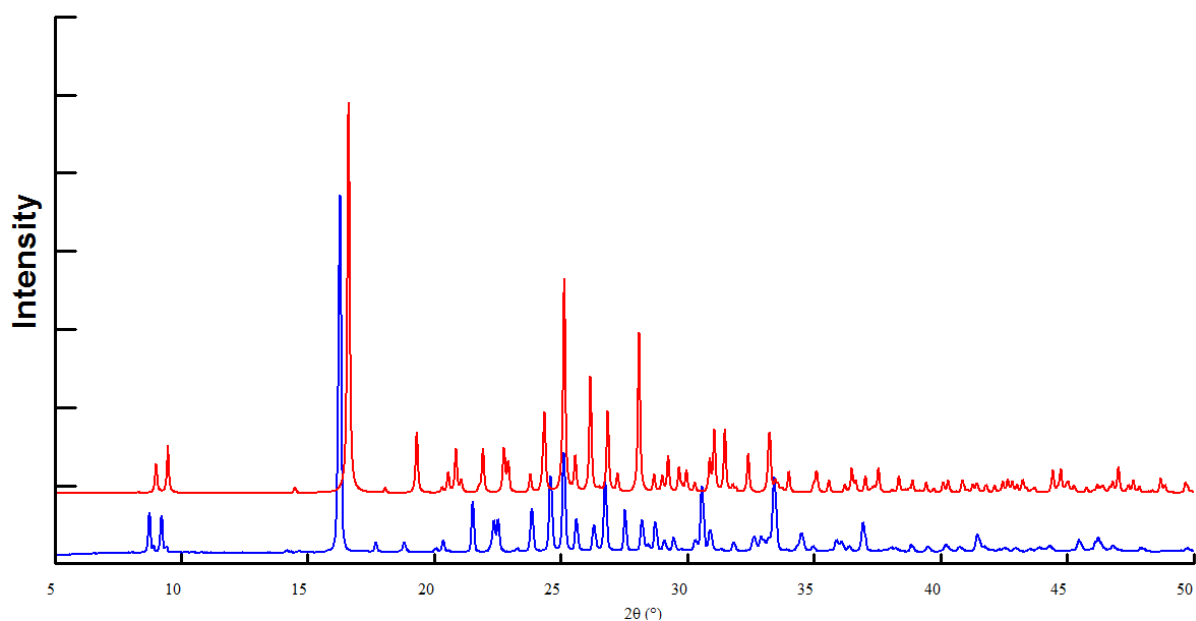

**Figure S3:3      Compound 18**

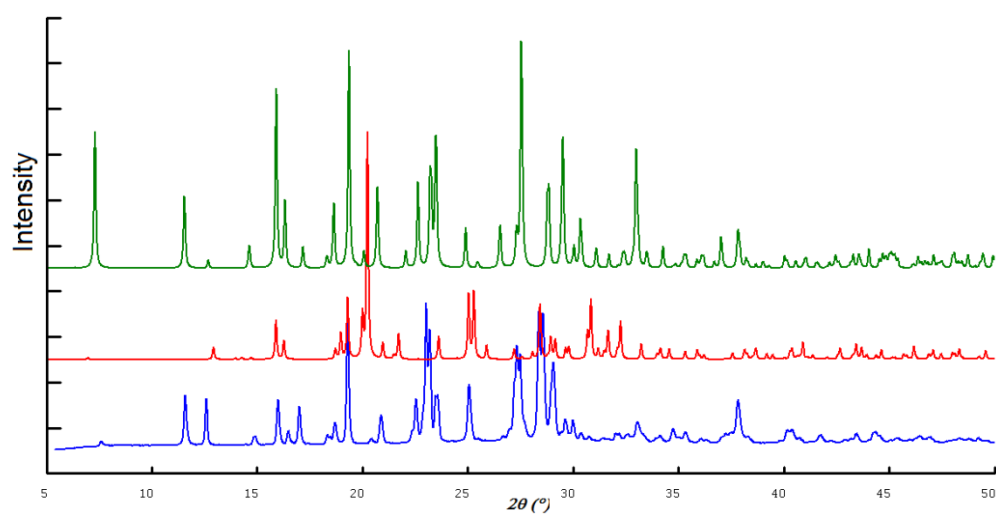

**Figure S3:4      Compound 19**

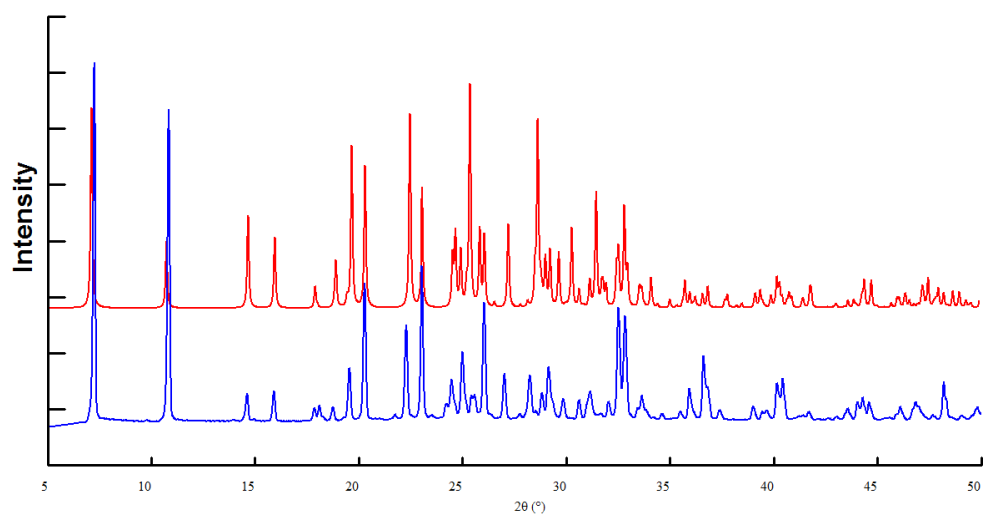

**Figure S3:5      Compound 21**

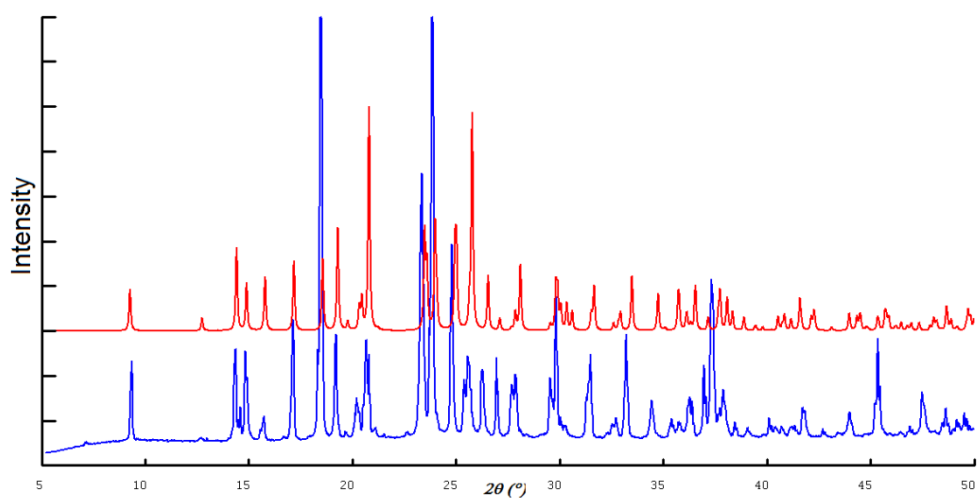



**Figure S3:6      Compound 22**

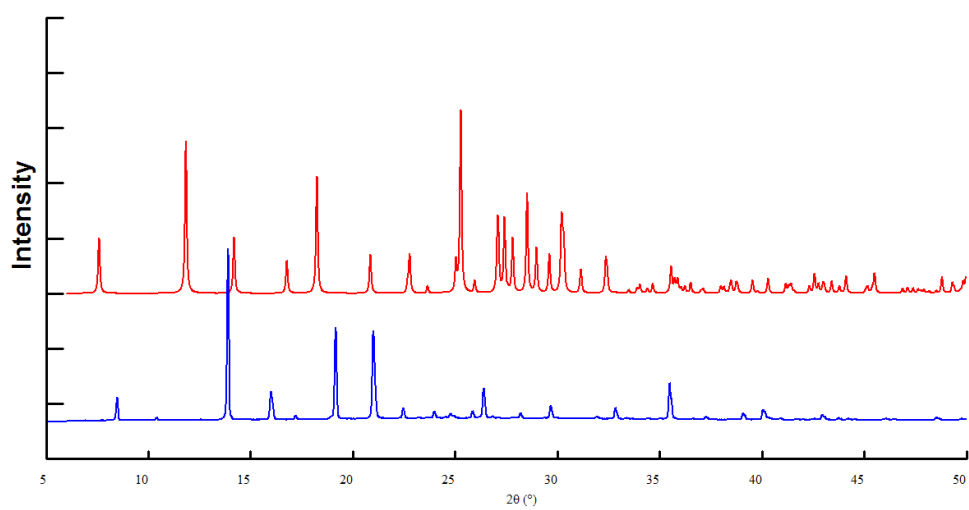

**Figure S3:7      Compound 23**

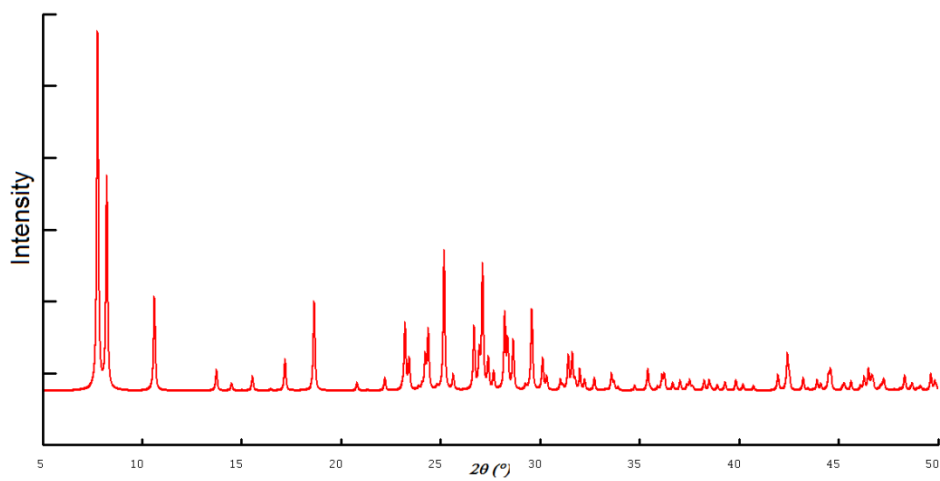

**Figure S3:8      Compound 24**

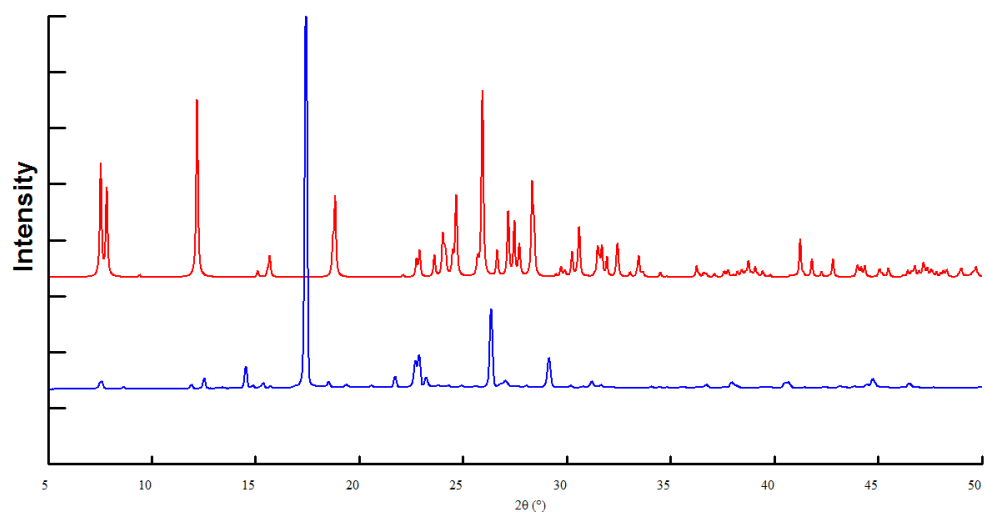

**Figure S3:9      Compound 25**

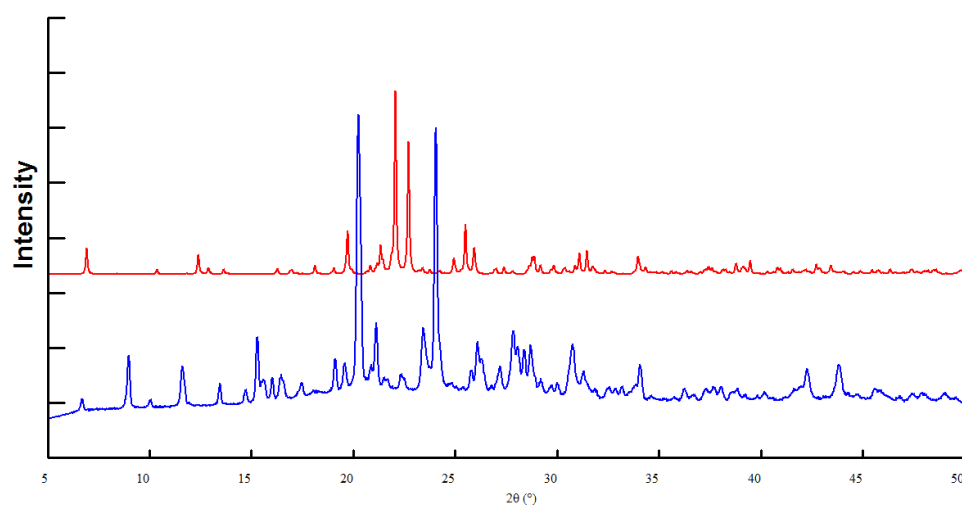

**Figure S3:10      Compound 26**

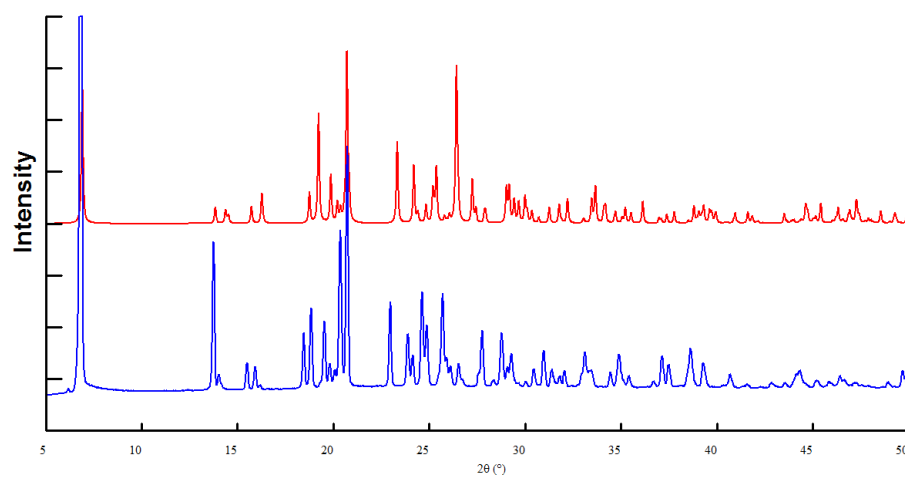

**Figure S3:11      Compound 28, 28F1, 28F2**

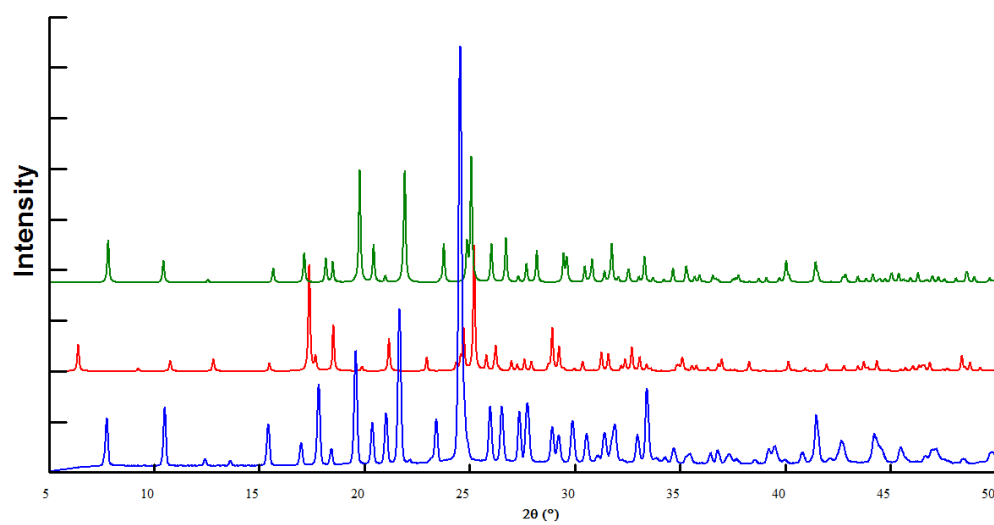

**Figure S3:12    Compound 31**

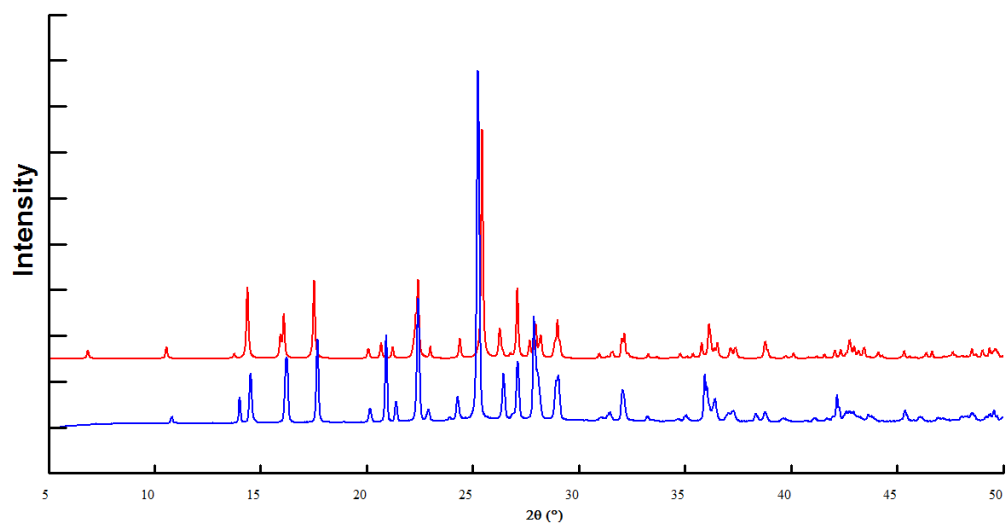

**Figure S3:13    Compound 32**

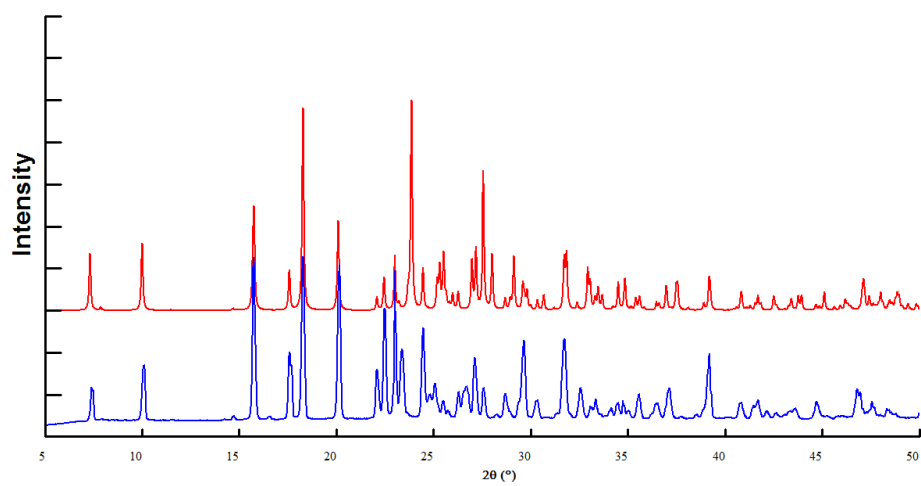

**Figure S3:14    Compound 33**

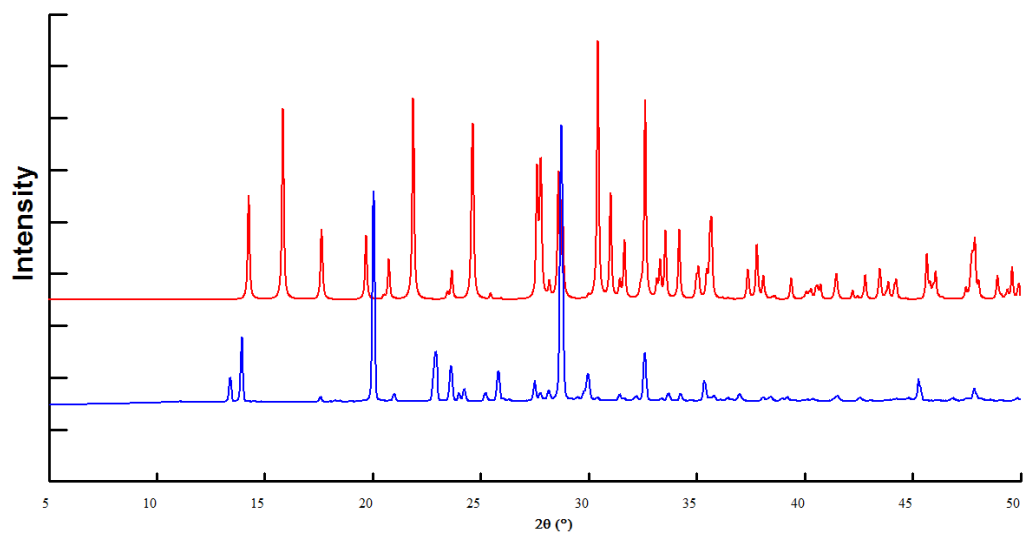

**Figure S3:15    Compound 34**

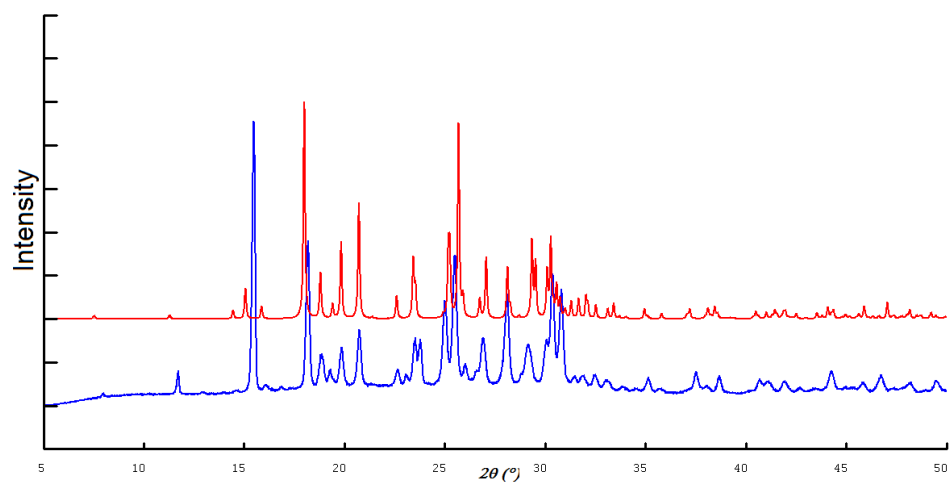

**Figure S3:16    Compound 35**

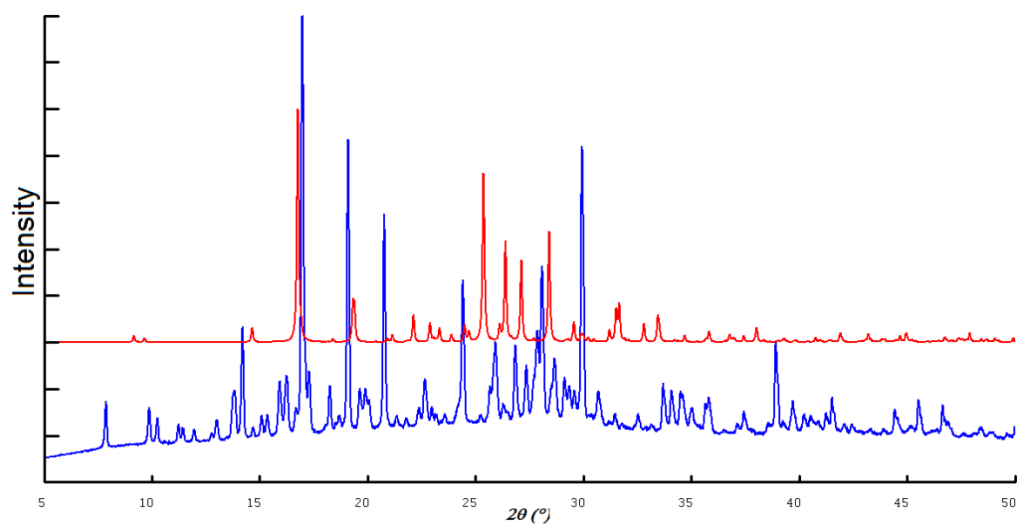

**Figure S3:17    Compound 36**

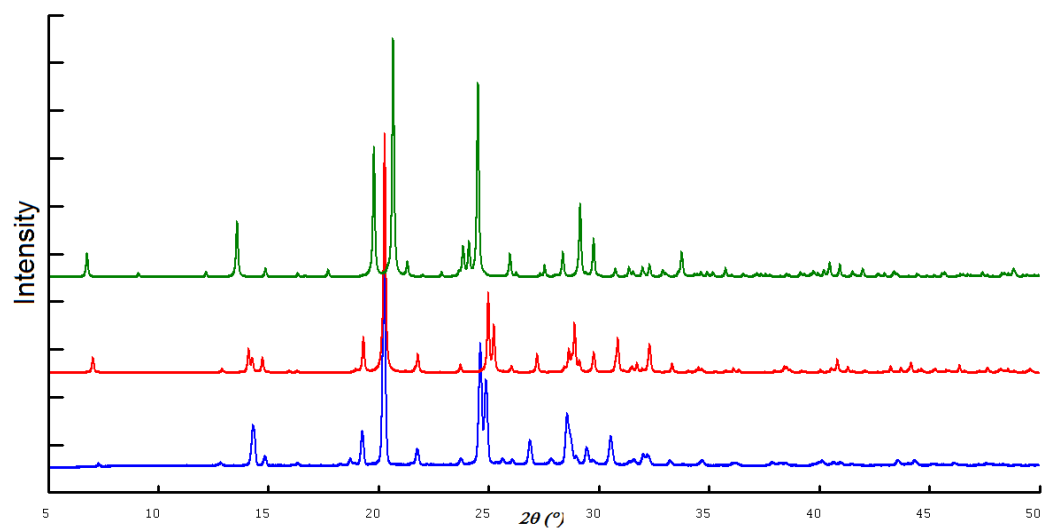

**Figure S3:18    Compound 37**

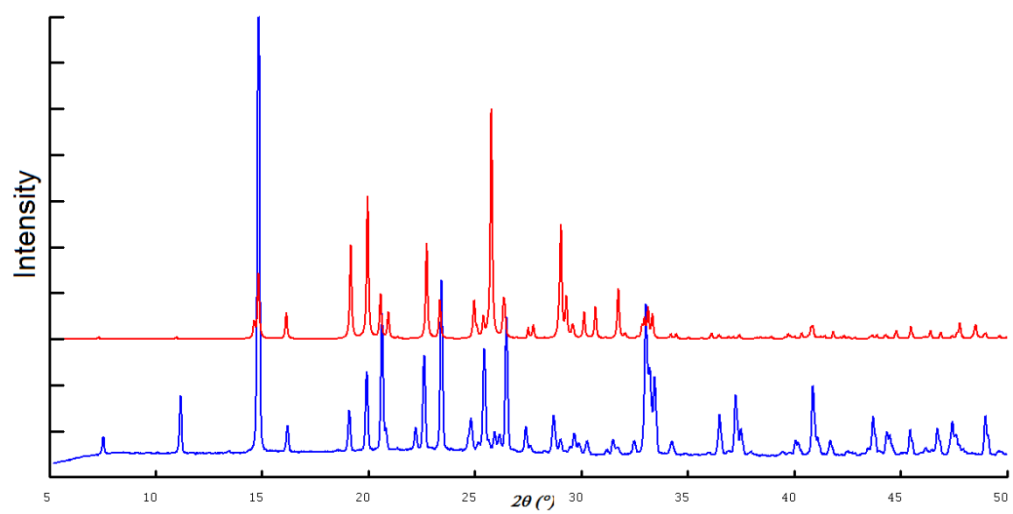

**Figure S3:19    Compound 39**

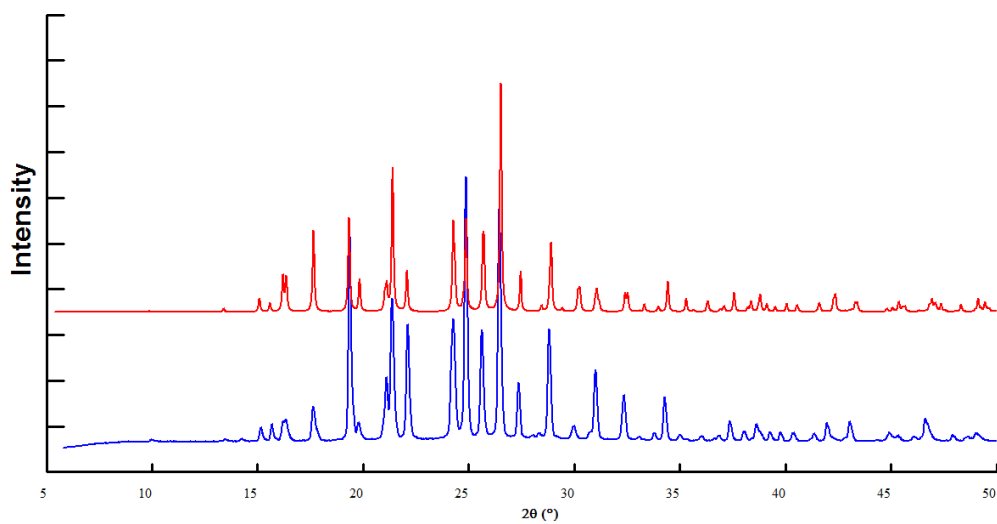

**Figure S3:20    Compound 40**

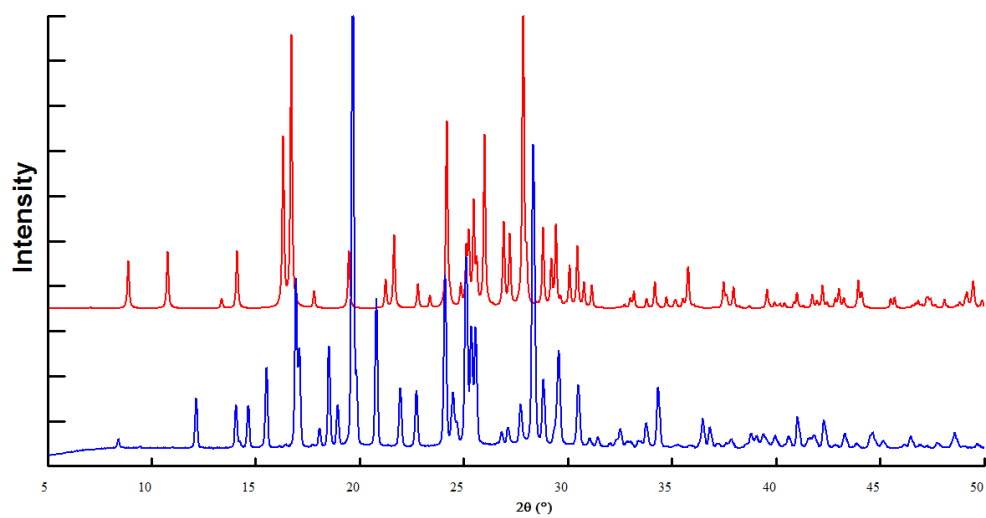

**Figure S3:21    Compound 41**

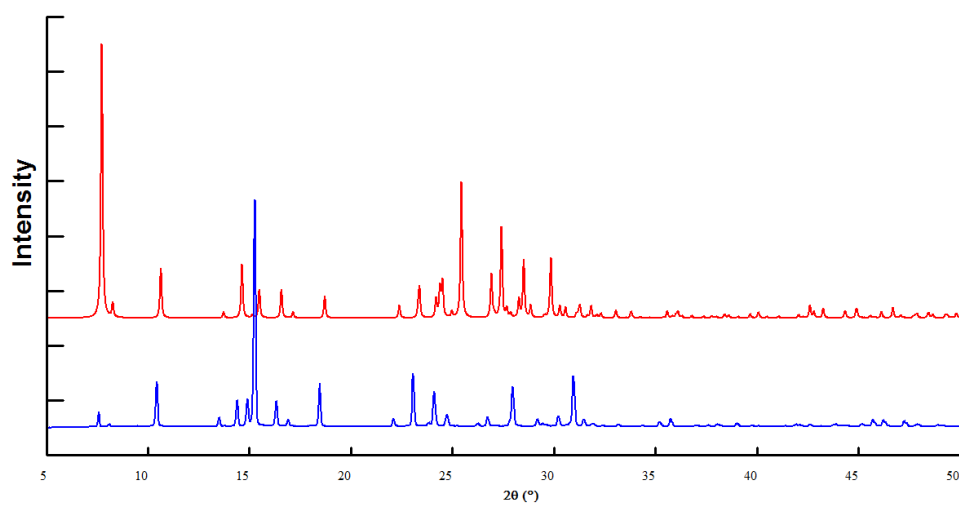

**Figure S3:22    Compound 42**

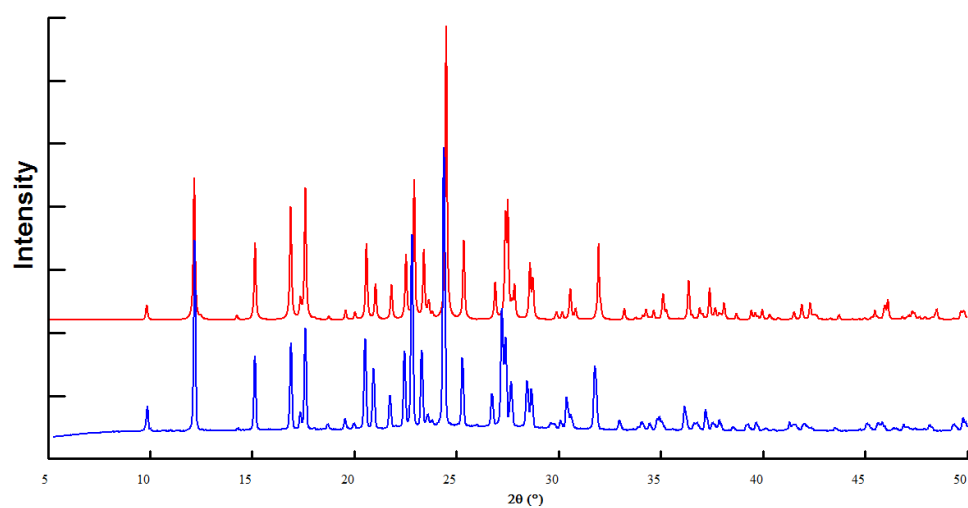

**Figure S3:23    Compound 43**

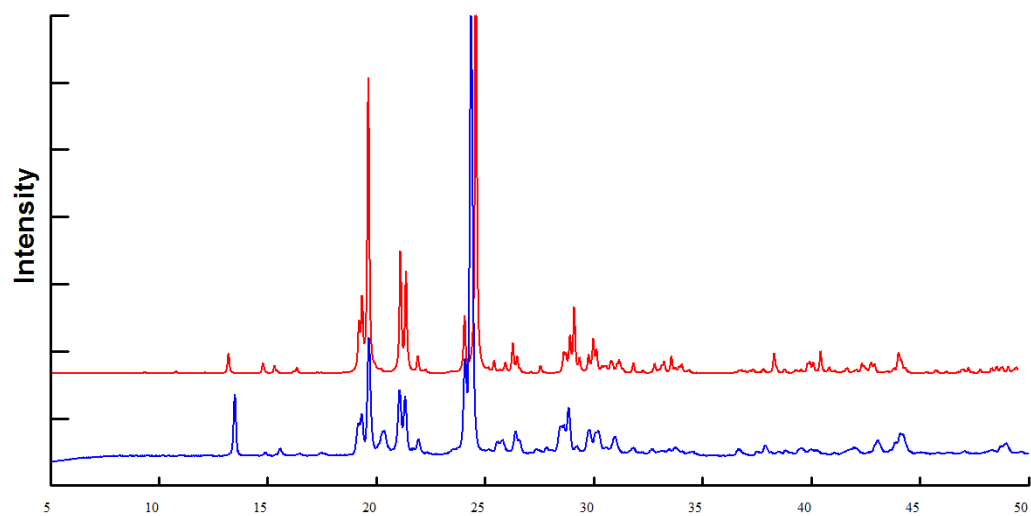

**Figure S3:24    Compound 44**

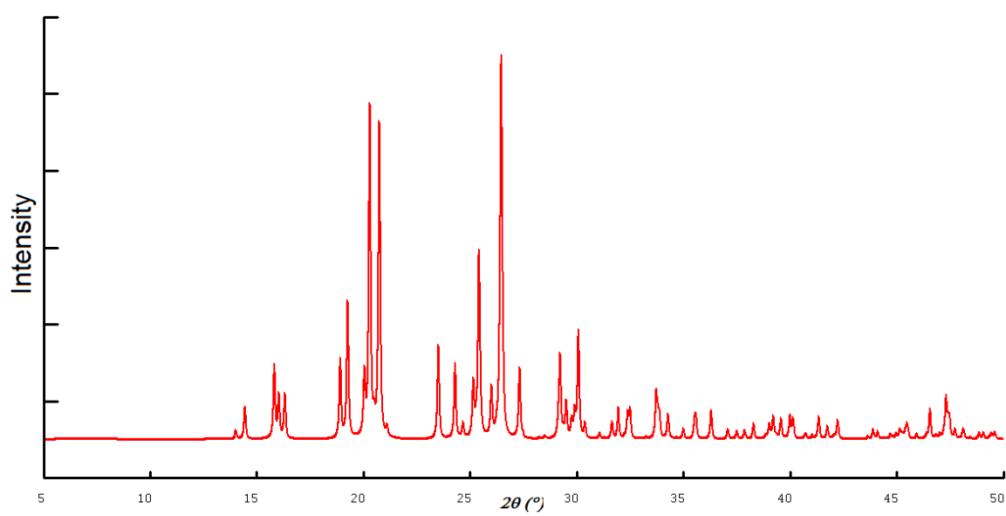

**Figure S3:25    Compound 46**

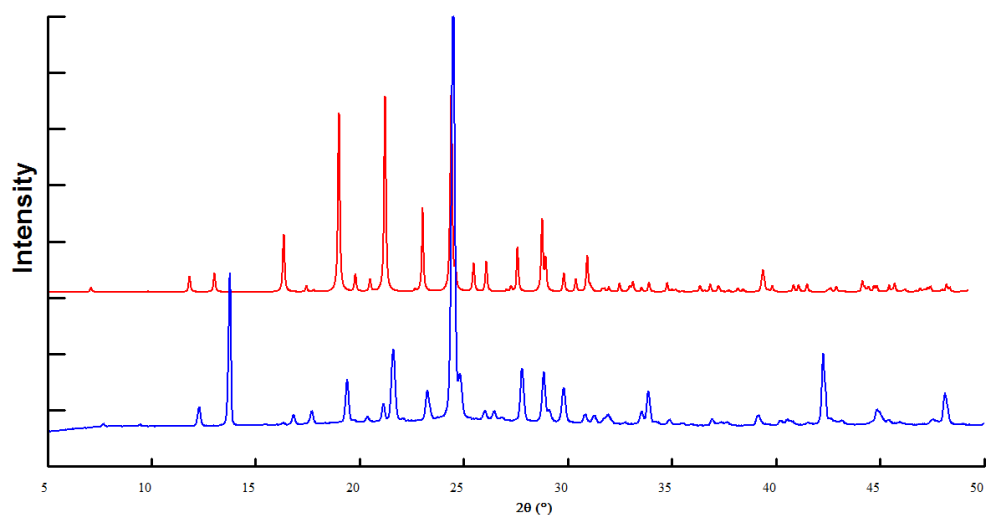

**Figure S3:26    Compound 49**

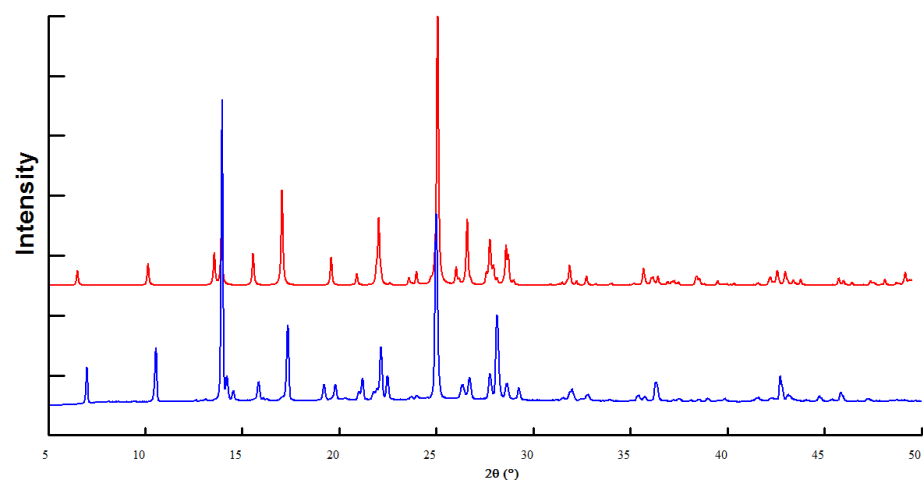

**Figure S3:27    Compound 50**

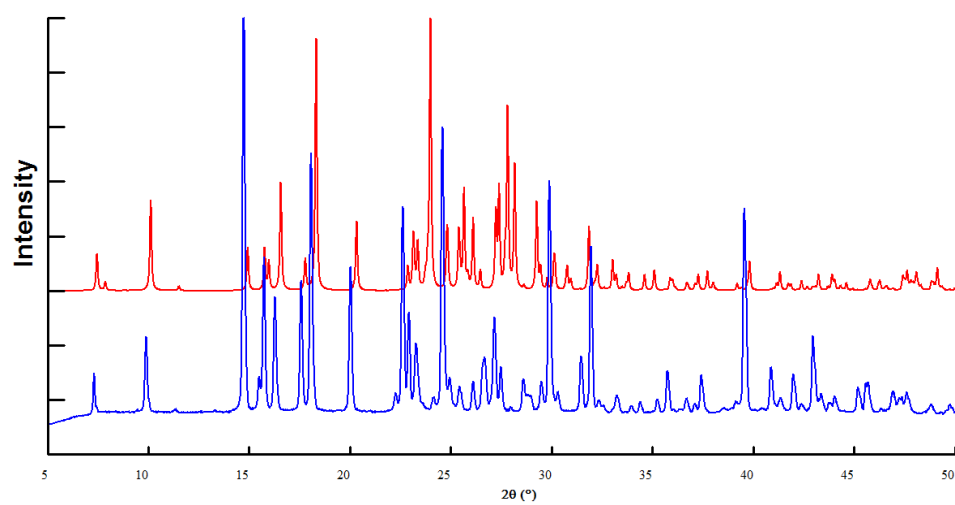

**Figure S3:28    Compound 51**

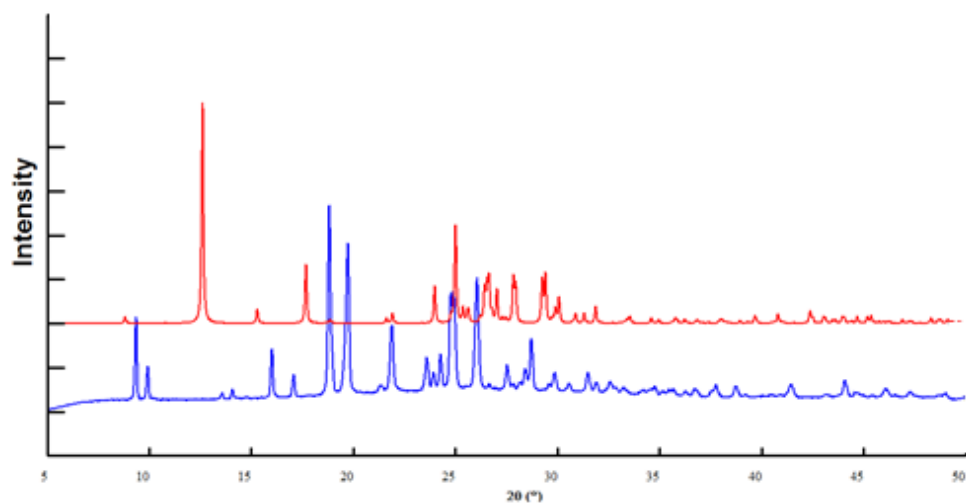



**Table S1: Melting Point (in °C) of solid compounds determined from DSC data:**

| <b>Compound Code</b> | <b>Melting point (M.P.) /°C<br/>(Onset value from DSC)</b> | <b>ΔH (J/g)</b> |
|----------------------|------------------------------------------------------------|-----------------|
| 16                   | 62.46                                                      | 63.70           |
| 17                   | 51.41                                                      | 81.05           |
| 18                   | 68.39                                                      | 73.85           |
| 19                   | 34.44, 33.05                                               | 66.14, 16.42    |
| 20                   | --                                                         | --              |
| 21                   | 40.29                                                      | 65.07           |
| 22                   | 49.07                                                      | 72.33           |
| 23                   | 29.07                                                      | 59.47           |
| 24                   | 47.72                                                      | 61.89           |
| 25                   | 57.22                                                      | 64.05           |
| 26                   | 35.38                                                      | 65.62           |
| 27                   | --                                                         | --              |
| 28                   | 69.84                                                      | 80.02           |
| 29                   | -7.42                                                      | 45.12           |
| 30                   | --                                                         | --              |
| 31                   | 65.63                                                      | 60.36           |
| 32                   | 65.34                                                      | 93.39           |
| 33                   | 45.45                                                      | 93.27           |
| 34                   | 46.51                                                      | 66.35           |
| 35                   | 43.25                                                      | 46.62           |
| 36                   | 47.34                                                      | 74.16           |
| 37                   | 36.70                                                      | 96.92           |
| 38                   | 14.36                                                      | 54.11           |
| 39                   | 54.15                                                      | 91.70           |
| 40                   | 55.98                                                      | 98.05           |
| 41                   | 26.33                                                      | 77.25           |
| 42                   | 48.38                                                      | 90.72           |
| 43                   | 72.68                                                      | 95.40           |
| 44                   | 20.02                                                      | 25.83           |
| 45                   | -8.50                                                      | 251.02          |
| 46                   | 43.72, 49.45                                               | 46.31, 28.90    |
| 47                   | --                                                         | --              |
| 48                   | --                                                         | --              |
| 49                   | 52.03                                                      | 94.98           |
| 50                   | 60.75                                                      | 101.92          |
| 51                   | 48.65, 35.46                                               | 96.66, 81.74    |

The symbol "--" signifies that the compound has not shown any characteristic in its DSC traces.

## Figure S4: DSC traces for all solid compounds

### Figure S4:1

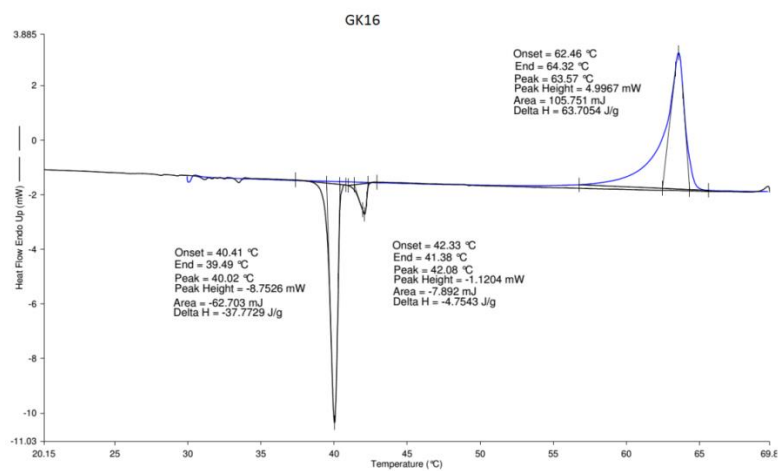

### Figure S4:2

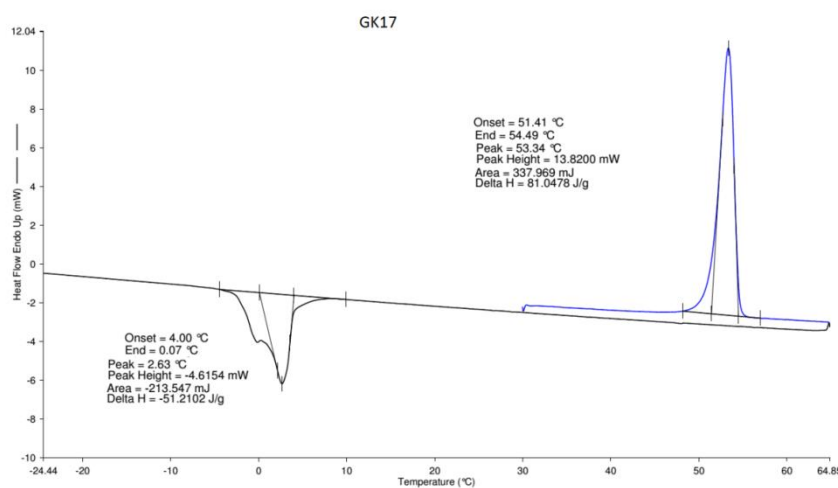

### Figure S4:3

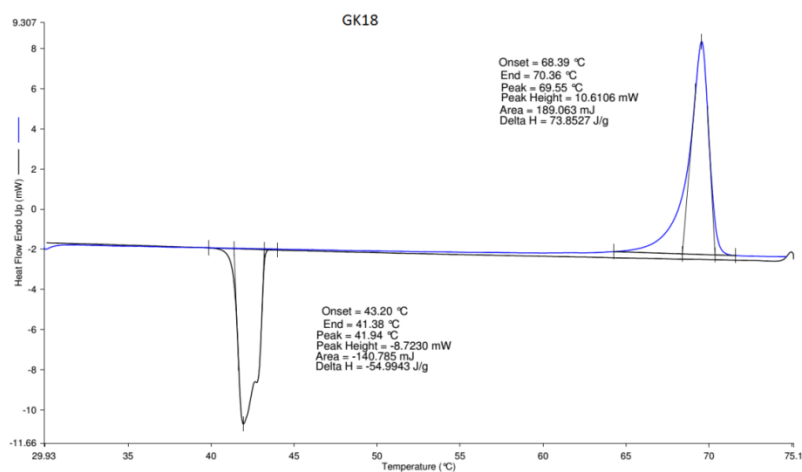

**Figure S4:4**

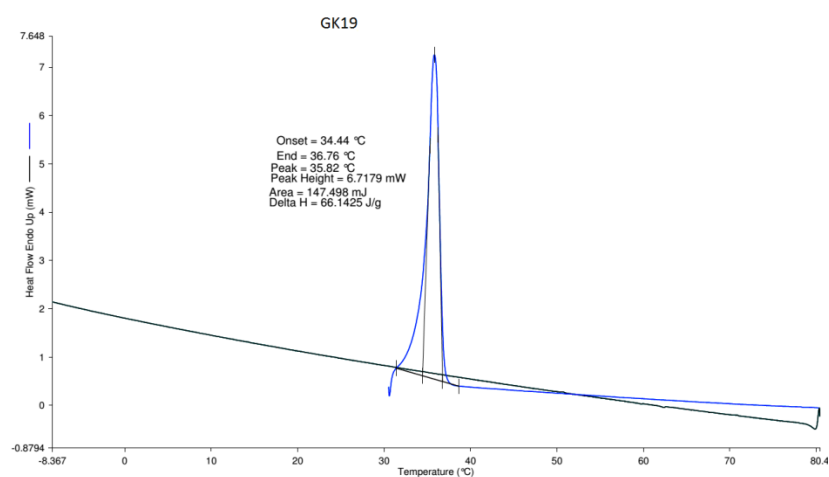

**Figure S4:5**

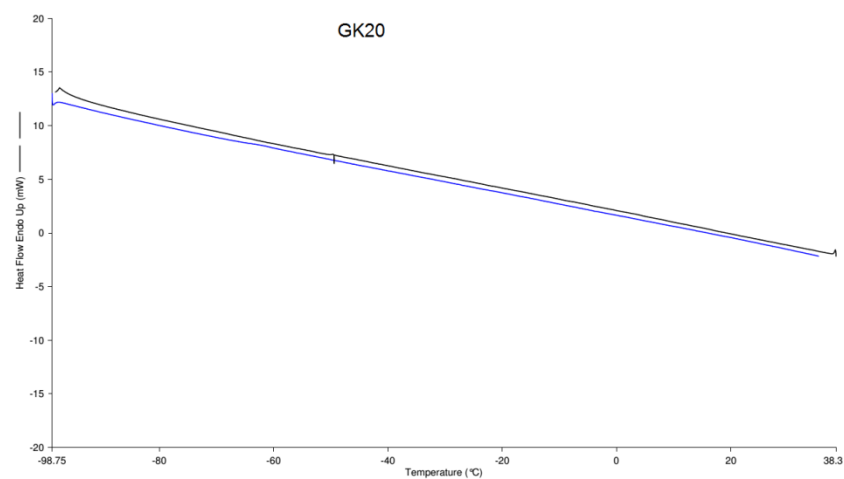

**Figure S4:6**

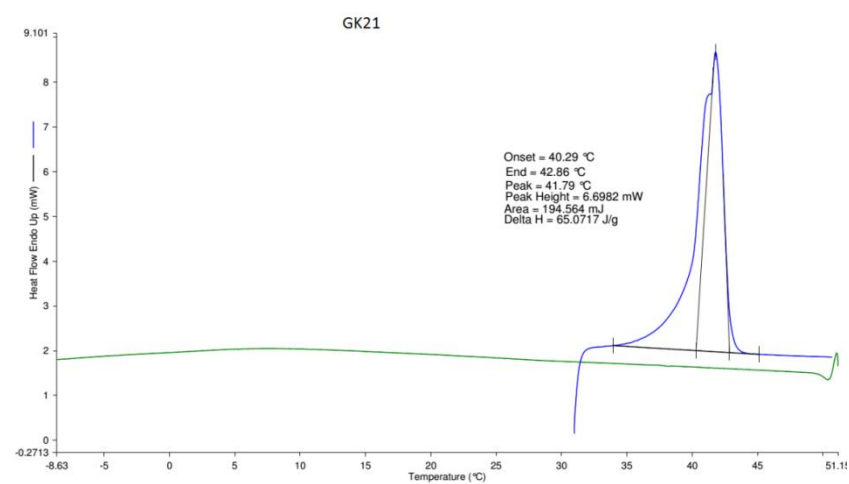

**Figure S4:7**

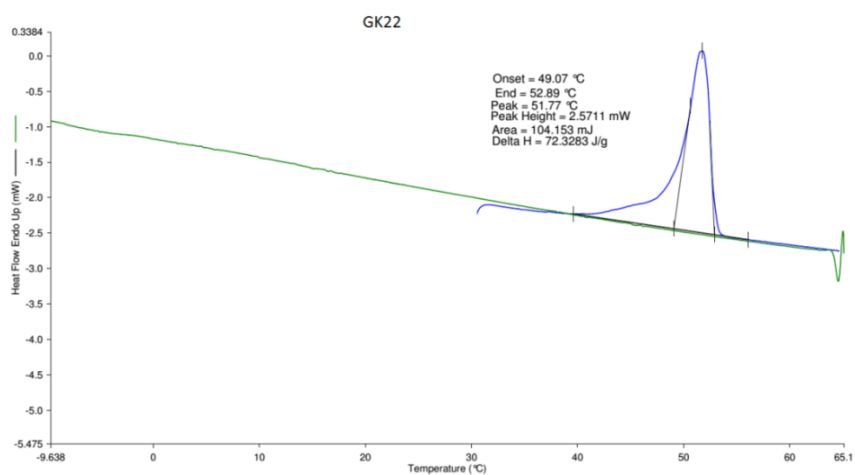

Figure S4:8

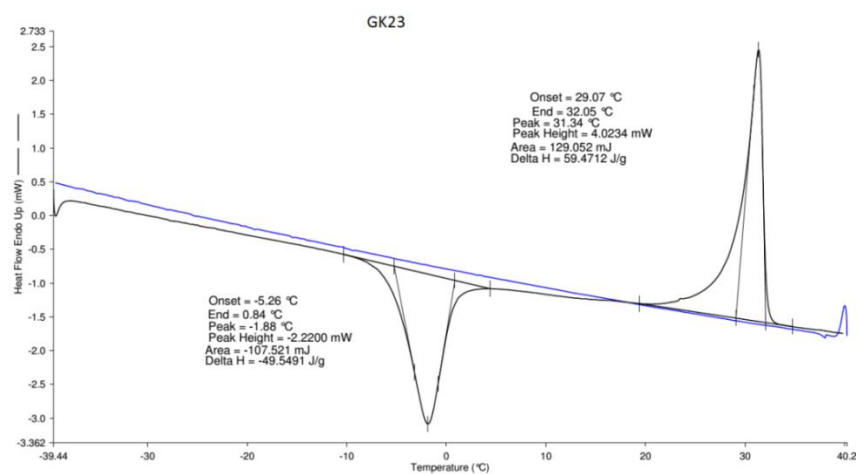

Figure S4:9

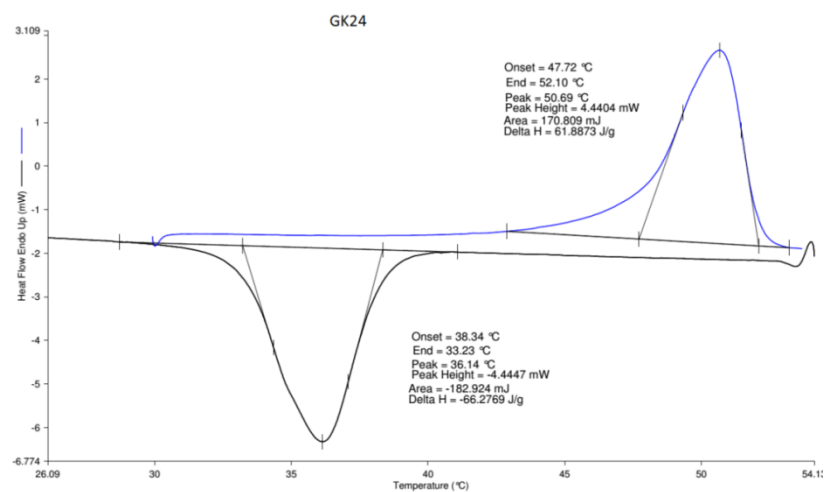

Figure S4:10

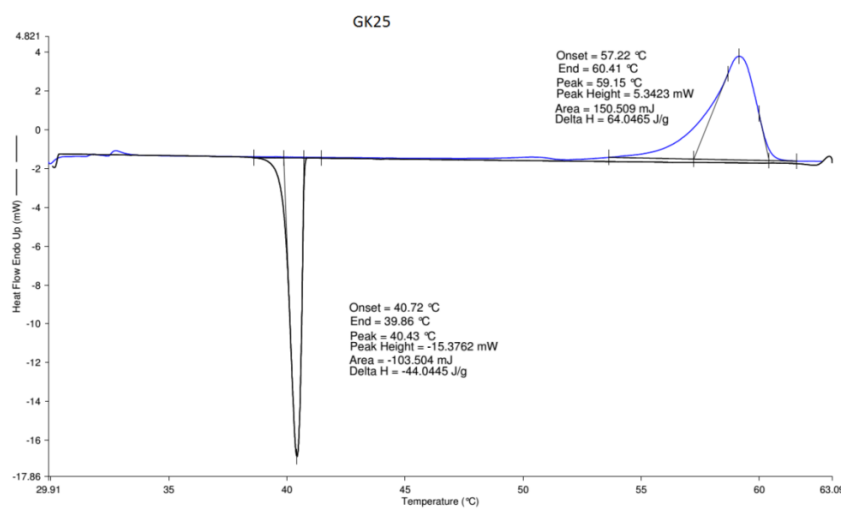

**Figure S4:11**

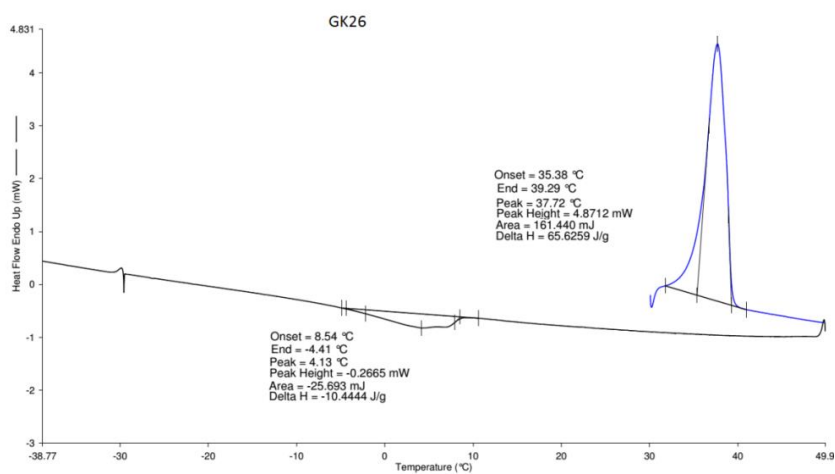

**Figure S4:12**

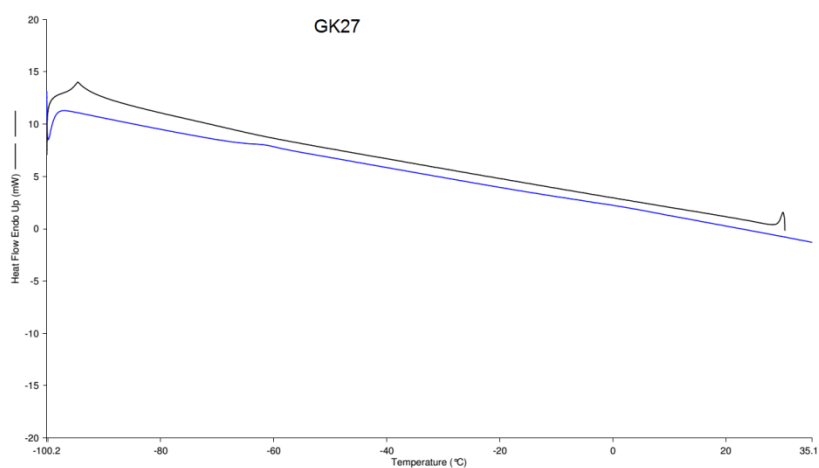

**Figure S4:13**

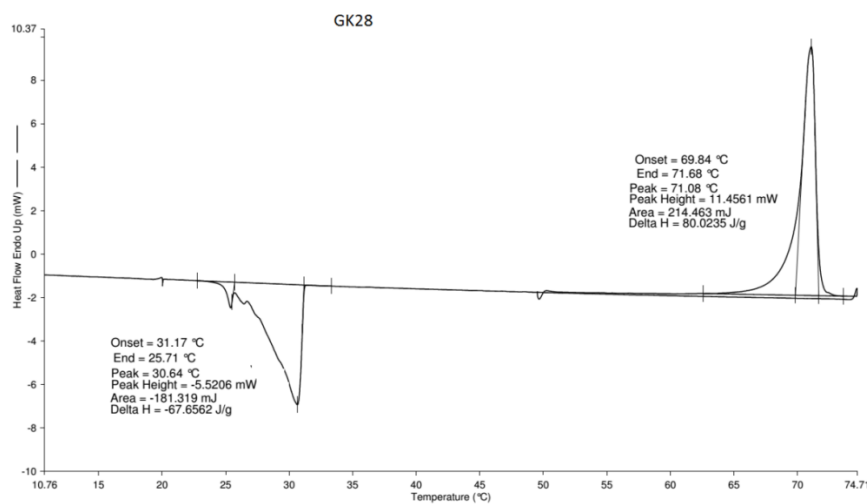

**Figure S4:14**

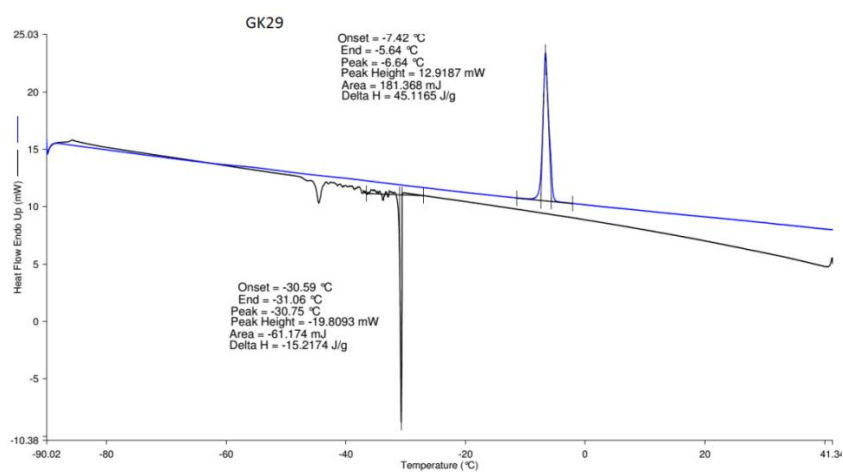

**Figure S4:15**

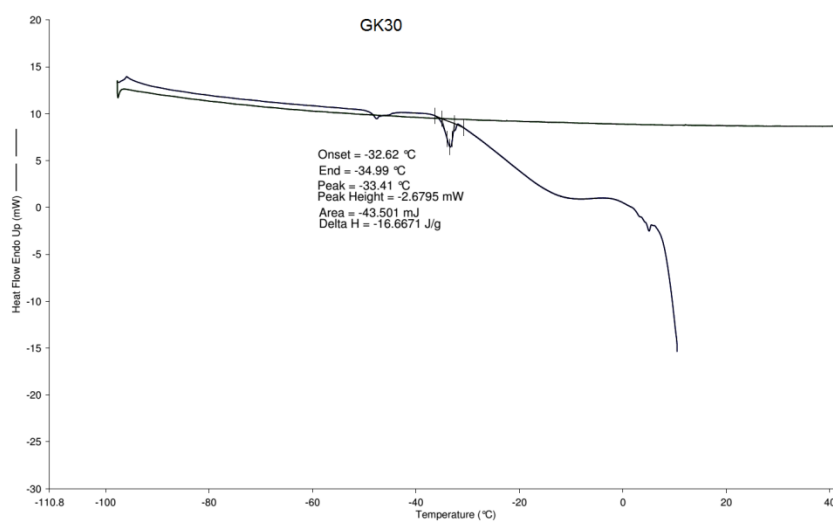

**Figure S4:16**

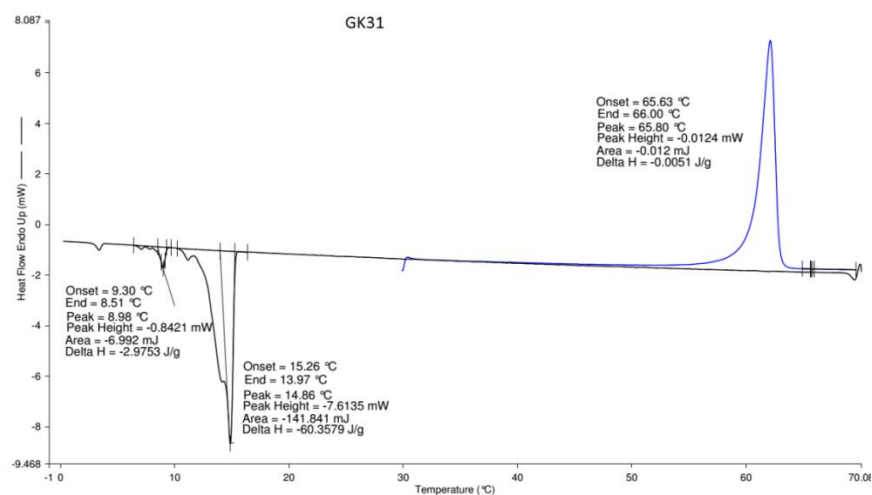

**Figure S4:17**

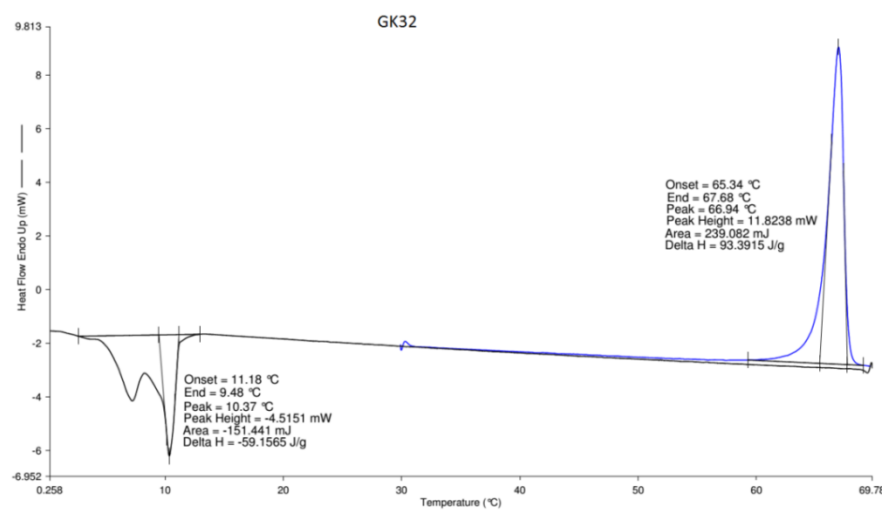

**Figure S4:18**

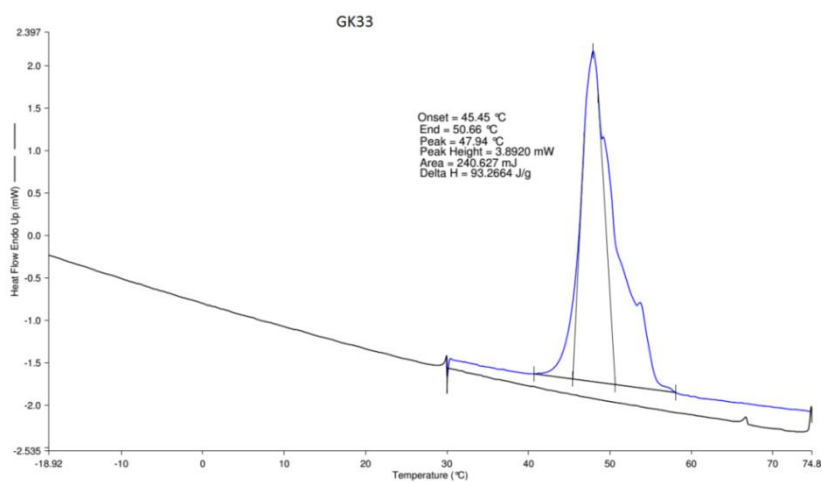

**Figure S4:19**

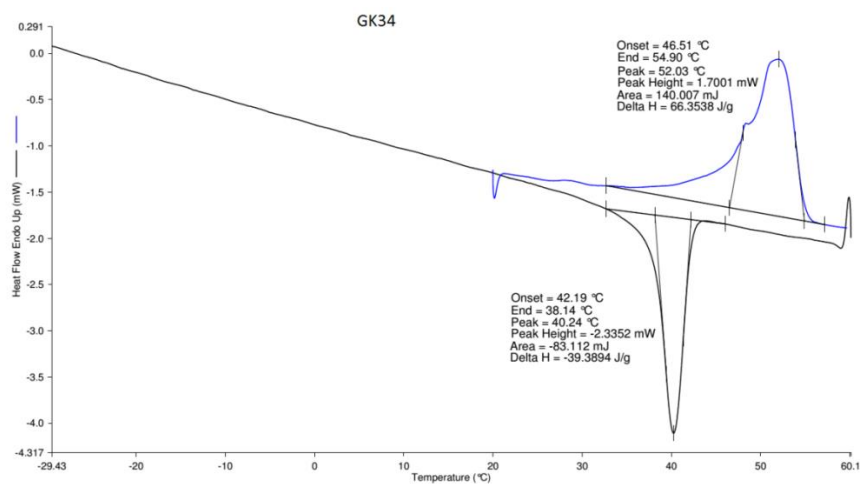

Figure S4:20

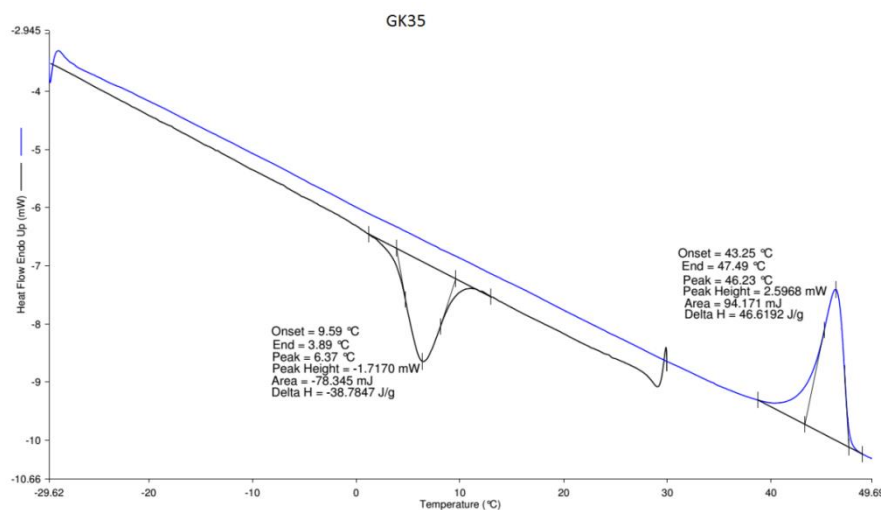

Figure S4:21

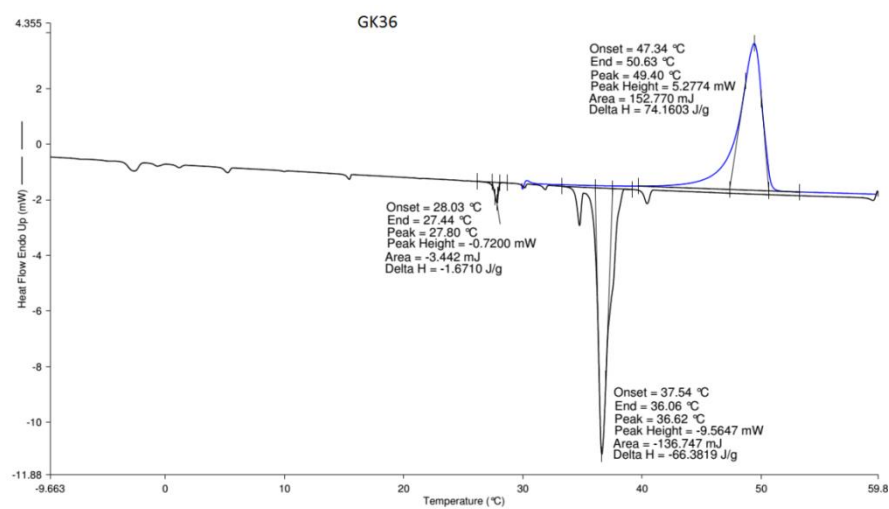

Figure S4:22



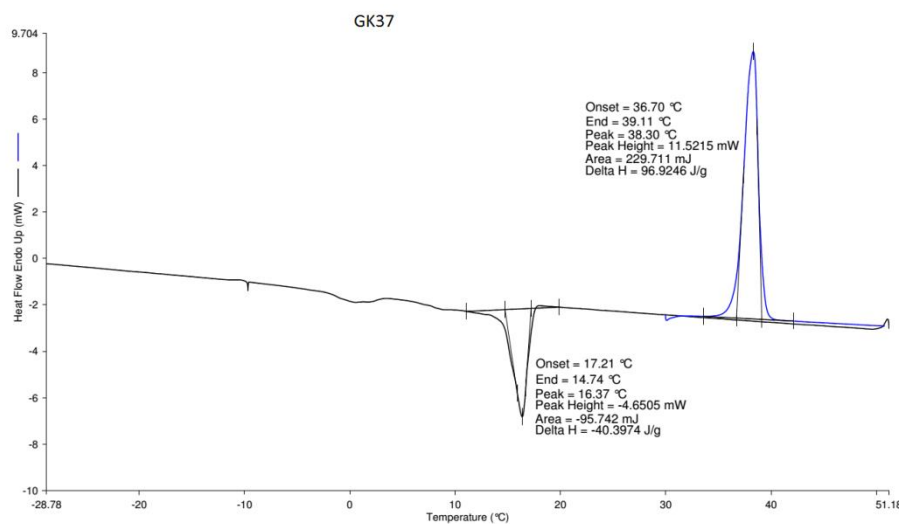

**Figure S4:23**

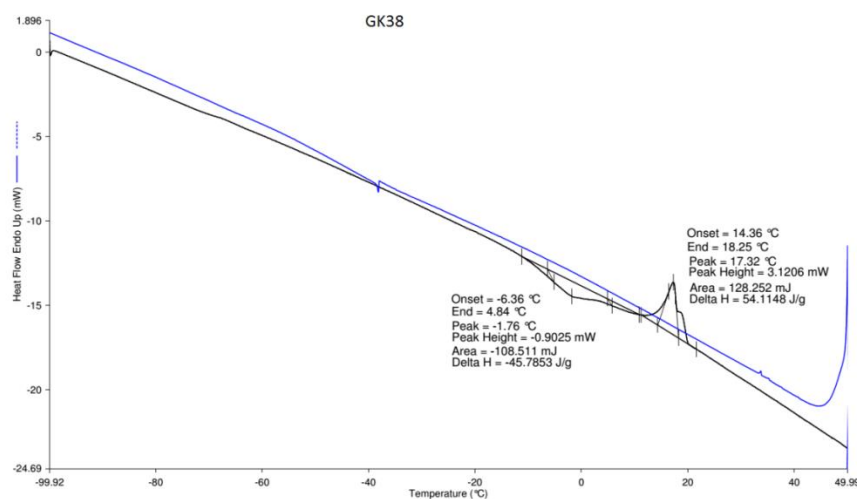

**Figure S4:24**

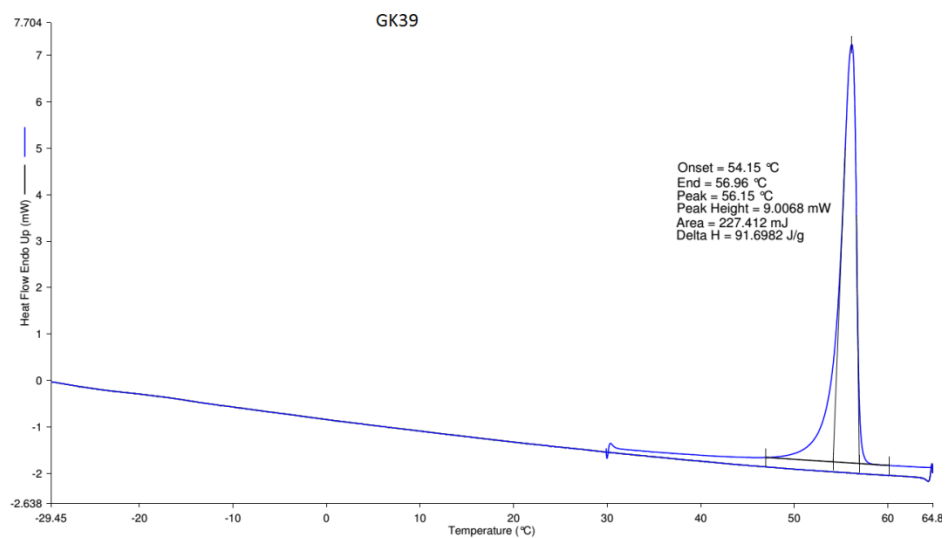

**Figure S4:25**

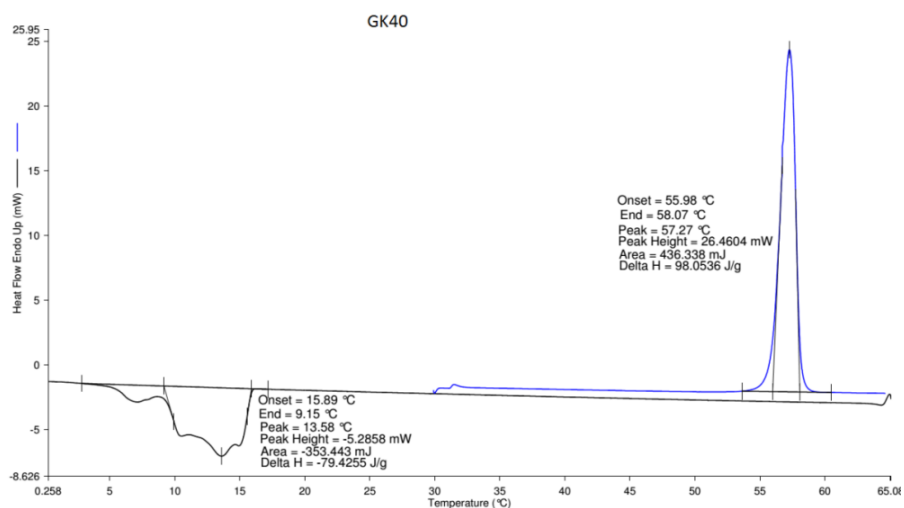

**Figure S4:26**

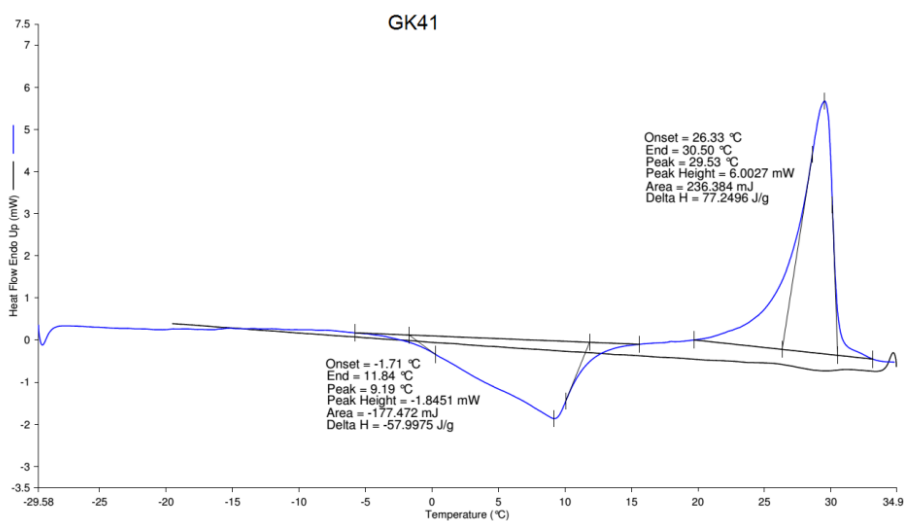

**Figure S4:27**

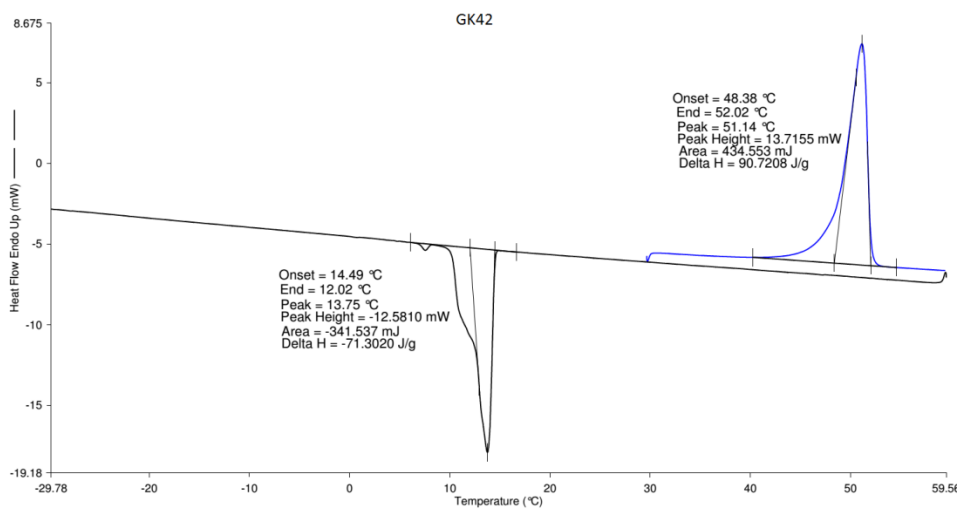

**Figure S4:28**

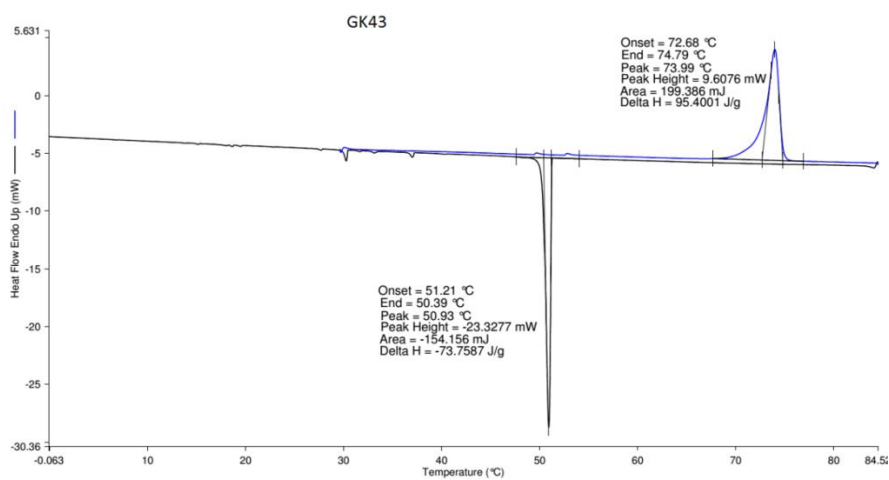

Figure S4:29

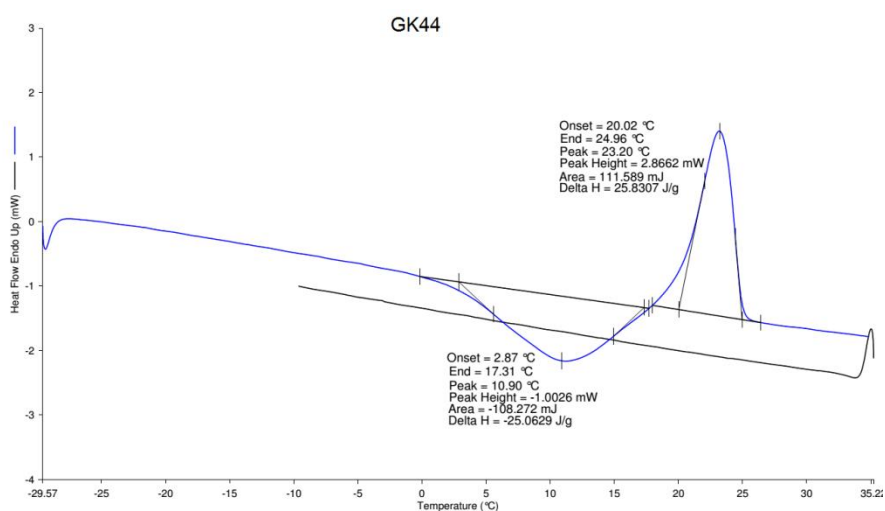

Figure S4:30

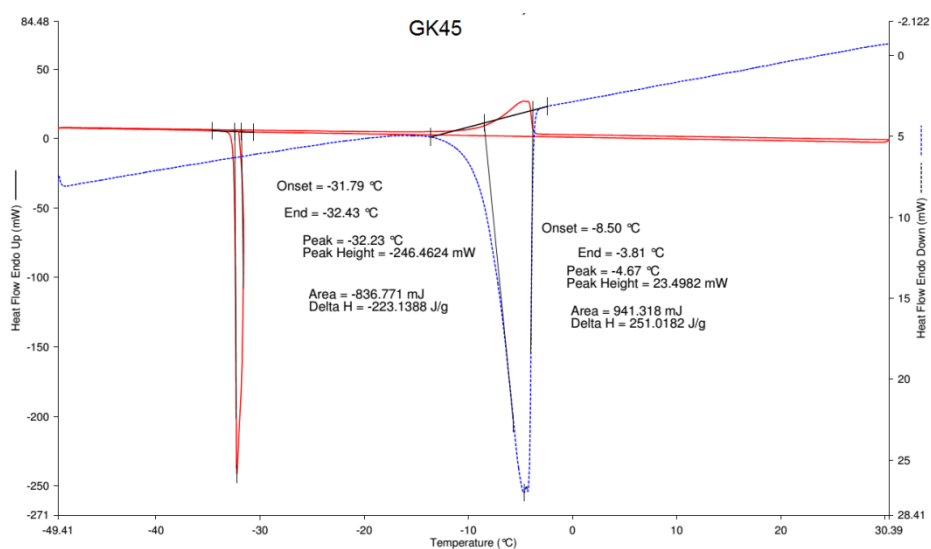

Figure S4:31

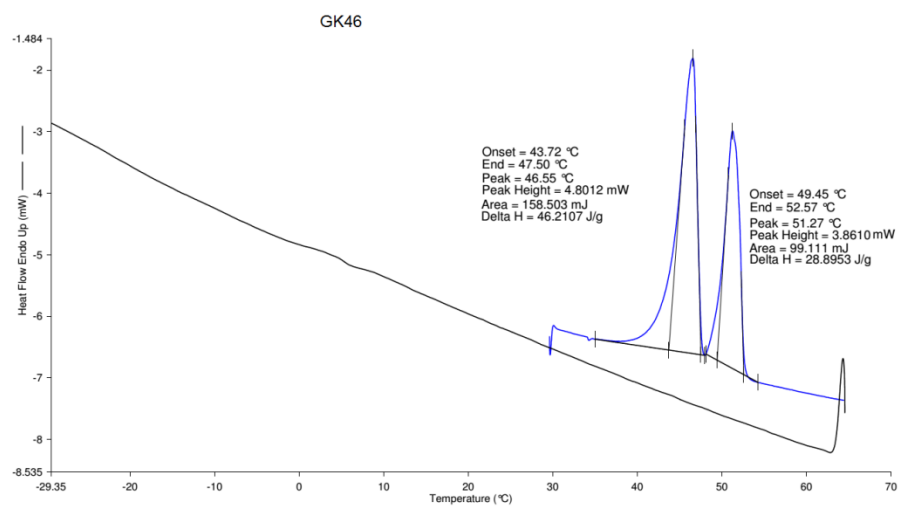

**Figure S4:32**

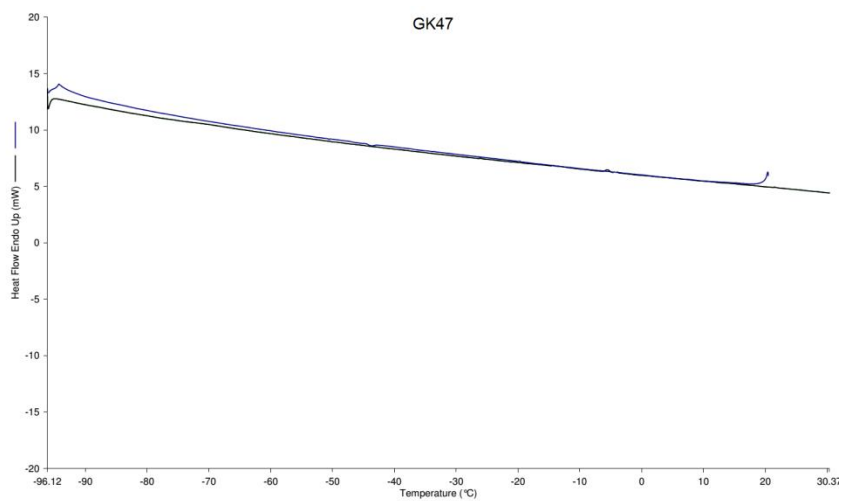

**Figure S4:33**

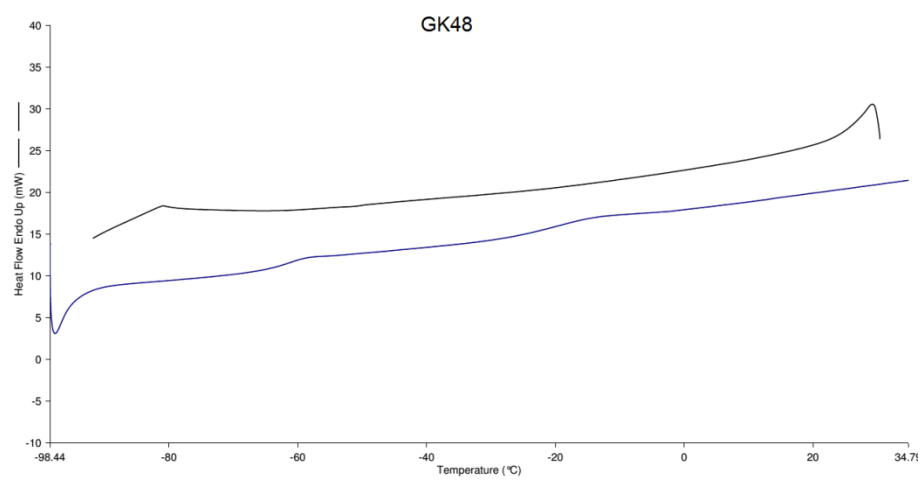

**Figure S4:34**

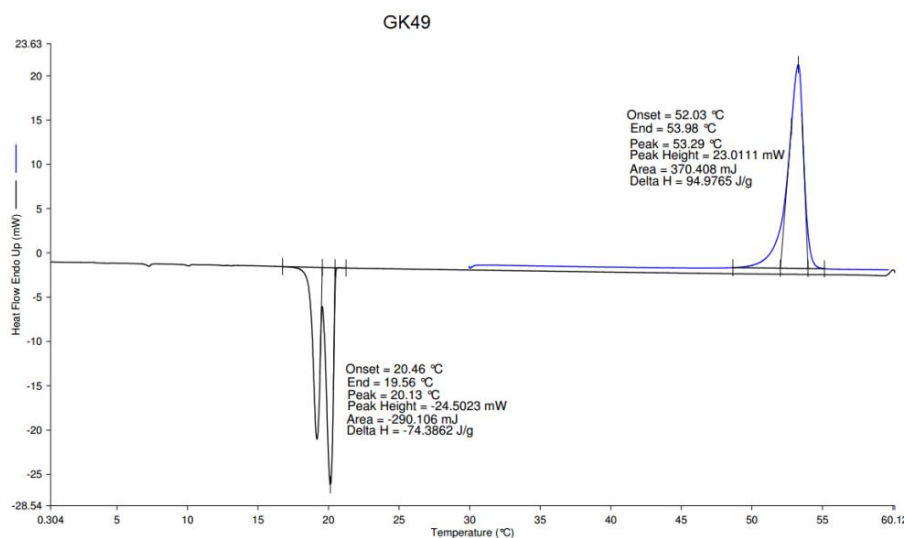

**Figure S4:35**

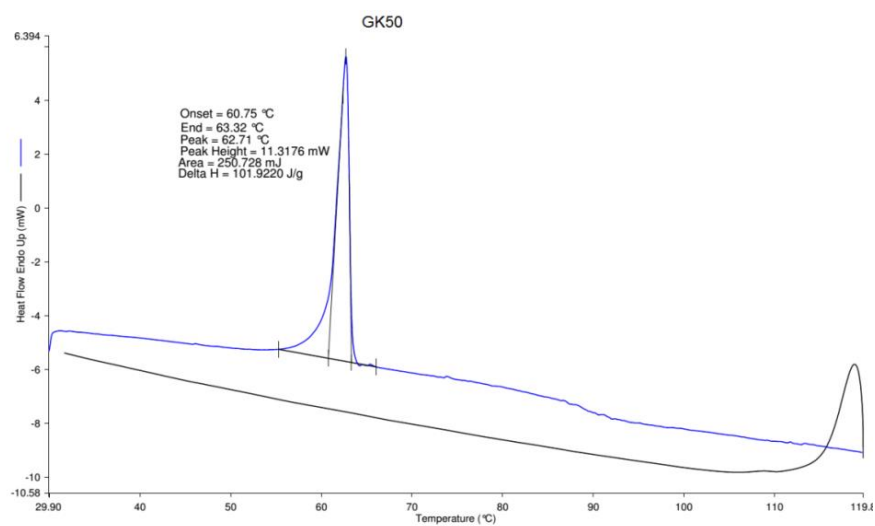

**Figure S4:36**

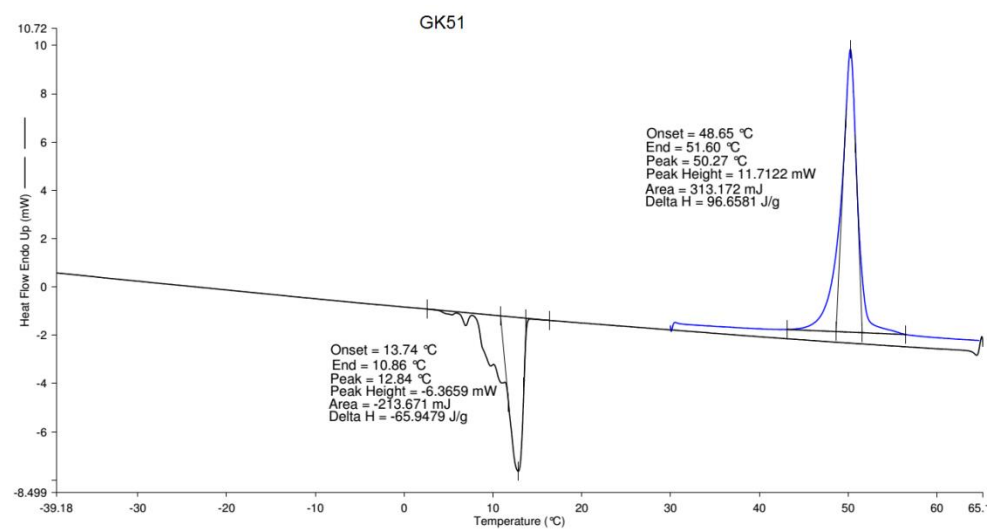

**Figure S4:** *ORTEP* of all compounds drawn with 50% ellipsoidal probability with atom-numbering scheme.

**Figure S5:1 Compound 16F1**

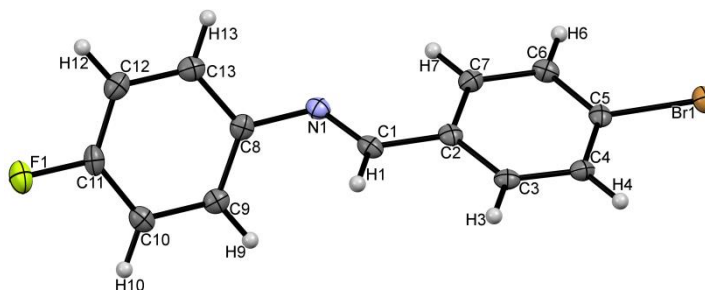

**Figure S5:2 Compound 16F2**

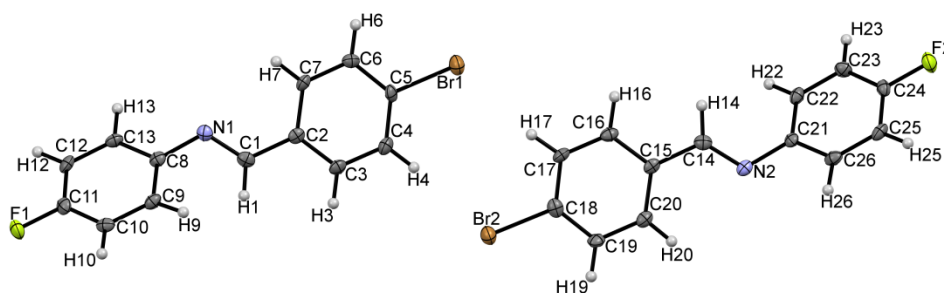

**Figure S5:3 Compound 17**

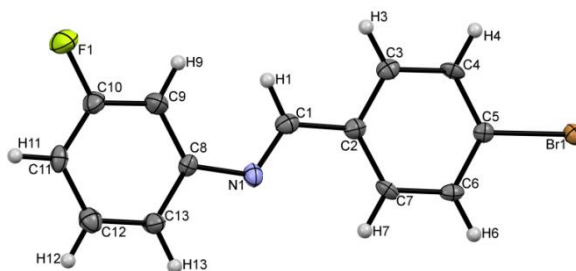

**Figure S5:4 Compound 18F1**

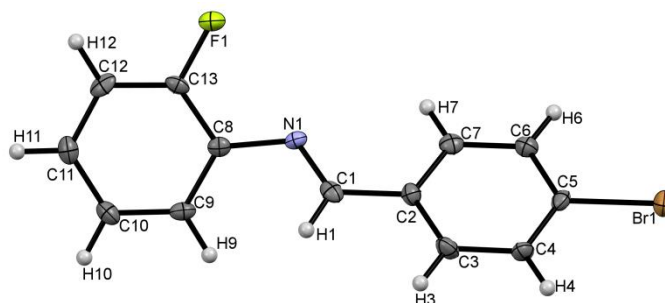

**Figure S5:5 Compound 18F2**

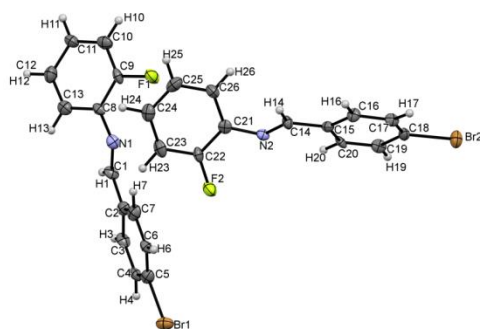

**Figure S5:6 Compound 19**

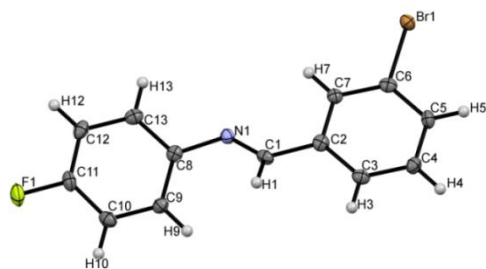

**Figure S5:7 Compound 21**

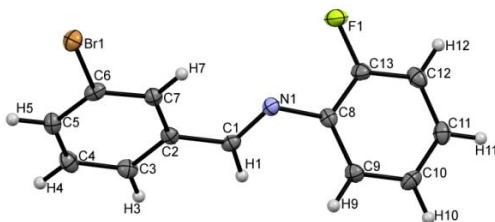

**Figure S5:8 Compound 22**

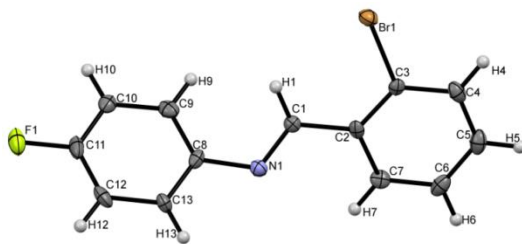

**Figure S5:9 Compound 23**

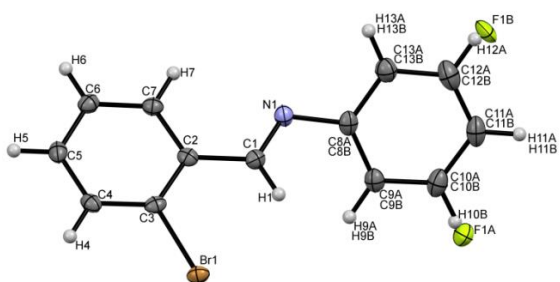

**Figure S5:10 Compound 24**

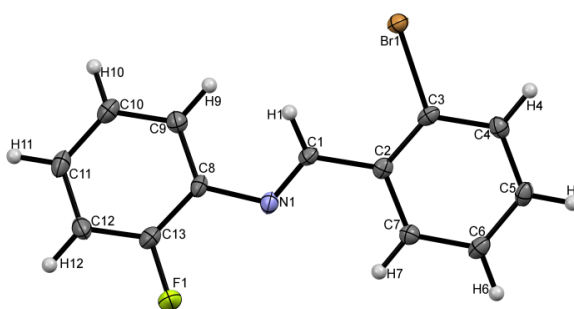

**Figure S5:11 Compound 25**

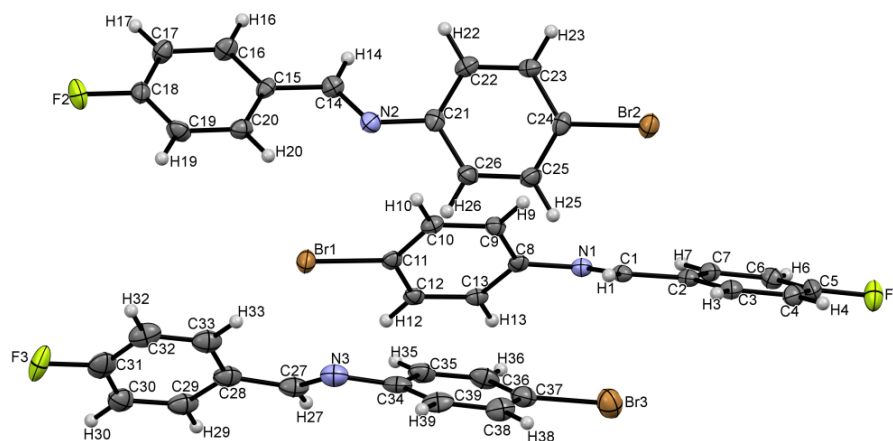

**Figure S5:12 Compound 26**

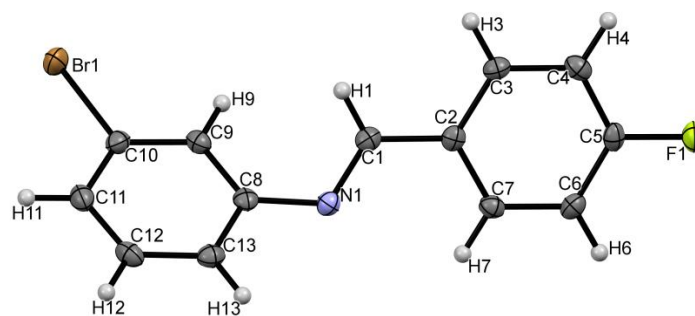

**Figure S5:13 Compound 28F1**

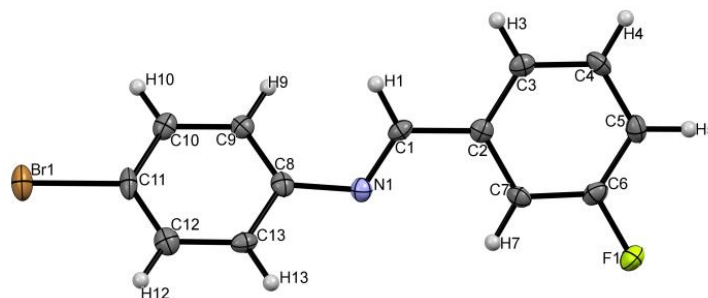



**Figure S5:14 Compound 28F2**

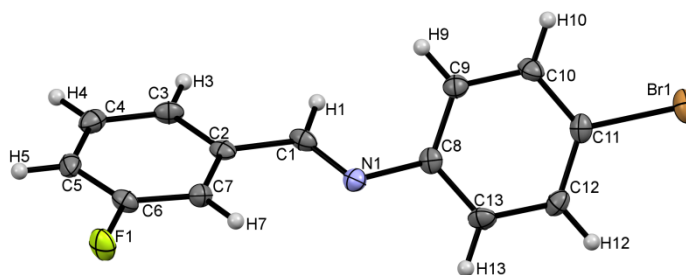

**Figure S5:15 Compound 31**

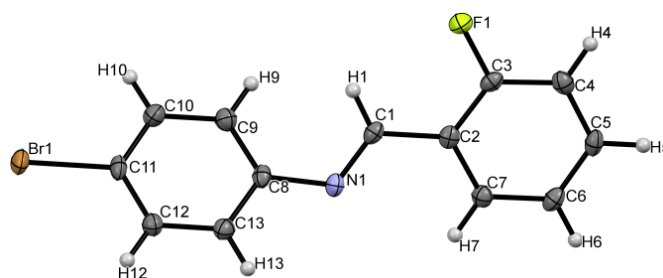

**Figure S5:16 Compound 32**

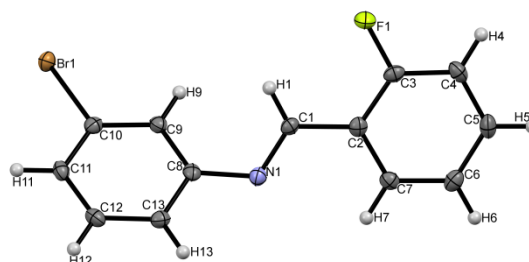

**Figure S5:17 Compound 33**

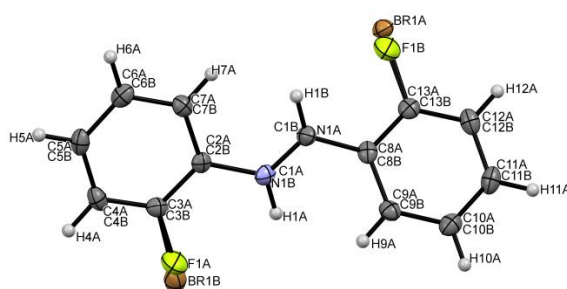

**Figure S5:18 Compound 34**

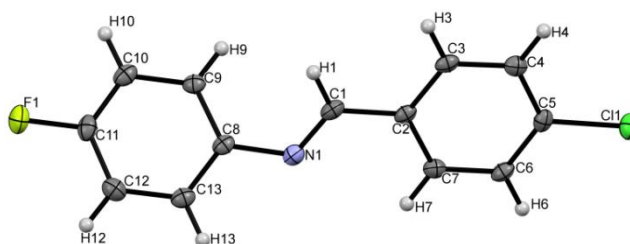

**Figure S5:19 Compound 35**

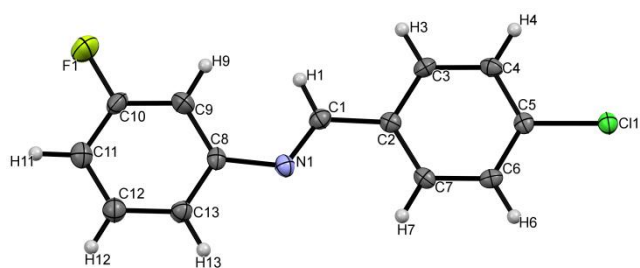

**Figure S5:20 Compound 36F1**

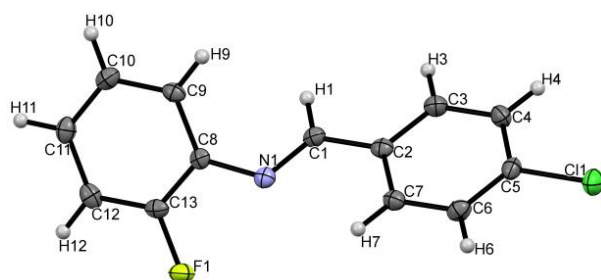

**Figure S5:21 Compound 36F2**

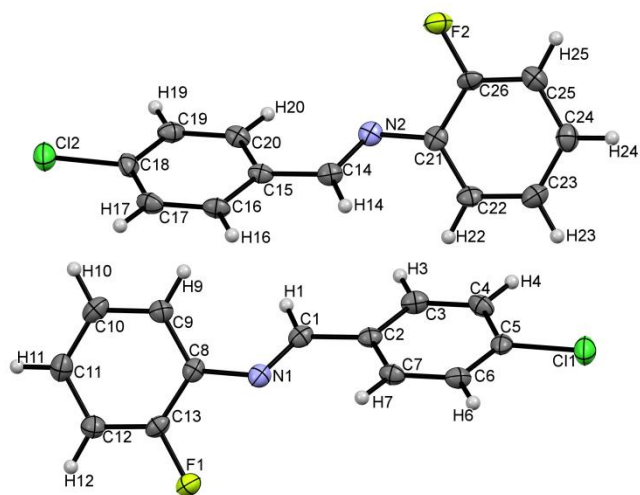

**Figure S5:22 Compound 37**

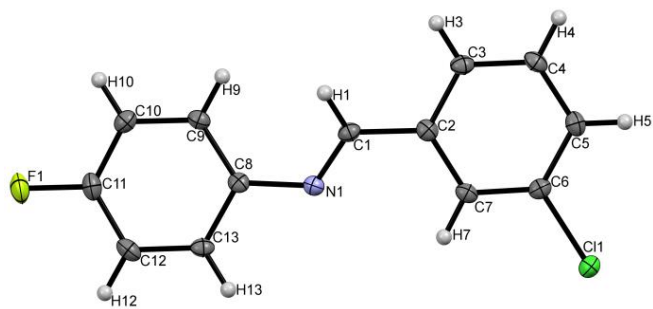

**Figure S5:23 Compound 39**

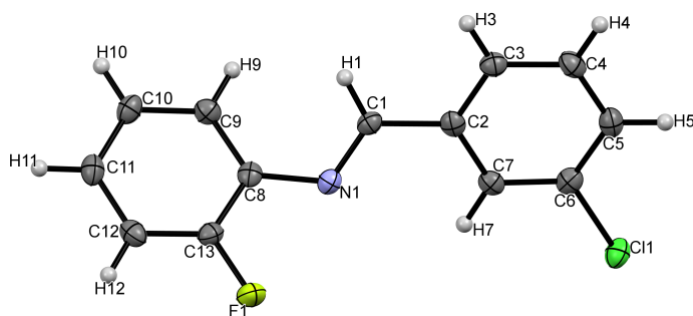

**Figure S5:24 Compound 40**

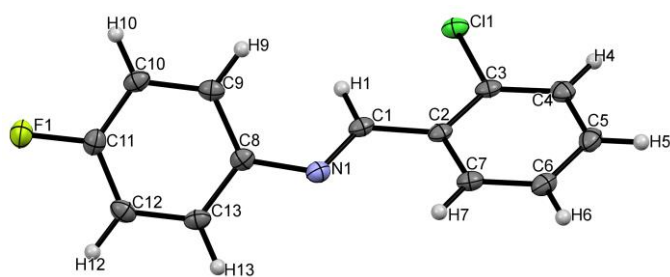

**Figure S5:25 Compound 41**

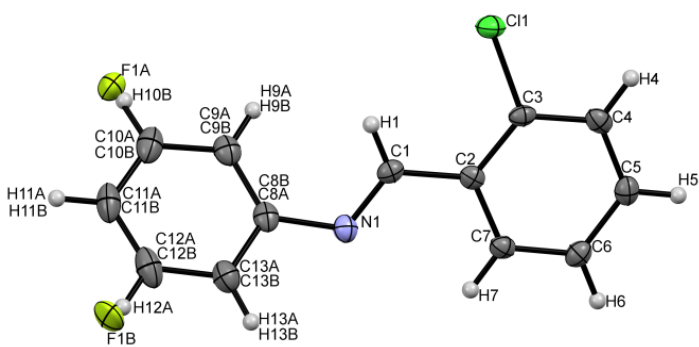

**Figure S5:26 Compound 42**

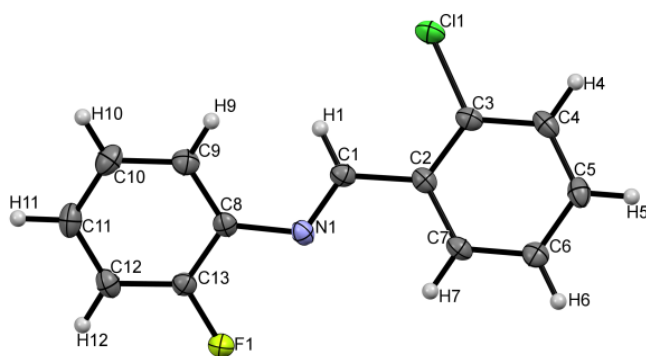

**Figure S5:27 Compound 43**

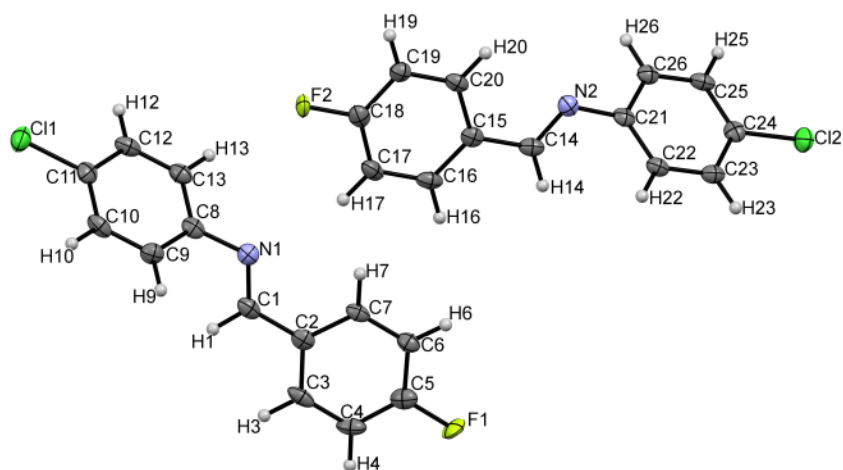

**Figure S5:28 Compound 44**

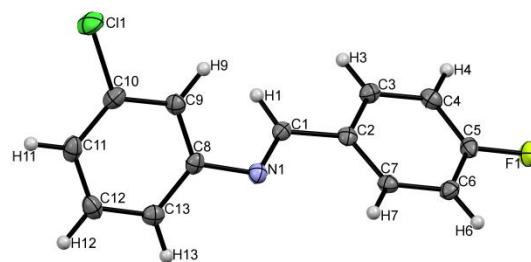

**Figure S5:29 Compound 46**

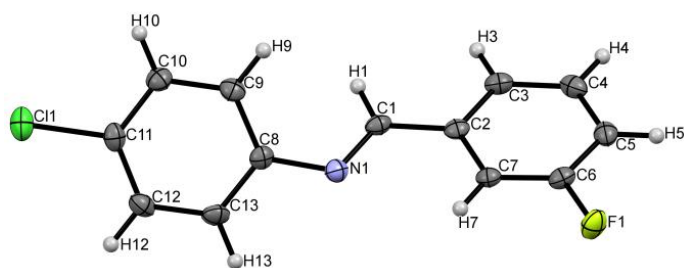

**Figure S5:30 Compound 49**

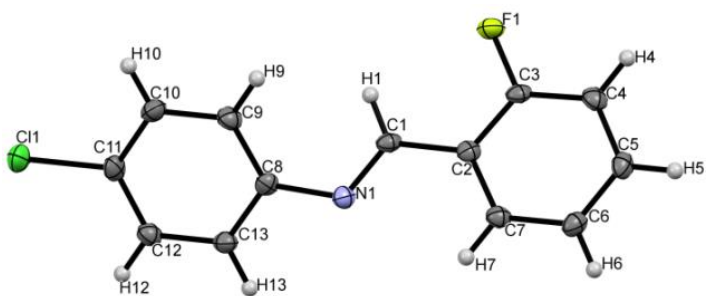

**Figure S5:31 Compound 50**

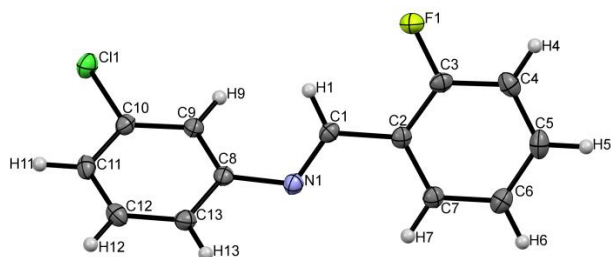

**Figure S5:32 Compound 51**

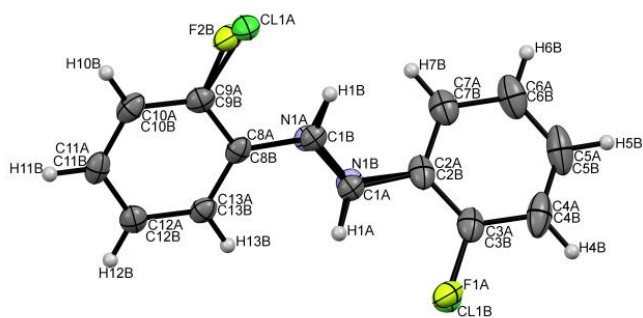

## References

1. APEX2, SADABS and SAINT; Bruker AXS Inc.: Madison, Wisconsin, USA, **2008**.
2. Dolomanov, O. V.; Bourhis, L. J.; Gildea, R. J.; Howard, J. A. K.; Puschmann, H. *J. Appl. Cryst.* **2009**, *42*, 339–341.
3. Farrugia, L. J. WinGx, *J. Appl. Cryst.* **1999**, *32*, 837–838.
4. Sheldrick, G. M. *Acta Crystallogr.* **2008**, *A64*, 112–122.
5. Nardelli, M. *J. Appl. Crystallogr.* **1995**, *28*, 569.

6. Spek, A. L. *Acta Crystallogr.* **2009**, D65, 148–155.
7. (a) Thalladi, V. R.; Weiss, H. –C.; Bläser, D.; Boese, R.; Nangia, A.; Desiraju, G. R. *J. Am. Chem. Soc.* **1998**, 120, 8702–8710. (b) Choudhury, A. R.; Winterton, N.; Steiner, A.; Cooper, A. I.; Johnson, K. A. *J. Am. Chem. Soc.* **2005**, 127, 16792–16793. (c) Choudhury, A. R.; Islam, K.; Kirchner, M. T.; Mehta, G.; Guru Row, T. N. *J. Am. Chem. Soc.* **2004**, 126, 12274–12275
8. <http://www.ohcd-system.com/infos/infos.htm>.
